# Supplementary material for: Heart Failure Severity Closely Correlates with Intestinal Dysbiosis and Subsequent Metabolomic Alterations
Source: MDPI journal article supplement (doi:10.3390/biomedicines10040809), 2022-03-30
Supplement: s1 [file s1]

## Supplementary Data

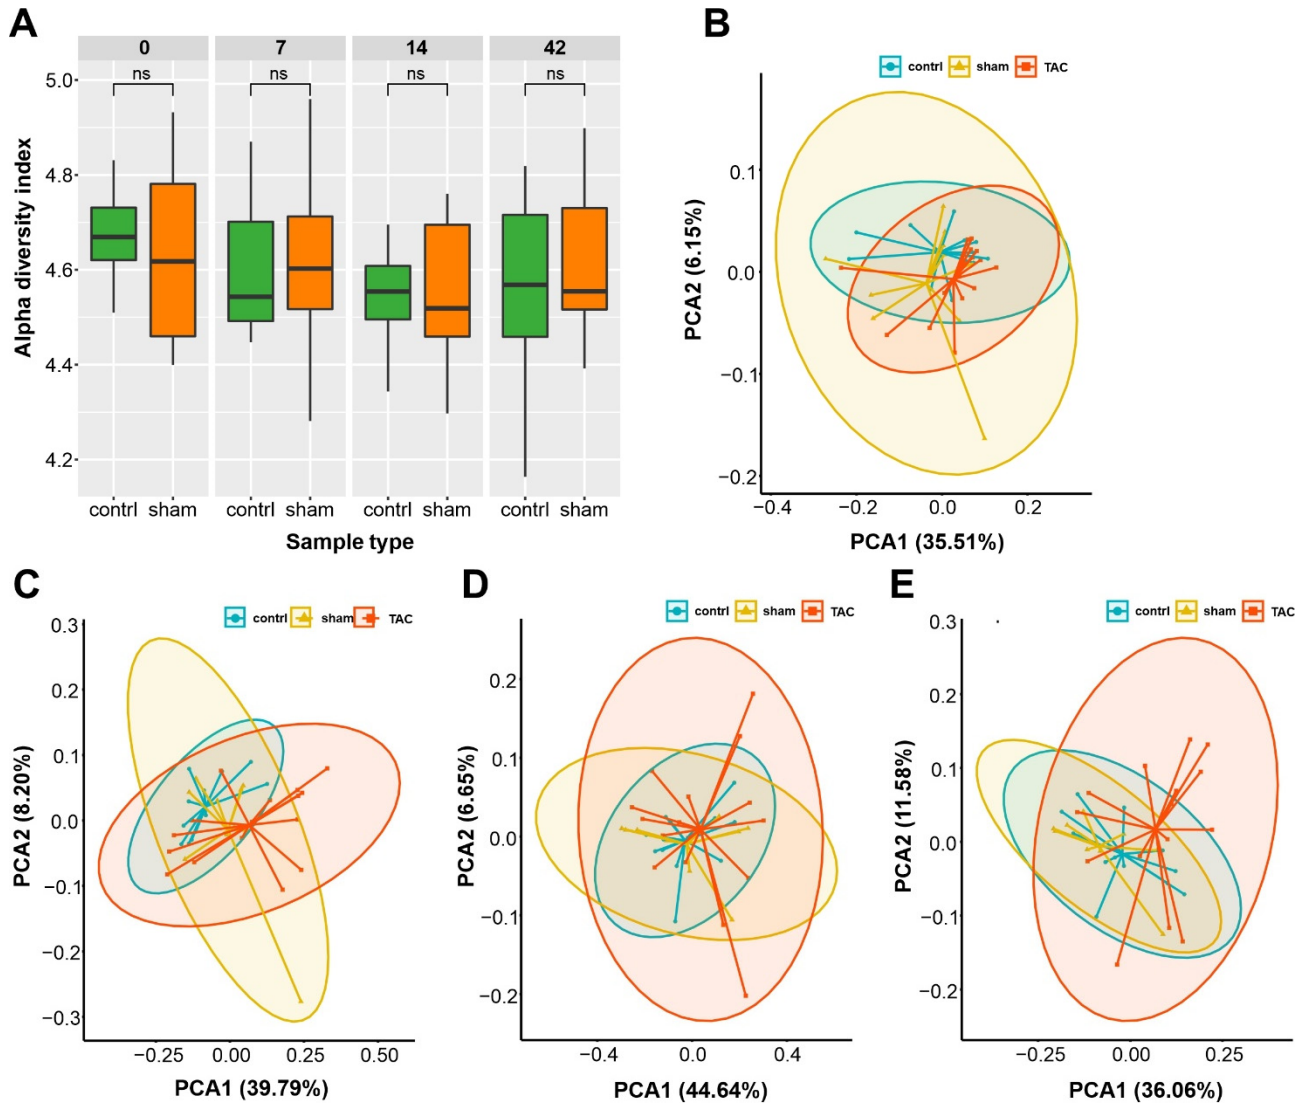

**Supplementary Figure S1: Alpha and Beta diversity - A:** Shannon alpha diversity index for sham and control sample-types with no significant differences at different time-points. **B:** PCoA plot showing for 0<sup>th</sup> day control, sham and TAC samples. **C:** PCoA plot showing significant difference in TAC and sham sample-types for 1<sup>st</sup> week (7<sup>th</sup> day). **D:** PCoA plot for 2<sup>nd</sup> week (14<sup>th</sup> day) sample comparison showing distinct cluster of TAC samples. **E:** PCoA plot for 6<sup>th</sup> week (42<sup>nd</sup> day) showing distinct cluster as compared to sham and control sample-types.

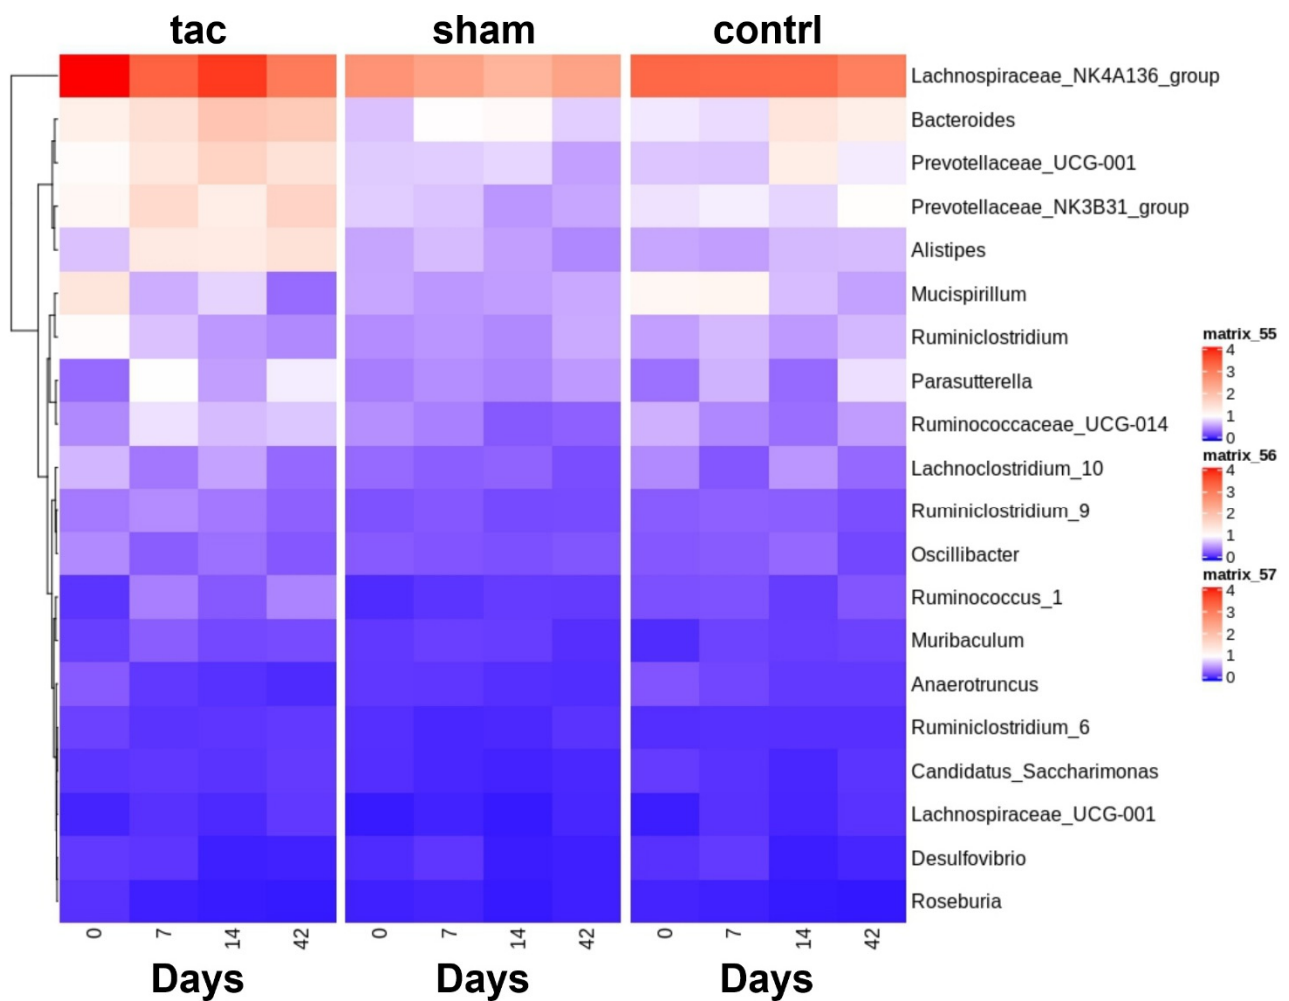

**Supplementary Figure S2:** Heatmap of relative abundance of top-20 genera at different time-points in TAC, sham and control samples. Variation in abundances of genera with different time-points were more in TAC samples as compared to sham and control samples.

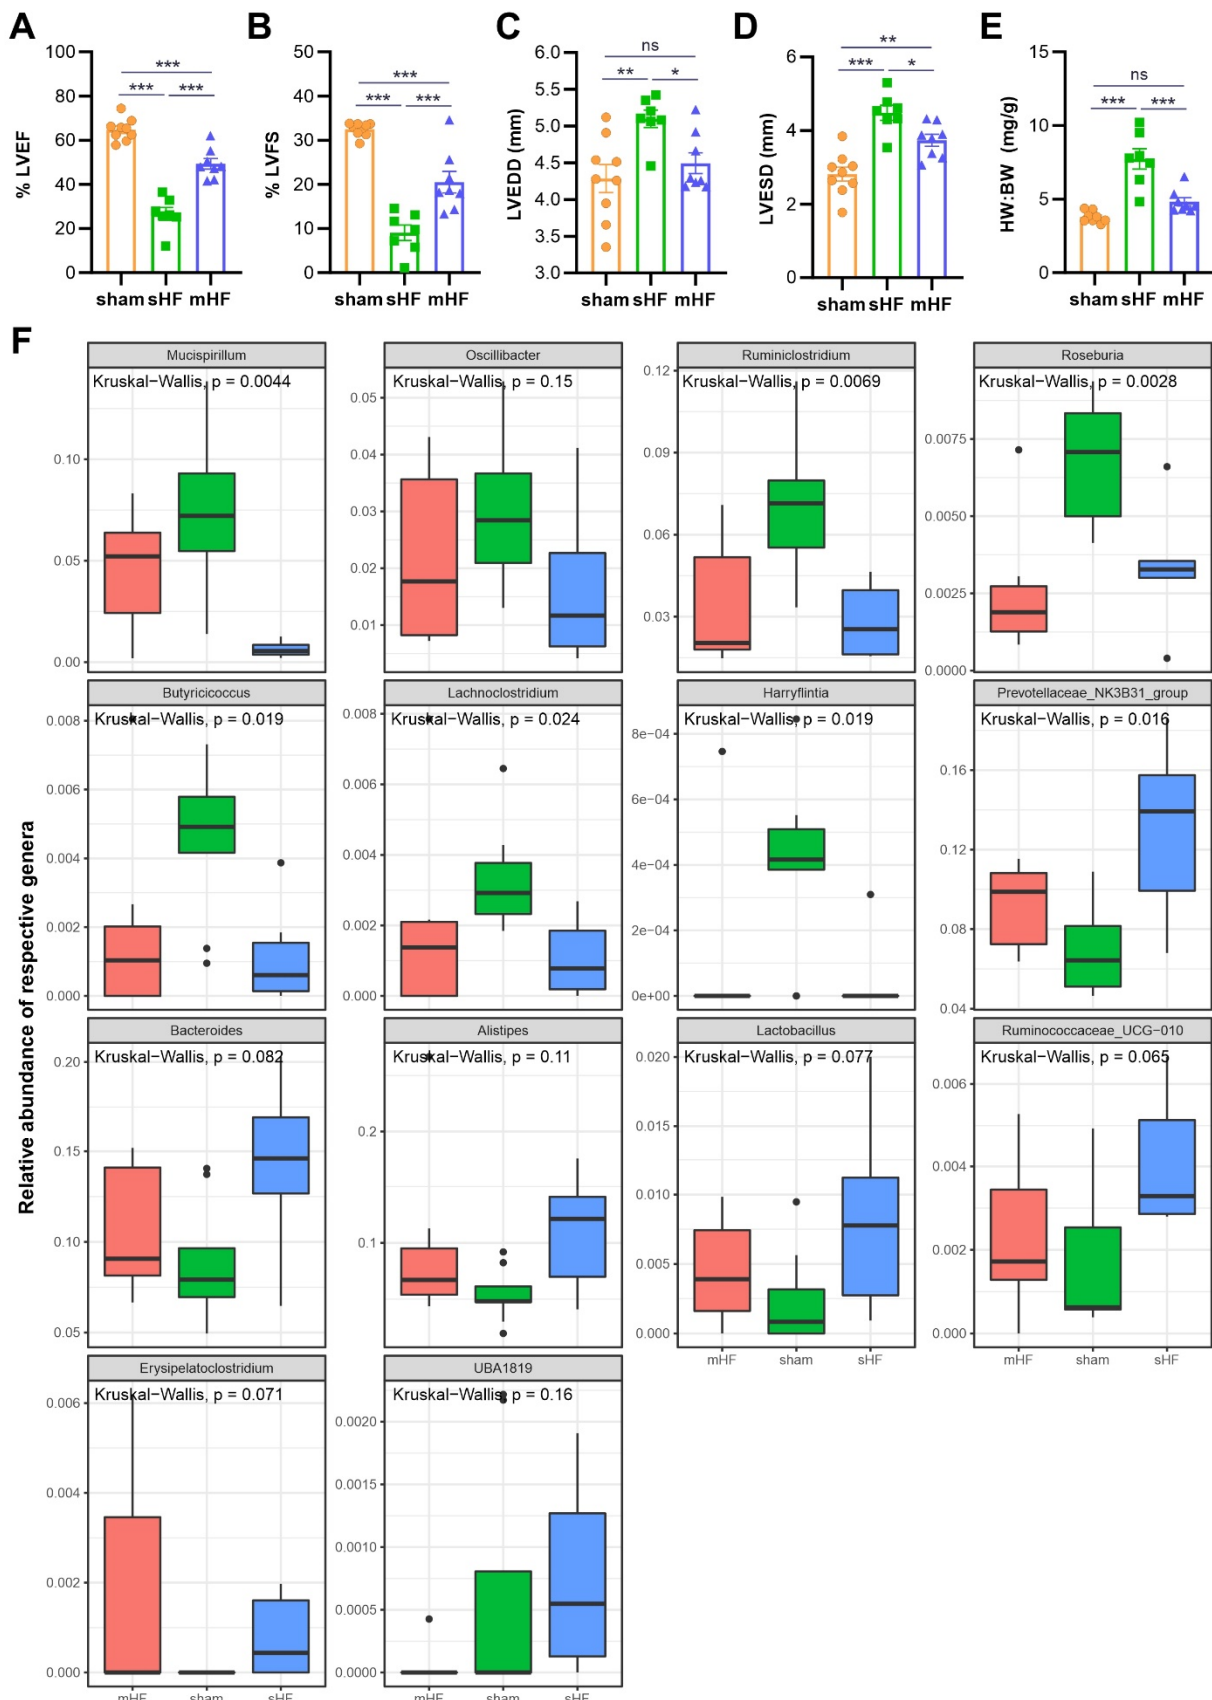

**Supplementary Figure S3:** Echocardiography parameters represented as bar graphs indicate severely reduced ejection fraction (A) and fractional shortening (B), and increased left ventricular end-diastolic- (C) and systolic- (D) diameters in sHF compared to mHF and sham groups. E: Bar graph showing heart weight to body weight ratios. (N for 3A - 3E = Sham – 9; mHF – 8; sHF - 7). F: Relative abundance of significantly abundant genera

found by Wilcoxon test ( $P\text{-value} \leq 0.05$ ) in sham, mHF and sHF samples. Total 13 genera with 3 phyla were found to be differentially abundant in sHF, mHF and sham comparisons.

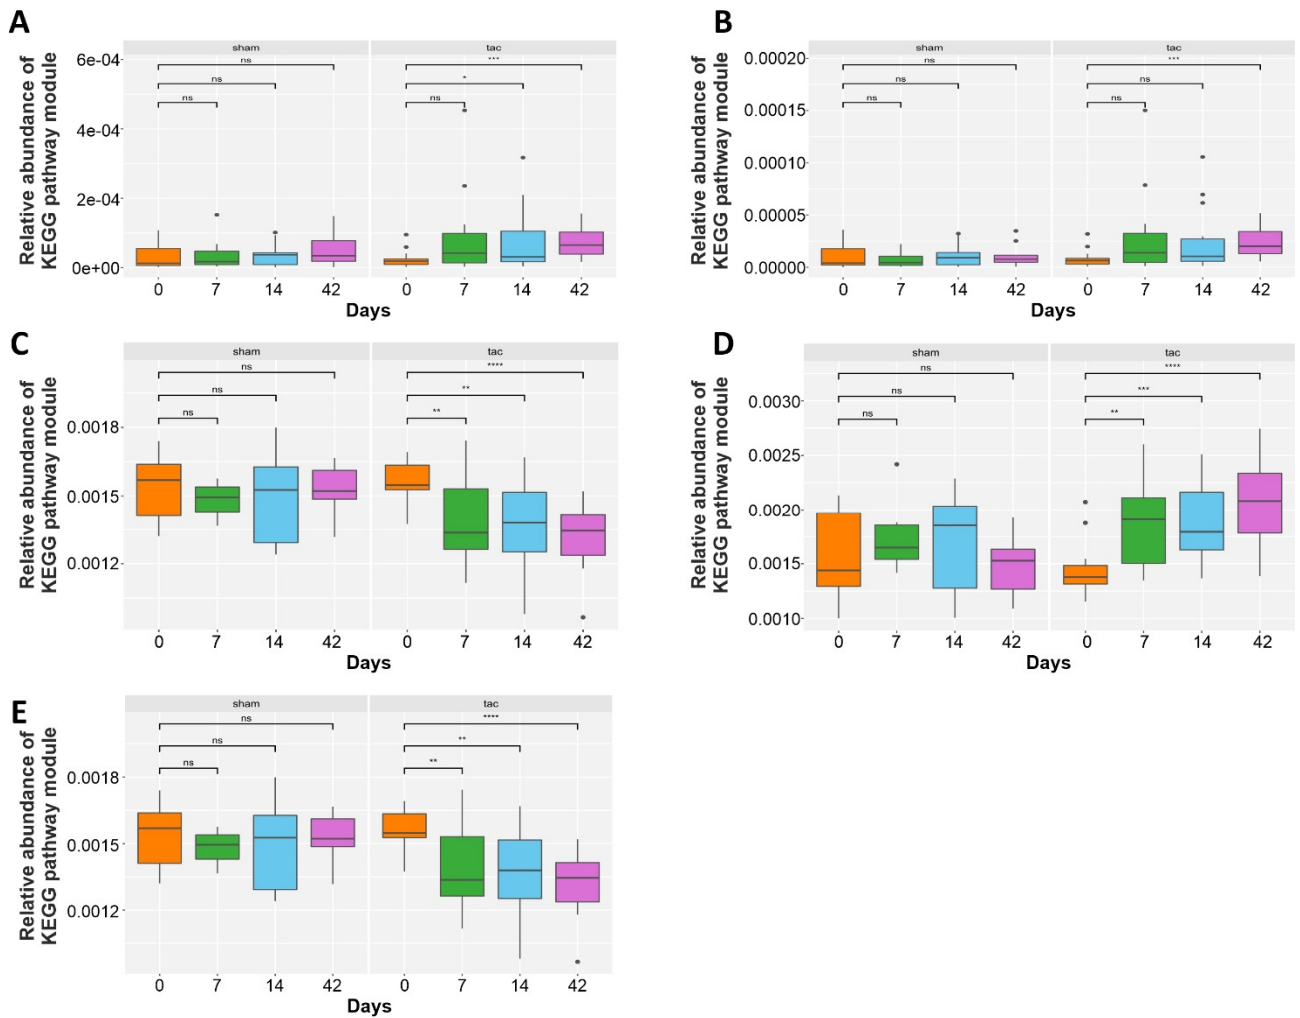

**Supplementary Figure S4:** Box plots showing differentially abundant KEGG pathway modules for amino acid metabolism in sham and TAC samples at different time-points. **A:** Branched chain amino acid degradation related genes in sham and TAC samples. Significant increase in BCAA degradation genes in TAC at 2<sup>nd</sup> and 6<sup>th</sup> week were found by Wilcoxon test. No significant differences observed in genes at different time-points in sham samples. **B:** Aromatic amino acid metabolism in sham and TAC samples showing increase in genes at different time-points in TAC samples, with significant differences at 6<sup>th</sup> week. **C:** Aromatic amino acid biosynthesis related genes in sham and TAC samples at different time-points. Significant changes in abundances were observed in 6<sup>th</sup> week samples as compared to initial abundances of genes. **D:** Positively-charged amino acid degradation genes were found to be increased in TAC samples with respect to time significantly as compared to sham samples. **E:** Positively charged amino acid biosynthesis genes were found to be decreased in TAC samples by Wilcoxon test ( $p\text{-value} \leq 0.05$ ) for each time-point comparison with initial samples.
