# Supplementary material for: Heart Failure Severity Closely Correlates with Intestinal Dysbiosis and Subsequent Metabolomic Alterations
Source: Biomedicines. 2022 Mar 30;10(4):809. doi: 10.3390/biomedicines10040809 (PMC9033061; doi:10.3390/biomedicines10040809)
Supplement: Supplementary file 1 [file biomedicines-10-00809-s001.zip › Rangrez-Gut microbiome_Supplementary_Table1.xlsx]

## Sheet: Rangrez-Gut microbiome_Suppleme
Kingdom "Phylum" "Class" "Order" "Family" "Genus" "Species"
GATGAACGCTAGCGACAGGCTTAACACATGCAAGTCGAGGGGCAGCGGGGTAGGAAGCTTGCTTTCTGCCGCCGGCGACCGGCGCACGGGTGAGTAACACGTATGCAACCTGGCCGTGACAGATGGATAACCGGGAGAAATCCCGCCTAATACAACATAATGCCGGGAGGGGACATCCCCTGCCGGCCAAAGGGGGCGACCCCGGTCACGGATGGGCATGCGGCGCATTAGGTAGTTGGTGGGGCAACGGCCCACCAAGCCGACGATGCGTAGGGGTTCTGAGAGGAAGGTCCCCCACATTGGAACTGAGACACGGTCCAA "Bacteria" "Bacteroidetes" "Bacteroidia" "Bacteroidales" "Muribaculaceae" NA …
AACGAACGCTGGCGGCGTGCTTAACACATGCAAGTCAGGGAGAAAGTCTCTTCGGGGATGATTAAACCGGCGCACGGGTGAGTAACACGTGAGTGACCTGCCTTTTAGACTGGAACAACTTACCGAAAGGTGAGCTAATGCCGGATGAGTTATATAAGTGCATGTTTATATAGGAAAAGTTGGGGAGACCTGACGCTGAAAGATGGACTCGCGTCCCATTAGCTAGTTGGTAGGGTAATGGCCTACCAAGGCGACGATGGGTAGCCGGCCTGAGAGGGTGGCCGGCCACACTGGGACTGAGACACGGCCCAG "Bacteria" "Deferribacteres" "Deferribacteres" "Deferribacterales" "Deferribacteraceae…
GATGAACGCTAGCTACAGGCTTAACACATGCAAGTCGCGGGGCAGCATGATTTTTCCCTCGGGAAAGATTGATGGCGACCGGCGCACGGGTGAGTAACGCGTATCCAACCTGCCCGTCACCACGGGATAGCCTGCCGAAAGGCAGATTAATACCGTATGTGGTCCGAAGACGGCATCAGATTCGGACTAAAGGTTCAGCGGTGACGGATGGGGATGCGTCCGATTAGGTAGTAGGCGGGGTAACGGCCCACCTAGCCATCGATCGGTAGGGGTTCTGAGAGGAAGGTCCCCCACACTGGAACTGAGACACGGTCCAG "Bacteria" "Bacteroidetes" "Bacteroidia" "Bacteroidales" "Prevotellaceae" "Prevot…
GATGAACGCTAGCGACAGGCCTAACACATGCAAGTCGAGGGGCATCGGGGCGAGGAGCAATCCTTGCCGCCGGCGACCGGCGCACGGGTGAGTAACGCGTATGCGACCTGCCCGTTGCAGGGGGATAATCGGGAGAAATCCCGTCTAATACCGCGTAATGCCGCGGGGCTGCATGGCCCTGCGGCCAAAGGGAGCGATTCCGGCAACGGATGGGCATGCGTGACATTAGCTAGTTGGCGGGGCAACGGCCCACCAAGGCGACGATGTCTAGGGGTTCTGAGAGGAAGGTCCCCCACACTGGTACTGAGACACGGACCAG "Bacteria" "Bacteroidetes" "Bacteroidia" "Bacteroidales" "Muribaculaceae" NA NA
GATGAACGCTAGCTACAGGCTTAACACATGCAAGTCGAGGGGCAGCATGAACTTAGCTTGCTAAGTTTGATGGCGACCGGCGCACGGGTGAGTAACACGTATCCAACCTGCCGATGACTCGGGGATAGCCTTTCGAAAGAAAGATTAATACCCGATGGCATAGTTCTTCCGCATGGTAGAACTATTAAAGAATTTCGGTCATCGATGGGGATGCGTTCCATTAGCTTGTTGGCGGGGTAACGGCCCACCAAGGCATCGATGGATAGGGGTTCTGAGAGGAAGGTCCCCCACATTGGAACTGAGACACGGTCCAA "Bacteria" "Bacteroidetes" "Bacteroidia" "Bacteroidales" "Bacteroidaceae" "Bacteroid…
GATGAACGCTAGCTACAGGCTTAACACATGCAAGTCGCGGGGCAGCATGGATGTCCTTTCGGGGACATCTGATGGCGACCGGCGTACGGGTGAGTAACGCGTATCCAACCTGCCCTTTACAACGGGACAGCCCGTCGAAAGGCGGATTAATACCGTATGTTGTCATGTTGATGCATATTTTCATGACCAAAGGCTTCGGCCGGTAAAGGATGGGGATGCGTCTGATTAGCTTGCCGGCGGGGTAACGGCCCACCGGGGCGACGATCAGTAGGGGTTCTGAGAGGAAGGTCCCCCACATTGGAACTGAGACACGGTCCAA "Bacteria" "Bacteroidetes" "Bacteroidia" "Bacteroidales" "Prevotellaceae" "Prev…
GATGAACGCTAGCGGCAGGCTTAACACATGCAAGTCGAGGGGCAGCGGGGAGGAAGCTTGCTTTCTCCGCCGGCGACCGGCGCACGGGTGAGTAACACGTATGCAACCTGCCCCTGTCAGGGGGACAACCCGCCGAAAGGCGGGCTAAACCCGCGTACATGCCACCGGGGCATCCCGGAGGCAGGAAAGGCTTCGGCCGGACAGGGATGGGCATGCGGCGCATTAGGCAGTAGGCGGGGTAACGGCCCACCTAACCGACGATGCGTAGGGGTTCTGAGAGGAAGGTCCCCCACACTGGTACTGAGACACGGACCAG "Bacteria" "Bacteroidetes" "Bacteroidia" "Bacteroidales" "Muribaculaceae" NA NA
GATGAACGCTAGCTACAGGCTTAACACATGCAAGTCGCGGGGCAGCATGACATCAGCTTGCTGATGTTGATGGCGACCGGCGCACGGGTGAGTAACGCGTATCCAACCTGCCCTTTACTATGGGACAGCCCGTCGAAAGGCGGATTAATACCGTATGTTGTCATGTTGATGCATATTTTCATGACCAAAGGCTTCGGCCGGTAAAGGATGGGGATGCGTCTGATTAGCTTGCCGGCGGGGTAACGGCCCACCGGGGCGACGATCAGTAGGGGTTCTGAGAGGAAGGTCCCCCACATTGGAACTGAGACACGGTCCAA "Bacteria" "Bacteroidetes" "Bacteroidia" "Bacteroidales" "Prevotellaceae" "Prevot…
ATTGAACGCTGGCGGAACGCTTTACACATGCAAGTCGAACGGTAACGAGGAGGAAAGCTTGCTTTCCTCTGTCGACGAGTGGCGAACGGGTGAGTAAGACATCGGAACGTATCCGCTCGTGGGGGACAACTTCCCGAAAGGGGAGCTAATACCGCATGAGATCCGAGGATGAAAGAGGGGGACCCGCGAGGGCCTCTCGCGAGCGGAGCGGCCGATGACTGATTAGCTAGTTGGTAAGGTAAAGGCTTACCAAGGCGACGATCAGTAGCTGGTCTGAGAGGACGACCAGCCACACTGGGACTGAGACACGGCCCAG "Bacteria" "Proteobacteria" "Gammaproteobacteria" "Betaproteobacteriales" "Burkhol…
GATGAACGCTAGCGACAGGCTTAACACATGCAAGTCGAGGGGCAGCGGGGAGGTAGCAATACTTCCGCCGGCGACCGGCGCACGGGTGAGTAACACGTATGGAACCTGCCCGTAGCAGGGGGATAAGCGGAAGAAATTCCGTCTAATACCGCGTAATAACTCCGAGAGGCATCTCCTGGGGTTTAAAGGGTAACACCGGCTACGGATGGCCATGCGGCGCATTAGCTAGTTGGCGGGGTAACGGCCCACCAAGGCGACGATGCGTAGGGGTTCTGAGAGGAAGGTCCCCCACACTGGTACTGAGACACGGACCAG "Bacteria" "Bacteroidetes" "Bacteroidia" "Bacteroidales" "Muribaculaceae" NA NA
GATGAACGCTAGCGGCAGGCTTAACACATGCAAGTCGAGGGGCATCGGGAGGGAAGCTTGCTTTCCTTGCCGGCGACCGGCGCACGGGTGAGTAACACGTATGCAACCTGCCCTCTTCAGGGGGACAACCTTCCGAAAGGGAGGCTAATCCCGCGTATATCGGTTTCGGGCATCCGAGATCGAGGAAAGATTCATCGGAAGAGGATGGGCATGCGGCGCATTAGCTAGACGGCGGGGTAACGGCCCACCGTGGCGACGATGCGTAGGGGTTCTGAGAGGAAGGTCCCCCACACTGGTACTGAGACACGGACCAG "Bacteria" "Bacteroidetes" "Bacteroidia" "Bacteroidales" "Muribaculaceae" NA NA
GATGAACGCTAGCGACAGGCCTAACACATGCAAGTCGAGGGGCATCGGGGCGAGGAGCAATCCTTGCCGCCGGCGACCGGCGCACGGGTGAGTAACGCGTATGCGACCTGCCCGTTGCAGGGGGATAATCGGGAGAAATCCCGTCTAATACCGCGTAACGCCGCGGGGCTGCATGGCCCTGCGGCCAAAGGGAGCGATTCCGGCAACGGATGGGCATGCGTGACATTAGCTAGTTGGCGGGGCAACGGCCCACCAAGGCGACGATGTCTAGGGGTTCTGAGAGGAAGGTCCCCCACACTGGTACTGAGACACGGACCAG "Bacteria" "Bacteroidetes" "Bacteroidia" "Bacteroidales" "Muribaculaceae" NA NA
GATGAACGCTAGCGACAGGCTTAACACATGCAAGTCGAGGGGCAGCGGGGCAGGAAGCTTGCTTTCTGCCGCCGGCGACCGGCGCACGGGTGAGTAACACGTATGCAACCTGGCCGTGACAGATGGATAACCGGGAGAAATCCCGCCTAATACAGCATGACGCCGGGAAGGGACATCCCTTTCCGGCCAAAGGGGGCGACTCCGGTCACGGATGGGCATGCGGCGCATTAGGTAGTTGGTGGGGCAACGGCCCACCAAGCCGACGATGCGTAGGGGTTCTGAGAGGAAGGTCCCCCACATTGGAACTGAGACACGGTCCAA "Bacteria" "Bacteroidetes" "Bacteroidia" "Bacteroidales" "Muribaculaceae" NA …
GATGAACGCTGGCGGCGTGCCTAACACATGCAAGTCGAACGGAAACATCCCGTCGATGCGATTTCGGTCAAGTCAAGGGATGTTTTAGTGGCGGACGGGTGAGTAACGCGTGGGCAACCTGCCTTACACCGGGGGATAACACTTAGAAATAGGTGCTAATACCGCATAACAGGAGAACATGCATGTGTTTTCCTTGAAAACCACGGTGGTGTAAGATGGACCCGCGTCTGATTAGCTTGTTGGCAGGGTAACGGCCTACCAAGGCGACGATCAGTAGCCGGCCTGAGAGGGTGGACGGCCACATTGGGACTGAGACACGGCCCAG "Bacteria" "Firmicutes" "Clostridia" "Clostridiales" "Lachnospiraceae" "L…
GATGAACGCTAGCGGCAGGCTTAACACATGCAAGTCGAGGGGCAGCGGGGGACGCGCTTGCGCGTCCCGCCGGCGACCGGCGCACGGGTGAGTAACACGTATGCAACCTGCCCCCGCCAGGGGTACAACCCTCCGAAAGGGGGGCTGATACCGCGTACATCCCCTGGGGGCATCCCCGGGGGAGGAAAGCCCTTTTGGGCGGGCGGGGATGGGCATGCGGCGCATTAGGAAGACGGCGGTGTGACGGACCACCGTTCCGACGATGCGTAGGGGTTCTGAGAGGAAGGCCCCCCACACTGGTACTGAGACACGGACCAG "Bacteria" "Bacteroidetes" "Bacteroidia" "Bacteroidales" "Muribaculaceae" NA NA
GATGAACGCTAGCTACAGGCTTAACACATGCAAGTCGAGGGGCAGCATGAAAGTTTGCTTGCAAACTTTTGATGGCGACCGGCGCACGGGTGAGTAACACGTATCCAACCTGCCTCATACTCGGGGATAGCCTTTCGAAAGAAAGATTAATACCCGATGTCATAGTCCTACCGCATGATGGGATTATTAAAGAATTTCGGTATGGGATGGGGATGCGTTCCATTAGTTAGTTGGCGGGGTAACGGCCCACCAAGACAACGATGGATAGGGGTTCTGAGAGGAAGGTCCCCCACATTGGAACTGAGACACGGTCCAA "Bacteria" "Bacteroidetes" "Bacteroidia" "Bacteroidales" "Bacteroidaceae" "Bactero…
GATGAACGCTAGCGACAGGCTTAACACATGCAAGTCGAGGGGCAGCGGTGGTGAAGGCTTGCCTTCACCAGCCGGCGACCGGCGCACGGGTGAGTAACACGTATGCAACCTGCCTGCCACAGCCGGATAATCGGGAGAAATCCCGTCTAATACGGCATAATGCATCGACGGGACATCCTGTTGGTGCCAAAGGTTAATTCCGGTGGCGGATGGGCATGCGTCGCATTAGTTAGTTGGCGGTGTAACGGACCACCAAGACGACGATGCGTAGGGGTTCTGAGAGGAAGGTCCCCCACACTGGTACTGAGACACGGACCAG "Bacteria" "Bacteroidetes" "Bacteroidia" "Bacteroidales" "Muribaculaceae" NA NA
GATGAACGCTAGCGGCAGGCTTAACACATGCAAGTCGAGGGGCAGCATGGGAGTAGCAATACTTCTGATGGCGACCGGCGCACGGGTGCGTAACGCGTATGCAACCTACCTGTAACAGGGGGATAACACTGAGAAATCGGTACTAATACCGCATAACACTGTGAGAGGCATCTCTTGTGGTTGAAAGTTTCGGCGGTTACAGATGGGCATGCGTTGTATTAGCTGGTTGGTAAGGTAACGGCTTACCAAGGCGACGATACATAGGGGGACTGAGAGGTTAACCCCCCACATTGGTACTGAGACACGGACCAA "Bacteria" "Bacteroidetes" "Bacteroidia" "Bacteroidales" "Rikenellaceae" "Alistipes" NA
GATGAACGCTAGCGACAGGCCTAACACATGCAAGTCGAGGGGCATCGGGGCGAGGAGCAATCCTTGCCGCCGGCGACCGGCGCACGGGTGAGTAACGCGTATGCGACCTGCCCGTTGCAGGGGGATAATCGGGAGAAATCCCGTCTAATACCGCGTAATGCCGCGGGGCTGCATGGCCCTGCGGCCAAAGGAAGCGATTCCGGCAACGGATGGGCATGCGTGACATTAGCTAGTTGGCGGGGCAACGGCCCACCAAGGCGACGATGTCTAGGGGTTCTGAGAGGAAGGTCCCCCACACTGGTACTGAAACACGGACCAG "Bacteria" "Bacteroidetes" "Bacteroidia" "Bacteroidales" "Muribaculaceae" NA NA
GATGAACGCTAGCGGCAGGCTTAACACATGCAAGTCGAGGGGCAGCGAGGCCGTAGCAATACGGCTGTCGGCGACCGGCGCACGGGTGCGTAACGCGTATGCAACCTACCCGTAACAGGGGGATAACACTGAGAAATTGGTACTAATACCCCATAATATCTCGGAAGGCATCTTCTGGGGTTGAAAACTCTGGTGGTTACGGATGGGCATGCGTTGTATTAGCTAGTTGGTAAGGTAACGGCTTACCAAGGCGACGATACATAGGGGGACTGAGAGGTTAACCCCCCACATTGGTACTGAGACACGGACCAA "Bacteria" "Bacteroidetes" "Bacteroidia" "Bacteroidales" "Rikenellaceae" "Alistipes" NA
AACGAACGCTGGCGGCAGGCTTAACACATGCAAGTTGAACGGTATTTGTATGGTGCTTGCACTAGACAAAGAGAGTAGCGCACTGGTGAGTAACACGTGGGAACGTACCTTGAAGTGGGGAATAGCGTCTGGAAACGGACGATAATACCGCATAATCCCTGAGGGGGAAAGATTTATCGCTTTAAGAACGGCCCGCGGAAGATTAGGTAGTTGGTGGGGTAAAGGCCTACCAAGCCTACGATCTATAGCTGGTCTGAGAGGACGATCAGCCACATTGGAACTGAGACACGGTCCAA "Bacteria" "Proteobacteria" "Alphaproteobacteria" "Rhodospirillales" NA NA NA
GATGAACGCTAGCGACAGGCTTAACACATGCAAGTCGAGGGGCAGCGGGGGAGGAAGCTTGCTTTCTCCTGCCGGCGACCGGCGCACGGGTGAGTAACACGTATGCAACCTGGCCGTCACAGGTGGATAACCGGAAGAAATTCCGACTAATACAGCATAACACTCCTGAGGGACATCCTTCGGGAGTCAAAGGAGGCGACTCCGGTGACGGATGGGCATGCGGCGCATTAGGTAGTTGGTAGGGTAACGGCCTACCAAGCCGACGATGCGTAGGGGTTCTGAGAGGAAGGTCCCCCACATTGGAACTGAGACACGGTCCAA "Bacteria" "Bacteroidetes" "Bacteroidia" "Bacteroidales" "Muribaculaceae" NA …
GATGAACGCTAGCTACAGGCTTAACACATGCAAGTCGAGGGGCAGCATGAAAGTTTGCTTGCAAACTTTTGATGGCGACCGGCGCACGGGTGAGTAACACGTATCCAACCTGCCTCATACTCGGGGATAGCCTTTCGAAAGAAAGATTAATACCCGATGTCATAGTCCTACCGCATGATGGGATTATTAAAGAATTTCGGTATGGGATGGGGATGCGTTCCATTAGTTAGTTGGCGGGGTAACGGCCCACCAAGACGACGATGGATAGGGGTTCTGAGAGGAAGGTCCCCCACATTGGAACTGAGACACGGTCCAA "Bacteria" "Bacteroidetes" "Bacteroidia" "Bacteroidales" "Bacteroidaceae" "Bactero…
GATGAACGCTAGCGACAGGCTTAACACATGCAAGTCGAGGGGCAGCGGGGGCGAAGCTTGCTTCGCCTGCCGGCGACCGGCGCACGGGTGAGTAACACGTATGCGACCTGCCCCCCGCAGGGGGATAACCGGGAGAAATCCCGACTAATACCGCGTAACGCCGCGGGGCTGCATGGCCCGGCGGCCAAAGGAAGCGATTCCGGCGGGGGATGGGCATGCGGCGCATTAGCTAGTCGGCGGGGTAACGGCCCACCGAGGCGACGATGCGTAGGGGTTCTGAGAGGAAGGTCCCCCACACTGGTACTGAGACACGGACCAG "Bacteria" "Bacteroidetes" "Bacteroidia" "Bacteroidales" "Muribaculaceae" NA NA
GATGAACGCTAGCGACAGGCTTAACACATGCAAGTCGAGGGGCAGCGGGGAGGTAGCAATACTTCCGCCGGCGACCGGCGCACGGGTGAGTAACACGTATGGAACCTGCCCGTAGCAGGGGGATAAGCGGAAGAAATTCCGTCTAATACCGCGTAATAACTCCGAGAGGCATCTCATGGAGTTTAAAGGGTAACACCGGCTACGGATGGCCATGCGGCGCATTAGCTAGTTGGCGGGGTAACGGCCCACCAAGGCGACGATGCGTAGGGGTTCTGAGAGGAAGGTCCCCCACACTGGTACTGAGACACGGACCAG "Bacteria" "Bacteroidetes" "Bacteroidia" "Bacteroidales" "Muribaculaceae" NA NA
GATGAACGCTAGCGACAGGCTTAACACATGCAAGTCGAGGGGCAGCGGGGAGGCAGCGATGCCTCCGCCGGCGACCGGCGCACGGGTGAGTAACACGTATGAAACCTGCCCGGAGCAGGGGGATAAGCGGAAGAAATTCCGTCTAATACCGCGTAATGAGGCGGGGAGGCATCTCCCCGCTTCCAAAGATTTATCGGCTCCGGATGGTCATGCGGCGCATTAGCTGGTTGGCGGGGTAACGGCCCACCAAGGCGACGATGCGTAGGGGTTCTGAGAGGAAGGCCCCCCACACTGGTACTGAGACACGGACCAG "Bacteria" "Bacteroidetes" "Bacteroidia" "Bacteroidales" "Muribaculaceae" NA NA
GATGAACGCTAGCGACAGGCTTAACACATGCAAGTCGAGGGGCAGCGGGGAGGCAGCAATGCCTCCGCCGGCGACCGGCGCACGGGTGAGTAACACGTATGAAACCTGCCCGGAGCAGGGGGATAAGCGGAAGAAATTCCGTCTAATACCGCGTAACGAGGCGGGGAGGCATCTCCCCGCTTCCAAAGATTTATCGGCTCCGGATGGTCATGCGGCGCATTAGCTAGTTGGCGGGGTAACGGCCCACCAAGGCGACGATGCGTAGGGGTTCTGAGAGGAAGGCCCCCCACACTGGTACTGAGACACGGACCAG "Bacteria" "Bacteroidetes" "Bacteroidia" "Bacteroidales" "Muribaculaceae" NA NA
GATGAACGCTGGCGGCGTGCCTAACACATGCAAGTCGAACGGGGTCTTAGTGCGGAAGTTTTCGGATGGAAGGATTAAGACTTAGTGGCGGACGGGTGAGTAACGCGTGGGTAACCTGCCCTGTACAGGGGGATAACAGTTGGAAACGGCTGCTAAAACCGCATAACATGGAGATACCGCATGATATTTCCATCAAATATTTATAGGTACAGGATGGGCCCGCGTCTGATTAGCCAGTTGGCAGGGTAATGGCCTACCAAAGCGACGATCAGTAGCCGGCTTGAGAGAGTGACCGGCCACATTGGGACTGAGACACGGCCCAA "Bacteria" "Firmicutes" "Clostridia" "Clostridiales" "Lachnospiraceae" "Lac…
GATGAACGCTGGCGGCGTGCTTAACACATGCAAGTCGAACGGGCTCATATTGAAACCTAGTGATGTATGAGTTAGTGGCGGACGGGTGAGTAACGCGTGGAGAACCTGCCGTATACTGGGGGATAACACTTAGAAATAGGTGCTAATACCGCATAAGCGCACAGCTTCGCATGAAGCAGTGTGAAAAACTCCGGTGGTATACGATGGATCCGCGTCTGATTAGCTGGTTGGCGGGGTAACAGCCCACCAAGGCGACGATCAGTAGCCGGCCTGAGAGGGTGAACGGCCACATTGGGACTGAGACACGGCCCAA "Bacteria" "Firmicutes" "Clostridia" "Clostridiales" "Lachnospiraceae" "Lachnospirace…
GATGAACGCTGGCGGCGTGCTTAACACATGCAAGTCGAACGGACTTATATTGAAACCTAGTGATATATAAGTTAGTGGCGGACGGGTGAGTAACGCGTGGAGAACCTGCCCTGCACAGGGGGATAACACTTAGAAATAGGTGCTAAGACCGCATAAGCGCACGGGACCGCATGGTACAGTGTGAAAAATGGAAACATGGTGCAGGATGGCTCCGCGTCTGATTAGCTGGTTGGCGGGGTAACGGCCCACCAAGGCGACGATCAGTAGCCGGCCTGAGAGGGTGACCGGCCACATTGGGACTGAGACACGGCCCAA "Bacteria" "Firmicutes" "Clostridia" "Clostridiales" "Lachnospiraceae" "Lachnospira…
GATGAACGCTGGCGGCGTGCTTAACACATGCAAGTCGAACGGAGATTATACGCAGAGGCGATTTCGGTCAAATCATGTGTAATCTTAGTGGCGGACGGGTGAGTAACGCGTGGGTAACCTGCCTTACACTGGGGGATAACACTTAGAAATAGGTGCTAATACCGCATAAGCGCACGAAGCCGCATGGATTTGTGTGAAAAACTCCGGTGGTGTAAGATGGACCCGCGTCTGATTAGCTTGTTGGCGGGGTAACGGCCCACCAAGGCGACGATCAGTAGCCGGCCTGAGAGGGTGGACGGCCACATTGGGACTGAGACACGGCCCAA "Bacteria" "Firmicutes" "Clostridia" "Clostridiales" "Lachnospiraceae" "…
GATGAACGCTAGCGACAGGCTTAACACATGCAAGTCGAGGGGCAGCGGGGCGGCAGGCTTGCCTGCCGCCGCCGGCGACCGGCGCACGGGTGAGTAACACGTATGCAACCTGCCCGTGGCAGGGGGATAAGCGGGGGAAACCCCGTCTAATACCGCGTAACGCGGCCTAGGGACATCCCAAGGCCGCCAAAGGGAGCAATCCCGGCCACGGATGGGCATGCGGCGCATTAGCTAGTCGGCGGGGTAACGGCCCACCGAGGCGACGATGCGTAGGGGTTCTGAGAGGAAGGCCCCCCACACTGGTACTGAGACACGGACCAG "Bacteria" "Bacteroidetes" "Bacteroidia" "Bacteroidales" "Muribaculaceae" NA …
GACGAACGCTGGCGGCGTGCCTAATACATGCAAGTCGAGCGAGCTTGCCTAGATGATTTTAGTGCTTGCACTAAATGAAACTAGATACAAGCGAGCGGCGGACGGGTGAGTAACACGTGGGTAACCTGCCCAAGAGACTGGGATAACACCTGGAAACAGATGCTAATACCGGATAACAACACTAGACGCATGTCTAGAGTTTGAAAGATGGTTCTGCTATCACTCTTGGATGGACCTGCGGTGCATTAGCTAGTTGGTAAGGTAACGGCTTACCAAGGCAATGATGCATAGCCGAGTTGAGAGACTGATCGGCCACATTGGGACTGAGACACGGCCCAA "Bacteria" "Firmicutes" "Bacilli" "Lactobacillales" "Lactob…
GATGAACGCTAGCGACAGGCTTAACACATGCAAGTCGAGGGGCAGCGGGGAGGTAGCAATACTTCCGCCGGCGACCGGCGCACGGGTGAGTAACACGTATGGAACCTGCCCGTAGCAGGGGGATAAGCGGAAGAAATTCCGTCTAATACCGCGTAATAATTCCGAGAGGCATCTCATGGAGTTTAAAGGGTAACACCGGCTACGGATGGCCATGCGGCGCATTAGCTAGTTGGCGGGGTAACGGCCCACCAAGGCGACGATGCGTAGGGGTTCTGAGAGGAAGGTCCCCCACACTGGTACTGAGACACGGACCAG "Bacteria" "Bacteroidetes" "Bacteroidia" "Bacteroidales" "Muribaculaceae" NA NA
GATGAACGCTGGCGGCGTGCTTAACACATGCAAGTCGAACGGACTCATATTGAAACCTAGTGATTTATGAGTTAGTGGCGGACGGGTGAGTAACGCGTGGATAACCTGCCGTATACCGGGGGATAACACTTAGAAATAGGTGCTAATACCGCATAAGCGCACGGCTCCGCATGGGGCAGTGTGAAAAACTCCGGTGGTATACGATGGATCCGCGTCTGATTAGCTAGTTGGCGGGGTAACGGCCCACCAAGGCAGCGATCAGTAGCCGGCCTGAGAGGGTGGACGGCCACATTGGGACTGAGACACGGCCCAA "Bacteria" "Firmicutes" "Clostridia" "Clostridiales" "Lachnospiraceae" "Lachnospirace…
GATGAACGCTAGCGACAGGCTTAACACATGCAAGTCGAGGGGCAGCGGGGCGGCAGGCTTGCCTGCCGCCGCCGGCGACCGGCGCACGGGTGAGTAACACGTATGCAACCTGCCCGTGGCAGGGGGATAAGCGGGGGAAACCCCGTCTAATACCGCGTAACGCGGCCTTGGGGCATCCCCGGGCCGCCAAAGGGAGCAATCCCGGCCACGGATGGGCATGCGGCGCATTAGCTAGTCGGCGGGGTAACGGCCCACCGAGGCGACGATGCGTAGGGGTTCTGAGAGGAAGGCCCCCCACACTGGTACTGAGACACGGACCAG "Bacteria" "Bacteroidetes" "Bacteroidia" "Bacteroidales" "Muribaculaceae" NA …
GATGAACGCTGGCGGCGTGCTTAACACATGCAAGTCGAACGGACTCATATTGAAACCTAGTGAAGTATGAGTTAGTGGCGGACGGGTGAGTAACGCGTGGAAAACCTGCCGTATACTGGGGGATAACACTTAGAAATAGGTGCTAATACCGCATAAGCGCACAGCTTCGCATGAAGCGGTGTGAAAAACTCTGGTGGTATACGATGGTTCCGCGTCTGATTAGCTAGTTGGTGGGGTAATGGCCTACCAAGGCAACGATCAGTAGCCGGCCTGAGAGGGTGAACGGCCACATTGGGACTGAGACACGGCCCAA "Bacteria" "Firmicutes" "Clostridia" "Clostridiales" "Lachnospiraceae" "Lachnospirace…
GATGAACGCTGGCGGCGTGCCTAACACATGCAAGTCGAACGGAGCCTTAACCAAAGAAGCAGCCAGCTTGCTGGAAGCGGAAAAGGGAAAGGCTTAGTGGCGGACGGGTGAGTAACGCGTGGGTAACCTGGCCCATACAGGGGGATAACACTTAGAAATAGGTGCTAATACCGCATAACAACAGAAAGCGCATGCTTTTTGTTTGAAAACCAAGGTGGTATGGGATGGACCCGCGTCTGATTAGCTGGTTGGCGGGGTAAAGGCCCACCAAGGCGACGATCAGTAGCCGGCCTGAGAGGGTGGACGGCCACATTGGGACTGAGACACGGCCCAA "Bacteria" "Firmicutes" "Clostridia" "Clostridiales" "Lachnospir…
ATTGAACGCTGGCGGAACGCTTTACACATGCAAGTCGAACGGTAACGAGGAGGAAAGCTTGCTTTCCTCCGTCGACGAGTGGCGAACGGGTGAGTAAGACATCGGAACGTATCCGCTCGTGGGGGACAACTTCCCGAAAGGGGAGCTAATACCGCATGAGATCCGAGGATGAAAGAGGGGGACCCGCGAGGGCCTCTCGCGAGCGGAGCGGCCGATGACTGATTAGCTAGTTGGTAAGGTAAAGGCTTACCAAGGCGACGATCAGTAGCTGGTCTGAGAGGACGACCAGCCACACTGGGACTGAGACACGGCCCAG "Bacteria" "Proteobacteria" "Gammaproteobacteria" "Betaproteobacteriales" "Burkhol…
GATGAACGCTAGCGACAGGCTTAACACATGCAAGTCGAGGGGCAGCGGGGAGCAAGCTTGCTTGCTCTGCCGGCGACCGGCGCACGGGTGAGTAACACGTATGCAACCTGCCCTCCGCAGGGGGATAACCCGGAGAAATCCGGACTAATACCGCGTGGTACATCTGTGGGGCATCCCACGGGTGTTAAAAGGAAGCGATTCCGGCGGAGGATGGGCATGCGGCGCATTAGCTAGTTGGCGGGGTAACGGCCCACCAAGGCGACGATGCGTAGGGGTTCTGAGAGGAAGGTCCCCCACACTGGTACTGAGACACGGACCAG "Bacteria" "Bacteroidetes" "Bacteroidia" "Bacteroidales" "Muribaculaceae" NA NA
GATGAACGCTAGCGACAGGCCTAACACATGCAAGTCGAGGGGCATCGGGGAGCGAAGCTTGCTTTGCTCCGCCGGCGACCGGCGCACGGGTGAGTAACGCGTATGCAACCTGCCCGTTTCAGCGGGATAACCCGGAGAAATCCGGCCTAATACCGCATGTGGCCGAGGGGAGGCATCTTCTTTCGGCCAAAGGAGGCGACTCCGGAGACGGATGGGCATGCGTGACATTAGCTTGTTGGCGGGGTAACGGCCCACCAAGGCGACGATGTCTAGGGGTTCTGAGAGGAAGGTCCCCCACACTGGTACTGAGACACGGACCAG "Bacteria" "Bacteroidetes" "Bacteroidia" "Bacteroidales" "Muribaculaceae" "Mu…
GATGAACGCTAGCGACAGGCTTAACACATGCAAGTCGAGGGGCAGCGGGGGCGGAAGCTTGCTTTCGCCCGCCGGCGACCGGCGCACGGGTGAGTAACACGTATGCAACCTGGCCGCCACAGGGGGATAACCCGCGGAAACGCGGCCTAATACCCCGTGACGCCACCGGAGGGCATCCTCCGGTGGCCAAAGGAGCGATCCGGTGGCGGATGGGCATGCGGCGCATTAGCTAGACGGCGGGGTGACGGCCCACCGTGGCGACGATGCGTAGGGGTTCTGAGAGGAAGGCCCCCCACACTGGGACTGAGACACGGCCCAG "Bacteria" "Bacteroidetes" "Bacteroidia" "Bacteroidales" "Muribaculaceae" NA NA
GATGAACGCTGGCGGCGTGCTTAACACATGCAAGTCGAACGAAGCATAGGAGTGGAATTTTTCGGAAGGAAACAACTATGACTGAGTGGCGGACGGGTGAGTAACGCGTGGGTAACCTGCCTCATACAGGGGGATAACAGTTAGAAATGACTGCTAATACCGCATAAGCGCACAAAACCGCATGGTTTGGTGTGAAAAACTGAGGTGGTATGAGATGGACCCGCGTCTGATTAGCTAGTTGGAGAGGTAACGGCTCACCAAGGCAACGATCAGTAGCCGACCTGAGAGGGTGACCGGCCACATTGGGACTGAGACACGGCCCAA "Bacteria" "Firmicutes" "Clostridia" "Clostridiales" "Lachnospiraceae" NA …
GATGAACGCTGGCGGCGTGCCTAACACATGCAAGTCGAACGGGGTCTTAGTACGGAAGTTTTCGGATGGAAGGATTAAGACTTAGTGGCGGACGGGTGAGTAACGCGTGGGTAACCTGCCCTGTACAGGGGGATAACAGTTGGAAACGGCTGCTAAAACCGCATAACATGGAGATACCGCATGATATTTCCATCAAATATTTATAGGTACAGGATGGGCCCGCGTCTGATTAGCCAGTTGGCAGGGTAATGGCCTACCAAAGCGACGATCAGTAGCCGGCTTGAGAGAGTGACCGGCCACATTGGGACTGAGACACGGCCCAA "Bacteria" "Firmicutes" "Clostridia" "Clostridiales" "Lachnospiraceae" "Lac…
GATGAACGCTAGCGACAGGCTTAACACATGCAAGTCGAGGGGCAGCGGGGGAGCAGCAATGCTCCCGCCGGCGACCGGCGCACGGGTGAGTAACACGTATGGAACCTGCCCGCAGCAGGGGGATAAGCGGAAGAAATTCCGTCTAATACCGCGTAACACCGCGGAGGGGCATCCCTCGGCGGTTAAAGATTCATCGGCTGCGGATGGCCATGCGGCGCATTAGCTAGTCGGCGGGGTAACGGCCCACCGAGGCGACGATGCGTAGGGGTTCTGAGAGGAAGGTCCCCCACACTGGTACTGAGACACGGACCAG "Bacteria" "Bacteroidetes" "Bacteroidia" "Bacteroidales" "Muribaculaceae" NA NA
GATGAACGCTAGCTACAGGCTTAACACATGCAAGTCGAGGGGCAGCATGGGAGTTTGCTTGCAAACTTCCGATGGCGACCGGCGCACGGGTGAGTAACACGTATCCAACCTGCCGATAACTCGGGGATAGCCTTTCGAAAGAAAGATTAATATCCGATAGGATATCAAGGTCGCATGATCTTGATATTAAAGAATTTCGGTTATCGATGGGGATGCGTTCCATTAGTTAGTTGGCGGGGTAACGGCCCACCAAGACGACGATGGATAGGGGTTCTGAGAGGAAGGTCCCCCACATTGGAACTGAGACACGGTCCAA "Bacteria" "Bacteroidetes" "Bacteroidia" "Bacteroidales" "Bacteroidaceae" "Bactero…
GATGAACGCTAGCGGCAGGCTTAACACATGCAAGTCGAGGGGCAGCGGGGGACGCGCTTGCGCGTCCCGCCGGCGACCGGCGCACGGGTGAGTAACACGTATGCAACCTGCCCCCGCCAGGGGTACAACCCTCCGAAAGGGGGGCTGATACCGCGTACATCCCTTGGGGGCATCCCCGGGGGAGGAAAGCCCTTTTGGGCGGGCGGGGATGGGCATGCGGCGCATTAGGAAGACGGCGGTGTGACGGACCACCGTTCCGACGATGCGTAGGGGTTCTGAGAGGAAGGCCCCCCACACTGGTACTGAGACACGGACCAG "Bacteria" "Bacteroidetes" "Bacteroidia" "Bacteroidales" "Muribaculaceae" NA NA
GATGAACGCTAGCGGCAGGCTTAACACATGCAAGTCGAAGGGCATCGGGAGGAGTGCTTGCACTCCTTGCCGGCGACTGGCGCACGGGTGAGTAACACGTATGCAACCTGCCCTCTTCAGGGGGACAACCTTCCGAAAGGGAGGCTAATCCCGCGTATATCTTTTGGAGGCATCTCCGGAAGAGGAAAGCTTATGCGGAAGAGGATGGGCATGCGGCGCATTAGCTTGACGGCGGGGTAACGGCCCACCGTGGCGACGATGCGTAGGGGTTCTGAGAGGAAGGTCCCCCACACTGGTACTGAGACACGGACCAG "Bacteria" "Bacteroidetes" "Bacteroidia" "Bacteroidales" "Muribaculaceae" NA NA
GATGAACGCTGGCGGCGTGCTTAACACATGCAAGTCGAACGGACTTATATTGAAACCTAGTGATATATAAGTTAGTGGCGGACGGGTGAGTAACGCGTGGAGAACCTGCCCTGCACAGGGGGATAACACTTAGAAATAGGTGCTAAGACCGCATAAGCGCACGGGACCGCATGGTGCAGTGTGAAAAATGGAAACATGGTGCAGGATGGCTCCGCGTCTGATTAGCTGGTTGGCGGGGTAACGGCCCACCAAGGCGACGATCAGTAGCCGGCCTGAGAGGGTGACCGGCCACATTGGGACTGAGACACGGCCCAA "Bacteria" "Firmicutes" "Clostridia" "Clostridiales" "Lachnospiraceae" "Lachnospira…
GATGAACGCTAGCGACAGGCTTAACACATGCAAGTCGAGGGGCAGCGGGGGAGGAAGCTTGCTTTCTCCTGCCGGCGACCGGCGCACGGGTGAGTAACACGTATGCAACCTGGCCGTCACAGGTGGATAACCGGAAGAAATTCCGACTAATACAGCATAACACTCCTGAGGGACATCCTTCGGGAGTCAAAGGAGGTAACTCCGGTGACGGATGGGCATGCGGCGCATTAGGTAGTTGGTAGGGTAACGGCCTACCAAGCCGACGATGCGTAGGGGTTCTGAGAGGAAGGTCCCCCACATTGGAACTGAGACACGGTCCAA "Bacteria" "Bacteroidetes" "Bacteroidia" "Bacteroidales" "Muribaculaceae" NA …
GATGAACGCTAGCGGCAGGCCTAACACATGCAAGTCGAGGGGCAGCGGGTAAGTAGCTTGCTACTTATGCCGGCGACCGGCGGACGGGTGCGTAACGCGTATGTAACCTACCTTTGACAGGGGGATAACATCGAGAAATTGGTACTAATACCCCATAACATCACCGGAGGCATCTTCGGTGGTTGAAAACTCAGGTGGTCAGAGATGGACATGCGTTGTATTAGCTAGTTGGTGAGGTAACGGCTCACCAAGGCGACGATACATAGGGGGACTGAGAGGTCAACCCCCCACATTGGTACTGAGACACGGACCAA "Bacteria" "Bacteroidetes" "Bacteroidia" "Bacteroidales" "Rikenellaceae" "Alistipes"…
GATGAATGCTGGCGGCGTGCCTAATACATGCAAGTCGAGCGGTAGCAGGGCTTCACCGTTCTCTTGTCGCACTTGGCCTTTGAGCAAGTGACTGATACGAGGGAACAGTGAAGCTGCTGACGAGCGGCGGACGGCTGAGTAACGCGTGGGAACATACCCCAAACTGAGGGATAACTACTCGAAAGAGTGGCTAATACCGCATGTGATCTTCGGATTAAAGGATTTATCCGGTTTGGGAATGGCCTGCGTACGATTAGATAGTTGGTGAGGTAAAGGCTCACCAAGTCGACGATCGTTAGATGGTTTGAGAGGATGATCATCCAGACTGGGACTGAGACACGGCCCAG "Bacteria" "Patescibacteria" "Saccharimonadia" "Sac…
ATTGAACGCTGGCGGCGTGCTTAACACATGCAAGTCGAACGCGAAAGGGGGCTTCGGCTCCCGAGTAGAGTGGCGCACGGGTGAGTAACGCGTGGATAATCTGCCCTCTTGTTCGGGATAACTGCTGGAAACGGCAGCTAATACCGGATAAGCTCCCCCAATTGTTTGGGGGAGGAAAGGAGGCCTCTTCATGAAAGCTTCCGCGAGGGGATGAGTCCGCGTCCCATTAGCTAGTTGGTGAGGTAACGGCCCACCAAGGCAACGATGGGTAGCCGGTCTAAGAGGATGACCGGCCACACTGGAACTGAAACACGGTCCAG "Bacteria" "Proteobacteria" "Deltaproteobacteria" "Desulfovibrionales" "Desulf…
GATGAACGCTGGCGGCGTGCTTAACACATGCAAGTCGAACGGGAATGCCACGCTGATGCGATTTCGGTCAAATCATGTGGCATTCGAGTGGCGGACGGGTGAGTAACGCGTGGGTAACCTGCCTTACACAGGGGGATAACACCTGGAAACAGGTGCTAATACCGCATAAGCGCACAGGGCCGCATGGCCCGGTGTGAAAAACTCCGGTGGTGTAAGATGGACCCGCGTCTGATTAGCTTGTTGGCGGGGTAGGGGCCCACCAAGGCGACGATCAGTAGCCGGCCTGAGAGGGTGGACGGCCACATTGGGACTGAGACACGGCCCAA "Bacteria" "Firmicutes" "Clostridia" "Clostridiales" "Lachnospiraceae" "…
GATGAACGCTAGCGACAGGCTTAACACATGCAAGTCGAGGGGCAGCGGGGGAGCAGCAATGCTCCCGCCGGCGACCGGCGCACGGGTGAGTAACACGTATGGAACCTGCCCGCAGCAGGGGGATAAGCGGAAGAAATTCCGTCTAATACCGCGTAACACCGCAGAGGGGCATCCCTCGGCGGTTAAAGATTCATCGGCTGCGGATGGCCATGCGGCGCATTAGCTAGTCGGCGGGGTAACGGCCCACCGAGGCGACGATGCGTAGGGGTTCTGAGAGGAAGGTCCCCCACACTGGTACTGAGACACGGACCAG "Bacteria" "Bacteroidetes" "Bacteroidia" "Bacteroidales" "Muribaculaceae" NA NA
GATGAACGCTGGCGGCGTGCTTAACACATGCAAGTCGAACGGGCTCATATTGAAACCTAGTGAAGTATGAGTTAGTGGCGGACGGGTGAGTAACGCGTGGAAAACCTGCCGTATACTGGGGGATAACACTTAGAAATAGGTGCTAATACCGCATAAGCGCACAGCTTCGCATGAAGCGGTGTGAAAAACTCTGGTGGTATACGATGGTTCCGCGTCTGATTAGCTAGTTGGTGGGGTAATGGCCTACCAAGGCAACGATCAGTAGCCGGCCTGAGAGGGTGAACGGCCACATTGGGACTGAGACACGGCCCAA "Bacteria" "Firmicutes" "Clostridia" "Clostridiales" "Lachnospiraceae" "Lachnospirace…
GATGAACGCTGGCGGCGTGCTTAACACATGCAAGTCGAACGGACTCATATTGAAACCTAGTGATGTATGAGTTAGTGGCGGACGGGTGAGTAACGCGTGGAGAACCTGCCGTATACTGGGGGATAACACTTAGAAATAGGTGCTAATACCGCATAAGCGCACAGCTTCGCATGAAGCAGTGTGAAAAACTCCGGTGGTATACGATGGATCCGCGTCTGATTAGCTTGTTGGCGGGGTAAAGGCCCACCAAGGCGACGATCAGTAGCCGGCCTGAGAGGGTGAACGGCCACATTGGGACTGAGACACGGCCCAA "Bacteria" "Firmicutes" "Clostridia" "Clostridiales" "Lachnospiraceae" "Lachnospirace…
GATGAACGCTGGCGGCGTGCTTAACACATGCAAGTCGAACGAGAACCATTGGATCGAGGATTCGTCCAAGTGAAGGTGGGGAAAGTGGCGGACGGGTGAGTAACGCGTGAGCAATCTGCCTTGGAGTGGGGAATAACGGCTGGAAACAGCCGCTAATACCGCATGATACAGCTGGGAGGCATCTCCCTGGCTGTCAAAGATTTATCGCTCTGAGATGAGCTCGCGTCTGATTAGCTAGTTGGCGGGGTAACGGCCCACCAAGGCGACGATCAGTAGCCGGACTGAGAGGTTGGCCGGCCACATTGGGACTGAGACACGGCCCAG "Bacteria" "Firmicutes" "Clostridia" "Clostridiales" "Ruminococcaceae" NA …
GACGAACGCTGGCGGCACGCTTAACACATGCAAGTCGAACGGACTTGAGAGGGCTTGCTCTCTTAAGTTAGTGGCGGACGGGTGAGTAACACGTGAGCAACCTGCCTTTAAGAGTGGGATAACGGTCGGAAACGACCGCTAATACCGCATAACATACACGAACCGCATGGTTTGTGTATCAAAGATTTATCGCTTAAAGATGGGCTCGCGTCTGATTAGCTTGTTGGTGAGGTAACGGCTCACCAAGGCGACGATCAGTAGCCGTACTGAGAGGTAGAACGGCCACATTGGGACTGAGACACGGCCCAG "Bacteria" "Firmicutes" "Clostridia" "Clostridiales" "Ruminococcaceae" "Ruminococcus_1" NA
GATGAACGCTAGCGGCAGGCTTAACACATGCAAGTCGAAGGGCATCGGGAGGAGTGCTTGCACTCCTTGCCGGCGACTGGCGCACGGGTGAGTAACACGTATGCAACCTGCCCTCTTCAGGGGGACAACCTTCCGAAAGGGAGGCTAATCCCGCGTATATCTTTTGGAGGCATCTCCGGAAGAGGAAAGCTTATGCGGAAGAGGATGGGCATGCGGCGCATTAGCTAGACGGCGGGGTAACGGCCCACCGTGGCGACGATGCGTAGGGGTTCTGAGAGGAAGGTCCCCCACACTGGTACTGAGACACGGACCAG "Bacteria" "Bacteroidetes" "Bacteroidia" "Bacteroidales" "Muribaculaceae" NA NA
GATGAACGCTGGCGGCGTGCCTAACACATGCAAGTCGAACGGGATAAGAGATGCTTGCATTTCTTATCAAGTGGCGGACGGGTGAGTAACGCGTGGATAATCTGCCCTACACAGGGGGATAACAGCCGGAAACGGCTGCTAATACCGCATAGACTGTATTCTCGCATGAGAGAACAGGGAAAGATTTATCGGTGTAGGATGAATCCGCGTCCGATTAGCTAGTTGGAGGGGTAACGGCCCACCAAGGCGACGATCGGTAGCCGGCCTGAGAGGGCGACCGGCCACATTGGGACTGAGACACGGCCCAG "Bacteria" "Firmicutes" "Clostridia" "Clostridiales" NA NA NA
GATGAACGCTGGCGGCGTGCTTAACACATGCAAGTCGAACGGAGATAAACGGCGAAGAGATTTCGGTCGATTCCTGTTTATCTTAGTGGCGGACGGGTGAGTAACGCGTGGGTAACCTGCCCTGTACAGGGGGATAACACTTAGAAATAGGTGCTAAAACCGCATAAGCGCACAGTACCGCATGGTACAGTGTGAAAAACTCCGGTGGTACAGGATGGACCCGCGTCTGATTAGCTGGTTGGAGGGGTAACGGCCCACCAAGGCGACGATCAGTAGCCGGCCTGAGAGGGTGAACGGCCACATTGGGACTGAGACACGGCCCAA "Bacteria" "Firmicutes" "Clostridia" "Clostridiales" "Lachnospiraceae" "La…
GATAAACGCTGGCGGCGCACATAAGACATGCAAGTCGAACGAACTTAATCGAAAGTTTACTTTTGAAGCGGTTAGTGGCGGACTGGTGAGTAACGCGTAAGTAATCTGCCTATCAGAGGGGAATAACAGTGAGAAATCATTGCTAATACCGCATATACTAATTTTATCGCATGATAGAATTGGGAAAGGAGCAATCCGCTGATAGATGGGCTTGCGTCTGATTAGTTAGTTGGTAGGGTAAAGGCCTACCAAGACGATGATCAGTAGCCGGACTGAGAGGTTGAACGGCCACATTGGGACTGAGATACGGCCCAG "Bacteria" "Firmicutes" "Clostridia" "Clostridiales" "Ruminococcaceae" "Ruminococca…
GATGAACGCTGGCGGCGTGCTTAACACATGCAAGTCGAACGGGCTTATATTGAAACCTAGTGATATATAAGTTAGTGGCGGACGGGTGAGTAACGCGTGGAGAACCTGCCCTGCACAGGGGGATAACACTTAGAAATAGGTGCTAAGACCGCATAAGCGCACGGGACCGCATGGTACAGTGTGAAAAATGGAAACATGGTGCAGGATGGCTCCGCGTCTGATTAGCTGGTTGGCGGGGTAACGGCCCACCAAGGCGACGATCAGTAGCCGGCCTGAGAGGGTGACCGGCCACATTGGGACTGAGACACGGCCCAA "Bacteria" "Firmicutes" "Clostridia" "Clostridiales" "Lachnospiraceae" "Lachnospira…
GATGAACGCTAGCGACAGGCTTAACACATGCAAGTCGAGGGGCAGCGGGGGAGTAGCAATACTCCCGCCGGCGACCGGCGCACGGGTGAGTAACACGTATGAAACCTGCCCGTAGCAGGGGGATAAGCGGAAGAAATTCCGTCTAATACCGCGTAACAACCCGAGGAGGCATCTCCTCGGGTTTAAAGGAAGCGATTCCGGCTACGGATGGTCATGCGTCGCATTAGCTAGTTGGCGGGGTAACGGCCCACCAAGGCGACGATGCGTAGGGGTTCTGAGAGGAAGGTCCCCCACACTGGTACTGAGACACGGACCAG "Bacteria" "Bacteroidetes" "Bacteroidia" "Bacteroidales" "Muribaculaceae" NA NA
GATGAACGCTAGCGACAGGCTTAACACATGCAAGTCGAGGGGCAGCGGGGGCGAAGCTTGCTTCGCCTGCCGGCGACCGGCGCACGGGTGAGTAACACGTATGCGACCTGCCCCCCGCAGGGGGATAACCGGGAGAAATCCCGACTAATACCGCGTAACGCCGCGGACCTGCATGGGTCTGCGGCCAAAGGAAGCGATTCCGGCGGGGGATGGGCATGCGGCGCATTAGCTAGTCGGCGGGGTAACGGCCCACCGAGGCGACGATGCGTAGGGGTTCTGAGAGGAAGGTCCCCCACACTGGTACTGAGACACGGACCAG "Bacteria" "Bacteroidetes" "Bacteroidia" "Bacteroidales" "Muribaculaceae" NA NA
GATGAACGCTGGCGGCGTGCCTAACACATGCAAGTCGAACGGAGACGGAGCTGGAAGGGACAGTTTACTGTAACGGAAAGATCTGTCTTAGTGGCGGACGGGTGAGTAACGCGTGGGCAACCTGCCCTGTACCGGGGGATAACACTTAGAAATAGGTGCTAATACCGCATAATAGGGAATACCGCATGGTAATCCTTTGAAAACTCCGGTGGTACAGGATGGGCCCGCGTCTGATTAGCCAGTTGGCGGGGTAACGGCCCACCAAAGCGACGATCAGCAGCCGGCCTGAGAGGGTGGACGGCCACACTGGGACTGAGACACGGCCCAG "Bacteria" "Firmicutes" "Clostridia" "Clostridiales" "Lachnospiraceae"…
ATTGAACGCTGGCGGAATGCTTTACACATGCAAGTCGAACGGTAACGAGGAGGAAAGCTTGCTTTCCTCTGTCGACGAGTGGCGAACGGGTGAGTAAGACATCGGAACGTATCCGCTCGTGGGGGACAACTTCCCGAAAGGGGAGCTAATACCGCATGAGATCCGAGGATGAAAGAGGGGGACCCGCGAGGGCCTCTCGCGAGCGGAGCGGCCGATGACTGATTAGCTAGTTGGTAAGGTAAAGGCTTACCAAGGCGACGATCAGTAGCTGGTCTGAGAGGACGACCAGCCACACTGGGACTGAGACACGGCCCAG "Bacteria" "Proteobacteria" "Gammaproteobacteria" "Betaproteobacteriales" "Burkhol…
GATGAACGCTGGCGGCGTGCTTAACACATGCAAGTCGAACGGAGATTATACGCAGAGGCGATTTCGGTCAAATCATGTAAAATCTTAGTGGCGGACGGGTGAGTAACGCGTGGGTAACCTGCCTTACACTGGGGGATAACACTTAGAAATAGGTGCTAATACCGCATAAGCGCACGAAGCCGCATGGATTTGTGTGAAAAACTCCGGTGGTGTAAGATGGACCCGCGTCTGATTAGCTTGTTGGCGGGGTAACGGCCCACCAAGGCGACGATCAGTAGCCGGCCTGAGAGGGTGGACGGCCACATTGGGACTGAGACACGGCCCAA "Bacteria" "Firmicutes" "Clostridia" "Clostridiales" "Lachnospiraceae" "…
GACGAACGCTGGCGGCACGCCTAACACATGCAAGTCGAACGGAGATATGAAGATTTATCGGAATATCTTAGTGGCGGACGGGTGAGTAACACGTGAGCAACCTGCCTTTGAGAGTGGAATAGCTTCTGGAAACGGATGGTAATGCCTCATAACATACAAGAATCGCATGGTTTTTGTATCAAAGATTTATCGCTCAAAGATGGGCTCGCGTCTGATTAGATAGTTGGTGGGGTAACGGCTCACCAAGTCGACGATCAGTAGCCGGACTGAGAGGTTGAACGGCCACATTGGGACTGAGACACGGCCCAG "Bacteria" "Firmicutes" "Clostridia" "Clostridiales" "Ruminococcaceae" "Ruminococcus_1" NA
GACGAACGCTGGCGGCGTGCTTAACACATGCAAGTCGAACGGAGCACCCCTGAAGGAGTTTTCGGACAACGGATGGGAATGCTTAGTGGCGGACTGGTGAGTAACGCGTGAGGAACCTGCCTTCCAGAGGGGGACAACAGTTGGAAACGACTGCTAATACCGCATGATGCGTTGGAGCCGCATGACTCCGACGCCAAAGATTTATCGCTGGAAGATGGCCTCGCGTCTGATTAGCTAGTTGGTGAGGTAACGGCCCACCAAGGCGACGATCAGTAGCCGGACTGAGAGGTTGGCCGGCCACATTGGGACTGAGATACGGCCCAG "Bacteria" "Firmicutes" "Clostridia" "Clostridiales" "Ruminococcaceae" "Os…
GATGAACGCTAGCGGCAGGCTTAACACATGCAAGTCGAAGGGCATCGGGGGAAGTGCTTGCACTTCCTGCCGGCGACTGGCGCACGGGTGAGTAACACGTATGCAACCTGCCCTCTTCAGGGGGACAACCTTCCGAAAGGGAGGCTAATCCCGCGTATATCTTTTGGAGGCATCTCCGGAAGAGGAAAGCTTATGCGGAAGAGGATGGGCATGCGGCGCATTAGCTAGACGGCGGGGTAACGGCCCACCGTGGCGACGATGCGTAGGGGTTCTGAGAGGAAGGTCCCCCACACTGGTACTGAGACACGGACCAG "Bacteria" "Bacteroidetes" "Bacteroidia" "Bacteroidales" "Muribaculaceae" NA NA
GATGAACGCTGGCGGCGTGCTTAACACATGCAAGTCGAACGGAGATAAACGGTGAAGAGATTTCGGTCGATTCCTGTTTATCTTAGTGGCGGACGGGTGAGTAACGCGTGGGTAACCTGCCCTGTACAGGGGGATAACACTTAGAAATAGGTGCTAAAACCGCATAAGCGCACAGTACCGCATGGTACAGTGTGAAAAACTCCGGTGGTACAGGATGGACCCGCGTCTGATTAGCTGGTTGGAGGGGTAACGGCCCACCAAGGCGACGATCAGTAGCCGGCCTGAGAGGGTGAACGGCCACATTGGGACTGAGACACGGCCCAA "Bacteria" "Firmicutes" "Clostridia" "Clostridiales" "Lachnospiraceae" "La…
GACGAACGCTGGCGGCGCGCCTAACACATGCAAGTCGAACGGAGCTTATATTTCAGAAGTTTTCGGATGGACGAGAGATAAGCTTAGTGGCGGACGGGTGAGTAACACGTGAGCAACCTGCCTTTCAGAGGGGGATAACAGTTGGAAACGACTGCTAATACCGCATAACGCTGCGATGGGGCATCCCGATGCAGCCAAAGGAGCAATCCGCTGAAAGATGGGCTCGCGGCCGATTAGCTAGTTGGTGGGGCAACGGCCCACCAAGGCGACGATCGGTAGCCGGACTGAGAGGTTGATCGGCCACATTGGGACTGAGACACGGCCCAG "Bacteria" "Firmicutes" "Clostridia" "Clostridiales" "Ruminococcaceae" …
GACGAACGCTGGCGGCACGCCTAACACATGCAAGTCGAACGGTGAAGGGAGCTTGCTCCCGGAACAGTGGCGGACGGGTGAGTAACACGTGAGCAACCTGCCTTTCAGAGGGGGACAACAGTTGGAAACGACTGCTAATACCGCATAAAATAACGGAACCGCATGATTCTGTTATCAAAGGAGAAATCCGCTGAAAGATGGGCTCGCGTCTGATTAGATAGTTGGTGAGGTAACGGCCCACCAAGTCGACGATCAGTAGCCGGACTGAGAGGTTGAACGGCCACATTGGGACTGAGACACGGCCCAG "Bacteria" "Firmicutes" "Clostridia" "Clostridiales" "Ruminococcaceae" "Ruminiclostridium_6…
GACGAACGCTGGCGGCGTGCTTAACACATGCAAGTCGAACGGAGCACCCTTGAAAGAGATTTCGGTCAATGGATAGGAATGCTTAGTGGCGGACTGGTGAGTAACGCGTGAGGAACCTGCCTTCCAGAGGGGGACAACAGTTGGAAACGACTGCTAATACCGCATGACACATGACCGTGGCATCACGGACATGTCAAAGATTTATCGCTGGAAGATGGCCTCGCGTCTGATTAGCTGGTAGGCGGGGTAACGGCCCACCTAGGCGACGATCAGTAGCCGGACTGAGAGGTTGACCGGCCACATTGGGACTGAGATACGGCCCAG "Bacteria" "Firmicutes" "Clostridia" "Clostridiales" "Ruminococcaceae" "Os…
GATGAACGCTGGCGGCGTGCTTAACACATGCAAGTCGAACGGGGTACCCATGACAGAGGCTTCGGCCAATTGATTGGAATACCTAGTGGCGGACGGGTGAGTAACGCGTGAGCAATCTGCCTTGGAGTGGGGAATAACAGTTGGAAACAGCTGCTAATACCGCATAATACAGTTGTGTCGCATGGCACTGACTGTCAAAGATTTATCGCTCTGAGATGAGCTCGCGTCTGATTAGCTAGTTGGTGAGGTAACGGCTCACCAAGGCGACGATCAGTAGCCGGACTGAGAGGTTGGCCGGCCACATTGGGACTGAGACACGGCCCAG "Bacteria" "Firmicutes" "Clostridia" "Clostridiales" "Ruminococcaceae" "R…
GATGAACGCTGGCGGCGTGCTTAACACATGCAAGTCGAACGGACTCATATTGAAACCTAGTGATATATGAGTTAGTGGCGGACGGGTGAGTAACGCGTGGAGAACCTGCCGTATACTGGGGGATAACACTTAGAAATAGGTGCTAATACCGCATAAGCGCACAGCTTCGCATGAAGCAGTGTGAAAAACTCCGGTGGTATACGATGGATCCGCGTCTGATTAGCTTGTTGGCGGGGTAAAGGCCCACCAAGGCGACGATCAGTAGCCGGCCTGAGAGGGTGAACGGCCACATTGGGACTGAGACACGGCCCAA "Bacteria" "Firmicutes" "Clostridia" "Clostridiales" "Lachnospiraceae" "Lachnospirace…
GACGAACGCTGGCGGCGTGCTTAACACATGCAAGTCGAACGGGCTCTAGCAATAGAGCTAGTGGCGGACGGGTGAGTAACACGTGAGCAACCTGCCCTATACAACGGGATAACACTAAGAAATTGGTGCTAATACGGTATAAGACCACGATGAGGCATCTCATAGGGGTAAAAGCTGAGGCGGTATAGGAGGGGCTCGCGGCCCATTAGATAGTTGGTGAGGTAACGGCCCACCAAGTCGACGATGGGTAGCCGACCTGAGAGGGTGATCGGCCACATTGGAACTGAGATACGGTCCAA "Bacteria" "Firmicutes" "Clostridia" "Clostridiales" "Clostridiales_vadinBB60_group" NA NA
GATGAACGCTGGCGGCGTGCCTAACACATGCAAGTCGAACGGGGTCTTAGTGCGGAAGTTTTCGGATGGAAGGATTAAGACCTAGTGGCGGACGGGTGAGTAACGCGTGGGTAACCTACCCTGTACAGGGGGATAACAGTTGGAAACGGCTGCTAAAACCGCATAACATGGAGATACCGCATGATATATCCATCAAATATTTATAGGTACAGGATGGGCCCGCGTCTGATTAGCCAGTTGGCAGGGTAATGGCCTACCAAAGCGACGATCAGTAGCCGGCTTGAGAGAGTGACCGGCCACATTGGGACTGAGACACGGCCCAA "Bacteria" "Firmicutes" "Clostridia" "Clostridiales" "Lachnospiraceae" "Lac…
GACGAACGCTGGCGGCGTGCTTAACACATGCAAGTCGAACGGAGTACCCTCGAAAGAGATTTCGGTCAATGGAGAGGACTACTTAGTGGCGGACGGGTGAGTAACGCGTGAGGAACCTGCCTTTCAGTGGGGGACAACAGTTGGAAACGACTGCTAATACCGCATAACGTATTTGTGTCGCATGGCATGGATACCAAAGATTTATCGCTGAGAGATGGCCTCGCGTCTGATTAGCTAGTTGGTAGGGTAACGGCCTACCAAGGCGACGATCAGTAGCCGGACTGAGAGGTTGGCCGGCCACATTGGGACTGAGATACGGCCCAG "Bacteria" "Firmicutes" "Clostridia" "Clostridiales" "Ruminococcaceae" "Ru…
GACGAACGCTGGCGGCGTGCCTAATACATGCAAGTCGAACGCTTCTTTCCTCCCGAGTGCTTGCACTCAATTGGAAAGAGGAGTGGCGGACGGGTGAGTAACACGTGGGTAACCTACCCATCAGAGGGGGATAACACTTGGAAACAGGTGCTAATACCGCATAACAGTTTATGCCGCATGGCATAAGAGTGAAAGGCGCTTTCGGGTGTCGCTGATGGATGGACCCGCGGTGCATTAGCTAGTTGGTGAGGTAACGGCTCACCAAGGCCACGATGCATAGCCGACCTGAGAGGGTGATCGGCCACACTGGGACTGAGACACGGCCCAG "Bacteria" "Firmicutes" "Bacilli" "Lactobacillales" "Enterococcaceae" …
GATGAACGCTAGCGACAGGCTTAACACATGCAAGTCGAGGGGCAGCACGATGTAGCAATACATTGGTGGCGACCGGCGCACGGGTGAGTAACGCGTATGCAACCTACCTATCAGAGGGGAATAACCCGGCGAAAGTCGGACTAATACCGCATAAAACAGGGGTTCCACATGGAAATATTTGTTAAAGAATTATCGCTGATAGATGGGCATGCGTTCCATTAGATAGTTGGTGAGGTAACGGCTCACCAAGTCCACGATGGATAGGGGTTCTGAGAGGAAGGTCCCCCACACTGGTACTGAGACACGGACCAG "Bacteria" "Bacteroidetes" "Bacteroidia" "Bacteroidales" "Tannerellaceae" "Parabactero…
GACGAACGCTGGCGGCGTGCCTAACACATGCAAGTTGAGCGGAGATATATGGAGCTTGCTTTATATAACTTAGCAGCGAACGGGTGAGTAACACGTAGATAATCTATCCTATACTGGGGGATAGCCCGATGAAAGTTGGATTAATACCGCATATAGCTATATAGTTGCATGATTATGTAGTGAAAGATTTATTGGTATAGGAGGAGTCTGCGGCACATTAGCTAGTAGGTGAGGTAAAGGCTTACCTAGGCGACGATGTGTAGCCGGTCTGAGAGGATGAACGGCCACAATGGAACTGAGACACGGTCCAT "Bacteria" "Firmicutes" "Clostridia" "Clostridiales" "Clostridiaceae_1" "Candidatus_Art…
GACGAACGCTGGCGGCGTGCCTAACACATGCAAGTCGAACGAAGCTTGAATTCAGATTTCTTCGGAATGAAGAATGATATGACTGAGTGGCGGACGGGTGAGTAACGCGTGAGCAACCTGCCCTTCGGAGGGGGATAGTGTCTGGAAACGGACAGTAATACCGCATAACGTATTTTTACCGCATGATAGAAATACCAAAACTGAGGTGCCGAAGGATGGGCTCGCGTTGGATTAGATAGTTGGTGGGGTAACGGCCTACCAAGTCAACGATCCATAGCCGGACTGAGAGGTTGAACGGCCACATTGGGACTGAGACACGGCCCAG "Bacteria" "Firmicutes" "Clostridia" "Clostridiales" "Ruminococcaceae" NA…
GATGAACGCTGGCGGCGTGCTTAACACATGCAAGTCGAACGGGGATAAGACATCGGAAGAGCTGCTTGCAGAATGGAAGAAGTCATATTCTAGTGGCGGACGGGTGAGTAACGCGTGGGCAACCTGCCTTATACAGGGGGATAACAGCTGGAAACAGCTGCTAATACCGCATAAGCGCACAGCGGCGCATGACGCAGTGTGAAAAACTGAGGTGGTATAAGATGGGCCCGCGTCTGATTAGCTGGTTGGGAGGGTAACGGCCTACCAAGGCGACGATCAGTAGCCGGCCTGAGAGGGCGGACGGCCACATTGGGACTGAGACACGGCCCAG "Bacteria" "Firmicutes" "Clostridia" "Clostridiales" "Lachnospirace…
GACGAACGCTGGCGGCATGCCTAACACATGCAAGTCGAACGAGGTAGAAATACCTAGTGGCGGACGGGTGCGTAACACGTGAGCAACCTGCCTCTTACAACGGGATAACACAGAGAAATTTGTGCTAATACGGTATGAGACTACGAGATGGCATCATCTAGTGGTTAAAGTTCAGGCGGTAAGAGAGGGGCTCGCGGCCCATTAGATAGTTGGTGAGGTAACGGCTCACCAAGTCGACGATGGGTAGCCGACCTGAGAGGGTGATCGGCCACACTGGAACTGAGATACGGTCCAG "Bacteria" "Firmicutes" "Clostridia" "Clostridiales" "Clostridiales_vadinBB60_group" NA NA
GATAAACGCTGGCGGCGCACATAAGACATGCAAGTCGAACGGACTTAACTCATTCTTTACGATTGAGAGCGGTTAGTGGCGGACTGGTGAGTAACACGTAAGCAACCTGCCTATCAGAGGGGAATAACAGTGAGAAATCATTGCTAATACCGCATATGCTAACAGTATCGCATGATACAGTTAGGAAAGGAGCAATCCGCTGATAGATGGGCTTGCGTCTGATTAGCTAGTTGGTGGGGTAACGGCCTACCAAGGCGACGATCAGTAGCCGGACTGAGAGGTTGAACGGCCACATTGGGACTGAGATACGGCCCAG "Bacteria" "Firmicutes" "Clostridia" "Clostridiales" "Ruminococcaceae" "Ruminococc…
GATGAACGCTAGCGACAGGCCTAACACATGCAAGTCGAGGGGCATCGGGGAGCGAAGCTTGCTTTGCTCCGCCGGCGACCGGCGCACGGGTGAGTAACGCGTATGCAACCTGCCCGTTTCAGCGGGATAACCCGGAGAAATCCGGCCTAATACCGCATGTGGCCGAGGGGAGGCATCTTCTTTCGGCCAAAGGAGGCGACTCCGGAGACGGATGGGCATGCGTGACATTAGCTAGTTGGCGGGGTAACGGCCCACCAAGGCGACGATGTCTAGGGGTTCTGAGAGGAAGGTCCCCCACACTGGTACTGAGACACGGACCAG "Bacteria" "Bacteroidetes" "Bacteroidia" "Bacteroidales" "Muribaculaceae" "Mu…
GACGAACGCTGGCGGCGTGCTTAACACATGCAAGTCGAACGGAGTGCCTCGGAAAGAGATTTCGGTCAATGGAAGAGGTTACTTAGTGGCGGACGGGTGAGTAACGCGTGAGGAACCTGCCTTTCAGAGGGGGACAACAGTTGGAAACGACTGCTAATACCGCATAACATATGTTTGTCGCATGGCAGATATATCAAAGATTTATCGCTGAGAGATGGCCTCGCGTCTGATTAGCTAGTTGGTAGGGTAACGGCCTACCAAGGCGACGATCAGTAGCCGGACTGAGAGGTTGGCCGGCCACATTGGGACTGAGATACGGCCCAG "Bacteria" "Firmicutes" "Clostridia" "Clostridiales" "Ruminococcaceae" "Ru…
ATTGAACGCTGGCGGCATGCCTTACACATGCAAGTCGAACGGCAGCACGGGGGCAACCCTGGTGGCGAGTGGCGAACGGGTGAGTAATATATCGGAACGTACCCAGTAGTGGGGGATAACTATCCGAAAGGATAGCTAATACCGCATACGATCTGTGGATGAAAGCAGGGGATCTTCGGACCTTGTGCTATTGGAATGGCCGATATCTGATTAGCTAGTTGGTAGGGTAAAAGCCTACCAAGGCGACGATCAGTAGCTGGTCTGAGAGGACGACCAGCCACACTGGAACTGAGACACGGTCCAG "Bacteria" "Proteobacteria" "Gammaproteobacteria" "Betaproteobacteriales" "Burkholderiaceae" "…
GATGAACGCTGGCGGCGTGCTTAACACATGCAAGTCGAACGGGGATGCCATTTTTGAAGCGATTAGCTTGCTAAGAGTGGAAATGTTGGCATCTTAGTGGCGGACGGGTGAGTAACGCGTGGGGAACCTGCCCTGTACAGGGGGATAACACTTAGAAATAGGTGCTAATACCGCATAAGCGCACAGTATCGCATGATACAGTGTGAAAAACTCCGGTGGTACAGGATGGACCCGCGTCTGATTAGCTGGTTGGCGGGGTAACGGCCCACCAAGGCGACGATCAGTAGCCGGCCTGAGAGGGTGAACGGCCACATTGGGACTGAGACACGGCCCAA "Bacteria" "Firmicutes" "Clostridia" "Clostridiales" "Lachnospi…
GATGAACGCTGGCGGCGTGCTTAACACATGCAAGTCGAACGAAGAAGTTTTAGTTTACTAGAACAACTGAGTGGCGGACGGGTGAGTAACGCGTGGGTAACCTGCCCTATGGAGGGGGACAACAGTGGGAAACCGCTGCTAATACCGCATACCTTATTAAGATTGCATGGTCATAATAAGAAAGAGTTATCGCCATAGGATGGGCCCGCGTCTGATTAGCCAGTTGGTAGGGTAACGGCCTACCAAAGCAACGATCAGTAGCCGGCCTGAGAGGGTGAACGGCCACATTGGGACTGAGACACGGCCCAG "Bacteria" "Firmicutes" "Clostridia" "Clostridiales" "Lachnospiraceae" NA NA
GATGAACGCTGGCGGCGTGCCTAACACATGCAAGTCGAACGGGGTCTTAGTGCGGAAGTTTTCGGATGGAAGGATTAAGACTTAGTGGCGGACGGGTGAGTAACGCGTGGGTAACCTGCCCTGTACAGGGGGATAACAGTTGGAAACGGCTGCTAAAACCGCATAACATGGAGATACCGCATGATATTTCCATCAAATATTTATAGGTACAGGATGAGCCCGCGTCTGATTAGCCAGTTGGCAGGGTAATGGCCTACCAAAGCGACGATCAGTAGCCGGCTTGAGAGAGTGACCGGCCACATTGGGACTGAGACACGACCCAA "Bacteria" "Firmicutes" "Clostridia" "Clostridiales" "Lachnospiraceae" NA NA
GATGAACGCTGGCGGCGTGCTTAACACATGCAAGTCGAACGAAGAAGTTTTAGTTTACTAGAACAACTGAGTGGCGGACGGGTGAGTAACGCGTGGGTAACCTGCCCTATGGAGGGGGACAACAGTGGGAAACTGCTGCTAATACCGCATACCTTATTAAGATTGCATGGTCATAATAAGAAAGAGTTATCGCCATAGGATGGGCCCGCGTCTGATTAGCCAGTTGGTAGGGTAACGGCCTACCAAAGCAACGATCAGTAGCCGGCCTGAGAGGGTGAACGGCCACATTGGGACTGAGACACGGCCCAG "Bacteria" "Firmicutes" "Clostridia" "Clostridiales" "Lachnospiraceae" NA NA
GATGAACGCTGGCGGCGTGCTTAACACATGCAAGTCGAACGGGGGTGCCATTTTTGAAGCGGTTAGCTTGCTAAGCGTGGAAATGGTGGCAGCCCAGTGGCGGACGGGTGAGTAACGCGTGGGTAACCTGCCTTACACAGGGGGATAACACTTAGAAATAGGTGCTAATACCGCATAAGCGCACAGTACCGCATGGTACGGTGTGAAAAACTCCGGTGGTGTAAGATGGACCCGCGTCTGATTAGCTTGTTGGCGGGGTAGTGGCCCACCAAGGCGACGATCAGTAGCCGGCCTGAGAGGGTGGACGGCCACATTGGGACTGAGACACGGCCCAA "Bacteria" "Firmicutes" "Clostridia" "Clostridiales" "Lachnospi…
GATGAACGCTGGCGGCGTGCTTAACACATGCAAGTCGAACGGAGTACCCCTGAAGGAGTTTTCGGACAACTGATGGGACTACTTAGTGGCGGACGGGTGAGTAACGCGTGAGTAACCTGCCTTGGAGTGGGGAATAACAGCTGGAAACAGCTGCTAATACCGCATAATATGTCTGTGTCGCATGGCACTGGACATCAAAGATTTATCGCTCTGAGATGGACTCGCGTCTGATTAGCTAGTTGGCGGGGTAACGGCCCACCAAGGCGACGATCAGTAGCCGGACTGAGAGGTTGGCCGGCCACATTGGGACTGAGACACGGCCCAG "Bacteria" "Firmicutes" "Clostridia" "Clostridiales" "Ruminococcaceae" "R…
GACGAACGCTGGCGGCGTGCTTAACACATGCAAGTCGAACGGACCTTATTTGGAGGAAGCTTTCGGGTAGACACTGAATAAGGTTAGTGGCGGACGGGTGAGTAACGCGTAGATAATCTACCTTAAAGACTGGGACAACAGTTGGAAACGACTGCTAATACCGGATAAGCTAAACGGAAGGCATCTTCTGTTTAGGAAAGGAGGCCTCTTAACAATGCTCCCGCTTTTAGATGAGTCTGCGTCTGATTAGCTAGTTGGTGGGGTAACGGCTTACCAAGGCGACGATCAGTAGTCGGCCTGAGAGGGTGACCGGCCACATTGGGACTGAGACACGGCCCAA "Bacteria" "Firmicutes" "Clostridia" "Clostridiales" "Pept…
GACGAACGCTGGCGGCGTGCCTAATACATGCAAGTCGAGCGGACAGATGGGAGCTTGCTCCCTGATGTTAGCGGCGGACGGGTGAGTAACACGTGGGTAACCTGCCTGTAAGACTGGGATAACTCCGGGAAACCGGGGCTAATACCGGATGCTTGTTTGAACCGCATGGTTCAAACATAAAAGGTGGCTTCGGCTACCACTTACAGATGGACCCGCGGCGCATTAGCTAGTTGGTGAGGTAATGGCTCACCAAGGCAACGATGCGTAGCCGACCTGAGAGGGTGATCGGCCACACTGGGACTGAGACACGGCCCAG "Bacteria" "Firmicutes" "Bacilli" "Bacillales" "Bacillaceae" "Bacillus" NA
GATGAACGCTAGCGGCAGGCTTAACACATGCAAGTCGCGGGGCAGCGGGGGATGAGCTTGCTCATCCCGCCGGCGACCGGCGCACGGGTGAGTAACACGTATGCAACCTGCCCCTGTCAGGGGGACAACCCACCGAAAGGTGGGCTAAACCCGCGTACATCCGGAGGGGGCATCCCCTTGGGAGGAAAGGAGCGATCCGGACAGGGATGGGCATGCGGCGCATTAGCTAGACGGCGGGGTAACGGCCCACCGTGGCGACGATGCGTAGGGGTTCTGAGAGGAAGGCCCCCCACACTGGTACTGAGACACGGACCAG "Bacteria" "Bacteroidetes" "Bacteroidia" "Bacteroidales" "Muribaculaceae" NA NA
GATGAACGCTAGCGACAGGCTTAACACATGCAAGTCGAGGGGCAGCGGGGGCGAAGCTTGCTTCGCCTGCCGGCGACCGGCGCACGGGTGAGTAACACGTATGCAACCTACCCCCTGCAGGGGAATAACCCGGAGAAATCCGGACTAATACCACACGGCACTTTCGGGAGGCATCTTCTGAGGGTTAAAGGAGCGATCCGGCCGGGGATGGGCATGCGGCGCATTAGCTAGTCGGCGGGGTAACGGCCCACCGAGGCGACGATGCGTAGGGGTTCTGAGAGGAAGGTCCCCCACACTGGTACTGAGACACGGACCAG "Bacteria" "Bacteroidetes" "Bacteroidia" "Bacteroidales" "Muribaculaceae" NA NA
GATGAACGCTGGCGGCGTGCTTAACACATGCAAGTCGAATGTAGCAATACATGGCGGACGGGTGAGTAACGCGTGAGCAATCTGCCCATATCTGGGGGATAACAGTTGGAAACGACTGATAATACCGCATAATATGGTTTGAAGGCATCTTCGAACCATCAAAGATTTATCGGATATGGATGAGCTCGCGTCTGATTAGCTAGTTGGTGAGGTAACGGCTCACCAAGGCGACGATCAGTAGCCGACCTGAGAGGGTGATCGGCCACATTGGAACTGAGACACGGTCCAA "Bacteria" "Firmicutes" "Clostridia" "Clostridiales" "Clostridiales_vadinBB60_group" NA NA
ATTGAACGCTGGCGGCAGGCCTAACACATGCAAGTCGAACGGTAACAGGAAGCAGCTTGCTGCTTTGCTGACGAGTGGCGGACGGGTGAGTAATGTCTGGGAAACTGCCTGATGGAGGGGGATAACTACTGGAAACGGTGGCTAATACCGCATAACGTCGCAAGACCAAAGAGGGGGACCTTCGGGCCTCTTGCCATCAGATGTGCCCAGATGGGATTAGCTTGTTGGTGAGGTAACGGCTCACCAAGGCGACGATCCCTAGCTGGTCTGAGAGGATGACCAGCCACACTGGAACTGAGACACGGTCCAG "Bacteria" "Proteobacteria" "Gammaproteobacteria" "Enterobacteriales" "Enterobacteriacea…
GACGAACGCTGGCGGCGCGCCTAACACATGCAAGTCGAACGGAGCTTATATTTCAGAAGTTTTCGGATGGACGAGAGATAAGTTTAGTGGCGGACGGGTGAGTAACACGTGAGCAACCTGCCTTTCAGAGGGGGATAACAGTTGGAAACGACTGCTAATACCGCATAACGCTGCGATGGGGCATCCCGATGCAGCCAAAGGAGCAATCCGCTGGAAGATGGGCTCGCGGCCGATTAGCTAGTTGGTGGGGCAACGGCCCACCAAGGCGACGATCGGTAGCCGGACTGAGAGGTTGATCGGCCACATTGGGACTGAGACACGGCCCAG "Bacteria" "Firmicutes" "Clostridia" "Clostridiales" "Ruminococcaceae" …
GACGAACGCTGGCGGCGTGCTTAACACATGCAAGTCGAACGGAGTACCCTCGAAAGAGATTTCGGTCAATGGAGAGGACTACTTAGTGGCGGACGGGTGAGTAACGCGTGAGGAACCTGCCTTTCAGAGGGGGACAACAGCTGGAAACGGCTGCTAATACCGCATAACGCATAGGTATCGCATGGTACAGATGCCAAAGATTTATCGCTGAGAGATGGCCTCGCGTCTGATTAGCTAGTTGGTAGGGTAACGGCCTACCAAGGCGACGATCAGTAGCCGGACTGAGAGGTTGGCCGGCCACATTGGGACTGAGATACGGCCCAG "Bacteria" "Firmicutes" "Clostridia" "Clostridiales" "Ruminococcaceae" "Ru…
GATGAACGCTGGCGGCGTGCCTAATACATGCAAGTCGAACGAAACTTCTTTATCACCGAGTGCTTGCACTCACCGATAAAGAGTTGAGTGGCGAACGGGTGAGTAACACGTGGGCAACCTGCCCAAAAGAGGGGGATAACACTTGGAAACAGGTGCTAATACCGCATAACCATAGTTACCGCATGGTAACTATGTAAAAGGTGGCTATGCTACCGCTTTTGGATGGGCCCGCGGCGCATTAGCTAGTTGGTGGGGTAAAGGCTTACCAAGGCAATGATGCGTAGCCGAACTGAGAGGTTGATCGGCCACATTGGGACTGAGACACGGCCCAA "Bacteria" "Firmicutes" "Bacilli" "Lactobacillales" "Lactobacillac…
GATGAACGCTAGCGACAGGCTTAACACATGCAAGTCGAGGGGCAGCGGGTAGATGAGCTTGCTCATTTATGCCGGCGACCGGCGCACGGGTGAGTAACACGTATGCAACCTGCCCGTCTCAGGGGGATAATCGTCGGAAACGGCGTCTAATACCCCGTATGAAGCTGGACGGCATCGTCTGGTTTTGAAAGAATATCGGAGACGGATGGGCATGCGGCGCATTAGCTAGTTGGCGGGGTAACGGCCCACCAAGGCGACGATGCGTAGGGGTTCTGAGAGGAAGGTCCCCCACACTGGTACTGAGACACGGACCAG "Bacteria" "Bacteroidetes" "Bacteroidia" "Bacteroidales" "Muribaculaceae" NA NA
GACGAACGCTGGCGGCGTGCTTAACACATGCAAGTCGAACGGAGTACCCTCGAAAGAGATTTCGGTCAATGGAGAGGACTACTTAGTGGCGGACGGGTGAGTAACGCGTGAGGAACCTGCCTTTCAGAGGGGGACAACAGTTGGAAACGACTGCTAATACCGCATAACGTATTTGTGTCGCATGGCATGGATACCAAAGATTTATCGCTGAGAGATGGCCTCGCGTCTGATTAGCTAGTTGGTAGGGTAACGGCCTACCAAGGCGACGATCAGTAGCCGGACTGAGAGGTTGGCCGGCCACATTGGGACTGAGATACGGCCCAG "Bacteria" "Firmicutes" "Clostridia" "Clostridiales" "Ruminococcaceae" "Ru…
GATGAACGCTGGCGGCGTGCCTAATACATGCAAGTCGAGCGAACGGACGAGAAGCTTGCTTCTCTGATGTTAGCGGCGGACGGGTGAGTAACACGTGGATAACCTACCTATAAGACTGGGATAACTTCGGGAAACCGGAGCTAATACCGGATAATATTTTGAACCGCATGGTTCAAAAGTGAAAGACGGTCTTGCTGTCACTTATAGATGGATCCGCGCTGCATTAGCTAGTTGGTAAGGTAACGGCTTACCAAGGCAACGATGCATAGCCGACCTGAGAGGGTGATCGGCCACACTGGAACTGAGACACGGTCCAG "Bacteria" "Firmicutes" "Bacilli" "Bacillales" "Staphylococcaceae" "Staphylococcu…
GATGAACGCTGGCGGCGTGCTTAACACATGCAAGTCGAACGAAGCAGGAGGGTGCTTGCACCTTCCTGCTGAGTGGCGGACGGGTGAGTAACACGTGGATAATCTGCCCTGCACAGGGGGACAACAGCTAGAAATGGCTGCTAATACCGCATAAGCCTACAGCCTCGCATGAGGGAGTAGGAAAAGAAATTCGGTGCAGGATGAGTCCGCGTCTGATTAGCTAGTTGGAGGGGTAAAAGCCCACCAAGGCAACGATCAGTAGCCGGCCTGAGAGGGCGACCGGCCACATTGGGACTGAGACACGGCCCAA "Bacteria" "Firmicutes" "Clostridia" "Clostridiales" "Lachnospiraceae" NA NA
GATGAACGCTAGCGGCAGGCTTAACACATGCAAGTCGAGGGGCAGCGGGGAGGAAGCTTGCTTTCTCCGCCGGCGACCGGCGCACGGGTGAGTAACACGTATGCAACCTGCCCCTGTCAGGGGGACAACCCGCCGAAAGGCGGGCTAAACCCGCGTACATGCCACTGGGGCATCCCGGAGGCAGGAAAGGCTTCGGCCGGACAGGGATGGGCATGCGGCGCATTAGGCAGTAGGCGGGGTAACGGCCCACCTAACCGACGATGCGTAGGGGTTCTGAGAGGAAGGTCCCCCACACTGGTACTGAGACACGGACCAG "Bacteria" "Bacteroidetes" "Bacteroidia" "Bacteroidales" "Muribaculaceae" NA NA
GATGAACGCTAGCGACAGGCCTAACACATGCAAGTCGAGGGGCAGCGGGGAGCGAAGCTTGCTTTGCTCCGCCGGCGACCGGCGCACGGGTGAGTAACGCGTATGCAACCTGCCCGTTTCAGCGGGATAACCCGGAGAAATCCGGCCTAATACCGCATGTGGCCGAGGGGAGGCATCTTCTTTCGGCCAAAGGAGGCAACTCCGGAGACGGATGGGCATGCGTGACATTAGCTTGTTGGCGGGGTAACGGCCCACCAAGGCGACGATGTCTAGGGGTTCTGAGAGGAAGGTCCCCCACACTGGTACTGAGACACGGACCAG "Bacteria" "Bacteroidetes" "Bacteroidia" "Bacteroidales" "Muribaculaceae" "Mu…
GACGAACGCTGGCGGCACGCCTAACACATGCAAGTCGAACGGAGTGAAGATGCTTGCATCTGAACTTAGTGGCGGACGGGTGAGTAACACGTGAGCAACCTGCCTTTCAGAGGGGGATAACGTTTGGAAACGAACGCTAATACCGCATAAAATATCGGAGTCGCATGGCACTGATATCAAAGGAGCAATCCGCTGAAAGATGGGCTCGCGTCCGATTAGGCAGTTGGCGGGGTAACGGCCCACCAAACCGACAATCGGTAGCCGGACTGAGAGGTTGAACGGCCACATTGGGACTGAGACACGGCCCAG "Bacteria" "Firmicutes" "Clostridia" "Clostridiales" "Ruminococcaceae" NA NA
GACGAACGCTGGCGGCACGCCTAACACATGCAAGTCGAACGGACGAGAGGAAGCTTGCTTCCTTGAGTTAGTGGCGGACGGGTGAGTAACACGTGAGCAACCTGCCTCTGAGAGAGGGATAGCTTCTGGAAACGGATGGTAATACCTCATAACATATTTAAATCGCATGATTTGGATATCAAAGAAATTCGCTCAGAGATGGGCTCGCGTCTGATTAGATAGTTGGTGAGGTAACGGCTCACCAAGTCGACGATCAGTAGCCGGACTGAGAGGTTGAACGGCCACATTGGGACTGAGACACGGCCCAG "Bacteria" "Firmicutes" "Clostridia" "Clostridiales" "Ruminococcaceae" "Ruminococcus_1" NA
GACGAACGCTGGCGGCGTGCTTCAAACATGCAAGTCGAACGGAGTTAATTTAGCTTGCTAAATTAACTTAGTGGCGGACTGGTGAGTAACGCGTGAGTAATCTGCCTATTACAGGGGGATAACAGTTGGAAACGACTGCTAATACCGCATAAGACCACGAGAAGGCATCTTCTAGGGGTCAAAGGGTTTACTGGTAATAGATGAGCTTGCGTATCATTAGCTAGATGGTGAGGGTAAAGGCCCACCATGGCGACGATGATTAGCCGATCTGAGAGGATGACCGGCCACACTGGAACTGAGATACGGTCCAG "Bacteria" NA NA NA NA NA NA
GATGAACGCTAGCGACAGGCTTAACACATGCAAGTCGAGGGGCAGCGGGAAGGTTAGCTTGCTAACCTTTGCCGGCGACCGGCGCACGGGTGAGTAACACGTATGCAACCTGTCCGGTACAGGGGGATAAGCGGCGGAAACGCCGTCTAATACCGCGTGACAACCCGAGGGGGCATCCCCTTGGGTTCAAAGGAGAGATCCGGTACCGGCTGGGCATGCGGCGCATTAGCTAGTTGGCGGGGCAACGGCCCACCAAGGCGACGATGCGTAGGGGTTCTGAGAGGAAGGTCCCCCACACTGGAACTGAGACACGGTCCAG "Bacteria" "Bacteroidetes" "Bacteroidia" "Bacteroidales" "Muribaculaceae" NA NA
GATGAACGCTGGCGGCGTGCTTAACACATGCAAGTCGAACGGACCCATATTGAAACCTAGTGATATATGGGTTAGTGGCGGACGGGTGAGTAACGCGTGGGTAACCTGCCTTACACAGGGGGATAACACTTAGAAATAGGTGCTAAAACCGCATAAGCGCACAGCTTCGCATGAAGCGGTGTGAAAAACTCCGGTGGTGTAAGATGGACCCGCGTCTGATTAGCTTGTTGGCGGGGTAACGGCCCACCAAGGCGACGATCAGTAGCCGGCCTGAGAGGGCGGACGGCCACATTGGGACTGAGACACGGCCCAG "Bacteria" "Firmicutes" "Clostridia" "Clostridiales" "Lachnospiraceae" "Lachnospirace…
ATTGAACGCTGGCGGCGTGCTTAACACATGCAAGTCGAACGCGAAAGGGGGCTTCGGCTCCCGAGTAGAGTGGCGCACGGGTGAGTAACGCGTGGATAATCTGCCCTCTTGTTCGGGATAACTGCTGGAAACGGCAGCTAATACCGGATAAGCTCTACCAATTGTATGGTGGAGGAAAGGAGGCCTCTTCATGAAAGCTTCCGCGAGGGGATGAGTCCGCGTCCCATTAGCTAGTTGGTGAGGTAACGGCCCACCAAGGCAACGATGGGTAGCCGGTCTAAGAGGATGACCGGCCACACTGGAACTGAAACACGGTCCAG "Bacteria" "Proteobacteria" "Deltaproteobacteria" "Desulfovibrionales" "Desulf…
GACGAACGCTGGCGGCGTGCTTAACACATGCAAGTCGAACGGAACGCCTTGGAAAGAGATTTCGGTCAATGGAAGGGGTTGTTTAGTGGCGGACGGGTGAGTAACGCGTGAGGAACCTGCCTTTCAGAGGGGGACAACAGTTGGAAACGACTGCTAATACCGCATAATGCATAGGTATCGCATGGTACAGATGCCAAAGATTTATCGCTGAGAGATGGCCTCGCGTCTGATTAGCTAGTTGGTAGGGTAACGGCCTACCAAGGCGACGATCAGTAGCCGGACTGAGAGGTTGGCCGGCCACATTGGGACTGAGATACGGCCCAG "Bacteria" "Firmicutes" "Clostridia" "Clostridiales" "Ruminococcaceae" "Ru…
GATGAACGCTAGCGACAGGCTTAACACATGCAAGTCGAGGGGCAGCGGGGTAGTGCTTGCACTACTGCCGGCGACCGGCGCACGGGTGAGTAACACGTATGGAACCTGCCCGCAGCAGGGGGATAAGCGGAAGAAATTCCGTCTAATACCGCGTAACAACGTTGGGAGGCATCTCCCGATGTTTAAAGATTTATCGGCTGCGGATGGCCATGCGGCGCATTAGCTAGTCGGCGGGGTAACGGCCCACCGAGGCGACGATGCGTAGGGGTTCTGAGAGGAAGGTCCCCCACACTGGTACTGAGACACGGACCAG "Bacteria" "Bacteroidetes" "Bacteroidia" "Bacteroidales" "Muribaculaceae" NA NA
GATGAACGCTAGCGGCAGGCTTAACACATGCAAGTCGAGGGGCATCGGGAGGAAAGCTTGCTTTCCTTGCCGGCGACCGGCGCACGGGTGAGTAACACGTATGCAACCTGCCCTCTTCAGGGGGACAACCTTCCGAAAGGGAGGCTAATCCCGCGTATATCGGTTTCGGGCATCCGAGATCGAGGAAAGATTCATCGGAAGAGGATGGGCATGCGGCGCATTAGCTAGACGGCGGGGTAACGGCCCACCGTGGCGACGATGCGTAGGGGTTCTGAGAGGAAGGTCCCCCACACTGGTACTGAGACACGGACCAG "Bacteria" "Bacteroidetes" "Bacteroidia" "Bacteroidales" "Muribaculaceae" NA NA
GATGAACGCTGGCGGCGTGCCTAACACATGCAAGTCGAACGGGGGCGCCGAGGCGGCAGGATTTCGGTCCGCGCCGCGCGGCGCCCCAGTGGCGGACGGGTGAGTAACGCGTGGGCAACCTGCCTCGCACTGGGGGATAACACTTAGAAATAGGTGCTAACACCGCATAGCGGGCGGGGGCGCATGCCCCTGCCCTGAAAACCCAGGTGGTGCGAGATGGGCCCGCGTCTGATTAGCTGGTTGGCAGGGTAACGGCCTACCAAGGCGACGATCAGTAGCCGGCCTGAGAGGGTGGACGGCCACATTGGGACTGAGACACGGCCCAG "Bacteria" "Firmicutes" "Clostridia" "Clostridiales" "Lachnospiraceae" N…
GACGAACGCTGGCGGCACGCCTAACACATGCAAGTCGAACGGAGTGAAGATGCTCGCATCTGAACTTAGTGGCGGACGGGTGAGTAACACGTGAGCAACCTGCCTTTCAGAGGGGGATAACGTTTGGAAACGAACGCTAATACCGCATAAAATATCGGAGTCGCATGGCACTGATATCAAAGGAGCAATCCGCTGAAAGATGGGCTCGCGTCCGATTAGGCAGTTGGCGGGGTAACGGCCCACCAAACCGACAATCGGTAGCCGGACTGAGAGGTTGAACGGCCACATTGGGACTGAGACACGGCCCAG "Bacteria" "Firmicutes" "Clostridia" "Clostridiales" "Ruminococcaceae" NA NA
GATGAACGCTAGCGACAGGCCTAACACATGCAAGTCGAGGGGCATCGGGGGTGGAAGCTTGCTTCCGCCTGCCGGCGACCGGCGCACGGGTGAGTAACGCGTATGCAACCTGCCCGGACCAGCGGGATAACCCGGGGAAACCCGGCCTAATACCGCACGGCGCCGCCAAGGGGCATCCCTTGGCGGCTAAAGAACCATCGGGTCCGGATGGGCATGCGTGGCATTAGCTTGTTGGCGGGGTAACGGCCCACCAAGGCGACGATGCCTAGGGGTTCTGAGAGGAAGGTCCCCCACACTGGTACTGAGACACGGACCAG "Bacteria" "Bacteroidetes" "Bacteroidia" "Bacteroidales" "Muribaculaceae" NA NA
GATGAACGCTGGCGGCGTGCTTAACACATGCAAGTCGAATGTAGCAATACATGGCGGACGGGTGAGTAACGCGTGAGCAATCTGCCCATATCTGGGGGATAACAGTTGGAAACGACTGATAATACCGCATAACATGGTTTGAAGGCATCTTCTTTCCATCAAAGATTTATCGGATATGGATGAGCTCGCGTCTGATTAGCTTGTTGGTGAGGTAACGGCTCACCAAGGCGACGATCAGTAGCCGACCTGAGAGGGTGATCGGCCACATTGGAACTGAGACACGGTCCAA "Bacteria" "Firmicutes" "Clostridia" "Clostridiales" "Clostridiales_vadinBB60_group" NA NA
GATGAACGCTAGCGACAGGCTTAACACATGCAAGTCGAGGGGCAGCGGGAAGGTTAGCTTGCTAATCTTTGCCGGCGACCGGCGCACGGGTGAGTAACACGTATGCAACCTGTCCGGTACAGGGGGATAAGCGGCGGAAACGCCGTCTAATACCGCGTGACAACCCGAGGGGGCATCCCCTTGGGTTCAAAGGAGAGATCCGGTACCGGCTGGGCATGCGGCGCATTAGCTAGTTGGCGGGGCAACGGCCCACCAAGGCGACGATGCGTAGGGGTTCTGAGAGGAAGGTCCCCCACACTGGAACTGAGACACGGTCCAG "Bacteria" "Bacteroidetes" "Bacteroidia" "Bacteroidales" "Muribaculaceae" NA NA
GATAAACGCTGGCGGCATGCCTAACACATGCAAGTCGAACGGGGTTTATATAACAGAACTCTCCGGAGGGAAGATATATAAACCTAGTGGCGGACGGGTGAGTAACGCGTGGGCAACCTGCCCTGTACCGGGGGACAACAGCCAGAAATGGCTGCTAATACCGCATAAGCCCCGTGTGCCGCATGGCACACGGGGGAAAACTCCGGTGGTACAGGATGGGCCCGCGTCTGATTAGCTTGTTGGCGGGGTAACGGCCCACCAAGGCAGCGATCAGTAGCCGGCTTGAGAGAGCGGACGGCCACATTGGGACTGAGACACGGCCCAG "Bacteria" "Firmicutes" "Clostridia" "Clostridiales" "Lachnospiraceae" "L…
GATGAACGCTGGCGGCGTGCTTAACACATGCAAGTCGAACGGGGATTACACGGAGATGCGATTTCGGTCAAATCAAGTGCAATCTTAGTGGCGGACGGGTGAGTAACGCGTGGGTAACCTGCCTTGCACTGGGGGATAACACTTAGAAATAGGTGCTAATACCGCATAAGCGCACGGTCCTGCATGGGACAGTGTGAAAAACTCCGGTGGTGCAAGATGGACCCGCGTCTGATTAGCTGGTTGGCGGGGTAAAGGCCCACCAAGGCGACGATCAGTAGCCGGCCTGAGAGGGTGGACGGCCACATTGGGACTGAGACACGGCCCAA "Bacteria" "Firmicutes" "Clostridia" "Clostridiales" "Lachnospiraceae" "…
GATGAACGCTAGCGACAGGCTTAACACATGCAAGTCGAGGGGCAGCGGGGGAGTAGCAATACTCCCGCCGGCGACCGGCGCACGGGTGAGTAACACGTATGAAACCTGCCCGTAGCAGGGGGATAAGCGGAAGAAATTCCGTCTAATACCGCGTAACAACCCATGGAGGCATCTCTGTGGGTTTAAAGGAAGCGATTCCGGCTACGGATGGTCATGCGTCGCATTAGCTTGTTGGCGGGGTAACGGCCCACCAAGGCGACGATGCGTAGGGGTTCTGAGAGGAAGGTCCCCCACACTGGTACTGAGACACGGACCAG "Bacteria" "Bacteroidetes" "Bacteroidia" "Bacteroidales" "Muribaculaceae" NA NA
GACGAACGCTGGCGGCATGCCTAACACATGCAAGTCGAACGGGGATAGCAATATCCTAGTGGCGAACGGGTGAGTAACGCGTGAGCAACCTGCCTTGTACAACGGGATACCCGAGGGAAACTTCGGTTAATACGGTATAAGACCACACTACCGCATGGTAGAGGGGTAAAAGGAGAAATCCGGTATAAGATGGGCTCGCGTCGCATTAGCTAGTTGGTAAGGTAACGGCTTACCAAGGCGACGATGCGTAGCCGACCTGAGAGGGTGATCGGCCACATTGGGACTGAGATACGGCCCAG "Bacteria" "Firmicutes" "Clostridia" "Clostridiales" "Clostridiales_vadinBB60_group" NA NA
GATGAACGCTAGCTACAGGCTTAACACATGCAAGTCGAGGGGCATCATGGCGGTCGCTTGCGACCGCTGATGGCGACCGGCGCACGGGTGCGTAACGCGTATCGAACCTGCCGCATACCCGGGGATAGCCTTGCGAAAGCAAGATTAATACCCGATGTTCTCACTGTTCCGCATGTTACGGTGAGCAAAGAATTTCGGTATGCGATGGCGATGCGTCCCATTAGCTAGTTGGCGGGGTAACGGCCCACCAAGGCTCCGATGGGTAGGGGTTCTGAGAGGAAGGTCCCCCACACTGGAACTGAGACACGGTCCAG "Bacteria" "Bacteroidetes" "Bacteroidia" "Bacteroidales" "Prevotellaceae" "Alloprevo…
GACGAACGCTGGCGGCGTGCTTAACACATGCAAGTCGAACGGAGTGCTCCGGAAAGAGATTTCGGTCAATGGATGGAGTTACTTAGTGGCGGACGGGTGAGTAACGCGTGAGGAACCTGCCTTTCAGAGGGGGACAACAGTTGGAAACGACTGCTAATACCGCATAACGCATGGGTATCGCATGGTATCTGTGCCAAAGATTTATCGCTGAGAGATGGCCTCGCGTCTGATTAGCTAGTTGGTGAGGTAACGGCCCACCAAGGCGACGATCAGTAGCCGGACTGAGAGGTTGGCCGGCCACATTGGGACTGAGATACGGCCCAG "Bacteria" "Firmicutes" "Clostridia" "Clostridiales" "Ruminococcaceae" "Ru…
GATGAACGCTGGCGGCGTGCCTAACACATGCAAGTCGAACGGGTGTACAGAAGGGAAGATTACGGTCGGAAGGTCTGTGCATGAGTGGCGGACGGGTGAGTAACGCGTGGGCAACCTGGCCTGTACAGGGGGATAACACTTAGAAATAGGTGCTAATACCGCATAACGGGGGAAGCCGCATGGCTTTTCCCTGAAAACTCCGGTGGTACAGGATGGGCCCGCGTCTGATTAGCCAGTTGGCAGGGTAACGGCCTACCAAAGCGACGATCAGTAGCCGGCCTGAGAGGGCGGACGGCCACACTGGGACTGAGACACGGCCCAG "Bacteria" "Firmicutes" "Clostridia" "Clostridiales" "Lachnospiraceae" NA NA
GATGAACGCTGGCGGCGTGCTTAACACATGCAAGTCGAACGAAGCAGGAGGGTGCTTGCACCTTTCTGCTGAGTGGCGGACGGGTGAGTAACACGTGGATAATCTGCCCTGCACAGGGGGACAACAGCTAGAAATGGCTGCTAATACCGCATAAGCCTACAGCCTCGCATGAGGGAGTAGGAAAAGAAATTCGGTGCAGGATGAGTCCGCGTCTGATTAGCTAGTTGGAGGGGTAAAAGCCCACCAAGGCAACGATCAGTAGCCGGCCTGAGAGGGCGACCGGCCACATTGGGACTGAGACACGGCCCAA "Bacteria" "Firmicutes" "Clostridia" "Clostridiales" "Lachnospiraceae" NA NA
GATGAACGCTGGCGGCGTGCCTAACACATGCAAGTCGAACGGAGCCTTAACCAAAGAAGCAACCAGCTTGCTGGAAGCGGAAAAGGGAAAGGCTTAGTGGCGGACGGGTGAGTAACGCGTGGGTAACCTGGCCCATACAGGGGGATAACACTTAGAAATAGGTGCTAATACCGCATAACAACAGAAAGCGCATGCTTTTTGTTTGAAAACCAAGGTGGTATGGGATGGACCCGCGTCTGATTAGCTGGTTGGCGGGGTAAAGGCCCACCAAGGCGACGATCAGTAGCCGGCCTGAGAGGGTGGACGGCCACATTGGGACTGAGACACGGCCCAA "Bacteria" "Firmicutes" "Clostridia" "Clostridiales" "Lachnospir…
GATGAACGCTGGCGGCGTGCTTAACACATGCAAGTCGAACGGGGATGCATTAAGAAGGAGTGCTTGCATTCCGGAAGGATGTATCTTAGTGGCGGACGGGTGAGTAACGCGTGGGTAACCTGCCCCATACCGGGGGATACCACCTGGAAACAGGTGCTAATACCGCATAAGCGCACGGGAGCGCATGCTCCTGTGTGAAAAACTCCGGTGGTATGGGATGGACCCGCGTCTGATTAGCCAGTTGGCAGGGTAACGGCCTACCAAAGCGACGATCAGTAGCCGGCCTGAGAGGGTGGACGGCCACATTGGGACTGAGACACGGCCCAA "Bacteria" "Firmicutes" "Clostridia" "Clostridiales" "Lachnospiraceae" …
GACGAACGCTGGCGGCGCGCCTAACACATGCAAGTCGAACGGGACTATTTTGGGAGAAGTTTTCGGATGGATCTCGGGATAGTTTAGTGGCGGACGGGTGAGTAACACGTGAGCAACCTACCTTCGAGAGGGGAATAACGGCTGGAAACGGTCGCTAATACCGCATAACATACTGGAGGGACATCCCTTTGGTATCAAAGATTTTATCGCTCGGAGATGGGCTCGCGTCCGATTAGGTAGTTGGTGAGGTAACGGCTCACCAAGCCGACGATCGGTAGCCGGACTGAGAGGTCGAACGGCCACATTGGGACTGAGACACGGCCCAG "Bacteria" "Firmicutes" "Clostridia" "Clostridiales" "Ruminococcaceae" N…
GATGAACGCTAGCGACAGGCTTAACACATGCAAGTCGAGGGGCAGCGGGGGAGTAGCAATACTCCCGCCGGCGACCGGCGCACGGGTGAGTAACACGTATGAAACCTGCCCGTAGCAGGGGGGTAAGCGGAAGAAATTCCGTCTAATACCGCGTAACAACCCATGGAGGCATCTCCTCGGGTTTAAAGGAAGCGATTCCGGCTACGGATGGTCATGCGTCGCATTAGCTTGTTGGCGGGGTAACGGCCCACCAAGGCGACGATGCGTAGGGGTTCTGAGAGGAAGGTCCCCCACACTGGTACTGAGACACGGACCAG "Bacteria" "Bacteroidetes" "Bacteroidia" "Bacteroidales" "Muribaculaceae" NA NA
GACGAACGCTGGCGGCGTGCTTAACACATGCAAGTCGAACGGAGTGCCTTGGAAAGAGATTTCGGTCAATGGAAGAGGTTACTTAGTGGCGGACGGGTGAGTAACGCGTGAGGAACCTGCCTTTCAGAGGGGGACAACAGTTGGAAACGACTGCTAATACCGCATAACATATGTTTGTCGCATGGCAGATATATCAAAGATTTATCGCTGAGAGATGGCCTCGCGTCTGATTAGCTAGTTGGTAGGGTAACGGCCTACCAAGGCGACGATCAGTAGCCGGACTGAGAGGTTGGCCGGCCACATTGGGACTGAGATACGGCCCAG "Bacteria" "Firmicutes" "Clostridia" "Clostridiales" "Ruminococcaceae" "Ru…
GATGAACGCTGGCGGCGTGCCTAACACATGCAAGTCGAACGGATCCATATTGAAACCTAGTGATGTATGGATTAGTGGCGGACGGGTGAGTAACGCGTGGATAACCTGCCGTATACAGGGGGATAACACTTAGAAATAGGTGCTAATACCGCATAAGCGCACGGTTCCGCATGGAACAGTGTGAAAAACTCCGGTGGTATACGATGGATCCGCGTCTGATTAGCCAGTTGGCGGGGTAACGGCCCACCAAAGCGACGATCAGTAGCCGGCCTGAGAGGGTGAACGGCCACATTGGGACTGAGACACGGCCCAA "Bacteria" "Firmicutes" "Clostridia" "Clostridiales" "Lachnospiraceae" "Lachnospirace…
ATTGAACGCTGGCGGCAGGCCTAACACATGCAAGTCGAGCGGATGAAGGGAGCTTGCTCCTGGATTCAGCGGCGGACGGGTGAGTAATGCCTAGGAATCTGCCTGGTAGTGGGGGATAACGTCCGGAAACGGGCGCTAATACCGCATACGTCCTGAGGGAGAAAGTGGGGGATCTTCGGACCTCACGCTATCAGATGAGCCTAGGTCGGATTAGCTAGTTGGTGGGGTAAAGGCCTACCAAGGCGACGATCCGTAACTGGTCTGAGAGGATGATCAGTCACACTGGAACTGAGACACGGTCCAG "Bacteria" "Proteobacteria" "Gammaproteobacteria" "Pseudomonadales" "Pseudomonadaceae" "Pseudo…
GACGAACGCTGGCGGCGCGCCTAACACATGCAAGTCGAACGGAGCTTATATTTCAGAAGTTTTCGGATGGACGAGAGATAAGTTTAGTGGCGGACGGGTGAGTAACACGTGAGCAACCTGCCTTTCAGAGGGGGATAACAGTTGGAAACGACTGCTAATACCGCATAACGCTGCGATGGGGCATCCCGATGCAGCCAAAGGAGCAATCCGCTGGAAGATGGGCTCGCGGCCGATTAGCTAGTTGGCGGGGCAACGGCCCACCAAGGCGACGATCGGTAGCCGGACTGAGAGGTTGATCGGCCACATTGGGACTGAGACACGGCCCAG "Bacteria" "Firmicutes" "Clostridia" "Clostridiales" "Ruminococcaceae" …
GATGAACGCTGGCGGCATGCTTAACACATGCAAGTCGGACGGGAAGTGGTGTTTCCAGTGGCGGACGGGTGAGTAACGCGTAAGAACCTGCCCTTGGGAGGGGAACAACAGCTGGAAACGGCTGCTAATACCCCGTAGGCTGAGGAGCAAAAGGAGGAATCCGCCCGAGGAGGGGCTCGCGTCTGATTAGCTAGTTGGTGAGGCAATAGCTTACCAAGGCGATGATCAGTAGCTGGTCCGAGAGGATGATCAGCCACACTGGGACTGAGACACGGCCCAG "Bacteria" "Cyanobacteria" "Oxyphotobacteria" "Chloroplast" NA NA NA
AACGAACGCTGGCGGCGTGGATAAGACATGCAAGTCGAACGAGAGAATTGCTAGCTTGCTAATAATTCTCTAGTGGCGCACGGGTGAGTAACACGTGAGTAACCTGCCCCCGAGAGTGGGATAGCCCTGGGAAACTGGGATTAATACCGCATAGAATCGCAAGATTAAAGCAGCAATGCGCTTGGGGATGGGCTCGCGGCCTATTAGTTAGTTGGTGAGGTAACGGCTCACCAAGGCGATGACGGGTAGCCGGTCTGAGAGGATGTCCGGCCACACTGGAACTGAGACACGGTCCAG "Bacteria" "Verrucomicrobia" "Verrucomicrobiae" "Verrucomicrobiales" "Akkermansiaceae" "Akkermansia" …
GACGAACGCTGGCGGCGTGCTTAACACATGCAAGTCGAACGGAGCACCCTTGAAAGAGATTTCGGTCAATGGATAGGAATGCTTAGTGGCGGACGGGTGAGTAACGCGTGAGGAACCTGCCTTTCAGAGGGGGACAACAGCTGGAAACGGCTGCTAATACCGCATAACACATAGGTGTCGCATGGCATTTATGTCAAAGATTTATCGCTGAGAGATGGCCTCGCGTCTGATTAGCTAGTTGGTAGGGTAACGGCCTACCAAGGCGACGATCAGTAGCCGGACTGAGAGGTTGGCCGGCCACATTGGGACTGAGATACGGCCCAG "Bacteria" "Firmicutes" "Clostridia" "Clostridiales" "Ruminococcaceae" "Ru…
GATGAACGCTGGCGGCGTGCCTAACACATGCAAGTCGAACGGGGTATATAAGCGGAAGTTTACGGATGGAAGGTTATATACTTAGTGGCGGACGGGTGAGTAACGCGTGGGCAACCTGCCCCGTGCCGGGGGATACCGCCTGGAAACAGGCGCTAATACCGCATAAGCGCATACAGCCGCATGGGTGTATGCGGAAAGCTCCGGCGGCACGGGATGGGCCCGCGCCCGATTAGCCAGTTGGCGGGGTAACGGCCCACCAAAGCGACGATCGGTAGCCGGCCTGAGAGGGCGGACGGCCACATTGGGACTGAGACACGGCCCAA "Bacteria" "Firmicutes" "Clostridia" "Clostridiales" "Lachnospiraceae" NA NA
GATGAACGCTAGCGACAGGCTTAACACATGCAAGTCGAGGGGCAGCGGTGGTGAAGGCTTGCCTTTACCAGCCGGCGACCGGCGCACGGGTGAGTAACACGTATGCAACCTGCCTGCCACAGCCGGATAATCGGGAGAAATCCCGTCTAATACGGCATAATGCACCTATGGGACATCCTGTTGGTGCCAAAGGTTAATTCCGGTGGCGGATGGGCATGCGTCGCATTAGTTAGTTGGCGGTGTAACGGACCACCAAGACGACGATGCGTAGGGGTTCTGAGAGGAAGGTCCCCCACACTGGTACTGAGACACGGACCAG "Bacteria" "Bacteroidetes" "Bacteroidia" "Bacteroidales" "Muribaculaceae" NA NA
GACGAACGCTGGCGGCACGCCTAACACATGCAAGTCGAACGGTGAAGGTGGAACTTGTTCCACTCGAACAGTGGCGGACGGGTGAGTAACACGTGAGCAACCTGCCTTTCAGAGGGGGACAACAGTTGGAAACGACTGCTAATACCGCATAAAATAACGGAATCGCATGATTCTGTTATCAAAGGAGAGATCCGCTGAAAGATGGGCTCGCGTCTGATTAGATAGTTGGTGAGGTAACGGCCCACCAAGTCGACGATCAGTAGCCGGACTGAGAGGTTGAACGGCCACATTGGGACTGAGACACGGCCCAG "Bacteria" "Firmicutes" "Clostridia" "Clostridiales" "Ruminococcaceae" "Ruminiclostridi…
GACGAACGCTGGCGGCGTGCTTAACACATGCAAGTCGAACGGAGCACCTTCGAAAGAGACTTCGGTCAATGGAAAAGAATGCTTAGTGGCGGACGGGTGAGTAACGCGTGAGGAACCTGCCTTTCAGTGGGGGACAACAGTTGGAAACGACTGCTAATACCGCATAACGTACGGGTATCGCATGGTATCTGTACCAAAGATTTATCGCTGAGAGATGGCCTCGCGTCTGATTAGCTAGTTGGTAGGGTAACGGCCTACCAAGGCGACGATCAGTAGCCGGACTGAGAGGTTGGCCGGCCACATTGGGACTGAGATACGGCCCAG "Bacteria" "Firmicutes" "Clostridia" "Clostridiales" "Ruminococcaceae" "Ru…
GATGAACGCTGGCGGCGTGCCTAACACATGCAAGTCGAACGGGGGCCAGCGGCGGAAGGGGATGGTTTACCAGACCCGGAAGGCGCGGGCCTTAGTGGCGGACGGGTGAGTAACGCGTGGGGAACCTGCCCCGTACCGGGGGATAACACCTGGAAACAGGTGCTAATACCGCATAACAGAAGGGGACGCATGTTCCTTTCTTGAAAACTCCGGTGGTACGGGATGGACCCGCGTCTGATTAGCTGGTTGGCGGGGTAACGGCCCACCAAGGCGACGATCAGTAGCCGGCCTGAGAGGGCGGACGGCCACATTGGGACTGAGACACGGCCCAA "Bacteria" "Firmicutes" "Clostridia" "Clostridiales" "Lachnospirac…
GATGAACGCTGGCGGCGTGCTTAACACATGCAAGTCGAACGGACTCATATTGAAACCTAGTGATTTATGAGTTAGTGGCGGACGGGTGAGTAACGCGTGGATAACCTGCCGTATACCGGGGGATAACACTTAGAAATAGGTGCTAATACCGTATAAGCGCACGGCTCCGCATGGGGCAGTGTGAAAAACTCCGGTGGTATACGATGGATCCGCGTCTGATTAGCTAGTTGGCGGGGTAACGGCTCACCAAGGCAGCGATCAGTAGCCGGCCTGAGAGGGTGGACGGCCACATTGGGACTGAGACACGGCCCAA "Bacteria" "Firmicutes" "Clostridia" "Clostridiales" "Lachnospiraceae" "Lachnospirace…
GATGAACGCTGGCGGCGTGCTTAACACATGCAAGTCGAACGGGGTACCCTTGACAGAGGCTTCGGCCAATTGATAGGAATACCTAGTGGCGGACGGGTGAGTAACGCGTGAGGAACCTGCCTTGGAGTGGGGAATAACAGTTAGAAATAGCTGCTAATACCGCATAATGCAACTAAGTCGCATGGCTTTGGTTGCCAAAGATTTATCGCTCTAAGATGGCCTCGCGTCTGATTAGATAGTTGGCGGGGTAACGGCCCACCAAGTCGACGATCAGTAGCCGGACTGAGAGGTTGGCCGGCCACATTGGGACTGAGACACGGCCCAG "Bacteria" "Firmicutes" "Clostridia" "Clostridiales" "Ruminococcaceae" "R…
GATAAACGCTGGCGGCGCACATAAGACATGCAAGTCGAACGGACTTAACCGAAATGTTTACATTTTGGAGCGGTTAGTGGCGGACTGGTGAGTAACACGTAAGCAACCTGCCTATTAGAGGGGAATAACAGTGAGAAATCATTGCTAATACCGCATATGCCATAATCACCACATGGTGATAGTGGGAAAGGAGCAATCCGCTAATAGATGGGCTTGCGTCTGATTAGATAGTTGGTGGGGTAACGGCCTACCAAGTCGACGATCAGTAGCCGGACTGAGAGGTTGAACGGCCACATTGGGACTGAGATACGGCCCAG "Bacteria" "Firmicutes" "Clostridia" "Clostridiales" "Ruminococcaceae" "Ruminococ…
GATGAACGCTGGCGGCGTGCCTAACACATGCAAGTCGAACGGAGATATTGCTTGGAAGCTTTTCGAGGTGAAAGAGAAGTATCTTAGTGGCGGACGGGTGAGTAACGCGTGGGCAACCTGCCTCATACAGGGGGATAGCATCGGGAAACTGGTGGTAAAACCGCATAAGCGCACGAAGACGCATGTATTCGTGTGAAAAGGAGAAATCTGGTATGAGATGGACCCGCGTCTGATTAGCTAGTTGGAGTGGTAAAAGCACACCAAGGCGACGATCAGTAGCCGGCCTGAGAGGGTGGACGGCCACATTGGGACTGAGACACGGCCCAG "Bacteria" "Firmicutes" "Clostridia" "Clostridiales" "Lachnospiraceae" …
GACGAACGCTGGCGGCGTGCTTAACACATGCAAGTCGAACGGAGTACCCTCGAAAGAGATTTCGGTCAATGGAGAGGACTACTTAGTGGCGGACGGGTGAGTAACGCGTGAGGAACCTGCCTTTCAGAGGGGGACAACAGTTGGAAACGACTGCTAATACCGCATAACGTACGGGTATCGCATGGTACTGGTACCAAAGATTTATCGCTGAGAGATGGCCTCGCGTCTGATTAGCTAGTTGGTAGGGTAACGGCCTACCAAGGCGACGATCAGTAGCCGGACTGAGAGGTTGGCCGGCCACATTGGGACTGAGATACGGCCCAG "Bacteria" "Firmicutes" "Clostridia" "Clostridiales" "Ruminococcaceae" "Ru…
GATGAACGCTGGCGGCGTGCCTAACACATGCAAGTCGAACGGACTCATATTGAAACCTAGTGATTTATGAGTTAGTGGCGGACGGGTGAGTAACGCGTGGAAAACCTGCCGTATACCGGGGGATAACACTTAGAAATAGGTGCTAATACCGCATAAGCGCACAGCTTCGCATGAAGCAGTGTGAAAAACTCCGGTGGTATACGATGGTTCCGCGTCTGATTAGCTAGTTGGCGGGGTAACGGCCCACCAAGGCAGCGATCAGTAGCCGGCCTGAGAGGGTGAACGGCCACATTGGGACTGAGACACGGCCCAA "Bacteria" "Firmicutes" "Clostridia" "Clostridiales" "Lachnospiraceae" "Lachnospirace…
GATGAACGCTGGCGGCGTGCTTAACACATGCAAGTCGAACGGGGGCGTGATGTGCGAGAGGGATAGTTTACTAGACTTCAAACTTTTCACGCCCTAGTGGCGGACGGGTGAGTAACGCGTGGGTAACCTGCCATATACAGGGGGATAACACTTAGAAATAGGTGCTAATACCGCATAAGCGCACAGGGGCGCATGCCCCGGTGTGAAAAACTCCGGTGGTATATGATGGACCCGCGTCTGATTAGCCAGTTGGCAGGGTAACGGCCTACCAAAGCGACGATCAGTAGCCGGCCTGAGAGGGCGGACGGCCACATTGGGACTGAGACACGGCCCAA "Bacteria" "Firmicutes" "Clostridia" "Clostridiales" "Lachnospi…
GATGAACGCTGGCGGCGTGCTTAACACATGCAAGTCGAACGAACGTAAGGAGCTTGCTCCTTGCGTTAGTGGCGGACGGGTGAGTAACGCGTGAGCAATCTGCCCATATCAGGGGGATAACAGTTAGAAATGACTGCTAATACCGCATATGACCACGGGAAGGCATCTTCCTGAGGTGAAAGATTTATCGGATATGGATGAGCTCGCGTCCCATTAGGTAGTTGGTGAGGTAACGGCCCACCAAGCCGACGATGGGTAGCCGGCCTTAGAGGGTGATCGGCCACATTGGAACTGAGACACGGTCCAA "Bacteria" "Firmicutes" "Clostridia" "Clostridiales" "Clostridiales_vadinBB60_group" NA NA
GATGAACGCTGGCGGCGTGCTTAACACATGCAAGTCGAACGGGGATGCTTATGGAAGGAGTGCTTGCACTTTGGAAATGAGTATCTTAGTGGCGGACGGGTGAGTAACGCGTGGGTAACCTGCCCCATACCGGGGGATACCACCTGGAAACAGGTGCTAATACCGCATAAGCGCACGGGAGCGCATGCTCCTGTGTGAAAAACTCCGGTGGTATGGGATGGACCCGCGTCTGATTAGCCAGTTGGCAGGGTAACGGCCTACCAAAGCGACGATCAGTAGCCGGCCTGAGAGGGTGGACGGCCACATTGGGACTGAGACACGGCCCAA "Bacteria" "Firmicutes" "Clostridia" "Clostridiales" "Lachnospiraceae" …
GACGAACGCTGGCGGCGTGCTTAACACATGCAAGTCGAACGGAGTGCTCCGGAAAGAGATTTCGGTCAATGGATGGAGTTACTTAGTGGCGGACGGGTGAGTAACGCGTGAGGAACCTGCCTTTCAGAGGGGGACAACGGTTGGAAACGACTGCTAATACCGCATAACGCATGGGTATCGCATGGTATCTGTGCCAAAGATTTATCGCTGAGAGATGGCCTCGCGTCTGATTAGCTAGTTGGTGAGGTAACGGCCCACCAAGGCGACGATCAGTAGCCGGACTGAGAGGTTGGCCGGCCACATTGGGACTGAGATACGGCCCAG "Bacteria" "Firmicutes" "Clostridia" "Clostridiales" "Ruminococcaceae" "Ru…
GACGAACGCTGGCGGCGTGCTTAACACATGCAAGTCGAACGGAGCACCCCTGAAAGAGTTTTCGGACAATGGAAGGGAATGCTTAGTGGCGGACTGGTGAGTAACGCGTGAGGAACCTGCCTTCCAGAGGGGGACAACAGTTGGAAACGACTGCTAATACCGCATGATGTGTTTCGATGGCATCATCGAGACACCAAAGATTTATCGCTGGAAGATGGCCTCGCGTCTGATTAGCTAGTAGGCGGGGTAACGGCCCACCTAGGCGACGATCAGTAGCCGGACTGAGAGGTTGACCGGCCACATTGGGACTGAGATACGGCCCAG "Bacteria" "Firmicutes" "Clostridia" "Clostridiales" "Ruminococcaceae" "Os…
GATGAACGCTGGCGGCGTGCTTAACACATGCAAGTCGAACGGACTCATATTGAAACCTAGTGATGTATGAGTTAGTGGCGGACGGGTGAGTAACGCGTGGAGAACCTGCCGTATACTGGGGGATAACACTTAGAAATAGGTGCTAATACCGCATAAGCGCACAGCTTCGCATGAAGCAGTGTGAAAAACTCCAGTGGTATACGATGGATCCGCGTCTGATTAGCTTGTTGGCGGGGTAAAGGCCCACCAAGGCGACGATCAGTAGCCGGCCTGAGAGGGTGAACGGCCACATTGGGACTGAGACACGGCCCAA "Bacteria" "Firmicutes" "Clostridia" "Clostridiales" "Lachnospiraceae" "Lachnospirace…
GACGAACGCTGGCGGCGTGCCTAATACATGCAAGTCGAACGAACGGAGGAAGAGCTTGCTCTTCCAAAGTTAGTGGCGGACGGGTGAGTAACACGTGGGCAACCTGCCTGTAAGTTGGGGATAACTCCGGGAAACCGGGGCTAATACCGAATGATAAAGTGTGGCGCATGCCACGCTTTTGAAAGATGGTTTCGGCTATCGCTTACAGATGGGCCCGCGGTGCATTAGCTAGTTGGTAGGGTAATGGCCTACCAAGGCAACGATGCATAGCCGACCTGAGAGGGTGATCGGCCACACTGGGACTGAGACACGGCCCAG "Bacteria" "Firmicutes" "Bacilli" "Bacillales" "Listeriaceae" "Listeria" "monocy…
GATGAACGCTAGCGGCAGGCTTAACACATGCAAGTCGAGGGGCAGCATGGGGAGTAGCAATACTCTCTGATGGCGACCGGCGCAAGGGTGCGTAACGCGTGAGCAACTTGCCCTCATCAGGGGAATAATCGCTGGAAACGGCGTCTAATGCCCCATGGTGATGTCCTCAGGCATCTGAGGTCATCTAAAGATCCGTCGGATGGGGATAGGCTCGCGTGACATTAGCTAGACGGCGGGGTAACGGCCCACCGTGGCGACGATGTCTAGGGGTTCTGAGAGGAAGGTCCCCCACACTGGAACTGAGACACGGTCCAG "Bacteria" "Bacteroidetes" "Bacteroidia" "Bacteroidales" "Rikenellaceae" "Rikenella…
GACGAACGCTGGCGGCGTGCTTAACACATGCAAGTCGAACGGAGTGCCTCGGAAAGAGATTTCGGTCAATGGAAGAGGTTACTTAGTGGCGGACGGGTGAGTAACGCGTGAGGAACCTGCCTTTCAGAGGGGGACAACAGCTGGAAACGGCTGCTAATACCGCATAACATATAGGTATCGCATGGTGTCTATATCAAAGATTTATCGCTGAAAGATGGCCTCGCGTCTGATTAGCTAGTTGGTAGGGTAACGGCCTACCAAGGCGACGATCAGTAGCCGGACTGAGAGGTTGGCCGGCCACATTGGGACTGAGATACGGCCCAG "Bacteria" "Firmicutes" "Clostridia" "Clostridiales" "Ruminococcaceae" "Ru…
GATGAACGCTGGCGGCGTGCTTAACACATGCAAGTCGAACGAGAACCAATGGAATGAGGATTCGTCCAAAGGAAGTTGGGGAAAGTGGCGGACGGGTGAGTAACGCGTGAGCAATCTGCCTTGGAGTGGGGAATAACGGTTGGAAACAGCCGCTAATACCGCATGATACAGCTATCCCGCATGGGGTTGGCTGTCAAAGATTTATCGCTCTGAGATGAGCTCGCGTCTGATTAGCTTGTTGGCGGGGTAACGGCCCACCAAGGCGACGATCAGTAGCCGGACTGAGAGGTTGGCCGGCCACATTGGGACTGAGACACGGCCCAG "Bacteria" "Firmicutes" "Clostridia" "Clostridiales" "Ruminococcaceae" NA …
GACGAACGCTGGCGGCGTGCTTAACACATGCAAGTCGAACGGACCTTTTTTGGAAGAAGCCTTCGGGTGGAAATTAGGAAAGGTTAGTGGCGGACGGGTGAGTAACGCGTAGATAATCTACCTTAAAGACTGGGACAACAGTTGGAAACGACTGCTAATACCGGATACGCTGCACATAGGGCATCCTAGGTGCAGGAAAAGAGGCCTCTTAACAATGCTCCTGCTTTTAGATGAGTCTGCGTCTGATTAGCTAGATGGTGGGGTAACGGCTTACCATGGCGACGATCAGTAGTCGGCCTGAGAGGGTGACCGGCCACATTGGGACTGAGACACGGCCCAA "Bacteria" "Firmicutes" "Clostridia" "Clostridiales" "Pept…
GATGAACGCTGGCGGCGTGCTTAACACATGCAAGTCGAACGGAGTTATCATTTTTGAAGCAAATAGCTTGCTAGGAGTGGAGATATTGATAACTTAGTGGCGGACGGGTGAGTAACGCGTGGGTAACCTGCCGTATACAGGGGGATAACACTTAGAAATAGGTGCTAATACCGCATAAGCGCACGGTTCCGCATGGGACAGTGTGAAAAACCGAGGTGGTATACGATGGACCCGCGTCTGATTAGCCAGTTGGCAGGGTAACGGCCTACCAAAGCGACGATCAGTAGCCGGCCTGAGAGGGCGGACGGCCACATTGGGACTGAGACACGGCCCAA "Bacteria" "Firmicutes" "Clostridia" "Clostridiales" "Lachnospi…
GACGAACGCTGGCGGCGTGCTTAACACATGCAAGTCGAACGGGGTGCCCATGAAGGAGATTTCGGTCAACGGATTGGGTTACTTAGTGGCGGACGGGTGAGTAACGCGTGAGGAACCTGCCTTTCAGAGGGGGACAACAGTTGGAAACGACTGCTAATACCGCATAACATGTAGGTGTCGCATGGCATTTACATCAAAGATTTATCGCTGAGAGATGGCCTCGCGTCTGATTAGCTAGTTGGTAGGGTAACGGCCTACCAAGGCGACGATCAGTAGCCGGACTGAGAGGTTGGCCGGCCACATTGGGACTGAGATACGGCCCAG "Bacteria" "Firmicutes" "Clostridia" "Clostridiales" "Ruminococcaceae" "Ru…
GATGAACGCTAGCGACAGGCTTAACACATGCAAGTCGAGGGGCAGCGGGGAGCAAGCTTGCTTGCTCTGCCGGCGACCGGCGCACGGGTGAGTAACACGTATGCAACCTGCCCTCCGCAGGGGGATAACCCGGAGAAATCCGGACTAATACCGCGTGGTACACCAGTGGGGCATCCCACGGGTGTTAAAAGGAAGCGATTCCGGCGGAGGATGGGCATGCGGCGCATTAGCTAGTTGGCGGGGTAACGGCCCACCAAGGCGACGATGCGTAGGGGTTCTGAGAGGAAGGTCCCCCACACTGGTACTGAGACACGGACCAG "Bacteria" "Bacteroidetes" "Bacteroidia" "Bacteroidales" "Muribaculaceae" NA NA
GATGAACGCTAGCGGCAGGCTTAACACATGCAAGTCGAGGGGCAGCGAGAGTGATAGCAATATTACTTGTCGGCGACCGGCGCACGGGTGCGTAACGCGTATGCAACCTACCATCAACAGGGGGATAACACTGAGAAATTGGTACTAATACCCCATAATATCTCATGCGGCATCGCATGGGGTTGAAAACTCCGGTGGTTGATGATGGGCATGCGTTGTATTAGCTGGTTGGTGAGGTAACGGCTCACCAAGGCGACGATACATAGGGGGACTGAGAGGTTAACCCCCCACATTGGTACTGAGACACGGACCAA "Bacteria" "Bacteroidetes" "Bacteroidia" "Bacteroidales" "Rikenellaceae" "Alistipes"…
GATGAACGCTGGCGGCGTGCCTAACACATGCAAGTCGAACGGGGGAGCATGAGGAAGAAAGCGCGTGCGTTTTCGGAATCATGTTTTCCAGTGGCGGACGGGTGAGTAACGCGTGGGCAACCTGCCCTGTACAGGGGGATACCATCTGGAAACAGATGCTAATACCGCATAACCGCATCAGCCCGCATGGGCAGATGCGGAAAGGGAGCGATCCCGGTACAGGATGGACCCGCGTCTGATTAGCCAGTTGGCAGGGTAACGGCCTACCAAAGCGACGATCAGTAGCCGGCCTGAGAGGGTGGACGGCCACATTGGGACTGAGACACGGCCCAG "Bacteria" "Firmicutes" "Clostridia" "Clostridiales" "Lachnospira…
GATGAACGCTGGCGGCGTGCTTAACACATGCAAGTCGAACGGGGATGGTACATGCGAGGGAGTAGTTTACTATGACCAGACAAGTGCCATCCTAGTGGCGGACGGGTGAGTAACGCGTGGGCAACCTGCCCTGTACAGGGGGATAACACTTAGAAATAGGTGCTAATACCGCATGAGCGCACAAAGGCGCATGCCTATGTGCGGGAAGCCCGCGAGGGCGGTACGGGATGGGCCCGCGTCTGATTAGCCAGTTGGCAGGGTAACGGCCTACCAAAGCGACGATCAGTAGCCGGCCTGAGAGGGTGGACGGCCACATTGGGACTGAGACACGGCCCAA "Bacteria" "Firmicutes" "Clostridia" "Clostridiales" "Lachnos…
GATGAACGCTGGCGGCGTGCCTAACACATGCAAGTCGAACGGACTTATAACGAAACCTAGTGAATTATAAGTTAGTGGCGGACGGGTGAGTAACGCGTGGAAAACCTGCCGTATACTGGGGGATAACACTTAGAAATAGGTGCTAATACCGCATAAGCGCACAGCTTCGCATGAAGCAGTGTGAAAAACTCCGGTGGTATACGATGGTTCCGCGTCTGATTAGCTAGTTGGTGAGGTAAAAGCCCACCAAGGCAACGATCAGTAGCCGGCCTGAGAGGGTGAACGGCCACATTGGGACTGAGACACGGCCCAG "Bacteria" "Firmicutes" "Clostridia" "Clostridiales" "Lachnospiraceae" "Lachnospirace…
GATGAACGCTGGCGGCGTGCTTAACACATGCAAGTCGAACGGACATATACCGAAACCTAGTGAAGTATATGTTAGTGGCGGACGGGTGAGTAACGCGTGGATAACCTGCCGTGCACAGGGGGATAACACTTAGAAATAGGTGCTAATACCGCATAAGCGCACAGTTTCGCATGAGACAGTGTGAAAAGCCTGGAAGCGATTCCGGGCGGTGCATGATGGATCCGCGTCCGATTAGCTAGTTGGCGGGGTAAAGGCCCACCAAGGCAGCGATCGGTAGCCGGCCTGAGAGGGTGGACGGCCACATTGGGACTGAGACACGGCCCAA "Bacteria" "Firmicutes" "Clostridia" "Clostridiales" "Lachnospiraceae" "A…
ATTGAACGCTGGCGGCAGGCCTAACACATGCAAGTCGAACGGTAACAGAAAGCAGCTTGCTGCTTTGCTGACGAGTGGCGGACGGGTGAGTAATGTCTGGGAAACTGCCTGATGGAGGGGGATAACTACTGGAAACGGTAGCTAATACCGCATAACGTCGCAAGACCAAAGAGGGGGACCTTCGGGCCTCTTGCCATCGGATGTGCCCAGATGGGATTAGCTAGTAGGTGGGGTAACGGCTCACCTAGGCGACGATCCCTAGCTGGTCTGAGAGGATGACCAGCCACACTGGAACTGAGACACGGTCCAG "Bacteria" "Proteobacteria" "Gammaproteobacteria" "Enterobacteriales" "Enterobacteriacea…
GATGAACGCTAGCGGCAGGCTTAACACATGCAAGTCGGGCGGCAGCGGGGTGGGAGCTTGCTCCCACTGCCGGCGAGCGGCGCACGGGTGAGTAACACGTATGCAACCTGCCCCTGTCAGGGGGACAACCCGCCGAAAGGCGGGCTAAGCCCGCGTATATCTCCCCGGGGCATCCCGGGGGGAGGAAAGGAGCGATCCGGACAGGGATGGGCATGCGGCGCATTAGCTGGTCGGCGGGGTAACGGCCCACCGAGGCGACGATGCGTAGGGGTTCTGAGAGGAAGGCCCCCCACACTGGTACTGAGACACGGACCAG "Bacteria" "Bacteroidetes" "Bacteroidia" "Bacteroidales" "Muribaculaceae" NA NA
GATGAACGCTGGCGGCGTGCTTAACACATGCAAGTCGAACGGGGTGCCTTTGAAAGAGGATTCGTCCAATTGAGAAGGTTACCTAGTGGCGGACGGGTGAGTAACGCGTGAGTAACCTGCCTTGGAGTGGGGAATAACACATCGAAAGATGTGCTAATACCGCATAATGCAGTTGGGCCGCATGGCTCTGACTGCCAAAGATTTATCGCTCTGAGATGGACTCGCGTCTGATTAGCTGGTTGGCGGGGTAACGGCCCACCAAGGCGACGATCAGTAGCCGGACTGAGAGGTTGACCGGCCACATTGGGACTGAGACACGGCCCAG "Bacteria" "Firmicutes" "Clostridia" "Clostridiales" "Ruminococcaceae" "R…
GATGAACGCTAGCGACAGGCTTAACACATGCAAGTCGAGGGGCATCATGATGTAGCAATACATTGATGGCGACCGGCGCACGGGTGAGTAACGCGTATGCAACCTGGCTGATACAGGGGTATAGCCCATGGAAACGTGGATTAATCCCCCATACCATTAATATGTGGCATCTTATATTAATGAAATCTTCGGAGGTATCAGATGGGCATGCGTCCTATTAGCTAGTTGGCGGGGTAACGGCCCACCAAGGCGATGATAGGTAGGGGTTCTGAGAGGAAGGTCCCCCACATTGGAACTGAGACACGGTCCAA "Bacteria" "Bacteroidetes" "Bacteroidia" "Bacteroidales" "Marinifilaceae" "Odoribacter"…
GACGAACGCTGGCGGCGTGCTTAACACATGCAAGTCGAACGGAGCGCCTATGAAGGAGATTTCGGTCAACGGAATAGGCTGCTTAGTGGCGGACGGGTGAGTAACGCGTGAGGAACCTGCCTTTCAGAGGGGGACAACAGTTGGAAACGACTGCTAATACCGCATAACACATAGGTGTCGCATGGCATTTATGTCAAAGATTTATCGCTGAAAGATGGCCTCGCGTCTGATTAGCTAGTTGGTGAGGTAACGGCTCACCAAGGCGACGATCAGTAGCCGGACTGAGAGGTTGGCCGGCCACATTGGGACTGAGATACGGCCCAG "Bacteria" "Firmicutes" "Clostridia" "Clostridiales" "Ruminococcaceae" "Ru…
GATGAACGCTGGCGGCGTGCTTAACACATGCAAGTCGAACGAAGCATGTAAAACAATCCTTCGGGTGCGTTTTATATGACTGAGTGGCGGACGGGTGAGTAACGCGTGGGGAACCTGCCGTATGCAGGGGGACAACAGTCAGAAATGACTGCTAATACCGCATAAGCACACAATGCTGCATGGCATGGTGTGAAAAGATTTATCGGCATACGATGGCCCCGCGTCTGATTAGCCAGTTGGCAGGGTAACGGCCTACCAAAGCAACGATCAGTAGCCGGCTTGAGAGAGTGACCGGCCACATTGGGACTGAGACACGGCCCAG "Bacteria" "Firmicutes" "Clostridia" "Clostridiales" "Lachnospiraceae" NA NA
GATGAACGCTGGCGGCGTGCCTAACACATGCAAGTCGAACGGACTTATAACGAAACCTAGTGAATTATAAGTTAGTGGCGGACGGGTGAGTAACGCGTGGAAAACCTGCCGTATACTGGGGGATAACACTTAGAAATAGGTGCTAATACCGCATAAGCGCACAGCTTCGCATGAAGCAGTGTGAAAAACTCCGGTGGTATACGATGGTTCCGCGTCTGATTAGCTAGTTGGTGAGGTAAAAGCCCACCAAGGCGACGATCAGTAGCCGGCCTGAGAGGGTGAACGGCCACATTGGGACTGAGACACGGCCCAG "Bacteria" "Firmicutes" "Clostridia" "Clostridiales" "Lachnospiraceae" "Lachnospirace…
GATGAACGCTAGCGACAGGCTTAACACATGCAAGTCGAGGGGCAGCGGGGAAGTAGCAATACTTCCGCCGGCGACCGGCGCACGGGTGAGTAACACGTATGGAACCTGCCCGTAGCAGGGGGATAAGCGGAAGAAATTCCGTCTAATACCGCGTAATAACTCCGAGGGGCATCTCTTGGGGTTTAAAGGGTAACACCGGCTACGGATGGCCATGCGGCGCATTAGCTAGTTGGCGGGGTAACGGCCCACCAAGGCGACGATGCGTAGGGGTTCTGAGAGGAAGGTCCCCCACACTGGTACTGAGACACGGACCAG "Bacteria" "Bacteroidetes" "Bacteroidia" "Bacteroidales" "Muribaculaceae" NA NA
GATGAACGCTGGCGGCGTGCTTAACACATGCAAGTCGAACGGGGTACCCCCAAAGGAGTTTTCGGACAACTGCGGGGAATACCTAGTGGCGGACGGGTGAGTAACGCGTGAGTAACCTGCCTTGGAGTGGGGAATAACAGCTGGAAACAGCTGCTAATACCGCATAATGCAGTTGGGTCGCATGGCTCTGACTGCCAAAGATTTATCGCTCTGAGATGGACTCGCGTCTGATTAGCTAGTTGGTGGGGCAACGGCCCACCAAGGCGACGATCAGTAGCCGGACTGAGAGGTTGGCCGGCCACATTGGGACTGAGACACGGCCCAG "Bacteria" "Firmicutes" "Clostridia" "Clostridiales" "Ruminococcaceae" "R…
GATGAACGCTGGCGGCGTGCCTAACACATGCAAGTCGAACGGACAGATATGGAAACCTAGTGAAATATCTGTTAGTGGCGGACGGGTGAGTAACGCGTGGATAACCTGCCATATACAGGGGGATAACACTTAGAAATAGGTGCTAATACCGCATAAGCGCACAGCTTCGCATGAAGGAGTGTGAAAAACCACGGTGGTATATGATGGATCCGCGTCTGATTAGCCAGTTGGTGAGGTAACGGCTCACCAAAGCGACGATCAGTAGCCGGCCTGAGAGGGCGGACGGCCACATTGGGACTGAGACACGGCCCAG "Bacteria" "Firmicutes" "Clostridia" "Clostridiales" "Lachnospiraceae" "Lachnospirace…
GATGAACGCTGGCGGCGTGCCTAACACATGCAAGTCGAGCGAAGCAATTAAGAGGAAGTTTTCGGATGGAATGTTAATTGACTGAGCGGCGGACGGGTGAGTAACGCGTGGGTAACCTGCCTCATACAGGGGGATAACAGTTAGAAATGACTGCTAATACCGCATAAGCACACAGAACCGCATGGTTCGGGGTGAAAAGCCGAGACGGTATGAGATGGACCCGCGTCTGATTAGCTAGTTGGAGGGGTAACGGCCCACCAAGGCAACGATCAGTAGCCGACCTGAGAGGGTGACCGGCCACATTGGGACTGAGACACGGCCCAA "Bacteria" "Firmicutes" "Clostridia" "Clostridiales" "Lachnospiraceae" NA …
GACGAACGCTGGCGGCGTGCCTAATACATGCAAGTCGAGCGGACAGATGGGAGCTTGCTCCCTGATGTTAGCGGCGGACGGGTGAGTAACACGTGGGTAACCTGCCTGTAAGACTGGGATAACTCCGGGAAACCGGGGCTAATACCGGATGCTTGTTTGAACCGCATGGTTCAAACATAAAAGGTGGCTTCGGCTACCACTTACAGATGGACCCGCGGCGCATTAGCTAGTTGGTGAGGTAATGGCTCACCAAGGCGACGATGCGTAGCCGACCTGAGAGGGTGATCGGCCACACTGGGACTGAGACACGGCCCAG "Bacteria" "Firmicutes" "Bacilli" "Bacillales" "Bacillaceae" "Bacillus" NA
GATGAACGCTGGCGGCGTGCTTAACACATGCAAGTCGAACGAAGCACTCTTTTAGATTTCCTTCGGGGAAGAAGAAATTGTGACTGAGTGGCGGACGGGTGAGTAACGCGTGGGCAACCTGCCCCATACAGGGGGATAACAGCCGGAAACGGCTGCTAAAACCGCATAAGCGCACAAGGGCCGCATGGCCTGGTGTGAAAAACTCCGGTGGTATGGGATGGGCCCGCGTCTGATTAGCTAGTTGGCGGGGGAGAGGCCCACCAAGGCGACGATCAGTAGCCGACCTGAGAGGGTGGCCGGCCACATTGGGACTGAGACACGGCCCAA "Bacteria" "Firmicutes" "Clostridia" "Clostridiales" "Lachnospiraceae" …
GACGAACGCTGGCGGCGTGCTTAACACATGCAAGTCGAGCGGACGTAGCAATACGTTAGCGGCGGACGGGTGAGTAACGCGTGAGCAATCTGCCTCTGTCATCGGGATAACACTTAGAAATAGGTGCTAATACCGAATAAGACCACGATTCGGCATCGAATTGGGGTAAAAAGGTTACTGGACAGAGATGAGCTCGCGTCCCATTAGGTAGTTGGTGAGGTAACGGCCCACCAAGCCGACGATGGGTAGCCGACCTGAGAGGGTAAACGGCCACATTGGAACTGAGAAACGGTCCAA "Bacteria" "Firmicutes" "Clostridia" "Clostridiales" "Clostridiales_vadinBB60_group" NA NA
GATGAACGCTGGCGGCGTGCCTAACACATGCAAGTCGAGCGAAGCGATTTTGAGGAAGTTTACGGATGGAATTGGAATTGACTGAGCGGCGGACGGGTGAGTAACGCGTGGGTAACCTGCCTCATACAGGGGGATAACAGTTAGAAATGACTGCTAATACCGCATAAGCGCACGGGACCGCATGGTCTTGTGTGAAAAACTCCGGTGGTATGAGATGGACCCGCGTCTGATTAGGTAGTTGGCGGGGTAGCGGCCCACCAAGCCGACGATCAGTAGCCGACCTGAGAGGGTGACCGGCCACATTGGGACTGAGACACGGCCCAA "Bacteria" "Firmicutes" "Clostridia" "Clostridiales" "Lachnospiraceae" NA …
GACGAACGCTGGCGGCGTGCTTAACACATGCAAGTCGAACGGGGCACCCCTGAAGGAGTTTTCGGACAACGGATGGGAATGCTTAGTGGCGGACTGGTGAGTAACGCGTGAGGAACCTGCCTTTCGGAGGGGGACAACAGTTGGAAACGACTGCTAATACCGCATGACACATCGAAGTCGCATGGCTTTGATGTCAAAGATTTATCGCCGAAAGATGGCCTCGCGTCTGATTAGCTTGTTGGTGAGGTAACGGCTCACCAAGGCGACGATCAGTAGCCGGACTGAGAGGTTGGCCGGCCACATTGGGACTGAGATACGGCCCAG "Bacteria" "Firmicutes" "Clostridia" "Clostridiales" "Ruminococcaceae" "Ru…
GACGAACGCTGGCGGCGTGCTTAACACATGCAAGTCGAACGGAGCGCCTATGAAGGAGATTTCGGTCAACGGAATAGGTTGCTTAGTGGCGGACGGGTGAGTAACGCGTGAGGAACCTGCCTTTCAGAGGGGGACAACAGTTGGAAACGACTGCTAATACCGCATAACACATAGGTGTCGCATGGCATTTATGTCAAAGATTTATCGCTGAAAGATGGCCTCGCGTCTGATTAGCTAGTTGGTGAGGTAACGGCTCACCAAGGCGACGATCAGTAGCCGGACTGAGAGGTTGGCCGGCCACATTGGGACTGAGATACGGCCCAG "Bacteria" "Firmicutes" "Clostridia" "Clostridiales" "Ruminococcaceae" "Ru…
GATGAACGCTAGCGGCAGGCTTAACACATGCAAGTCGAGGGGCAGCGAGATCAGTGCTTGCACTGATTGTCGGCGACCGGCGCACGGGTGCGTAACGCGTATGCAACCTACCCATTACAGGGGGATAACACTGAGAAATCGGTACTAATACCCCATAACATCCAGGGAGGCATCTTCTTGGGTTGAAAACTCCGGTGGTAATGGATGGGCATGCGTTGTATTAGTTAGTTGGTGGGGTAACGGCTCACCAAGACAACGATACATAGGGGGACTGAGAGGTTAACCCCCCACATTGGTACTGAGACACGGACCAA "Bacteria" "Bacteroidetes" "Bacteroidia" "Bacteroidales" "Rikenellaceae" "Alistipes"…
GATGAACGCTGGCGGCGTGCCTAACACATGCAAGTCGAACGGACTCATATTGAAACCTAGTGATTTATGAGTTAGTGGCGGACGGGTGAGTAACGCGTGGAAAACCTGCCGTATACCGGGGGATAACACTTAGAAATAGGTGCTAATACCGCATAAGCGCACAGCTTCGCATGAAGCAGTGTGAAAAACTCCGGTGGTATATGATGGTTCCGCGTCTGATTAGCTAGTTGGCGGGGTAACGGCCCACCAAGGCAGCGATCAGTAGCCGGCCTGAGAGGGTGAACGGCCACATTGGGACTGAGACACGGCCCAA "Bacteria" "Firmicutes" "Clostridia" "Clostridiales" "Lachnospiraceae" "Lachnospirace…
GATGAACGCTGGCGGCGTGCCTAACACATGCAAGTCGAACGGGCGCGGCGTGCGGCAGGGGCCTCGGCCCCTGCGGCGCCGCGCGAGTGGCGGACGGGTGAGTAACGCGTGGGCAACCTGCCCTGTACTGGGGGATAACACCTGGAAACAGGTGCTAATACCGCATAAGCGCGCTGTGCCGCATGGCGCGGCGCGGAAAACCCCGGTGGTACAGGATGGGCCCGCGTCTGATTAGCTGGTTGGCAGGGTAACGGCCTACCAAGGCGACGATCAGTAGCCGGCCTGAGAGGGTGGACGGCCACACTGGGACTGAGACACGGCCCAG "Bacteria" "Firmicutes" "Clostridia" "Clostridiales" "Lachnospiraceae" NA…
GATAAACGCTGGCGGCGCACATAAGACATGCAAGTCGAACGGACTTAACTCATTCTTTTAGATTGAGAGCGGTTAGTGGCGGACTGGTGAGTAACACGTAAGCAACCTGCCTATCAGAGGGGAATAACAGTGAGAAATCATTGCTAATACCGCATATGCTCACAGTATCACATGATACAGTGAGGAAAGGAGCAATCCGCTGATAGATGGGCTTGCGCCTGATTAGTTAGTTGGTGGGGTAACGGCCTACCAAGACGACGATCAGTAGCCGGACTGAGAGGTTGAACGGCCACATTGGGACTGAGATACGGCCCAG "Bacteria" "Firmicutes" "Clostridia" "Clostridiales" "Ruminococcaceae" "Ruminococc…
GATGAACGCTGGCGGCATGCCTAAGACATGCAAGTCGAACGAAGTAGTCCAATGAAGATGGAGTGCTTGCACAAAATTGGAATTGGGTTGCTACTTAGTGGCAGACGGGTGAGTAACACGTGGGTAACCTACCTCAGAGACTGGGATAACGTTTAGAAATGAACGCTAATACCAGATGATACGTAATTAGATAACTAGATACGTTAAAAGGAGCATTTGCTTCACTTTGAGATGGGCTTGCGTTGTATTAGCTAGTTGGTGGGGTAATGGCCTACCAAGGCAACGATGCATATCCGAGCTGAGAGGCTGATCGGACACACTGGGACTGAGACACGGCCCAG "Bacteria" "Tenericutes" "Mollicutes" "Mollicutes_RF39" N…
GATGAACGCTAGCGACAGGCTTAACACATGCAAGTCGAGGGGCAGCGGTGGTGAAGGCTTGCCTTCACCAGCCGGCGACCGGCGCACGGGTGAGTAACACGTATGCAACCTGCCTGCCACAGCCGGATAATCGGGAGAAATTCCGTCTAATACGGCATAATGCATCGACGGGACATCCTGTTGGTGCCAAAGGTTAATTCCGGTGGCGGATGGGCATGCGTCGCATTAGTTAGTTGGCGGTGTAACGGACCACCAAGACGACGATGCGTAGGGGTTCTGAGAGGAAGGTCCCCCACACTGGTACTGAGACACGGACCAG "Bacteria" "Bacteroidetes" "Bacteroidia" "Bacteroidales" "Muribaculaceae" NA NA
GATTAACGCTGGCGGCGTGCCTAATACATGCAAGTCGAACGGAAGTACCTTCGGGTACTTTAGTGGCGAACGGGTGAGTAATACATAGGTAACCTACCCTTAAGACGAGGATAGCCATTGGAAACGATGGATAAAACTGGATAGGATATAGAGGAAGAATCTTTTATATTTAAAAGAGAGATCTGCTTAAGGAGGGGCCTGTGGCGCATTAGCTAGTTGGTGGGGTAAGGGCCTACCAAGGCGATGATGCGTAGCCGGACTGAGAGGTTGAACGGCCACAATGGAACTGAGAACGGTCCAT "Bacteria" "Tenericutes" "Mollicutes" "Anaeroplasmatales" "Anaeroplasmataceae" "Anaeroplasma" NA
GACGAACGCTGGCGGCGCGCCTAACACATGCAAGTCGAACGGTGAAGAGGAGCTTGCTCCTCGGATCAGTGGCGGACGGGTGAGTAACACGTGAGCAACCTGCCTTTCAGTGGGGGACAACAGTTGGAAACGACTGCTAATACCGCATAACGTGCCGAGGGGGCATCCCTTTGGTACCAAAGATTTATCGCTGAAAGATGGGCTCGCGTCTGATTAGATAGTTGGTGAGGTAACGGCCCACCAAGTCGACGATCAGTAGCCGGACTGAGAGGTTGATCGGCCACATTGGGACTGAGACACGGCCCAG "Bacteria" "Firmicutes" "Clostridia" "Clostridiales" "Ruminococcaceae" "Ruminiclostridium_6…
GACGAACGCTGGCGGCGTGCCTAATACATGCAAGTCGAGCGAGCTGAACCAGCAGATTCACTTCGGTGATGACGCTGGGAACGCGAGCGGCGGATGGGTGAGTAACACGTGGGTAACCTGCCCTAAAGTCTGGGATACCACTTGGAAACAGGTGCTAATACCGGATAACAACAATAGCTGCATGGCTATTGCTTAAAAGGCGGCGAAAGCTGTCGCTAAAGGATGGACCCGCGGTGCATTAGCTAGTTGGTAAGGTAATGGCTTACCAAGGCGACGATGCATAGCCGAGTTGAGAGACTGATCGGCCACATTGGGACTGAGACACGGCCCAA "Bacteria" "Firmicutes" "Bacilli" "Lactobacillales" "Lactobacillac…
GATAAACGCTGGCGGCGCACATAAGACATGCAAGTCGAACGAACTTAACTCATTCTTTTAGATTGAGAGCGGTTAGTGGCGGACTGGTGAGTAACACGTAAGCAACCTGCCTATCAGAGGGGAATAACAGTGAGAAATCATTGCTAATACCGCATAAGCTAGTAGTATCACATGATACAGCTAGAAAAGGAGTAATCCGCTGATAGATGGGCTTGCGCCTGATTAGCTAGTTGGTGGGGTAACGGCCTACCAAGGCGACGATCAGTAGCCGAACTGAGAGGTTGAACGGCCACATTGGGACTGAGATACGGCCCAG "Bacteria" "Firmicutes" "Clostridia" "Clostridiales" "Ruminococcaceae" "Ruminococc…
GATGAACGCTGGCGGCGTGCTTAACACATGCAAGTCGAACGGGGATGCCATTTTTGAGGCGGTTAGTTTACTAAGCGCCAAGATGCTGGCATCTTAGTGGCGGACGGGTGAGTAACGCGTGGGTAACCTGCCTTATACAGGGGGATAACACTTAGAAATAGGTGCTAATACCGCATAAGCGCACGGGGCTGCATGGCCCAGTGTGAAAAACTCCGGTGGTATAAGATGGACCCGCGTCTGATTAGCTTGTTGGCGGGGTAACGGCCCACCAAGGCGACGATCAGTAGCCGGCCTGAGAGGGTGGACGGCCACATTGGGACTGAGACACGGCCCAA "Bacteria" "Firmicutes" "Clostridia" "Clostridiales" "Lachnospi…
GACGAACGCTGGCGGCGTGCTTAACACATGCAAGTCGAACGGGGTGCCTATGAAAGAGATTTCGGTCAATGGATTAGGTTACTTAGTGGCGGACGGGTGAGTAACGCGTGAGGAACCTGCCTTTCAGAGGGGGACAACAGCTGGAAACGGCTGCTAATACCGCATGACACATATTTATCGCATGGTAGATATGTCAAAGATTTATCGCTGAGAGATGGCCTCGCGTCTGATTAGCTAGTTGGTAGGGTAACGGCCTACCAAGGCGACGATCAGTAGCCGGACTGAGAGGTTGGCCGGCCACATTGGGACTGAGATACGGCCCAG "Bacteria" "Firmicutes" "Clostridia" "Clostridiales" "Ruminococcaceae" "Ru…
GATGAACGCTGGCGGCGTGCCTAACACATGCAAGTCGAACGGACATAATTTGAAACCTAGTGAGAATTATGTTAGTGGCGGACGGGTGAGTAACGCGTGGGTAACCTGCCCCATACCGGGGGATACCAGCCGGAAACGGCTGCTAATACCGCATAAGCGCACAGCTTTGCATGAAGCAGTGTGAAAAACTCCGGTGGTATGGGATGGACCCGCGTCCGATTAGCCAGTTGGCGGGGTAGAGGCCCACCAAAGCGACGATCGGTAGCCGGCCTGAGAGGGCGGACGGCCACATTGGGACTGAGACACGGCCCAA "Bacteria" "Firmicutes" "Clostridia" "Clostridiales" "Lachnospiraceae" "Acetatifactor…
GATGAACGCTGGCGGCGTGCTTAACACATGCAAGTCGAACGAGAACCAACGGATTGAGGATTCGTCCAAATGAAGTTGGGGAAAGTGGCGGACGGGTGAGTAACGCGTGAGCAATCTGCCTTGGAGTGGGGAATAACGGTTGGAAACAGCCGCTAATACCGCATGACGCGTCTGGGAGGCATCTCTCTGGACGCCAAAGATTTATCGCTCTGAGATGAGCTCGCGTCTGATTAGCTAGTTGGCGGGGCAACGGCCCACCAAGGCGACGATCAGTAGCCGGACTGAGAGGTTGGCCGGCCACATTGGGACTGAGACACGGCCCAG "Bacteria" "Firmicutes" "Clostridia" "Clostridiales" "Ruminococcaceae" NA …
GACGAACGCTGGCGGCGTGCTTAACACATGCAAGTCGAACGGAGCACCCCTGAAGGAGTTTTCGGACAACGGAAGGGAATGCTTAGTGGCGGACTGGTGAGTAACGCGTGAGGAACCTGCCTTCCAGAGGGGGACAACAGTTGGAAACGACTGCTAATACCGCATGAAACATTTGAACCGCATGGTTTGAATGTCAAAGATTTATCGCTGGAAGATGGCCTCGCGTCTGATTAGCTAGTAGGCGGGGTAACGGCCCACCTAGGCGACGATCAGTAGCCGGACTGAGAGGTTGACCGGCCACATTGGGACTGAGATACGGCCCAG "Bacteria" "Firmicutes" "Clostridia" "Clostridiales" "Ruminococcaceae" "Os…
ATTGAACGCTGGCGGCAGGCCTAACACATGCAAGTCGAACGGTAACAGAAAGCAGCTTGCTGCTTTGCTGACGAGTGGCGGACGGGTGAGTAATGTCTGGGAAACTGCCTGATGGAGGGGGATAACTACTGGAAACGGTAGCTAATACCGCATAACGTCGCAAGACCAAAGAGGGGGACCTTCGGGCCTCTTGCCATCGGATGTGCCCAGATGGGATTAGCTAGTAGGTGGGGTAAAGGCTCACCTAGGCGACGATCCCTAGCTGGTCTGAGAGGATGACCAGCCACACTGGAACTGAGACACGGTCCAG "Bacteria" "Proteobacteria" "Gammaproteobacteria" "Enterobacteriales" "Enterobacteriacea…
ATTGAACGCTGGCGGCAGGCCTAACACATGCAAGTCGAACGGTAACAGGAAACAGCTTGCTGTTTCGCTGACGAGTGGCGGACGGGTGAGTAATGTCTGGGAAACTGCCTGATGGAGGGGGATAACTACTGGAAACGGTAGCTAATACCGCATAACGTCGCAAGACCAAAGAGGGGGACCTTCGGGCCTCTTGCCATCAGATGTGCCCAGATGGGATTAGCTAGTAGGTGGGGTAACGGCTCACCTAGGCGACGATCCCTAGCTGGTCTGAGAGGATGACCAGCCACACTGGAACTGAGACACGGTCCAG "Bacteria" "Proteobacteria" "Gammaproteobacteria" "Enterobacteriales" "Enterobacteriacea…
GACGAACGCTGGCGGCGTGCCTAATACATGCAAGTCGAACGAACGGAGGAAGAGCTTGCTCTTCCAAAGTTAGTGGCGGACGGGTGAGTAACACGTGGGCAACCTGCCTGTAAGTTGGGGATAACTCCGGGAAACCGGGGCTAATACCGAATGATAAAGTGTGGCGCATGCCATGCTTTTGAAAGATGGTTTCGGCTATCGCTTACAGATGGGCCCGCGGTGCATTAGCTAGTTGGTAGGGTAATGGCCTACCAAGGCAACGATGCATAGCCGACCTGAGAGGGTGATCGGCCACACTGGGACTGAGACACGGCCCAG "Bacteria" "Firmicutes" "Bacilli" "Bacillales" "Listeriaceae" "Listeria" "monocy…
GATGAACGCTGGCGGCGTGCTTAACACATGCAAGTCGAACGAAGCATGGAGGCGGAGGCCCTTCGGGGCGGAAGGCTTTATGACTGAGTGGCGGACGGGTGAGTAACGCGTGGGCAACCTGCCCCATACAGGGGGATAACAGCCGGAAACGGCTGCTAATACCGCATAAGCGCACGGGACCGCATGGTTCTGTGTGAAAAGCCGAGGCGGTATGGGAGGGGCCCGCGTCTGATTAGCTTGTTGGCGGGGCAGCGGCCCACCAAGGCGACGATCAGTAGCCGGCCTGAGAGGGCGGCCGGCCACATTGGGACTGAGACACGGCCCAA "Bacteria" "Firmicutes" "Clostridia" "Clostridiales" "Lachnospiraceae" "…
GATGAACGCTAGCGACAGGCTTAACACATGCAAGTCGAGGGGCAGCGGGGGCGTAGCAATATGCCTGCCGGCGACCGGCGCACGGGTGAGTAACACGTATGTAACCTGCCCTATGCAGGGGGATAACCCGGAGAAATCCGGCCTAATACCGCGTAACACCTTTTGGGAGCATTCCCGGGAGGTTAAAGGAGAGATCCGGCATAGGATGGACATGCGTCGCATTAGGTAGACGGCGGGGTAACGGCCCACCGTGCCGACGATGCGTAGGGGTTCTGAGAGGAAGGCCCCCCACACTGGTACTGAGACACGGACCAG "Bacteria" "Bacteroidetes" "Bacteroidia" "Bacteroidales" "Muribaculaceae" NA NA
GATGAACGCTAGCGACAGGCTTAACACATGCAAGTCGAGGGGCAGCACAGGTAGCAATACCGGGTGGCGACCGGCGCACGGGTGAGTAACGCGTATGCAACTTGCCTATCAGAGGGGGATAACCCGGCGAAAGTCGGACTAATACCGCATGAAGCAGGGGCCCCGCATGGGGATATTTGCTAAAGATTCATCGCTGATAGATAGGCATGCGTTCCATTAGGCAGTTGGCGGGGTAACGGCCCACCAAACCGACGATGGATAGGGGTTCTGAGAGGAAGGTCCCCCACATTGGTACTGAGACACGGACCAA "Bacteria" "Bacteroidetes" "Bacteroidia" "Bacteroidales" "Tannerellaceae" "Parabacteroid…
ATTGAACGCTGGCGGCAGGCCTAACACATGCAAGTCGAACGGTAACAGGAAGCAGCTTGCTGCTTTGCTGACGAGTGGCGGACGGGTGAGTAATGTCTGGGAAACTGCCTGATGGAGGGGGATAACTACTGGAAACGGTAGCTAATACCGCATAACGTCGCAAGACCAAAGAGGGGGACCTTCGGGCCTCTTGCCATCGGATGTGCCCAGATGGGATTAGCTAGTAGGTGGGGTAAAGGCTCACCTAGGCGACGATCCCTAGCTGGTCTGAGAGGATGACCAGCCACACTGGAACTGAGACACGGTCCAG "Bacteria" "Proteobacteria" "Gammaproteobacteria" "Enterobacteriales" "Enterobacteriacea…
GATGAACGCTGGCGGCGTGCCTAACACATGCAAGTCGAACGGAGTTTTAAGACGGAAGTTTTCGGATGGAAGATTTAAAGCTTAGTGGCGGACGGGTGAGTAACGCGTGGGTAACCTGCCTCATACAGGGGAATAACAGTTAGAAATGACTGCTAAAACCGCATAACATGGCGATACCGCATGATATTGCCATCAAATATTTATAGGTATGAGATGGGCCCGCGTCTGATTAGCCAGTTGGCAGGGTAATGGCCTACCAAAGCGACGATCAGTAGCCGGCTTGAGAGAGTGACCGGCCACATTGGGACTGAGACACGGCCCAA "Bacteria" "Firmicutes" "Clostridia" "Clostridiales" "Lachnospiraceae" "Lac…
GATGAACGCTAGCTACAGGCTTAACACATGCAAGTCGAGGGGCAGCATGGGAGTTTGCTTGCAAACTTCCGATGGCGACCGGCGCACGGGTGAGTAACACGTATCCAACCTGCCGATAACTCGGGGATAGCCTTTCGAAAGAAAGATTAATATCCGATAGCATATCAAGATCGCATGATCTTGATATTAAAGAATTTCGGTTATCGATGGGGATGCGTTCCATTAGTTAGTTGGCGGGGTAACGGCCCACCAAGACGACGATGGATAGGGGTTCTGAGAGGAAGGTCCCCCACATTGGAACTGAGACACGGTCCAA "Bacteria" "Bacteroidetes" "Bacteroidia" "Bacteroidales" "Bacteroidaceae" "Bactero…
GATGAACGCTGGCGGCGTGCCTAACACATGCAAGTCGAACGGGTGTACGGGGAGGAAGGCTTCGGCCGGAAAACCTGTGCATGAGTGGCGGACGGGTGAGTAACGCGTGGGCAACCTGGCCTGTACAGGGGGATAACACTTAGAAATAGGTGCTAATACCGCATAACGGGGGAAGCCGCATGGCTTTTCCCTGAAAACTCCGGTGGTACAGGATGGGCCCGCGTCTGATTAGCCAGTTGGCAGGGTAACGGCCTACCAAAGCGACGATCAGTAGCCGGCCTGAGAGGGCGGACGGCCACACTGGGACTGAGACACGGCCCAG "Bacteria" "Firmicutes" "Clostridia" "Clostridiales" "Lachnospiraceae" "Lach…
GATGAACGCTAGCGACAGGCTTAACACATGCAAGTCGAGGGGCAGCGGGGAGGTAGCAATACTTCCGCCGGCGACCGGCGCACGGGTGAGTAACACGTATGGAACCTGCCCGTAGCAGGGGGATAAGCGGAAGAAATTCCGTCTAATACCGCGTAATAACTCCGAGGGGCATCCCTTGGGGTTTAAAGGGTAACACCGGCTACGGATGGCCATGCGGCGCATTAGCTAGTTGGCGGGGCAACGGCCCACCAAGGCGACGATGCGTAGGGGTTCTGAGAGGAAGGTCCCCCACACTGGTACTGAGACACGGACCAG "Bacteria" "Bacteroidetes" "Bacteroidia" "Bacteroidales" "Muribaculaceae" NA NA
GATGAACGCTAGCTACAGGCTTAACACATGCAAGTCGAGGGGCATCATGGCGGTCGCTTGCGACCGCTGATGGCGACCGGCGCACGGGTGCGTAACGCGTATCGAACCTGCCGCATACCCGGGGATAGCCTTGCGAAAGCAAGATTAATACCCGATGTTCTCACTGTTCCGCATGTTACGGTGAGCAAAGAAATTCGGTATGCGATGGCGATGCGTCCCATTAGCTAGTTGGCGGGGTAACGGCCCACCAAGGCTCCGATGGGTAGGGGTTCTGAGAGGAAGGTCCCCCACACTGGAACTGAGACACGGTCCAG "Bacteria" "Bacteroidetes" "Bacteroidia" "Bacteroidales" "Prevotellaceae" "Alloprevo…
GATGAACGCTGGCGGAACGCTTTACACATGCAAGTCGAACGGTAACGAGGAGGAAAGCTTGCTTTCCTCTGTCGACGAGTGGCGAACGGGTGAGTAAGACATCGGAACGTATCCGCTCGTGGGGGACAACTTCCCGAAAGGGGAGCTAATACCGCATGAGATCCGAGGATGAAAGAGGGGGACCCGCGAGGGCCTCTCGCGAGCGGAGCGGCCGATGACTGATTAGCTAGTTGGTAAGGTAAAGGCTTACCAAGGCGACGATCAGTAGCTGGTCTGAGAGGACGACCAGCCACACTGGGACTGAGACACGGCCCAG "Bacteria" "Proteobacteria" "Gammaproteobacteria" "Betaproteobacteriales" "Burkhol…
GATAAACGCTAGCGGCAGGCCTAACACATGCAAGTCGAGGGGCAGCGGAAGAATTACTTCGGTAGTTCTGCCGGCGACCGGCGCACGGGTGCGTAACGCGTATGCAACCTACCTTCAACAGGGGGATAATCCGAAGAAATTTGGTCTAATACCCCATAATATTCAGAGAGGCATCTTTTTGAGTTGAAAACTCCGGTGGTTGAAGATGGGCATGCGTTGTATTAGCTGGATGGTGAGGTAACGGCTCACCATGGCGATGATACATAGGGGGACTGAGAGGTTTTCCCCCCACACTGGTACTGAGACACGGACCAG "Bacteria" "Bacteroidetes" "Bacteroidia" "Bacteroidales" "Rikenellaceae" "Alistipes…
GATGAACGCTAGCTACAGGCTTAACACATGCAAGTCGAGGGGCAGCATGAAAGTTTGCTTGCAAACTTTTGATGGCGACCGGCGCACGGGTGAGTAACACGTATCCAACCTGCCTCATACTCGGGGATAGCCTTTCGAAAGAAAGATTAATACCCGATGTTATAGTCCTACCGCATGATGGGATTATTAAAGAATTTCGGTATGGGATGGGGATGCGTTCCATTAGTTAGTTGGCGGGGTAACGGCCCACCAAGACAACGATGGATAGGGGTTCTGAGAGGAAGGTCCCCCACATTGGAACTGAGACACGGTCCAA "Bacteria" "Bacteroidetes" "Bacteroidia" "Bacteroidales" "Bacteroidaceae" "Bactero…
GATGAACGCTGGCGGCGTGCTTAACACATGCAAGTCGAACGGGGATAAGACAGCGGAAGTAATGCTTGCATTATGGAAGGGGTCATATTCTAGTGGCGGACGGGTGAGTAACGCGTGGGCAACCTGCCTTATACAGGGGGATAACAGCTGGAAACAGCTGCTAATACCGCATAAGCGCACAGTGTCGCATGGCACAGTGTGAAAAACTAAGGTGGTATAAGATGGGCCCGCGTCTGATTAGCTAGTTGGGAGGGTAACGGCCTGCCAAGGCAACGATCAGTAGCCGGCCTGAGAGGGCGGACGGCCACATTGGGACTGAGACACGGCCCAG "Bacteria" "Firmicutes" "Clostridia" "Clostridiales" "Lachnospirace…
GATGAACGCTAGCGACAGGCTTAACACATGCAAGTCGAGGGGCAGCACAGGTAGCAATACCGGGTGGCGACCGGCGCACGGGTGAGTAACGCGTATGCAACTTACCTATCAGAGGGGGATAACCCGGCGAAAGTCGGACTAATACCGCATGAAGCAGGGGCCCCGCATGGGGATATTTGCTAAAGATTCATCGCTGATAGATAGGCATGCGTTCCATTAGGCAGTTGGCGGGGTAACGGCCCACCAAACCGACGATGGATAGGGGTTCTGAGAGGAAGGTCCCCCACATTGGTACTGAGACACGGACCAA "Bacteria" "Bacteroidetes" "Bacteroidia" "Bacteroidales" "Tannerellaceae" "Parabacteroid…
GATGAACGCTGGCGGCGTGCCTAACACATGCAAGTCGAACGGAAACATCCCGTCGATGCGATTTCGGTCAAGTCAAAGGATGTTTTAGTGGCGGACGGGTGAGTAACGCGTGGGCAACCTGCCTTACACCGGGGGATAACACTTAGAAATAGGTGCTAATACCGCATAACAGGAGAACATGCATGTGTTTTCCTTGAAAACCACGGTGGTGTAAGATGGACCCGCGTCTGATTAGCTTGTTGGCAGGGTAACGGCCTACCAAGGCGACGATCAGTAGCCGGCCTGAGAGGGTGGACGGCCACATTGGGACTGAGACACGGCCCAG "Bacteria" "Firmicutes" "Clostridia" "Clostridiales" "Lachnospiraceae" "L…
GATGAACGCTGGCGGCGTGCCTAACACATGCAAGTCGAACGGGTGTACGGGGAGGAAGGCTTCGGCCAGAAAACCTGTGCATGAGTGGCGGACGGGTGAGTAACGCGTGGGCAACCTGGCCTGTACAGGGGGATAACACTTAGAAATAGGTGCTAATACCGCATAACGGGGGAAGCCGCATGGCTTTTCCCTGAAAACTCCGGTGGTACAGGATGGGCCCGCGTCTGATTAGCCAGTTGGCAGGGTAACGGCCTACCAAAGCGACGATCAGTAGCCGGCCTGAGAGGGCGGACGGCCACACTGGGACTGAGACACGGCCCAG "Bacteria" "Firmicutes" "Clostridia" "Clostridiales" "Lachnospiraceae" "Lach…
GATGAACGCTGGCGGCGTGCTTAACACATGCAAGTCGAACGGGGCACCCCTGAAGGAGTTTTCGGACAACTGATGGGACTGCTTAGTGGCGGACGGGTGAGTAACGCGTGAGTAACCTGCCTTGGAGTGGGGAATAACAGCTGGAAACAGCTGCTAATACCGCATAATGCAGTTGGGTCGCATGGCTCTGACTGCCAAAGATTTATCGCTCTGAGATGGACTCGCGTCTGATTAGCTAGTTGGCGGGGTAACGGCCCACCAAGGCGACGATCAGTAGCCGGACTGAGAGGTTGGCCGGCCACATTGGGACTGAGACACGGCCCAG "Bacteria" "Firmicutes" "Clostridia" "Clostridiales" "Ruminococcaceae" "R…
GATGAACGCTGGCGGCGTGCTTAACACATGCAAGTCGAACGGGGATGCCATTTTCGAGGTGATTAGTTTACTAAGAGCCAAGATGTTGGTATCTTAGTGGCGGACGGGTGAGTAACGCGTGGGTAACCTGCCTTATACAGGGGGATAACACTTAGAAATAGGTGCTAATACCGCATAAGCGCACGGGGCTGCATGGCCCAGTGTGAAAAACTCCGGTGGTATAAGATGGACCCGCGTCTGATTAGCTTGTTGGCGGGGTAACGGCCCACCAAGGCGACGATCAGTAGCCGGCCTGAGAGGGTGGACGGCCACATTGGGACTGAGACACGGCCCAA "Bacteria" "Firmicutes" "Clostridia" "Clostridiales" "Lachnospi…
GATGAACGCTGGCGGCGTGCCTAACACATGCAAGTCGAACGGGGGCAGATTGAAACCTAGTGATATCTGCCCGAGTGGCGGACGGGTGAGTAACGCGTGGACAACCTGCCGTATGCAGGGGGATACCAGCTGGAAACAGCTGCTAATACCGCATATGCGCACAGGGCCGCATGGCCTGGTGCGGAAAGGAGCAATCCGGCATACGATGGGTCCGCGTCCGATTAGCTAGTTGGCGGGGCAGCGGCCCACCAAGGCGACGATCGGTAGCCGGCCTGAGAGGGCGGACGGCCACATTGGGACTGAGACACGGCCCAG "Bacteria" "Firmicutes" "Clostridia" "Clostridiales" "Lachnospiraceae" NA NA
GATGAACGCTGGCGGCGTGCCTAACACATGCAAGTCGAACGGAGTTACGATGAAACCTAGTGATTCGTAACTTAGTGGCGGACGGGTGAGTAACGCGTGGATAACCTGCCTTACACTGGGGGATAACACTTAGAAATAGGTGCTAATACCGCATAAGCGCACGGAGCCGCATGGCTTAGTGTGAAAAACTCCGGTGGTGTAAGATGGATCCGCGTCTGATTAGCTGGTTGGCGGGGTAGAAGCCCACCAAGGCGACGATCAGTAGCCGGCCTGAGAGGGTGAACGGCCACATTGGGACTGAGACACGGCCCAA "Bacteria" "Firmicutes" "Clostridia" "Clostridiales" "Lachnospiraceae" "Lachnospirace…
GATAAACGCTGGCGGCGCACATAAGACATGCAAGTCGAACGGACTTAACTCATTCTTTTAGATTGAGAGCGGTTAGTGGCGGACTGGTGAGTAACACGTAAGCAACCTGCCTATCAGAGGGGAATAACAGTGAGAAATCATTGCTAATACCGCATAAGCTAGTAGTATCGCATGATATAGCTAGAAAAGGAGCAATCCGCTGATAGATGGGCTTGCGTCTGATTAGCTAGTTGGTGGGGTAACGGCCTACCAAGGCGACGATCAGTAGCCGGACTGAGAGGTTGAACGGCCACATTGGGACTGAGATACGGCCCAG "Bacteria" "Firmicutes" "Clostridia" "Clostridiales" "Ruminococcaceae" "Ruminococc…
GATGAACGCTGGCGGCGTGCTTAACACATGCAAGTCGAACGGGGATGCATTTGGAAGGTGTGCTTGCATACCGGAAGGATGTATCCTAGTGGCGGACGGGTGAGTAACGCGTGGGTAACCTGCCTCATACAGGGGGATACCACCTGGAAACAGGTGCTAATACCGCATAAGCGCACGAGGACGCATGTTTTTGTGTGAAAAACTTAGGTGGTATGAGATGGACCCGCGTCTGATTAGCCAGTTGGCAGGGTAACGGCCTACCAAAGCGACGATCAGTAGCCGGCCTGAGAGGGTGGACGGCCACATTGGGACTGAGACACGGCCCAA "Bacteria" "Firmicutes" "Clostridia" "Clostridiales" "Lachnospiraceae" …
GATGAACGCTGGCGGCGTGCTTAACACATGCAAGTCGAGCGAAGCGTATTAGCGGAAGTTTTCGGATGGAAGCGGATATGACTTAGCGGCGGACGGGTGAGTAACGCGTGGATAACCTGCCTCATACAGGGGGATAACAGTTAGAAATGACTGCTAATACCGCATAAGCGCACAGGACCGCATGGTCCGGTGTGAAAAACTCCGGTGGTATGGGATGGATCCGCGTCTGATTAGCTGGTTGGTGAGGTAACGGCCCACCAAGGCGACGATCAGTAGCCGACCTGAGAGGGTGGCCGGCCACATTGGGACTGAGACACGGCCCAA "Bacteria" "Firmicutes" "Clostridia" "Clostridiales" "Lachnospiraceae" NA …
GATGAACGCTGGCGGCGTGCTTAACACATGCAAGTCGAACGAAGCACTTAGGAAAGATTCTTCGGATGAAAGCCTTTGTGACTGAGTGGCGGACGGGTGAGTAACGCGTGGGTAACCTACCTCATACAGGGGGATAACAGTTGGAAACGACCGCTAATACCGCATAAGCCAACAGAACCGCATGGTTTAGTTGGAAAAGATTGATCGGTATGAGATGGACCCGCGTCTGATTAGCCAGTTGGCAGGGTAACGGCCTACCAAAGCGACGATCAGTAGCCGGCCTGAGAGGGTGAACGGCCACATTGGGACTGAGACACGGCCCAA "Bacteria" "Firmicutes" "Clostridia" "Clostridiales" "Lachnospiraceae" NA …
GATGAACGCTGGCGGCGTGCCTAACACATGCAAGTCGAACGGGGGCAGATTGAAACCTAGTGATATCTGCCCGAGTGGCGGACGGGTGAGTAACGCGTGGACAACCTGCCGCATGCAGGGGGATACCGGCTGGAAACAGCCGCTAATACCGCATATGCGCACGGCGCCGCATGGCGCCGCGCGGAAAGGGAGCGATTCCGGCATGCGATGGGTCCGCGTCCGATTAGCTGGTTGGCGGGGCAGCGGCCCACCAAGGCGACGATCGGTAGCCGGCCTGAGAGGGCGGACGGCCACATTGGGACTGAGACACGGCCCAG "Bacteria" "Firmicutes" "Clostridia" "Clostridiales" "Lachnospiraceae" NA NA
GATGAACGCTGGCGGCGTGCTTAACACATGCAAGTCGAACGGACGTAGGGAGCTTGCTCCCTGCGTTAGTGGCGGACGGGTGAGTAACGCGTGAGCAATCTGCCCATATCTGGGGGATAACAGTTAGAAATGACTGCTAATACCGCATATGACCACGGGAAGGCATCTTTCCGGGGTGAAAGATTTATCGGATATGGATGAGCTCGCGTCCCATTAGGTAGTTGGTGAGGTAACGGCCCACCAAGCCGACGATGGGTAGCCGGCCTTAGAGGGTGATCGGCCACATTGGAACTGAGACACGGTCCAA "Bacteria" "Firmicutes" "Clostridia" "Clostridiales" "Clostridiales_vadinBB60_group" NA NA
GACGAACGCTGGCGGCGTGCTTAACACATGCAAGTCGAACGGAGCACCCCTGAAGGAGTTTTCGGACAACGGATGGGAATGCTTAGTGGCGGACTGGTGAGTAACGCGTGAGGAACCTGCCTTCCAGAGGGGGACAACAGTTGGAAACGACTGCTAATACCGCATGATGCGTTGGAGCCGCATGACTCCGACGTCAAAGATTTATCGCTGGAAGATGGCCTCGCGTCTGATTAGCTAGTTGGTGAGGTAACGGCCCACCAAGGCGACGATCAGTAGCCGGACTGAGAGGTTGGCCGGCCACATTGGGACTGAGATACGGCCCAG "Bacteria" "Firmicutes" "Clostridia" "Clostridiales" "Ruminococcaceae" "Os…
GACGAACGCTGGCGGCATGCCTAACACATGCAAGTCGAACGGGGATAGCAATATCCTAGTGGCGAACGGGTGAGTAACGCGTGAGTAACCTGCCTCATACAACGGGATACCCGAGGGAAACTTCGGTTAATACGGTATAAGACCACACTACCGCATGGTAGAGGGGTAAAAGGGGCAACCTGGTATGAGATGGACTCGCGTCGCATTAGCTAGTTGGTGAGGTAACGGCCCACCAAGGCGACGATGCGTAGCCGACCTGAGAGGGTGATCGGCCACATTGGGACTGAGATACGGCCCAG "Bacteria" "Firmicutes" "Clostridia" "Clostridiales" "Clostridiales_vadinBB60_group" NA NA
GATGAACGCTGGCGGCGTGCCTAACACATGCAAGTCGAGCGAAGCACTTCATTAGAACTCTTCGGAGGGACGAGGAAGTGACTGAGCGGCGGACGGGTGAGTAACGCGTGGGCAACCTGCCTTACACAGGGGGATAACAGTTAGAAATGACTGCTAATACCGCATAAGACCACATTGCCGCATGGCAGGGTGGTAAAAACTCCGGTGGTGTAAGATGGGCCCGCGTCTGATTAGGTAGTTGGCAGGGTAGAGGCCTACCAAGCCTACGATCAGTAGCCGGCCTGAGAGGGTGGACGGCCACATTGGGACTGAGACACGGCCCAA "Bacteria" "Firmicutes" "Clostridia" "Clostridiales" "Lachnospiraceae" "La…
GATGAACGCTGGCGGCATGCCTAACACATGCAAGTCGAACGGGGTTTATATGACGGAACTCTCCGGAGGGAAGATATATAAACCTAGTGGCGGACGGGTGAGTAACGCGTGGGCAACCTGCCCTGTACCGGGGGACAACAGCCAGAAATGGCTGCTAATACCGCATAAGCCTGCTGTGCCGCATGGCACAGCAGGGAAAACCACGGTGGTACAGGATGGGCCCGCGTCTGATTAGTTAGTTGGCAGGGTAACGGCCTACCAAGACAACGATCAGTAGCCGGCTTGAGAGAGTGGACGGCCACATTGGGACTGAGACACGGCCCAG "Bacteria" "Firmicutes" "Clostridia" "Clostridiales" "Lachnospiraceae" "L…
ATTGAACGCTGGCGGCAGGCCTAACACATGCAAGTCGAACGGTAACAGGAAGAAGCTTGCTTCTTTGCTGACGAGTGGCGGACGGGTGAGTAATGTCTGGGAAACTGCCTGATGGAGGGGGATAACTACTGGAAACGGTAGCTAATACCGCATAACGTCGCAAGACCAAAGAGGGGGACCTTCGGGCCTCTTGCCATCGGATGTGCCCAGATGGGATTAGCTAGTAGGTGGGGTAACGGCTCACCTAGGCGACGATCCCTAGCTGGTCTGAGAGGATGACCAGCCACACTGGAACTGAGACACGGTCCAG "Bacteria" "Proteobacteria" "Gammaproteobacteria" "Enterobacteriales" "Enterobacteriacea…
GATGAACGCTGGCGGCGTGCCTAACACATGCAAGTCGAACGGACAGATATGGAAACCTAGTGAAATATCTGTTAGTGGCGGACGGGTGAGTAACGCGTGGATAACCTGCCATATACAGGGGGATAACACTTAGAAATAGGTGCTAATACCGCATAAGCGCACAGCTTCGCATGAAGGAGTGTGAAAAACTAAGGTGGTATATGATGGATCCGCGTCTGATTAGCCAGTTGGTGAGGTAACGGCTCACCAAAGCGACGATCAGTAGCCGGCCTGAGAGGGCGGACGGCCACATTGGGACTGAGACACGGCCCAG "Bacteria" "Firmicutes" "Clostridia" "Clostridiales" "Lachnospiraceae" "Lachnospirace…
GATGAACGCTGGCGGCGTGCATAACACATTCAAGTCGAACGGAGTTGACCAGAAGCTTGCTTCAGGTTAACTTAGTGGCGGACGGGTGAGTAACGCGTGAGCAACCTGCCTGTTAGAGGGGAATAACGTCTGGAAACGGACGCTAATACCGCATAACGCATTGATATCGCATGGTGTTAATGCCAAAGATTTATCGCTAACAGATGGGCTCGCGTCCGATTAGGTAGTTGGTGGGGTAACGGCTCACCAAGCCGACGATCGGTAGCCGGACTGAGAGGTTGAACGGCCACATTGGAACTGAGAAACGGTCCAG "Bacteria" "Firmicutes" "Clostridia" "Clostridiales" "Ruminococcaceae" "Ruminococcace…
GATGAACGCTGGCGGCGTGCCTAACACATGCAAGTCGAACGGAGTTTTAAGACGGAAGTTTTCGGATGGAAGACTTAAAACTTAGTGGCGGACGGGTGAGTAACGCGTGGGTAACCTGCCTCATACAGGGGGATAACAGTTAGAAATGACTGCTAAAACCGCATAACATGGCGATACCGCATGATATTGCCATCAAATATTTATAGGTATGAGATGGGCCCGCGTCTGATTAGCCAGTTGGCAGGGTAATGGCCTACCAAAGCGACGATCAGTAGCCGGCTTGAGAGAGTGACCGGCCACATTGGGACTGAGACACGGCCCAA "Bacteria" "Firmicutes" "Clostridia" "Clostridiales" "Lachnospiraceae" "Lac…
GATGAACGCTGGCGGCGTGCTTAACACATGCAAGTCGAACGGGGATGCATTAAGAAGGAGTGCTTGCATTCCGGAAGGATGTATCTTAGTGGCGGACGGGTGAGTAACGCGTGGGTAACCTGCCCTATACCGGGGGATACCACCTGGAAACAGGTGCTAATACCGCATAAGCGCACGGGAGCGCATGCTCCTGTGTGAAAAACTCCGGTGGTATGGGATGGACCCGCGTCTGATTAGCCAGTTGGCAGGGTAACGGCCTACCAAAGCGACGATCAGTAGCCGGCCTGAGAGGGTGGACGGCCACATTGGGACTGAGACACGGCCCAA "Bacteria" "Firmicutes" "Clostridia" "Clostridiales" "Lachnospiraceae" …
GATGAACGCTGGCGGCGTGCCTAACACATGCAAGTCGAACGGGCGCGGCGTGCGGCAGGGGCCTCGGCCCCTGCGGCGTCGCGCGAGTGGCGGACGGGTGAGTAACGCGTGGGCAACCTGCCCTGTACTGGGGGATAACACCTGGAAACAGGTGCTAATACCGCATAAGCGCGCTGTGCCGCATGGCGCGGCGCGGAAAACCCCGGTGGTACAGGATGGGCCCGCGTCTGATTAGCTGGTTGGCAGGGTAACGGCCTACCAAGGCGACGATCAGTAGCCGGCCTGAGAGGGTGGACGGCCACACTGGGACTGAGACACGGCCCAG "Bacteria" "Firmicutes" "Clostridia" "Clostridiales" "Lachnospiraceae" NA…
GATAAACGCTGGCGGCGCACATAAGACATGCAAGTCGAACGAACTTAACTCATTCTTTTAGATTGAGAGCGGTTAGTGGCGGACTGGTGAGTAACACGTAAGCAACCTGCCTATCAGAGGGGAATAACAGTGAGAAATCATTGCTAATACCGCATAAGCTAGTAGTATCACATGATACAGCTAGAAAAGGAGTAATCCGCTGATAGATGGGCTTGCGTCTGATTAGCTAGTTGGTGGGGTAACGGCCTACCAAGGCGACGATCAGTAGCCGAACTGAGAGGTTGAACGGCCACATTGGGACTGAGATACGGCCCAG "Bacteria" "Firmicutes" "Clostridia" "Clostridiales" "Ruminococcaceae" "Ruminococc…
GACGAACGCTGGCGGCGTGCTTAACACATGCAAGTCGAACGGAGCACCCCTGAAAGAGTTTTCGGACAATGGAAGGGAATGCTTAGTGGCGGACTGGTGAGTAACGCGTGAGGAACCTGCCTTCCAGAGGGGGACAACAGTTGGAAACGACTGCTAATACCGCATGACACATGGCCGTGGCATCACGGACATGTCAAAGATTTATCGCTGGAAGATGGCCTCGCGTCTGATTAGCTAGTAGGCGGGGTAACGGCCCACCTAGGCGACGATCAGTAGCCGGACTGAGAGGTTGACCGGCCACATTGGGACTGAGATACGGCCCAG "Bacteria" "Firmicutes" "Clostridia" "Clostridiales" "Ruminococcaceae" "Os…
GATGAACGCTAGCTACAGGCTTAACACATGCAAGTCGAGGGGCAGCATGGGAGTTTGCTTGCAAACTTCCGATGGCGACCGGCGCACGGGTGAGTAACACGTATCCAACCTGCCGATAACTCGGGGATAGCCTTTCGAAAGAAAGATTAATATCCGATAGGATATCAAGATCGCATGATCTTGATATTAAAGAATTTCGGTTATCGATGGGGATGCGTTCCATTAGTTAGTTGGCGGGGTAACGGCCCACCAAGACGACGATGGATAGGGGTTCTGAGAGGAAGGTCCCCCACATTGGAACTGAGACACGGTCCAA "Bacteria" "Bacteroidetes" "Bacteroidia" "Bacteroidales" "Bacteroidaceae" "Bactero…
GACGAACGCTGGCGGCGTGCCTAACACATGCAAGTCGAACGAGAATCTATGGAAAGAGGCTTCGGCCAATTGAAGTAGAGGACAGTGGCGGACGGGTGAGTAACGCGTGAGCAACCTGCCTCGGAGTGGGGGACAACAGGGGGAAACCTCTGCTAATACCGCATAATGTCATTGGGTGGCATCACTTAATGACCAAAGATTTATTGCTCTGAGATGGGCTCGCGTCTGATTAGGTAGTTGGTGAGGTAATGGCTCACCAAGCCTACGATCAGTAGCCGGGTTGAGAGACTGAACGGCCACATTGGGACTGAGATACGGCCCAG "Bacteria" "Firmicutes" "Clostridia" "Clostridiales" "Ruminococcaceae" "Rum…
GACGAACGCTGGCGGCGTGCTTAACACATGCAAGTCGAACGGAGCACCCCTGAAGGAGTTTTCGGACAACGGAAGGGAATGCTTAGTGGCGGACTGGTGAGTAACGCGTGAGGAACCTGCCTTTCGGAGGGGGACAACAGTTGGAAACGACTGCTAATACCGCATGATACATTTGGGCCGCATGGTCTGAATGTCAAAGATTTATCGCCGAAAGATGGCCTCGCGTCTGATTAGCTAGTTGGTGGGGTAACGGCCCACCAAGGCGACGATCAGTAGCCGGACTGAGAGGTTGGCCGGCCACATTGGGACTGAGATACGGCCCAG "Bacteria" "Firmicutes" "Clostridia" "Clostridiales" "Ruminococcaceae" "Os…
GATGAACGCTGGCGGCGTGCCTAACACATGCAAGTCGAACGGAGTTACGATGAAACCTAGTGATTCGTAACTTAGTGGCGGACGGGTGAGTAACGCGTGGATAACCTGCCTTGCACTGGGGGATAACACTTAGAAATAGGTGCTAATACCGCATAAGCGCACAGAGCCGCATGGCTCAGTGTGAAAAACTCCGGTGGTGTAAGATGGATCCGCGTCTGATTAGCTGGTTGGCGGGGTAGAAGCCCACCAAGGCGACGATCAGTAGCCGGCCTGAGAGGGTGAACGGCCACATTGGGACTGAGACACGGCCCAA "Bacteria" "Firmicutes" "Clostridia" "Clostridiales" "Lachnospiraceae" "Lachnospirace…
GATGAACGCTGGCGGCGTGCCTAACACATGCAAGTCGAACGGAGTTACGATGAAACCTAGTGATTCGTAACTTAGTGGCGGACGGGTGAGTAACGCGTGGATAACCTGCCTTACACTGGGGGATAACACTTAGAAATAGGTGCTAATACCGCATAAGCGCACAGAGCCGCATGGCTCAGTGTGAAAAACTCCGGTGGTGTAAGATGGATCCGCGTCTGATTAGCTGGTTGGCGGGGTAGAAGCCCACCAAGGCGACGATCAGTAGCCGGCCTGAGAGGGTGAACGGCCACATTGGGACTGAGACACGGCCCAA "Bacteria" "Firmicutes" "Clostridia" "Clostridiales" "Lachnospiraceae" "Lachnospirace…
ATTGAACGCTGGCGGCATGCCTTACACATGCAAGTCGAACGGTAACAGGTTAAGCTGACGAGTGGCGAACGGGTGAGTAATGTATCGGAACGTGCCCAGTCGTGGGGGATAACTGCTCGAAAGAGCAGCTAATACCGCATACGACCTGAGGGTGAAAGCGGGGGATCGCAAGACCTCGCGCGATTGGAGCGGCCGATATCAGATTAGGTAGTTGGTGAGGTAAAGGCTCACCAAGCCGACGATCTGTAGCTGGTCTGAGAGGACGACCAGCCACACTGGGACTGAGACACGGCCCAG "Bacteria" "Proteobacteria" "Gammaproteobacteria" "Betaproteobacteriales" "Burkholderiaceae" "Pelomon…
GATGAACGCTGGCGGCGTGCCTAACACATGCAAGTCGAACGGGCGCGGCGTGCGGCAGGGGCCTCGGCCCCTGCGGCGCCGCGCGAGTGGCGGACGGGTGAGTAACGCGTGGGCAACCTGCCCTGTACTGGGGGATAACACCTGGAAACAGGTGCTAATACCGCATAAGCGCGCAGTGCCGCATGGCACGGCGCGGAAAACCCCGGTGGTACAGGATGGGCCCGCGTCTGATTAGCTGGTTGGCAGGGTAACGGCCTACCAAGGCGACGATCAGTAGCCGGCCTGAGAGGGTGGACGGCCACACTGGGACTGAGACACGGCCCAG "Bacteria" "Firmicutes" "Clostridia" "Clostridiales" "Lachnospiraceae" NA…
GACGAACGCTGGCGGCGTGCCTAACACATGCAAGTCGAACGGAGCTATGCGCTGAACGGAGAGCAGCTTGCTGAAGGAAGTTCTTGTATAGCTTAGTGGCGGACGGGTGAGTAACGCGTGAGCAACCTGCCTTTCAGAGGGGGATAACGTTTGGAAACGAACGCTAATACCGCATAAGACCACACTTCCACATGGGAGAGGGGTCAAAGGAGCAATCCGCTGAAAGATGGGCTCGCGTCCGATTAGATAGTTGGGGGGGTAACGGCCCACCAAGTCGACGATCGGTAGCCGGACTGAGAGGTTGAACGGCCACATTGGGACTGAGACACGGCCCAG "Bacteria" "Firmicutes" "Clostridia" "Clostridiales" "Ruminoco…
GATAAACGCTGGCGGCGCACATAAGACATGCAAGTCGAACGAACTTAATTCGAATGTTTACATTTGGAAGCGGTTAGTGGCGGACTGGTGAGTAACACGTAAGCAACCTGCCTATTAGAGGGGAATAACAGTGAGAAATCATTGCTAATACCGCATATGCTGTGAGTAACGCATGTTACAAACAGGAAAGGAGCAATCCGCTGATAGATGGGCTTGCGTCTGATTAGATAGTTGGTGGGGTAAAGGCTTACCAAGTCGACGATCAGTAGCCGGACTGAGAGGTTGAACGGCCACATTGGGACTGAGATACGGCCCAG "Bacteria" "Firmicutes" "Clostridia" "Clostridiales" "Ruminococcaceae" "Ruminococ…
GATGAACGCTGGCGGCGTGCTTAACACATGCAAGTCGAACGGGGCACCCCTGAAGGAGTTTTCGGACAACTGAAGGGAATGCTTAGTGGCGGACGGGTGAGTAACGCGTGAGTAACCTGCCTTGGAGTGGGGAATAACAGTTGGAAACAGCTGCTAATACCGCATGATGCAGTTGAGTCGCATGGCTCTGACTGCCAAAGATTTATCGCTCTGAGATGGACTCGCGTCTGATTAGCTAGTTGGCGGGGTAACGGCCCACCAAGGCGACGATCAGTAGCCGGACTGAGAGGTTGGCCGGCCACATTGGGACTGAGACACGGCCCAG "Bacteria" "Firmicutes" "Clostridia" "Clostridiales" "Ruminococcaceae" "R…
GACGAACGCTGGCGGTGTGCCTCATACATGCAAGTCGAACGAGAAGCAGGAGCTTGCTCCTGTGGAAAGTGGCGGACGGGTGAGTACAACATAGGAAATCTGCCTTAGGGTGGGGGACAACAGAGGGAAACTTCTGCTAATACCCCATATGAGCTTGGTTGAAATACCAATCTTGAAAGTTCCGGCGCCCTAAGATGAGCCTGTGCCTGATTAGCTAGTTGGTGGTGTAATGGACTACCAAGGCAACGATCAGTAGCTGGTTTGAGAGGATGATCAGCCACAATGGGACTGAGACACGGCCCAT "Bacteria" "Cyanobacteria" "Melainabacteria" "Gastranaerophilales" NA NA NA
GATGAACGCTGGCGGCGTGCCTAACACATGCAAGTCGAACGGAGTTACGATGAAACCTAGTGATTCGTAACTTAGTGGCGGACGGGTGAGTAACGCGTGGATAACCTGCCTTGCACTGGGGGATAACACTTAGAAATAGGTGCTAATACCGCATAAGCGCACGGAGCCGCATGGCTCAGTGTGAAAAACTCCGGTGGTGTAAGATGGATCCGCGTCTGATTAGCTGGTTGGCGGGGTAGAAGCCCACCAAGGCGACGATCAGTAGCCGGCCTGAGAGGGTGAACGGCCACATTGGGACTGAGACACGGCCCAA "Bacteria" "Firmicutes" "Clostridia" "Clostridiales" "Lachnospiraceae" "Lachnospirace…
GATGAACGCTGGCGGCGTGCCTAACACATGCAAGTCGAACGGGGGCGCCGAGGCGGCAGGATTTCGGTCCGCGCCGCGCGGCGCCCCAGTGGCGGACGGGTGAGTAACGCGTGGGCAACCTGCCTCGCACTGGGGGATAACACTTAGAAATAGGTGCTAACACCGCATAGCGGGCGGGGGCGCATGCCCCTGCCCTGAAAACCCAGGTGGTGCGAGATGGGCCCGCGTCTGATTAGCTTGTTGGCAGGGTAACGGCCTACCAAGGCGACGATCAGTAGCCGGCCTGAGAGGGTGGACGGCCACATTGGGACTGAGACACGGCCCAG "Bacteria" "Firmicutes" "Clostridia" "Clostridiales" "Lachnospiraceae" N…
GATGAACGCTGGCGGCGTGCTTAACACATGCAAGTCGAACGGACTCATATTGAAACCTAGTGATGTATGAGTTAGTGGCGGACGGGTGAGTAACGCGTGGAGAACCTGCCGTATACTGGGGGATAACACTTAGAAATAGGTGCTAATACCGCATAAGCGCACAGCTTCGCATGAAGCAGTGTGGAAAACAAAAAGCTAAAGCTTTTGGTGGTATACGATGGATCCGCGTCTGATTAGCTTGTTGGCGGGGTAAAGGCCCACCAAGGCGACGATCAGTAGCCGGCCTGAGAGGGTGAACGGCCACATTGGGACTGAGACACGGCCCAA "Bacteria" "Firmicutes" "Clostridia" "Clostridiales" "Lachnospiraceae" …
GATGAACGCTAGCGACAGGCTTAACACATGCAAGTCGAGGGGCAGCGGTGGTGAAGGCTTGCCTTTACCAGCCGGCGACCGGCGCACGGGTGAGTAACACGTATGCAACCTGCCTGCCACAGCCGGATAATCGGGAGAAATTCCGTCTAATACGGCATAATGCATCGACGGGACATCCTGTTGGTGCCAAAGGTTGATTCCGGTGGCGGATGGGCATGCGTCGCATTAGTTAGTTGGCGGTGTAACGGACCACCAAGACGACGATGCGTAGGGGTTCTGAGAGGAAGGTCCCCCACACTGGTACTGAGACACGGACCAG "Bacteria" "Bacteroidetes" "Bacteroidia" "Bacteroidales" "Muribaculaceae" NA NA
GATGAACGCTGGCGGCGTGCCTAACACATGCAAGTCGAACGGGGACAGACGGAAACCTAGTGAAGTCTGTCCGAGTGGCGGACGGGTGAGTAACGCGTGGATAACCTGCCGCATGCAGGGGGATACCGGCTGGAAACAGCCGCTAATACCGCATAAGCGCACGGTGCCGCATGGCAGAGTGCGAAAAGGAGAAATCCGGCAAGCGATGGATCCGCGTCCGATTAGCCAGTTGGCGGGGTAAGGGCCCACCAAAGCGACGATCGGTAGCCGGCCTGAGAGGGCGGACGGCCACATTGGGACTGAGACACGGCCCAG "Bacteria" "Firmicutes" "Clostridia" "Clostridiales" "Lachnospiraceae" "Lachnospira…
GACGAACGCTGGCGGCGTGCCTAATACATGCAAGTCGGACGCTTCTTTCCTCCCGAGTGCTTGCACTCAATTGGAAAGAGGAGTGGCGGACGGGTGAGTAACACGTGGGTAACCTACCCATCAGAGGGGGATAACACTTGGAAACAGGTGCTAATACCGCATAACAGTTTATGCCGCATGGCATAAGAGTGAAAGGCGCTTTCGGGTGTCGCTGATGGATGGACCCGCGGTGCATTAGCTAGTTGGTGAGGTAACGGCTCACCAAGGCCACGATGCATAGCCGACCTGAGAGGGTGATCGGCCACACTGGGACTGAGACACGGCCCAG "Bacteria" "Firmicutes" "Bacilli" "Lactobacillales" "Enterococcaceae" …
GATGAACGCTGGCGGCGTGCTTAACACATGCAAGTCGAACGAGAATCCAGTGAAGGAGTTTTCGGACAACGGATCTGGAGGAAAGTGGCGGACGGGTGAGTAACGCGTGAGCAATCTGCCTTGGAGTGGGGAATAACGGTTGGAAACAGCCGCTAATACCGCATGATGCGTCTGGGAGGCATCTCTCTGGACGCCAAAGATTTATCGCTCTGAGATGAGCTCGCGTCTGATTAGCTTGTTGGCGGGGTAAAGGCCCACCAAGGCGACGATCAGTAGCCGGACTGAGAGGTTGGCCGGCCACATTGGGACTGAGACACGGCCCAG "Bacteria" "Firmicutes" "Clostridia" "Clostridiales" "Ruminococcaceae" NA …
GATGAACGCTGGCGGCGTGCTTAACACATGCAAGTCGAACGGAGTACCCCTGAAGGAGTTTTCGGACAACTGAAGGGACTACTTAGTGGCGGACGGGTGAGTAACGCGTGAGTAACCTGCCTTGGAGTGGGGAATAACAGATGGAAACATCTGCTAATACCGCATAATACGTCTGTGTCGCATGGCACTGGACGTCAAAGATTTATCGCTCTGAGATGGACTCGCGTCTGATTAGCTGGTTGGCGGGGTAACGGCCCACCAAGGCGACGATCAGTAGCCGGACTGAGAGGTTGGCCGGCCACATTGGGACTGAGACACGGCCCAG "Bacteria" "Firmicutes" "Clostridia" "Clostridiales" "Ruminococcaceae" "R…
GATGAACGCTGGCGGCGTGCCTAACACATGCAAGTCGAACGGGCGCGGCGTGCAGCAGGGGCCTCGGCCCCTGCGGCGCCGCGCGAGTGGCGGACGGGTGAGTAACGCGTGGGCAACCTGCCCTGTACTGGGGGATAACACCTGGAAACAGGTGCTAATACCGCATAAGCGCGCAGTGCCGCATGGCACGGCGCGGAAAACCCCGGTGGTACAGGATGGGCCCGCGTCTGATTAGCTGGTTGGCAGGGTAACGGCCTACCAAGGCGACGATCAGTAGCCGGCCTGAGAGGGTGGACGGCCACACTGGGACTGAGACACGGCCCAG "Bacteria" "Firmicutes" "Clostridia" "Clostridiales" "Lachnospiraceae" NA…
GATGAACGCTGGCGGCGTGCTTAACACATGCAAGTCGAATGTAGCAATACATGGCGGACGGGTGAGTAACGCGTGAGCAATCTGCCCATGTCTGGGGAATAACAGTTGGAAACGACTGATAATACCGCATAAGGCCACAGGAAGGCATCTTCCAGGGGTAAAAGATTTATCGGATATGGATGAGCTCGCGTCTGATTAGCTTGTTGGTGAGGTAACGGCCCACCAAGGCGACGATCAGTAGCCGACCTGAGAGGGTGATCGGCCACATTGGAACTGAGACACGGTCCAA "Bacteria" "Firmicutes" "Clostridia" "Clostridiales" "Clostridiales_vadinBB60_group" NA NA
GATGAACGCTGGCGGCGTGCCTAACACATGCAAGTCGAGCGAAGCGATTTTGAGGAAGTTTTCGGATGGAATCGAAATTGACTTAGCGGCGGACGGGTGAGTAACACGTGGGTAATCTGCCTTATACAGGGGGATAACAGTTAGAAATGACTGCTAATACCGCATAAGCGCACGGGGACGCATGTTTCTGTGTGAAAAACTCCGGTAGTATAAGATGAGCCCGCGTCTGATTAGCTGGTTGGTGGGGTAACGGCCTACCAAGGCGACGATCAGTAGCCGGCCTGAGAGGGTGAACGGCCACATTGGGACTGAGACACGGCCCAA "Bacteria" "Firmicutes" "Clostridia" "Clostridiales" "Lachnospiraceae" NA …
GACGAACGCTGGCGGCGTGCTTAACACATGCAAGTCGAACGGAGTTCCTTGGAAAGAGATTTCGGTCAATGGAAGAGGACACTTAGTGGCGGACGGGTGAGTAACGCGTGAGGAACCTGCCTCTCAGAGGGGGACAACAGTTGGAAACGACTGCTAATACCGCATAACATATCTGTATCGCATGGTATGGATATCAAAGATTTATCGCTGAGAGATGGCCTCGCGTCTGATTAGCTAGTTGGTAGGGTAACGGCCTACCAAGGCGACGATCAGTAGCCGGACTGAGAGGTTGGCCGGCCACATTGGGACTGAGATACGGCCCAG "Bacteria" "Firmicutes" "Clostridia" "Clostridiales" "Ruminococcaceae" "Ru…
GACGAACGCTGGCGGCACGCCTAACACATGCAAGTCGAACGGAGTTTTAGATGCTTGCATCTGAAACTTAGTGGCGGACGGGTGAGTAACACGTGAGCAACCTGCCTTCCAGAGGGGGATAACGTTTGGAAACGAACGCTAATACCGCATAATATATATTTATCACATGGTAGATATATCAAAGGAGCAATCCGCTGGGAGATGGGCTCGCGTCCGATTAGATAGTTGGCGGGGTAACGGCCCACCAAGTCAACGATCGGTAGCCGGACTGAGAGGTTGAACGGCCACATTGGGACTGAGACACGGCCCAG "Bacteria" "Firmicutes" "Clostridia" "Clostridiales" "Ruminococcaceae" NA NA
GATGAACGCTGGCGGCGTGCCTAACACATGCAAGTCGAGCGAAGCACTTTGTTAGAACTTTTCGGAGGGACGAGGAAGTGACTGAGCGGCGGACGGGTGAGTAACGCGTGGGCAACCTGCCTTACACAGGGGGATAACAGTTAGAAATGACTGCTAATACCGCATAAGACCACATTGCCGCATGGCAGGGTGGTAAAAACTCCGGTGGTGTAAGATGGGCCCGCGTCTGATTAGGTAGTTGGCAGGGTAGAGGCCTACCAAGCCTACGATCAGTAGCCGGCCTGAGAGGGTGGACGGCCACATTGGGACTGAGACACGGCCCAA "Bacteria" "Firmicutes" "Clostridia" "Clostridiales" "Lachnospiraceae" "La…
GATGAACGCTGGCGGCGTGCTTAACACATGCAAGTCGAACGGAGTGCCCTTGAAGGAGTTTTCGGACAACGGATAGGGTTACTTAGTGGCGGACGGGTGAGTAACGCGTGAGGAACCTGCCTTGGAGTGGGGAATAACAGCTGGAAACAGCTGCTAATACCGCATGATGCAGTTGGGCCGCATGGCTCTGACTGCCAAAGATTTATCGCTCTGAGATGGACTCGCGTCTGATTAGCTAGTTGGCGGGGTAACGGCCCACCAAGGCGACGATCAGTAGCCGGACTGAGAGGTTGGCCGGCCACATTGGGACTGAGACACGGCCCAG "Bacteria" "Firmicutes" "Clostridia" "Clostridiales" "Ruminococcaceae" "R…
GATGAACGCTGGCGGCATGCCTAAGACATGCAAGTCGAACGAAGTAGCCTTTTGAAAGTGGAGTGCTTGCACAAAACAAGATAAAGAATTCTACTTAGTGGCAGACGGGTGAGTAACACGTGGGTAATCTACCCTAGGGACTGGGATAACGTTTGGAAACGAACGCTAATACCAGATGATACATAATCAGATAACTGGATATGTTAAAAGGAGCGTTTGCTCCACCTTAGGATGAGCTTGCGGTGTATTAGCTAGTTGGTGGGGCAATGGCCTACCAAGGCAACGATGCATAGCCGAGCTGAGAGGCTGATCGGCCACATTGGAACTGAGATACGGTCCAA "Bacteria" "Tenericutes" "Mollicutes" "Mollicutes_RF39" N…
GATGAACGCTGGCGGCGTGCCTAACACATGCAAGTCGAACGGAGTTTTAAGACGGAAGTTTTCGGATGGAAGACTTAAAACTTAGTGGCGGACGGGTGAGTAACGCGTGGGTAACCTGCCTCATACAGGGGAATAACAGTTAGAAATGACTGCTAAAACCGCATAACATGGCGATACCGCATGATATTGCCATCAAATATTTATAGGTATGAGATGGGCCCGCGTCTGATTAGCCAGTTGGCAGGGTAATGGCCTACCAAAGCGACGATCAGTAGCCGGCTTGAGAGAGTGACCGGCCACATTGGGACTGAGACACGGCCCAA "Bacteria" "Firmicutes" "Clostridia" "Clostridiales" "Lachnospiraceae" "Lac…
GATAAACGCTGGCGGCGCACATAAGACATGCAAGTCGAACGGACTTAACTCATTCTTTTAGATTGAGAGCGGTTAGTGGCGGACTGGTGAGTAACACGTAAGCAACCTGCCTATCAGAGGGGAATAACAGTGAGAAATCATTGCTAATACCGCATATGCTCACAGTATCACATGATACAGTGAGGAAAGGAGCAATCCGCTGATAGATGGGCTTACGCCTGATTAGTTAGTTGGTGGGGTAACGGCCTACCAAGACGACGATCAGTAGCCGGACTGAGAGGTTGAACGGCCACATTGGGACTGAGATACGGCCCAG "Bacteria" "Firmicutes" "Clostridia" "Clostridiales" "Ruminococcaceae" "Ruminococc…
ATTGAACGCTGGCGGCAGGCTTAACACATGCAAGTCGAACGATGAAACTCTAGCTTGCTAGAGATGATTAGTGGCGGACGGGTGAGTAACATTTAGGAATCTGCCTAGTAGTGGGGGATAGCTCGGGGAAACTCGAATTAATACCGCATACGACCTACGGGTGAAAGGGGGCGCAAGCTCTTGCTATTAGATGAGCCTAAATCAGATTAGCTAGTTGGTGGGGTAAAGGCCCACCAAGGCGACGATCTGTAACTGGTCTGAGAGGATGATCAGTCACACCGGAACTGAGACACGGTCCGG "Bacteria" "Proteobacteria" "Gammaproteobacteria" "Pseudomonadales" "Moraxellaceae" "Enhydrobacter…
GATGAACGCTGGCGGCGTGCTTAACACATGCAAGTCGAACGGGGGATGTACAGCGGGAAGATTTCGGTCGGACCAAGTGCATGCCTAGTGGCGGACGGGTGAGTAACGCGTGGGTAACCTGCCTTACACAGGGGGATAACACTTAGAAATAGGTGCTAATACCGCATGAGCGCACAGGACCGCATGGTCGAGTGTGAAAAACTGAGGTGGTGTAAGATGGACCCGCGTCTGATTAGCTAGTTGGTGAGGTAACGGCCCACCAAGGCGACGATCAGTAGCCGGCCTGAGAGGGTGGACGGCCACATTGGGACTGAGACACGGCCCAA "Bacteria" "Firmicutes" "Clostridia" "Clostridiales" "Lachnospiraceae" "…
GATGAACGCTAGCGACAGGCTTAACACATGCAAGTCGAGGGGCAGCGGGGAGGTAGCAATACTTCCGCCGGCGACCGGCGCACGGGTGAGTAACACGTATGGAACCTGCCCGTAGCAGGGGGATAAGCGGAAGAAATTCCGTCTAATACCGCGTAATAACTCCGAGGGGCATCTCTTGGGGTTTAAAGGGTAACACCGGCTACGGATGGCCATGCGGCGCATTAGCTAGTTGGCGGGGTAACGGCCCACCAAGGCGACGATGCGTAGGGGTTCTGAGAGGAAGGTCCCCCACACTGGTACTGAGACACGGACCAG "Bacteria" "Bacteroidetes" "Bacteroidia" "Bacteroidales" "Muribaculaceae" NA NA
GATAAACGCTGGCGGCGCACATAAGACATGCAAGTCGAACGAACTTAATACCTTGCTTGCAAGGTAAGCGGTTAGTGGCGGACTGGTGAGTAACACGTAAGAAATCTGCCTATCAGAGGGGAATAACAGTGAGAAATCACTGCTAATACCGCATATGCCATAGTCATCGCATGATGATAGTGGGAAAGAAGCAATTCGCTGATAGATGAGCTTGCGGCTGATTAGCTAGTTGGTGGGGTAACGGCCTACCAAGGCGACGATCAGTAGCCGGACTGAGAGGTTGAACGGCCACATTGGGACTGAGATACGGCCCAG "Bacteria" "Firmicutes" "Clostridia" "Clostridiales" "Ruminococcaceae" "Ruminococca…
GATGAACGCTAGCGACAGGCTTAACACATGCAAGTCGAGGGGCAGCGGGGAGCAAGCTTGCTTGCTCTGCCGGCGACCGGCGCACGGGTGAGTAACACGTATGCAACCTGCCCTCCGCAGGGGGATAACCCGGAGAAATCCGGACTAATACCGCGTGGTACATCTGTGGGGCATCCCACGGGTGTTAAAAGGAAGCGATTCCGGCGGAGGATGGGCATGCGGCGCATTAGCTTGTTGGCGGGGTAACGGCCCACCAAGGCGACGATGCGTAGGGGTTCTGAGAGGAAGGTCCCCCACACTGGTACTGAGACACGGACCAG "Bacteria" "Bacteroidetes" "Bacteroidia" "Bacteroidales" "Muribaculaceae" NA NA
GATGAACGCTAGCGGCAGGCCTAACACATGCAAGTCGAGGGGCAGCGGGGATGTAGCAATACATCTGCCGGCGACCGGCGCACGGGTGCGTAACGCGTATGCAACCTACCCATAACAGGGGGATAACACCGAGAAATTGGTACTAATACCCCATAATATTTGATAAGGCATCTTATTGAGTTGAAAACTCTGGTGGTTATGGATGGGCATGCGTTGTATTAGTTAGTTGGTGAGGTAACGGCTCACCAAGACGACGATACATAGGGGGACTGAGAGGTTAACCCCCCACATTGGTACTGAGACACGGACCAA "Bacteria" "Bacteroidetes" "Bacteroidia" "Bacteroidales" "Rikenellaceae" "Alistipes" NA
GATGAACGCTGGCGGCGTGCCTAACACATGCAAGTCGAACGGAGTTACGATGAAACCTAGTGATTCGTAACTTAGTGGCGGACGGGTGAGTAACGCGTGGATAACCTGCCTTGCACTGGGGGATAACACTTAGAAATAGGTGCTAATACCGCATAAGCGCACAGAGCCGCATGGCTCAGTGTGAAAAACTTCGGTGGTGTAAGATGGATCCGCGTCTGATTAGCTGGTTGGCGGGGTAGAAGCCCACCAAGGCGACGATCAGTAGCCGGCCTGAGAGGGTGAACGGCCACATTGGGACTGAGACACGGCCCAA "Bacteria" "Firmicutes" "Clostridia" "Clostridiales" "Lachnospiraceae" "Lachnospirace…
GATGAACGCTGGCGGCGTGCCTAACACATGCAAGTCGAACGGGGGCCAGCGGCGGAAGGGGATGGTTTACCAGACCCGGAAGGCGCGGGCCTTAGTGGCGGACGGGTGAGTAACGCGTGGGGAACCTGCCCCGTACCGGGGGATAACACCTGGAAACAGGTGCTAATACCGCATAACAGAAGGGGACGCATGTTTCTTTCTTGAAAACTCCGGTGGTACGGGATGGACCCGCGTCTGATTAGCTGGTTGGCGGGGTAACGGCCCACCAAGGCGACGATCAGTAGCCGGCCTGAGAGGGCGGACGGCCACATTGGGACTGAGACACGGCCCAA "Bacteria" "Firmicutes" "Clostridia" "Clostridiales" "Lachnospirac…
GATGAACGCTGGCGGCGTGCTTAACACATGCAAGTCGAACGAAGCACTTGAGATTGAATCTTCGGATGAGAACTCTTGTGACTGAGTGGCGGACGGGTGAGTAACGCGTGGGTAACCTACCTCATACAGGGGGATAACAGTTGGAAACGACCGCTAATACCGCATAACCCGCTAGTATCGCATGATACGGACGGAAAAGATTTATCGGTATGAGATGGACCCGCGTCTGATTAGCCAGTTGGCAGGGTAACGGCCTACCAAAGCGACGATCAGTAGCCGGCCTGAGAGGGTGAACGGCCACATTGGGACTGAGACACGGCCCAA "Bacteria" "Firmicutes" "Clostridia" "Clostridiales" "Lachnospiraceae" NA …
GATGAACGCTGGCGGCATGCCTAAGACATGCAAGTCGAACGAGGTGGCCCATTGAAATCTGCGTGCTTGCACAAAGATGGATTTGGATTTTCCACCTAGTGGCAAACGGGTGAGTAACACGTGGGTTACCTACCTCTAAGTTGGGGATAACAACTGGAAACGGTTGATAATACCGAATGTGCTCTATGGAGTAAAGAAGCCTTTAAAGCTTCGCTTAGAGATGGGCCTGCGGCGTATTAGTTAGTTGGTGGGGTAACGGCCTACCAAGACGACGATGCGTAGCCGAACTGAGAGGTTAATCGGCCACACTGGGACTGAGACACGGCCCAG "Bacteria" "Tenericutes" "Mollicutes" "Mollicutes_RF39" NA NA NA
GATGAACGCTGGCGGCGTGCCTAACACATGCAAGTCGAACGGGAACGGCCCACGGGCGAGATTTCGGTCAAGCCCCGGACTGTTTTAGTGGCGGACGGGTGAGTAACGCGTGGGCAACCTGCCCCGTACCGGGGGATAACACCTGGAAACAGGTGCTAATACCGCATAATAAGAGGTCCTGCATGGGACCTCCTTGAAAACTCCGGTGGTACGGGATGGACCCGCGTCTGATTAGCTGGTTGGCGGGGTAACGGCCCACCAAGGCGACGATCGGTAGCCGGCCTGAGAGGGTGGACGGCCACATTGGGACTGAGACACGGCCCAG "Bacteria" "Firmicutes" "Clostridia" "Clostridiales" "Lachnospiraceae" NA…
GACGAACGCTGGCGGCATGCCTAACACATGCAAGTCGAACGGGGATAGCAATATCCTAGTGGCGAACGGGTGAGTAACGCGTGAGTAACCTGCCTCATACAACGGGATACCTGAGGGAAACTTCAGTTAATACGGTATAAGACCACACTGCCGCATGGCAGAGGGGTAAAAGGAGCAATCCGGTATGAGATGGACTCGCGTCGCATTAGCTAGTTGGTGAGGTAACGGCCCACCAAGGCGACGATGCGTAGCCGACCTGAGAGGGTGATCGGCCACATTGGGACTGAGATACGGCCCAG "Bacteria" "Firmicutes" "Clostridia" "Clostridiales" "Clostridiales_vadinBB60_group" NA NA
GATGAACGCTGGCGGCGTGCTTAACACATGCAAGTCGAACGAAGCAGAAGGATGCTTGCATCCTTTTGACTGAGTGGCGGACGGGTGAGTAACACGTAGAGAACCTACCTTACACAGGGGGACAACGGCTGGAAACGGCTGCTAATACCGCATAAGCACCCAGTTTCGCATGAAACAGAGTGAAAAGAGTAAATCGGTGTAAGATGGCTCTGCGTCTGATTAGCTAGTTGGTGGGGTAAAGGCTCACCAAGGCGACGATCAGTAGCCGGCCTGAGAGGGCGACCGGCCACATTGGGACTGAGACACGGCCCAG "Bacteria" "Firmicutes" "Clostridia" "Clostridiales" "Lachnospiraceae" NA NA
GACGAACGCTGGCGGCACGCCTAACACATGCAAGTCGAACGGGGTATTGGATGCTTGCATCAAATACCTAGTGGCGGACGGGTGAGTAACACGTGAGCAACCTGCCTCTCAGAGGGGGATAACGTTTGGAAACGAACGCTAATACCGCATGAAATATTGGTATCGCATGGTGCTGATATCAAAGGAGCAATCCGCTGAGAGATGGGCTCGCGTCCGATTAGATAGTTGGCGGGGTAACGGCCCACCAAGTCGGCGATCGGTAGCCGGACTGAGAGGTTGAACGGCCACATTGGGACTGAGACACGGCCCAG "Bacteria" "Firmicutes" "Clostridia" "Clostridiales" "Ruminococcaceae" NA NA
GACGAACGCTGGCGGCGTGCTTAACACATGCAAGTCGAACGGAGCACCCCTGAAGGAGTTTTCGGACAACGGATGGGAATGCTTAGTGGCGGACTGGTGAGTAACGCGTGAGGAACCTGCCTTCCAGAGGGGGACAACAGTTGGAAACGACTGCTAATACCGCATGATACATTTGAATCGCATGGTTTGAATGTCAAAGATTTATCGCTGGAAGATGGCCTCGCGTCTGATTAGCTTGTTGGTGAGGTAACGGCCCACCAAGGCGACGATCAGTAGCCGGACTGAGAGGTTGGCCGGCCACATTGGGACTGAGATACGGCCCAG "Bacteria" "Firmicutes" "Clostridia" "Clostridiales" "Ruminococcaceae" "Os…
AACGAACGCTGGCGGCAGGCTTAACACATGCAAGTTGAACGGGATTTGTATGGTGCTTGCACCACATAATGAGAGTAGCGCACTGGTGAGTAACACGTGGGAACATACCTTGAAGTGGGGGACAACAGAGGGAAACTTCTGCTAATACCGCATAATCCCTGAGGGGGAAAGATTTATCGCTTTAAGATTGGCCCGCGGAAGATTAGGTAGTTGGTGGGGTAAAGGCCTACCAAGCCGACGATCTATAGCTGGTCTGAGAGGACGAACAGCCACATTGGAACTGAGACACGGTCCAG "Bacteria" "Proteobacteria" "Alphaproteobacteria" "Rhodospirillales" NA NA NA
GATGAACGCTGGCGGCACGCTTAACACATGCAAGTCGAGCGAGAGAGTTTTGCGGAAAGGCTTCGGCCTGGAAGGGAAATGATCTAGCGGCGGACGGGTGAGTAACACGTGGGTAACCTACCCTATACAGGGGGATAACGTATAGAAATGTACGCTAATACCGCATAAGCCTACAGGTTCGCATGAACTAGTAGGAAAAGCCGAGACGGTATAGGATGGGCCCGCGACTGATTAGCTAGTTGGGGAGGTAAAGGCTTACCAAGGCAACGATCAGTAGCCGGTCTGAGAGGATGGACGGCCACATTGGGACTGAGACACGGCCCAG "Bacteria" "Firmicutes" "Clostridia" "Clostridiales" "Defluviitaleaceae" …
GATGAACGCTGGCGGCGTGCTTAACACATGCAAGTCGAACGGATGCAAGGGGCTTGCTCCTTGCATTAGTGGCGGACGGGTGAGTAACGCGTGAGCAATCTGCCCATATCTGGGGGATAACAGTTAGAAATGACTGCTAATACCGCATATGACCACAGGGAGGCATCTCCCAGGGGTGAAAGATTTATCGGATATGGATGAGCTCGCGTCCCATTAGGTAGTTGGTGAGGTAACGGCCCACCAAGCCGACGATGGGTAGCCGGCCTTAGAGGGCGATCGGCCACATTGGAACTGAGATACGGTCCAA "Bacteria" "Firmicutes" "Clostridia" "Clostridiales" "Clostridiales_vadinBB60_group" NA NA
GATGAACGCTGGCGGCGTGCCTAACACATGCAAGTCGAGCGGGAAATTTCGGACAGAGACTTCGGTTGAAGGAAGAAATGGATAGCGGCGGACGGGTGAGTAACGCGTAGGCAACCTGCCCTTCACAGAGGGATAGCCACTGGAAACGGTGATTAATACCTCATAACGCAAGTCAATCACATGGTTGATTTGCCAAAGATTTATCGGTGAGGGATGGGCCTGCGTCTGATTAGTTAGTTGGTGGGGTAACGGCCTACCAAGGCAACGATCAGTAGCCGACCTGAGAGGGTAATCGGCCACATTGGAACTGAGACACGGTCCAA "Bacteria" "Firmicutes" "Clostridia" "Clostridiales" "Family_XIII" "Anaerov…
ATTGAACGCTGGCGGCAGGCCTAACACATGCAAGTCGAACGGTAACAGGAAACAGCTTGCTGTTTCGCTGACGAGTGGCGGACGGGTGAGTAATGTCTGGGAAACTGCCTGATGGAGGGGGATAACTACTGGAAACGGTAGCTAATACCGCATAACGTCGCAAGACCAAAGAGGGGGACCTTCGGGCCTCTTGCCATCGGATGTGCCCAGATGGGATTAGCTAGTAGGTGGGGTAACGGCTCACCTAGGCGACGATCCCTAGCTGGTCTGAGAGGATGACCAGCCACACTGGAACTGAGACACGGTCCAG "Bacteria" "Proteobacteria" "Gammaproteobacteria" "Enterobacteriales" "Enterobacteriacea…
GATGAACGCTGGCGGCATGCCTAACACATGCAAGTCGAACGGGGTTTATATAACAGAACTCTCCGGAGGGAAGATATATAAACCTAGTGGCGGACGGGTGAGTAACGCGTGGGCAACCTGCCCTGTACCGGGGGACAACAGCCAGAAATGGCTGCTAATACCGCATAAGCCTGCTGTGCCGCATGGCACAGCAGGGAAAACCACGGTGGTACAGGATGGGCCCGCGTCTGATTAGTTAGTTGGCAGGGTAACGGCCTACCAAGACAACGATCAGTAGCCGGCTTGAGAGAGTGGACGGCCACATTGGGACTGAGACACGGCCCAG "Bacteria" "Firmicutes" "Clostridia" "Clostridiales" "Lachnospiraceae" "L…
GATGAACGCTGGCGGCGTGCTTAACACATGCAAGTCGAACGAAGCGATCGGGAGGAAGTTTTCGGATGGAATCCGGATTGACTGAGTGGCGGACGGGTGAGTAACGCGTGGGTAACCTGCCTCATACAGGGGGATAACAGTTAGAAATGACTGCTAATACCGCATAAGCGCACAGGGACACATGTTCCGGTGTGAAAAACTCCGGTGGTATGAGATGGACCCGCGTCTGATTAGCTGGTTGGCGGGGTAACGGCCCACCAAGGCGACGATCAGTAGCCGACCTGAGAGGGTGACCGGCCACATTGGGACTGAGACACGGCCCAA "Bacteria" "Firmicutes" "Clostridia" "Clostridiales" "Lachnospiraceae" NA …
GATGAACGCTGGCGGCGTGCCTAACACATGCAAGTCGAACGGAGCTATTCAGGAAACTTCCTTCGGGGAGCGGAATCTTTAGCTTAGTGGCGGACGGGTGAGTAACGCGTGAGCAATCTGCCTTTGGATGGGGGATAACAGCCGGAAACGGCTGCTAATACCGCATAATGCAACGGGATCGCATGGTCCTGCTGCCAAAGATTTATTGTCCAAAGATGAGCTCGCGTCTGATTAGCCAGTTGGCGGGGTAACGGCCCACCAAAGCGACGATCAGTAGCCGGACTGAGAGGTTGAACGGCCACATTGGGACTGAGACACGGCCCAG "Bacteria" "Firmicutes" "Clostridia" "Clostridiales" "Ruminococcaceae" "B…
GATGAACGCTGGCGGCGTGCCTAACACATGCAAGTCGAACGGAGTCATTAAGGAAAACTCTTCGGAGTCGGAATTCTTGACTTAGTGGCGGACGGGTGAGTAACGCGTGAGCAATCTGCCTTTGGATGTGGGATAACAGCCGGAAACGGCTGCTAATACCGCATAACGCATTCTGGCCGCATGACCGGGATGCCAAAGATTTATCGTCCAAAGATGAGCTCGCGTCTGATTAGCTGGTTGGCGGGGTAACGGCCCACCAAGGCGACGATCAGTAGCCGGACTGAGAGGTTGAACGGCCACATTGGGACTGAGACACGGCCCAG "Bacteria" "Firmicutes" "Clostridia" "Clostridiales" "Ruminococcaceae" "But…
GATAAACGCTGGCGGCGCACATAAGACATGCAAGTCGAACGAACTTAACCATTTGTTTACATTTGGGGCGGTTAGTGGCGGACTGGTGAGTAACGCGTGAGCAACCTGGCTATTAGAGGGGAATAACAGTGAGAAATCATTGCTAATACCGCATATGCTCACAGTACCACATGGTACAGTGAGGAAAGGAGCAATCCGCTAATAGATGGGCTCGCGTCTGATTAGCTAGTTGGTGGGGTAAAGGCCTACCAAGGCGACGATCAGTAGCCGGACTGAGAGGTTGAACGGCCACATTGGGACTGAGATACGGCCCAG "Bacteria" "Firmicutes" "Clostridia" "Clostridiales" "Ruminococcaceae" "Ruminococca…
GATGAACGCTGGCGGCGTGCCTAACACATGCAAGTCGAACGGACTTATAACGAAACCTAGTGAATTATAAGTTAGTGGCGGACGGGTGAGTAACGCGTGGAAAACCTGCCGTATACTGGGGGATAACACTTAGAAATAGGTGCTAATACCGCATAAGCGCACAGCTTCGCATGAAGCAGTGCGAAAAACTCCGGTGGTATACGATGGTTCCGCGTCTGATTAGCTAGTTGGTGAGGTAAAAGCCCACCAAGGCAACGATCAGTAGCCGGCCTGAGAGGGTGAACGGCCACATTGGGACTGAGACACGGCCCAG "Bacteria" "Firmicutes" "Clostridia" "Clostridiales" "Lachnospiraceae" "Lachnospirace…
GACGAACGCTGGCGGCGTGCCTAATACATGCAAGTCGAGCGAGCTTGCCTAGATAATTTTAGTGCTTGCACTAAATGAAACTAGATACAAGCGAGCGGCGGACGGGTGAGTAACACGTGGGTAACCTGCCCAAGAGACTGGGATAACACCTGGAAACAGATGCTAATACCGGATAACAACACTAGACGCATGTCTAGAGTTTGAAAGATGGTTCTGCTATCACTCTTGGATGGACCTGCGGTGCATTAGCTAGTTGGTAAGGTAACGGCTTACCAAGGCAATGATGCATAGCCGAGTTGAGAGACTGATCGGCCACATTGGGACTGAGACACGGCCCAA "Bacteria" "Firmicutes" "Bacilli" "Lactobacillales" "Lactob…
GATGAACGCTGGCGGCGTGCCTAACACATGCAAGTCGAACGGAGTTTTAAGACGGAAGTTTTCGGATGGAAGACTTAAGACTTAGTGGCGGACGGGTGAGTAACGCGTGGGTAACCTGCCTCATACAGGGGAATAACAGTTAGAAATGACTGCTAAAACCGCATAATATGGCGATACCGCATGATATTGCCATCAAATATTTATAGGTATGAGATGGGCCCGCGTCTGATTAGCCAGTTGGCAGGGTAATGGCCTACCAAAGCGACGATCAGTAGCCGGCTTGAGAGAGTGACCGGCCACATTGGGACTGAGACACGGCCCAA "Bacteria" "Firmicutes" "Clostridia" "Clostridiales" "Lachnospiraceae" "Lac…
GACGAACGCTGGCGGCGTGCCTAACACATGCAAGTCGAACGAAGCTTGATGATGGATTTCTTCGGAAAGAAATCTGATATGACTGAGTGGCGGACGGGTGAGTAACGCGTGAGTAACCTGCCCTTAGGAAAGGGATAGCGTCTGGAAACGGACGGTAATACCATATAAAGTATATTAACGGCATCGTAGATATACCAAAGCTGAGGCGCCTAAGGATGGACTCGCGTCTGATTAGATAGTTGGTGGGGTAACGGCCTACCAAGTCGACGATCAGTAGCCGGACTGAGAGGTTGAACGGCCACATTGGGACTGAGACACGGCCCAG "Bacteria" "Firmicutes" "Clostridia" "Clostridiales" "Ruminococcaceae" NA…
GATAAACGCTGGCGGCGCACATAAGACATGCAAGTCGAACGAACTTAATACCTTGCTTGCAAGGTAAGCGGTTAGTGGCGGACTGGTGAGTAACACGTAAGGAACCTGCCTATTAGAGAGGAATACCAGTGAGAAATCACTGCTAATACCTCATATGCCTTAGTTATCGCATGATAATAGAGGGAAAGGAGCAATCCACTAATAGATGGCCTTGCGCCTGATTAACTAGTTGGTGAGATAAAAGCCCACCAAGGTAACGATCAGTAGCCGAACTGAGAGGTTGAACGGCCACATTGGGACTGAGATACGGCCCAG "Bacteria" "Firmicutes" "Clostridia" "Clostridiales" "Ruminococcaceae" "Ruminococca…
GATGAACGCTGGCGGCGTGCCTAACACATGCAAGTCGAGCGAGAAGCTCTTGAACGATTCTTCGGAAAAGTGATAGAGTGGAAAGCGGCGGACGGGTGAGTAACGCGTAGGCAACCTGCCCTTTGCACAGGGATAGCCATTGGAAACGATGATTAAAACCTGATAACACCATTTTATCACATGGAAAGATGGTCAAAGATTTATCGGCAAAGGATGGGCCTGCGTCTGATTAGCTAGTTGGTGAGGTAACGGCTCACCAAGGCGACGATCAGTAGCCGACCTGAGAGGGTGATCGGCCACATTGGAACTGAGACACGGTCCAA "Bacteria" "Firmicutes" "Clostridia" "Clostridiales" "Family_XIII" NA NA
GATGAACGCTGGCGGCGTGCCTAACACATGCAAGTCGAACGAAGTTACTTGCTTAGATCTCTTCGGAGTGACGAGCTTTTAACTTAGTGGCGGACGGGTGAGTAACACGTGAGCAACCTGCCTTTCAGAGGGGGATAACGGCTGGAAACGGTCGCTAATACCGCATGACATATTGAATCGGCATCGGTTTAATATCAAAGGAGCAATCCGCTGAAAGATGGGCTCGCGTCTGATTAGATAGTTGGTGGGGTAACGGCCTACCAAGTCGACGATCAGTAGCCGGACTGAGAGGTTGAACGGCCACATTGGGACTGAGATACGGCCCAG "Bacteria" "Firmicutes" "Clostridia" "Clostridiales" "Ruminococcaceae" …
GATGAACGCTAGCGGCAGGCTTAACACATGCAAGTCGAGGGGCAGCATGGGAGTAGTAATACTTCTGATGGCGACCGGCGCACGGGTGCGTAACGCGTATGCAACCTACCTGTAACAGGGGGATAACACTGAGAAATCGGTACTAATACCGCATAACACTATGAGAGGCATCTCTTGTGGTTGAAAGTTTCGGCGGTTACAGATGGGCATGCGTTGTATTAGCTGGTTGGTAAGGTAACGGCTTACCAAGGCGACGATACATAGGGGGACTGAGAGGTTAACCCCCCACATTGGTACTGAGACACGGACCAA "Bacteria" "Bacteroidetes" "Bacteroidia" "Bacteroidales" "Rikenellaceae" "Alistipes" NA
GATGAACGCTGGCGGCGTGCTTAACACATGCAAGTCGAACGGGACTTTATTGAAACCTAGTGATGTAAAGTTTAGTGGCGGACGGGTGAGTAACGCGTGGATAACCTGCCGTATACAGGGGGATAACACTTAGAAATAGGTGCTAAAACCGCATAAGCGCACAGCTTCGCATGAAGCAGTGTGAAAAACTCCGGTGGTATACGATGGATCCGCGTCTGATTAGCCAGTTGGCGGGGTAACGGCCCACCAAAGCGACGATCAGTAGCCGGCCTGAGAGGGCGGACGGCCACATTGGGACTGAGACACGGCCCAG "Bacteria" "Firmicutes" "Clostridia" "Clostridiales" "Lachnospiraceae" "Lachnospirace…
ATTGAACGCTGGCGGCAGGCTTAACACATGCAAGTCGAACGATGACTCTCTAGCTTGCTAGAGATGATTAGTGGCGGACGGGTGAGTAACATTTAGGAATCTGCCTAGTAGTGGGGGATAGCTCGGGGAAACTCGAATTAATACCGCATACGACCTACGGGTGAAAGGGGGCGCAAGCTCTTGCTATTAGATGAGCCTAAATCAGATTAGCTAGTTGGTGGGGTAAAGGCCCACCAAGGCGACGATCTGTAACTGGTCTGAGAGGATGATCAGTCACACCGGAACTGAGACACGGTCCGG "Bacteria" "Proteobacteria" "Gammaproteobacteria" "Pseudomonadales" "Moraxellaceae" "Enhydrobacter…
GATAAACGCTGGCGGCGCACATAAGACATGCAAGTCGAACGAACTTAACCAATTGTTTTACTTTTGGAGCGGTTAGTGGCGGACTGGTGAGTAACACGTAAGCAACCTGCCTATCAGAGGGGAACAACAGTTAGAAATGACTGCTAATACCGCATATGCCATGAATATCACATGATATAAATGGGAAAGGAGCAATCCGCTGATAGATGGGCTTGCGTCTGATTAGATAGTTGGTGGGGTAACGGCCTACCAAGTCGACGATCAGTAGCCGGACTGAGAGGTTGAACGGCCACATTGGGACTGAGATACGGCCCAG "Bacteria" "Firmicutes" "Clostridia" "Clostridiales" "Ruminococcaceae" "Ruminococc…
GATGAACGCTGGCGGCATGCCTAAGACATGCAAGTCGAACGAGGTGGCCCATTGAAGTCTGAGTGCTTGCACAAAGATGGATTTGGATTTTCCACCTAGTGGCAAACGGGTGAGTAACACGTGGGTTACCTGCCTCTAAGTTGGGGATAACAACTGGAAACGGTTGATAATACCGAATGTGCTCTACGGAGTAAAGAAGCCCTTAAAGCTTCGCTTAGAGATGGGCCTGCGGCGTATTAGTTAGTTGGTGGGGTAATGGCCTACCAAGACAGCGATGCGTAGCCGAACTGAGAGGTTAATCGGCCACACTGGGACTGAGACACGGCCCAG "Bacteria" "Tenericutes" "Mollicutes" "Mollicutes_RF39" NA NA NA
GATGAACGCTGGCGGCGTGCTTAACACATGCAAGTCGAACGGAGATATCATTTTCGAAGCGATTAGTTTACTAAGAGCGGAGATGTTGCTATCTTAGTGGCGGACGGGTGAGTAACGCGTGGGTAACCTGCCTTGCACTGGGGGATAACACTTAGAAATAGGTGCTAATACCGCATAACAGTAGGAGACGCATGTCTTTTACTTGAAAACTCCGGTGGTGTAAGATGGACCCGCGTCTGATTAGCTTGTTGGCGGGGTAACGGCCCACCAAGGCAACGATCAGTAGCCGGCCTGAGAGGGTGAACGGCCACATTGGGACTGAGACACGGCCCAA "Bacteria" "Firmicutes" "Clostridia" "Clostridiales" "Lachnospir…
GATGAACGCTAGCGGCAGGCCTAACACATGCAAGTCGAGGGGCAGCGGGGATGTAGCAATACATCTGCCGGCGACCGGCGCACGGGTGCGTAACGCGTATGCAACCTACCCATAACAGGGGGATAACACCGAGAAATTGGTACTAATACCCCATAATATTTGATAAGGCATCTTATTGAGTTGAAAACTCCGGTGGTTATGGATGGGCATGCGTTGTATTAGTTAGTTGGTGAGGTAACGGCTCACCAAGACGACGATACATAGGGGGACTGAGAGGTTAACCCCCCACATTGGTACTGAGACACGGACCAA "Bacteria" "Bacteroidetes" "Bacteroidia" "Bacteroidales" "Rikenellaceae" "Alistipes" NA
GACGAACGCTGGCGGCGTGCTTAACACATGCAAGTCGAACGGAGTGCCTCGGAAAGAGATTTCGGTCAATGGAAGAGGATACTTAGTGGCGGACGGGTGAGTAACGCGTGAGGAACCTACCTCTCAGAGGGGGACAACAGTTGGAAACGACTGCTAATACCGCATAATATATCTGTATCGCATGGTATGGATATCAAAGATTTATCGCTGAGAGATGGCCTCGCGTCTGATTAGCTAGTTGGTAGGGTAACGGCCTACCAAGGCGACGATCAGTAGCCGGACTGAGAGGTTGGCCGGCCACATTGGGACTGAGATACGGCCCAG "Bacteria" "Firmicutes" "Clostridia" "Clostridiales" "Ruminococcaceae" "Ru…
GATGAACGCTAGCGACAGGCTTAACACATGCAAGTCGAGGGGCAGCGGGTAGATGAGCTTGCTCATTTATGCCGGCGACCGGCGCACGGGTGAGTAACACGTATGCAACCTGCCCGTCTCAGGGGGATAATCGTCGGAAACGGCGTCTAATACCCCGTATGAAGCTGGATGGCATCGTCTGGTTTTGAAAGAATATCGGAGACGGATGGGCATGCGGCGCATTAGCTAGTTGGCGGGGTAACGGCCCACCAAGGCGACGATGCGTAGGGGTTCTGAGAGGAAGGTCCCCCACACTGGTACTGAGACACGGACCAG "Bacteria" "Bacteroidetes" "Bacteroidia" "Bacteroidales" "Muribaculaceae" NA NA
GATGAACGCTGGCGGCGTGCCTAACACATGCAAGTCGAACGGACTTATATTGAAACCTAGTGATTTATGAGTTAGTGGCGGACGGGTGAGTAACGCGTGGAAAACCTGCCGTATACCGGGGGATAACACTTAGAAATAGGTGCTAATACCGCATAAGCGCACAGCTTCGCATGAAGCAGTGTGAAAAACTCCGGTGGTATACGATGGTTCCGCGTCTGATTAGCTAGTTGGCGGGGTAACGGCCCACCAAGGCAGCGATCAGTAGCCGGCCTGAGAGGGTGAACGGCCACATTGGGACTGAGACACGGCCCAA "Bacteria" "Firmicutes" "Clostridia" "Clostridiales" "Lachnospiraceae" "Lachnospirace…
GACGAACGCTGGCGGCGCGCCTAACACATGCAAGTCGAACGGAAGCAATTGGAGTTTACTTTAATTGCTTTAGTGGCGGACGGGTGAGTAACACGTGAGCAACCTGCCTTTCAGAGGGGGATAACGTTTGGAAACGAACGCTAATACCGCATGACATATTCTGCAGGCATCTGCGGGATATCAAAGGAGCAATCCGCTGAAAGATGGGCTCGCGTCCGATTAGCTAGATGGTGAGGTAACGGCTCACCATGGCGACGATCGGTAGCCGGACTGAGAGGTTGACCGGCCACATTGGGACTGAGACACGGCCCAG "Bacteria" "Firmicutes" "Clostridia" "Clostridiales" "Ruminococcaceae" NA NA
GATGAACGCTAGCGGCAGGCTTAACACATGCAAGTCGAGGGGCAGCATGGGAGTAGCAATACTTCTGATGGCGACCGGCGCACGGGTGCGTAACGCGTATGCAACCTACCTGTAACAGGGGGATAACACTGAGAAATCGGTACTAATACCGCATAACACTATGAGAGGCATCTCTTGTGGTTGAAAGTTTCGGCGGTTACAGATGGGCATGCGTTGTATTAGCTGGTTGGTAAGGTAACGGCTTACCAAGGCGACGATACATAGGGGGACTGAGAGGTTAACCCCCCACATTGGTACTGAGACACGGACCAA "Bacteria" "Bacteroidetes" "Bacteroidia" "Bacteroidales" "Rikenellaceae" "Alistipes" NA
GATAAACGCTGGCGGCGCACATAAGACATGCAAGTCGAACGAACTTAATACCTTGCTTGCAAGGTAAGCGGTTAGTGGCGGACTGGTGAGTAACACGTAAGGAACCTGCCTATTAGAGAGGAATACCAGTGAGAAATCACTGCTAATACCTCATATGCCTTATTTATCGCATGATAAAAGAGGGAAAGGAGCAATCCACTAATAGATGGCCTTGCGCCTGATTAACTAGTTGGTGAGATAAAAGCCCACCAAGGTAACGATCAGTAGCCGAACTGAGAGGTTGAACGGCCACATTGGGACTGAGATACGGCCCAG "Bacteria" "Firmicutes" "Clostridia" "Clostridiales" "Ruminococcaceae" "Ruminococca…
GATGAACGCTAGCGACAGGCTTAACACATGCAAGTCGAGGGGCAGCGGGGGCGAAGCTTGCTTCGCCTGCCGGCGACCGGCGCACGGGTGAGTAACACGTATGCGACCTGCCCCCCGCAGGGGGATAACCGGGAGAAATCCCGACTAATACCGCGTAACGCCGCGGGGCTGCATGGCCCCGCGGCCAAAGGAAGCGATTCCGGCGGGGGATGGGCATGCGGCGCATTAGCTAGTCGGCGGGGTAACGGCCCACCGAGGCGACGATGCGTAGGGGTTCTGAGAGGAAGGTCCCCCACACTGGTACTGAGACACGGACCAG "Bacteria" "Bacteroidetes" "Bacteroidia" "Bacteroidales" "Muribaculaceae" NA NA
GATGAACGCTGGCGGTGTGCCTAATACATGCAAGTCGAACGCGTTGGCCCAATTGATTGATGGTGCTTGCACCTGATTGATTTTGGTCGCCAACGAGTGGCGGACGGGTGAGTAACACGTAGGTAACCTGCCCAGAAGCGGGGGACAACATTTGGAAACAGATGCTAATACCGCATAACAACGTTGTTCGCATGAACAACGCTTAAAAGATGGCTTCTCGCTATCACTTCTGGATGGACCTGCGGTGCATTAGCTTGTTGGTAGGGTAATGGCCTACCAAGGCGATGATGCATAGCCGAGTTGAGAGACTGATCGGCCACAATGGGACTGAGACACGGCCCAT "Bacteria" "Firmicutes" "Bacilli" "Lactobacillales" "La…
GACGAACGCTGGCGGCATGCTTAACACATGCAAGTCGAACGGAGCACCCCTGAACGAGGTTTCGGCCGAAGTGACGGGAATGCTTAGTGGCGGACGGGTGAGTAACGCGTGAGCAACCTGCCTTGAAGTGGGGGACAACAGTTGGAAACGACTGCTAATACCGCATAATATATCTGAGTCGCATGGCTTGGATATCAAAGATTTATCGCTTCAAGATGGGCTCGCGTCTGATTAGGTAGTTGGCGGGGTAACGGCCCACCAAGCCGACGATCAGTAGCCGGACTGAGAGGTTGAACGGCCACATTGGGACTGAGATACGGCCCAG "Bacteria" "Firmicutes" "Clostridia" "Clostridiales" "Ruminococcaceae" "R…
GATAAACGCTGGCGGCATGCCTAACACATGCAAGTCGAACGGAGCGCCTTGGAAGGAGACTTCGGTCAACGGAAGAGGAGGCTTAGTGGCGGACGGGTGAGTAACGCGTGAGGAACCTGCCTCAGAGAGGGGGATAACACACCGAAAGGTGTGCTAATACCGCATAACATATGAGAGGGGCATCCCTTTTATATCAAAGATTTATTGCTCTGAGATGGCCTCGCGTCCAATTAGCTAGTTGGTGAGGTAACGGCCCACCAAGGCGACGATTGGTAGCCGGACTGAGAGGTTGAACGGCCACATTGGGACTGAGACACGGCCCAG "Bacteria" "Firmicutes" "Clostridia" "Clostridiales" "Ruminococcaceae" "Ru…
GATGAACGCTGGCGGCATGCCTAATACATGCAAGTCGAACGAGAGACCTTCGGGTCTCTAGTGGCGAACGGGTGAGTAACACGTAGGGAACCTGCCCGCGCACCGGGAATACGCTCTGGAAACGGAGAACAAATCCCGATGTACAGGAAGGAGGCATCTTCTTTCTGTGAAACATCCTTTCGGGGATGGGGCGCGGATGGACCTGCGGTGCATTAGTTGGTTGGCGGGGTAAAGGCCCACCAAGACGATGATGCATAGCCGGCCTGAGAGGGCGGACGGCCACATTGGGACTGAGACACGGCCCAG "Bacteria" "Firmicutes" "Erysipelotrichia" "Erysipelotrichales" "Erysipelotrichaceae" "Faeca…
GATGAACGCTAGCGACAGGCTTAACACATGCAAGTCGAGGGGCAGCGGGGAGCAAGCTTGCTTGCTCTGCCGGCGACCGGCGCACGGGTGAGTAACACGTATGCAACCTGCCCTCCGCAGGGGGATAACCCGGAGAAATCCGGACTAATACCGCGTGGTACACCAGTGGGGCATCCCACTGGTGTTAAAAGGAAGTGATTCCGGCGGAGGATGGGCATGCGGCGCATTAGCTTGTTGGCGGGGTAACGGCCCACCAAGGCAACGATGCGTAGGGGTTCTGAGAGGAAGGTCCCCCACACTGGTACTGAGACACGGACCAG "Bacteria" "Bacteroidetes" "Bacteroidia" "Bacteroidales" "Muribaculaceae" NA NA
GATGAACGCTGGCGGCGTGCTTAACACATGCAAGTCGAACGGACTCATATTGAAACCTAGTGAAGTATGAGTTAGTGGCGGACGGGTGAGTAACGCGTGGAAAACCTGCCGTATACTGGGGGATAACACTTAGAAATAGGTGCTAATACCGCATAAGCGCACAGCTTCGCATGAAGCAGTGTGAAAAACTGAGGTGGTATACGATGGTTCCGCGTCTGATTAGCTAGTTGGTGGGGTAAAAGCCTACCAAGGCAACGATCAGTAGCCGGCCTGAGAGGGTGAACGGCCACATTGGGACTGAGACACGGCCCAA "Bacteria" "Firmicutes" "Clostridia" "Clostridiales" "Lachnospiraceae" "Lachnospirace…
GATGAACGCTGGCGGCGTGCCTAACACATGCAAGTCGAGCGAAGCGCGCCCCGGAATCCTTCGGGAGGAAGGGTCGCGACTGAGCGGCGGACGGGTGAGTAACGCGTGGGCAACCTGCCCCATACAGGGGGACAACGGCCGGAAACGGCCGCTAATACCGCATGATTCCTCTTGGCCGCATGGCCGGGAGGGGAAAGCCGAGACGGTATGGGATGGACCCGCGTCTGATTAGCTGGTTGGCGAGGTAACGGCTCACCAAGGCGACGATCAGTAGCCGGCCTGAGAGGGCGACCGGCCACATTGGGACTGAGACACGGCCCAA "Bacteria" "Firmicutes" "Clostridia" "Clostridiales" "Lachnospiraceae" NA NA
ATTGAACGCTGGCGGCATGCCTTACACATGCAAGTCGAACGGTAACAGGTCTTCGGATGCTGACGAGTGGCGAACGGGTGAGTAATACATCGGAACGTGCCCGATCGTGGGGGATAACGAGGCGAAAGCTTTGCTAATACCGCATACGATCTACGGATGAAAGCGGGGGATCTTCGGACCTCGCGCGGACGGAGCGGCCGATGGCAGATTAGGTAGTTGGTGGGATAAAAGCTTACCAAGCCGACGATCTGTAGCTGGTCTGAGAGGATGATCAGCCACACTGGGACTGAGACACGGCCCAG "Bacteria" "Proteobacteria" "Gammaproteobacteria" "Betaproteobacteriales" "Burkholderiaceae" "Di…
GATGAACGCCGGCGGTGTGCCTAATACATGCAAGTCGAACGCGTTGGCCCAATTGATTGATGGTGCTTGCACCTGATTGATTTTGGTCGCCAACGAGTGGCGGACGGGTGAGTAACACGTAGGTAACCTGCCCAGAAGCGGGGGACAACATTTGGAAACAGATGCTAATACCGCATAACAACGTTGTTCGCATGAACAACGCTTAAAAGATGGCTTCTCGCTATCACTTCTGGATGGACCTGCGGTGCATTAGCTTGTTGGTGGGGTAACGGCCTACCAAGGCGATGATGCATAGCCGAGTTGAGAGACTGATCGGCCACAATGGGACTGAGACACGGCCCAT "Bacteria" "Firmicutes" "Bacilli" "Lactobacillales" "La…
ATTGAACGCTGGCGGAACGCTTTACACATGCAAGTCGAACGGTAACAGCGAGGAAAGCTTGCTTTTTTCGGCTGACGAGTGGCGAACGGGTGAGTAATACATCGGAACGTGTCCGCTCGTGGGGGACAACCATCCGAAAGGATGGCTAATACCGCATGAGTTCTACGGAAGAAAGAGGGGGACCTGCTTGCAGGCCTCTCGCGAGCGGAGCGGCCGATGACTGATTAGCCGGTTGGTGAGGTAACGGCTCACCAAAGCAACGATCAGTAGCTGGTCTGAGAGGACGACCAGCCACACTGGGACTGAGACACGGCCCAG "Bacteria" "Proteobacteria" "Gammaproteobacteria" "Betaproteobacteriales" "Burkh…
GATGAACGCTGGCGGCGTGCCTAACACATGCAAGTCGAACGGACAGATATGGAAACCTAGTGAAATATCTGTTAGTGGCGGACGGGTGAGTAACGCGTGGATGACCTGCCATATACAGGGGGATAACACTTAGAAATAGGTGCTAATACCGCATAAGCGCACAGCTTCGCATGAAGGAGTGTGAAAAACTAAGGTGGTATATGATGGATCCGCGTCTGATTAGCCAGTTGGTGAGGTAACGGCTCACCAAAGCGACGATCAGTAGCCGGCCTGAGAGGGCGGACGGCCACATTGGGACTGAGACACGGCCCAG "Bacteria" "Firmicutes" "Clostridia" "Clostridiales" "Lachnospiraceae" "Lachnospirace…
GATGAACGCTGGCGGCGTGCTTAACACATGCAAGTCGAACGGAACACCCTTGAAGGAGTTTTCGGACAACTGAAAGGACTGTTTAGTGGCGGACGGGTGAGTAACGCGTGAGTAACCTGCCTTGGAGTGGGGAATAACAGTTGGAAACAGCTGCTAATACCGCATAATGCAGTTGAGTCGCATGGCTCTGACTGCCAAAGATTTATCGCTCTGAGATGGACTCGCGTCTGATTAGCTAGTTGGTGGGGCAACGGCCCACCAAGGCGACGATCAGTAGCCGGACTGAGAGGTTGGCCGGCCACATTGGGACTGAGACACGGCCCAG "Bacteria" "Firmicutes" "Clostridia" "Clostridiales" "Ruminococcaceae" "R…
GACGAACGCTGGCGGCGTGCTTAACACATGCAAGTCGAACGGAGTGCCTTGGAAAGAGATTTCGGTCAATGGAAGAGGTTACTTAGTGGCGGACGGGTGAGTAACGCGTGAGGAACCTGCCTTTCAGAGGGGGACAACAGTTGGAAACGACTGCTAATACCGCATAATATATGTTTGTCGCATGGCAGATATATCAAAGATTTATCGCTGAGAGATGGCCTCGCGTCTGATTAGCTAGTTGGTAGGGTAATGGCCTACCAAGGCGACGATCAGTAGCCGGACTGAGAGGTTGGCCGGCCACATTGGGACTGAGATACGGCCCAG "Bacteria" "Firmicutes" "Clostridia" "Clostridiales" "Ruminococcaceae" "Ru…
GATGAACGCTGGCGGCGTGCTTAACACATGCAAGTCGAACGGAGATATCATTTTCGAAGCGATTAGTTTACTAAGAGTAGAGATGTTGATATCTTAGTGGCGGACGGGTGAGTAACGCGTGGGTAACCTGCCTTACACTGGGGGATAACACTTAGAAATAGGTGCTAATACCGCATAATAGGAGAAGACGCATGTCTTATCCTTGAAAACTCCGGTGGTGTAAGATGGACCCGCGTCTGATTAGCCAGTTGGCGGGGTAACGGCCCACCAAAGCGACGATCAGTAGCCGGCCTGAGAGGGTGAACGGCCACATTGGGACTGAGACACGGCCCAA "Bacteria" "Firmicutes" "Clostridia" "Clostridiales" "Lachnospir…
GACGAACGCTGGCGGCGTGCCTAATACATGCAAGTCGAACGAACGGAGGAAGAGCTTGCTCTTCCAAAGTTAGTGGCGGACGGGTGAGTAACACGTGGGCAACCTGCCTGTAAGTTGGGGATAACTCCGGGAAACCGGGGCTAATACCGAATGATAAAGTTTGGCGCATGCCACGCTTTTGAAAGATGGTTTCGGCTATCGCTTACAGATGGGCCCGCGGTGCATTAGCTAGTTGGTAGGGTAATGGCCTACCAAGGCAACGATGCATAGCCGACCTGAGAGGGTGATCGGCCACACTGGGACTGAGACACGGCCCAG "Bacteria" "Firmicutes" "Bacilli" "Bacillales" "Listeriaceae" "Listeria" "monocy…
ATTGAACGCTGGCGGCAGGCCTAACACATGCAAGTCGAACGGTAACAGGAAACAGCTTGCTGTTTCGCTGACGAGTGGCGGACGGGTGAGTAATGTCTGGGAAACTGCCTGATGGAGGGGGATAACTACTGGAAACGGTAGCTAATACCGCATAACGTCGCAAGACCAAAGAGGGGGACCCTCGGGCCTCTTGCCATCGGATGTGCCCAGATGGGATTAGCTTGTTGGTGGGGTAACGGCTCACCAAGGCGACGATCCCTAGCTGGTCTGAGAGGATGACCAGCCACACTGGAACTGAGACACGGTCCAG "Bacteria" "Proteobacteria" "Gammaproteobacteria" "Enterobacteriales" "Enterobacteriacea…
GATGAACGCTGGCGGCGTGCCTAACACATGCAAGTCGAACGGGCCGCGCCTGAAACCTAGTGAAGGCGCGGCCAGTGGCGGACGGGTGAGTAACGCGTGGGCAACCTGCCGCGCACAGGGGGACAACGGCCGGAAACGGCCGCTAATACCGCATAGTCCCGCGGGGCCGCATGGCCCTGCGGGGAAAGCCCGGGGCGACCCGGACGGTGCGCGATGGGCCCGCGTCCGATTAGCTTGTTGGCGGGGCAGCGGCCCACCAAGGCGACGATCGGTAGCCGGCCTGAGAGGGCGGACGGCCACACTGGGACTGAGACACGGCCCAG "Bacteria" "Firmicutes" NA NA NA NA NA
GATGAACGCTAGCGACAGGCTTAACACATGCAAGTCGAGGGGCAGCGGAGGCGAGAGCTTGCTCTCGCCTGCCGGCGACCGGCGCACGGGTGAGTAACACGTATGCAACCTGCCCCCTGCAGGAGGATAACCGGGAGAAATCCCGACTAATACTGCATAACACCCTGGGGCTACATGGCTTCGGGGTCAAAGGAAGCAATTCCGGCAGGGGATGGGCATGCGGCGCATTAGCCAGTTGGCGGGGTAACGGCCCACCAAAGCGACGATGCGTAGGGGTTCTGAGAGGAAGGTCCCCCACATTGGTACTGAGACACGGACCAA "Bacteria" "Bacteroidetes" "Bacteroidia" "Bacteroidales" "Muribaculaceae" NA …
ATTGAACGCTGGCGGCAGGCCTAACACATGCAAGTCGAACGGTAACAGGAAGCAGCTTGCTGCTTCGCTGACGAGTGGCGGACGGGTGAGTAATGTCTGGGAAACTGCCTGATGGAGGGGGATAACTACTGGAAACGGTAGCTAATACCGCATAATGTCGCAAGACCAAAGAGGGGGACCTTCGGGCCTCTTGCCATCGGATGTGCCCAGATGGGATTAGCTTGTTGGTGGGGTAACGGCTCACCAAGGCGACGATCCCTAGCTGGTCTGAGAGGATGACCAGCCACACTGGAACTGAGACACGGTCCAG "Bacteria" "Proteobacteria" "Gammaproteobacteria" "Enterobacteriales" "Enterobacteriacea…
GATGAACGCTGGCGGCGTGCTTAACACATGCAAGTCGAACGGGGATGCTTATGGAAGGAGTGCTTGCATTCCGGAAGGATGTATCTTAGTGGCGGACGGGTGAGTAACGCGTGGGTAACCTGCCCCATACCGGGGGATACCACCTGGAAACAGGTGCTAATACCGCATAAGCGCACGGGAGCGCATGCTCCTGTGTGAAAAACTCCGGTGGTATGGGATGGACCCGCGTCTGATTAGCCAGTTGGCAGGGTAACGGCCTACCAAAGCGACGATCAGTAGCCGGCCTGAGAGGGTGGACGGCCACATTGGGACTGAGACACGGCCCAA "Bacteria" "Firmicutes" "Clostridia" "Clostridiales" "Lachnospiraceae" …
GATGAACGCTGGCGGCGTGCCTAATACATGCAAGTCGAACGAAACTTCTTTATCACCGAGTGCTTGCACTCACCGATAAAGAGTTGAGTGGCGAACGGGTGAGTAACACGTGGGCAACCTGCCCAAAAGAGGGGGATAACACTTGGAAACAGGTGCTAATACCGCATAACCATAGTTACCGCATGGTAACTATGTAAAAGGTGGCTATACTACCGCTTTTGGATGGGCCCGCGGCGCATTAGCTAGTTGGTAGGGTAAAGGCTTACCAAGGCAATGATGCGTAGCCGAATTGAGAGGTTGATCGGCCACATTGGGACTGAGACACGGCCCAA "Bacteria" "Firmicutes" "Bacilli" "Lactobacillales" "Lactobacillac…
GATGAACGCCGGCGGTGTGCCTAATACATGCAAGTCGAACGCGTTGGCCCAATTGATTGACGGTGCTTGCACCTGATTGATTTTGGTCGCCAACGAGTGGCGGACGGGTGAGTAACACGTAGGTAACCTGCCCAGAAGCGGGGGACAACATTTGGAAACAGATGCTAATACCGCATAACAACGTTGTTCGCATGAACAACGCTTAAAAGATGGCTTCTCGCTATCACTTCTGGATGGACCTGCGGTGCATTAGCTTGTTGGTGGGGTAATGGCCTACCAAGGCGATGATGCATAGCCGAGTTGAGAGACTGATCGGCCACAATGGGACTGAGACACGGCCCAT "Bacteria" "Firmicutes" "Bacilli" "Lactobacillales" "La…
GATGAACGCTAGCGACAGGCTTAACACATGCAAGTCGAGGGGCAGCGGGGGATGCGTTCGCGCATTCTGCCGGCGACCGGCGCACGGGTGAGTAACACGTATGCAACCTGCCCCGTCCAGGGGGATAATCGGCGGAAACGCCGTCTAATACCGCGTATATCGGTACCGGGCATCCGGGATTGAAGAAAGGGCCTTAGGGTCCGGGACGGGATGGGCATGCGGCGCATTAGGAAGTTGGCGGTGTAACGGACCACCAATCCGTCGATGCGTAGGGGTTCTGAGAGGAAGGCCCCCCACACTGGTACTGAGACACGGACCAG "Bacteria" "Bacteroidetes" "Bacteroidia" "Bacteroidales" "Muribaculaceae" NA NA
GATGAACGCTGGCGGCGTGCCTAATACATGCAAGTCGAGCGAACGGACGAGAAGCTTGCTTCTCTGATGTTAGCGGCGGACGGGTGAGTAACACGTGGATAACCTACCTATAAGACTGGGATAACTTCGGGAAACCGGAGCTAATACCGGATAATATTTTGAACCGCATGGTTCAAAAGTAAAAGACGGTCTTGCTGTCACTTATAGATGGATCCGCGCTGCATTAGCTAGTTGGTAAGGTAACGGCTTACTAAGGCAACGATGCATAGCCGACCTGAGAGGGTGATCGGCCACACTGGAACTGAGACACGGTCCAG "Bacteria" "Firmicutes" "Bacilli" "Bacillales" "Staphylococcaceae" "Staphylococcu…
GATGAACGCTAGCGACAGGCTTAACACATGCAAGTCGAGGGGCAGCGGGGGTAGCAATACCCGCCGGCGACCGGCGCACGGGTGAGTAACGCGTATGCAACTTACCTATCAGAGGGGGATAACCCGGCGAAAGTCGGACTAATACCGCATGAAGCAGGGGCCCCGCATGGGGATATTTGCTAAAGATTCATCGCTGATAGATAGGCATGCGTTCCATTAGGCAGTTGGCGGGGTAACGGCCCACCAAACCGACGATGGATAGGGGTTCTGAGAGGAAGGTCCCCCACATTGGTACTGAGACACGGACCAA "Bacteria" "Bacteroidetes" "Bacteroidia" "Bacteroidales" "Tannerellaceae" "Parabacteroid…
GATGAACGCTAGCGACAGGCTTAACACATGCAAGTCGAGGGGCAGCGGGGGCGAAAGCTTGCTTTCGCCTGCCGGCGACCGGCGCACGGGTGAGTAACACGTATGGAACCTGCCCTATGCAGGGGGATAAGCGGAAGAAATTCCGTCTAATACCGCATAACACCATTTGGAGACATCTCCAGGGGGTCAAAGGAGGCGACTCCGGCATAGGATGGCCATGCGTCGCATTAGCTAGTCGGCGGGGTAACGGCCCACCGAGGCGACGATGCGTAGGGGTTCTGAGAGGAAGGTCCCCCACACTGGTACTGAGACACGGACCAG "Bacteria" "Bacteroidetes" "Bacteroidia" "Bacteroidales" "Muribaculaceae" NA …
GACGAACGCTGGCGGCGTGCTTCAAACATGCAAGTCGAACGGAGTGAGAGCGAGCTTGCTCGCTCTCACTTAGTGGCGGACTGGTGAGTAACGCGTGAGCAATCTGCCTATCAAAGGGGGATAACAGAGGGAAACTTCTGCTAATACCGCATAAGACCACGGTGGGGCATCCCACAGAGGTCAAAGGAGCAATCCGATGATAGATGAGCTTGCGTTTCATTAGCTAGTTGGTAAGGTAACGGCTTACCAAGGCGACGATGAATAGCCGATCTGAGAGGATGACCGGCCACACTGGGACTGAGATACGGCCCAG "Bacteria" NA NA NA NA NA NA
GACGAACGCTGGCGGCGCGCCTAACACATGCAAGTCGAACGAAGGGAAGGGGGCTTGCCCCCTGAACTTAGTGGCGGACGGGTGAGTAACACGTGAGCAACCTGCCCTATAGAGGGGGATAACGTTTGGAAACGAACGCTAATACCGCATAACGCGCTGGGGGGACATCCCTTTGGCGCCAAAGGAGCAATCCGCTATAGGATGGGCTCGCGTCCGATTAGATAGTTGGCGGGGTAACGGCCCACCAAGTCGACGATCGGTAGCCGGACTGAGAGGTTGAACGGCCACATTGGGACTGAGACACGGCCCAG "Bacteria" "Firmicutes" "Clostridia" "Clostridiales" "Ruminococcaceae" NA NA
ATTGAACGCTGGCGGCAGGCCTAACACATGCAAGTCGAACGGTAACAGGAAGCAGCTTGCTGCTTCGCTGACGAGTGGCGGACGGGTGAGTAATGTCTGGGAAACTGCCTGATGGAGGGGGATAACTACTGGAAACGGTGGCTAATACCGCATAACGTCGCAAGACCAAAGAGGGGGACCTTCGGGCCTCTTGCCATCAGATGTGCCCAGATGGGATTAGCTTGTTGGTGAGGTAACGGCTCACCAAGGCGACGATCCCTAGCTGGTCTGAGAGGATGACCAGCCACACTGGAACTGAGACACGGTCCAG "Bacteria" "Proteobacteria" "Gammaproteobacteria" "Enterobacteriales" "Enterobacteriacea…
GATGAACGCTAGCGGCAGGCTTAACACATGCAAGTCGAGGGGTAGAAGCAGCTTGCTGCTTTGAGACCGGCGCACGGGTGCGTAACGCGTATGCAATCTACCTTTTACAGAGGGATAGCCCAGAGAAATTTGGATTAATACCTCATAGTATGTGAGAATCGCATGGTTTTCACATTAAAGTTCCAACGGTAAAAGATGAGCATGCGTCCCATTAGCTAGATGGTAAGGTAACGGCTTACCATGGCGACGATGGGTAGGGGTCCTGAGAGGGAGATCCCCCACACTGGTACTGAGACACGGACCAG "Bacteria" "Bacteroidetes" "Bacteroidia" "Flavobacteriales" "Flavobacteriaceae" "Flavobacteri…
GATGAATGCTGGCGGCGTGCCTAATACATGCAAGTCGAGCGGTAACGGGGCTTCACCGTTCTCTTGTCGCACTTGGCCTTTGAGCAAGTGGTCTGATACGAGGGAACAGTGAAGCTGCCGACGAGCGGCGGACGGCTGAGTAACGCGTGGGAACATACCCCAAACTGAGGGATAACTAGTCGAAAGATTAGCTAATACCGCATGTGATCTTCGGATTAAAGGATTTATCCGGTTTGGGAATGGCCTGCGTACGATTAGATAGTTGGTGAGGTAAAGGCTCACCAAGTCGACGATCGTTAGATGGTTTGAGAGGATGATCATCCAGACTGGGACTGAGACACGGCCCAG "Bacteria" "Patescibacteria" "Saccharimonadia" "Sa…
GATAAACGCTGGCGGCGCACATAAGACATGCAAGTCGAACGAACTTAACCCTTTGTTTACATTGGGAGCGGTTAGTGGCGGACTGGTGAGTAACACGTAAGCAACCTGCCTATTAGAGGGGAATAACAGTGAGAAATCATTGCTAATACCGCATATGCTCACAGTATCACATGATACAGTGAGGAAAGGAGCAATCCGCTAATAGATGGGCTTGCGTCTGATTAGCTAGTTGGTGGGGTAACGGCCTACCAAGGCGACGATCAGTAGCCGGACTGAGAGGTTGAACGGCCACATTGGGACTGAGATACGGCCCAG "Bacteria" "Firmicutes" "Clostridia" "Clostridiales" "Ruminococcaceae" "Ruminococca…
AACGAACGCTGGCGGCATGCCTAACACATGCAAGTCGAACGAGATCCTTCGGGGTCTAGTGGCGCACGGGTGCGTAACGCGTGGGAATCTGCCCTTAGGTTCGGAATAACAGTTAGAAATGACTGCTAATACCGGATGATGACGTTAAGTCCAAAGATTTATCGCCTGAGGATGAGCCCGCGTAGGATTAGCTAGTTGGTGTGGTAAAGGCGCACCAAGGCGACGATCCTTAGCTGGTCTGAGAGGATGATCAGCCACACTGGGACTGAGACACGGCCCAG "Bacteria" "Proteobacteria" "Alphaproteobacteria" "Sphingomonadales" "Sphingomonadaceae" "Sphingomonas" "hankookensis"
GATTAACGCTGGCGGTGCACATAAGACATGCAAGTCGAACGGGAATCGTTATTAATGGAAATAAGATTTATCTGAAATAAGTTAATAACAATGATTTTAGTGGCGGACTGGTGAGTAACACGTAAGCAACCTGCCTATTAGAGGGGAATAACAGTGAGAAATCATTGCTAATACCGCATAAGCTGATAGTATCGCATGGTACAGTCAGAAAAGGAGAAATCCGCTAATAGATGGGCTTGCGTCCGATTAGCTAGTTGGTGGGGTAAAGGCCTACCAAGGCAACGATCGGTAGCCGAGCTGAGAGGCTCAACGGCCACATTGGGACTGAGATACGGCCCAG "Bacteria" "Firmicutes" "Clostridia" "Clostridiales" "Rumi…
GATGAACGCTGGCGGCGTGCCTAACACATGCAAGTCGAACGGGGTTATTTAGGAAATTTCCTTCGGGGAATGGAATCTTTAACCTAGTGGCGGACGGGTGAGTAACGCGTGAGCAATCTGCCTTCGGATGGGGGATAACAGCCGGAAACGGCTGCTAATACCGCATAACACATGGGATCCGCATGTTTCCCATGTCAAAGATTTATCGTCCGGAGATGAGCTCGCGTCTGATTAGCTGGTTGGCGGGGTAACGGCCCACCAAGGCGACGATCAGTAGCCGGACTGAGAGGTTGAACGGCCACATTGGGACTGAGACACGGCCCAG "Bacteria" "Firmicutes" "Clostridia" "Clostridiales" "Ruminococcaceae" "B…
GATAAACGCTGGCGGCGCACATAAGACATGCAAGTCGAACGAACTTAACTCATTCTTTTAGATTGAGAGCGGTTAGTGGCGGACTGGTGAGTAACACGTAAGCAACCTGCCTATCAGAGGGGAATAACAGTGAGAAATCATTGCTAATACCGCATAAGCTAGTAATATCGCATGATATAGCTAGAAAAGGAGCAATCCGCTGATAGATGGGCTTGCGTCTGATTAGCTAGTTGGTGGGGTAACGGCCTACCAAGGCGACGATCAGTAGCCGAACTGAGAGGTTGAACGGCCACATTGGGACTGAGATACGGCCCAG "Bacteria" "Firmicutes" "Clostridia" "Clostridiales" "Ruminococcaceae" "Ruminococc…
GACGAACGCTGGCGGCGTGCCTAACACATGCAAGTCGAGCGGAGACATATTGAGGAAGTTTTCGGATGGAATTGGTATGTTTTAGCGGCGGACGGGTGAGTAACGCGTGAGCAACCTTTCCTTGACAGGGGGATAAGATCTCGAAAGGGGTTCTAATACCGCATAGGACCACAGTGTCACATGACACAGGGGTGAAAGGAGCAATCCAGTCAAGGGTGGGCTCGCGTCTGATTAGATAGTTGGTGAGGTAACGGCCCACCAAGTCAACGATCAGTAGCCGACCTGAGAGGGTGATCGGCCACATTGGGACTGAGACACGGCCCAA "Bacteria" "Firmicutes" "Clostridia" "Clostridiales" "Christensenellaceae…
GATGAACGCTGGCGGCGTGCTTAACACATGCAAGTCGAACGGACTTAACAGGAAACCTAGTGAATGTTAAGTTAGTGGCGGACGGGTGAGTAACGCGTGGGTAACCTGCCGTATACCGGGGGATAACACCTGGAAACAGGTGCTAATACCGCATAAGCGCACGGGACCGCATGGTCCAGTGTGAAAAACCGAGGTGGTATGCGATGGACCCGCGTCTGATTAGCCAGTTGGCAGGGTAACGGCCTACCAAAGCGACGATCAGTAGCCGGCCTGAGAGGGTGGACGGCCACATTGGGACTGAGACACGGCCCAA "Bacteria" "Firmicutes" "Clostridia" "Clostridiales" "Lachnospiraceae" "Lachnospirace…
GACGAACGCTGGCGGCGTGCTTAACACATGCAAGTCGAACGGAGCACCCCAGAAGGAGTTTTCGGACAACGGATGGGAATGCTTAGTGGCGGACTGGTGAGTAACGCGTGAGGAACCTGCCTTCCAGAGGGGGACAACAGTTGGAAACGACTGCTAATACCGCATGACGCATTGGTGTCGCATGGCACTGATGTCAAAGATTTATCGCTGGAAGATGGCCTCGCGTCTGATTAGCTAGTTGGTGAGGTAACGGCCCACCAAGGCGACGATCAGTAGCCGGACTGAGAGGTTGGCCGGCCACATTGGGACTGAGATACGGCCCAG "Bacteria" "Firmicutes" "Clostridia" "Clostridiales" "Ruminococcaceae" "Os…
GATGAACGCCGGCGGTGTGCCTAATACATGCAAGTCGAACGCGTTGGCCCAATTGATTGATGGTGCTTGCACCTGATTGATTTTGGTCGCCAACGAGTGGCGGACGGGTGAGTAACACGTAGGTAACCTGCCCAGAAGCGGGGGACAACATTTGGAAACAGATGCTAATACCGCATAACAGCGTTGTTCGCATGAACAACGCTTAAAAGATGGCTTCTCGCTATCACTTCTGGATGGACCTGCGGTGCATTAGCTTGTTGGTGGGGTAACGGCCTACCAAGGCGATGATGCATAGCCGAGTTGAGAGACTGATCGGCCACAATGGGACTGAGACACGGCCCAT "Bacteria" "Firmicutes" "Bacilli" "Lactobacillales" "La…
GATGAACGCTGGCGGCGTGCTTAACACATGCAAGTCGAACGAAGCACTTAAGAACGATTCTTCGGATGAAGTCTTTTGTGACTGAGTGGCGGACGGGTGAGTAACGCGTGGGTAACCTGCCTCACACAGGGGGATAACAGTTGGAAACGACCGCTAATACCGCATAAGCCAACAGGGGCGCATGCTCTGGTTGGAAAAGATTAATCGGTGTGAGATGGACCCGCGTCTGATTAGCCAGTTGGCAGGGTAACGGCCTACCAAAGCGACGATCAGTAGCCGGCCTGAGAGGGTGAACGGCCACATTGGGACTGAGACACGGCCCAA "Bacteria" "Firmicutes" "Clostridia" "Clostridiales" "Lachnospiraceae" NA …
GATGAACGCTAGCGACAGGCTTAACACATGCAAGTCGAGGGGCAGCGGGGGCGAAAGCTTGCTTTCGCCTGCCGGCGACCGGCGCACGGGTGAGTAACACGTATGGAACCTGCCCTATGCAGGGGGATAAGCGGAAGAAATTCCGTCTAATACCGCATAACACCTTTAGGAGACATCTTCTTGGGGTCAAAGGAGGCGACTCCGGCATAGGATGGCCATGCGTCGCATTAGCTAGTCGGCGGGGTAACGGCCCACCGAGGCGACGATGCGTAGGGGTTCTGAGAGGAAGGTCCCCCACACTGGTACTGAGACACGGACCAG "Bacteria" "Bacteroidetes" "Bacteroidia" "Bacteroidales" "Muribaculaceae" NA …
GATGAACGCTGGCGGCGTGCTTAACACATGCAAGTCGAATGTAGCAATACATGGCGGACGGGTGAGTAACGCGTGAGCAATCTGCCCATGTCTGGGGAATAACAGTTGGAAACGACTGATAATACCGCATAAGACCACAGGAAGGCATCTTCTAGGGGTAAAAGATTTATCGGATATGGATGAGCTCGCGTCTGATTAGCTTGTTGGTGAGGTAACGGCCCACCAAGGCGACGATCAGTAGCCGACCTGAGAGGGTGATCGGCCACATTGGAACTGAGACACGGTCCAA "Bacteria" "Firmicutes" "Clostridia" "Clostridiales" "Clostridiales_vadinBB60_group" NA NA
GATGAACGCTGGCGGCGTGCCTAACACATGCAAGTCGAACGGGTGTACGGGAAGGAAGGCTTCGGCCGGAAAACCTGTGCATGAGTGGCGGACGGGTGAGTAACGCGTGGGCAACCTGGCCTGTACAGGGGGATAACACTTAGAAATAGGTGCTAATACCGCATAACGGGGGAAGCCGCATGGCTTTTCCCTGAAAACTCCGGTGGTACAGGATGGGCCCGCGTCTGATTAGCCAGTTGGCAGGGTAACGGCCTACCAAAGCGACGATCAGTAGCCGGCCTGAGAGGGCGGACGGCCACACTGGGACTGAGACACGGCCCAG "Bacteria" "Firmicutes" "Clostridia" "Clostridiales" "Lachnospiraceae" "Lach…
GACGAACGCTGGCGGCGCGCCTAACACATGCAAGTCGAACGGTGAAGAGGAGCTTGCTCCTCGGATCAGTGGCGGACGGGTGAGTAACACGTGAGCAACCTGCCTTTCAGTGGGGGACAACAGTTGGAAACGACTGCTAATACCGCATAACGTGCCGGAGGGGCATCCTTTTGGTACCAAAGATTTATCGCTGAAAGATGGGCTCGCGTCTGATTAGATAGTTGGTGAGGTAACGGCCCACCAAGTCGACGATCAGTAGCCGGACTGAGAGGTTGATCGGCCACATTGGGACTGAGACACGGCCCAG "Bacteria" "Firmicutes" "Clostridia" "Clostridiales" "Ruminococcaceae" "Ruminiclostridium_6…
GACGAACGCTGGCGGCGTGCTTAACACATGCAAGTCGAACGGAAAGGCCCTGCTTTTGTGGGGTGCTCGAGTGGCGAACGGGTGAGTAACACGTGAGTAACCTGCCCTTGACTTTGGGATAACTTCAGGAAACTGGGGCTAATACCGGATAGGAGCTCCTGCTGCATGGTGGGGGTTGGAAAGTTTCGGCGGTTGGGGATGGACTCGCGGCTTATCAGCTTGTTGGTGGGGTAGTGGCTTACCAAGGCTTTGACGGGTAGCCGGCCTGAGAGGGTGACCGGCCACATTGGGACTGAGATACGGCCCAG "Bacteria" "Actinobacteria" "Actinobacteria" "Propionibacteriales" "Propionibacteriaceae" …
GATGAACGCTGGCGGCGTGCTTAACACATGCAAGTCGAACGGAGATAACATTTTCGAAGCGATTAGTTTACTAAGAGCGGAGATGTTGCTATCTTAGTGGCGGACGGGTGAGTAACGCGTGGGTAACCTGCCTTGCACTGGGGGATAACACTTAGAAATAGGTGCTAATACCGCATAACAGTAGGAGACGCATGTCTTTTACTTGAAAACTCCGGTGGTGTAAGATGGACCCGCGTCTGATTAGCTTGTTGGCGGGGTAACGGCCCACCAAGGCAACGATCAGTAGCCGGCCTGAGAGGGTGAACGGCCACATTGGGACTGAGACACGGCCCAA "Bacteria" "Firmicutes" "Clostridia" "Clostridiales" "Lachnospir…
GATGAACGCTGGCGGCGTGCTTAACACATGCAAGTCGAACGGGAATGCCGCGCTGATGCGATTTCGGTCAAATCATGTGGCATTCGAGTGGCGGACGGGTGAGTAACGCGTGGGTAACCTGCCTTACACAGGGGGATAACACCTGGAAACAGGTGCTAATACCGCATAAGCGCACAGGGCCGCATGGCCCGGTGTGAAAAACTCCGGTGGTGTAAGATGGACCCGCGTCTGATTAGCTAGTTGGCGGGGTAGAGGCCCACCAAGGCGACGATCAGTAGCCGGCCTGAGAGGGTGGACGGCCACATTGGGACTGAGACACGGCCCAA "Bacteria" "Firmicutes" "Clostridia" "Clostridiales" "Lachnospiraceae" "…
GATGAACGCTGGCGGCGTGCCTAACACATGCAAGTCGAACGGAGATATTGCTTGGAAGCTTTTCGGAGTGAAAGAGAACTATCTTAGTGGCGGACGGGTGAGTAACGCGTGGGCAACCTGCCTCATACAGGGGGATAGCATCGGGAAACTGGTGGTAAAACCGCATAAGCGCACGAAGACGCATGTATTCGTGTGAAAAGGAGAAATCTGGTATGAGATGGACCCGCGTCTGATTAGCTAGTTGGAGTGGTAAAAGCACACCAAGGCGACGATCAGTAGCCGGCCTGAGAGGGTGGACGGCCACATTGGGACTGAGACACGGCCCAG "Bacteria" "Firmicutes" "Clostridia" "Clostridiales" "Lachnospiraceae" …
GATGAATGCTGGCGGCGTGCCTAATACATGCAAGTCGAGCGGTAGCAGGGCTTCACCGTGTTCTTGATGCTCCGGGCTGTTTTTATAGCGGGAGTTCATTTCGAGAACGCAGTGAAGCTGCTGACGAGCGGCGGACGGCTGAGTAACGCGTGGGAACATACCCCAAACTGAGGGATAACTACTCGAAAGAGTGGCTAATACCGCATGTGATCTTCGGATTAAAGGATTTATCCGGTTTGGGAATGGCCTGCGTACGATTAGATAGTTGGTGAGGTAAAGGCTCACCAAGTCGACGATCGTTAGATGGTTTGAGAGGATGATCATCCAGACTGGGACTGAGACACGGCCCAG "Bacteria" "Patescibacteria" "Saccharimonadia" …
GATGAACGCTAGCGACAGGCTTAACACATGCAAGTCGAGGGGCAGCGGGTAGATGAGCTTGCTCATTTATGCCGGCAACCGGCGCACGGGTGAGTAACACGTATGCAACCTGCCCGTCTCAGGGGGATAATCGTCGGAAACGGCGTCTAATACCCCGTATGAAGCTGGACGGCATCGTCTGGTTTTGAAAGAATATCGGAGACGGATGGGCATGCGGCGCATTAGCTAGTTGGCGGGGTAACGGCCCACCAAGGCGACGATGCGTAGGGGTTCTGAGAGGAAGGTCCCCCACACTGGTACTGAGACACGGACCAG "Bacteria" "Bacteroidetes" "Bacteroidia" "Bacteroidales" "Muribaculaceae" NA NA
GATGAACGCTGGCGGCGTGCCTAATACATGCAAGTCGAACGCATATCAGTAATGATATGAGTGGCGAACGGGTGAGTAATACATAAGCAACCTGGCCTTTTGAGGGGGATAACTGCTGGAAACGGCAGCTAAGACCGCATAGGTATATCTATTGCATGATAGATATATTAAATATCCCACGGGATAGCGAGAGGATGGGCTTATGACGCATTAGCTAGTTGGTAAGGGTAGCGGCCTACCAAGGCGACGATGCGTAGCCGGCCTGAGAGGGTGAACGGCCACACTGGGACTGAGACACGGCCCAG "Bacteria" "Firmicutes" "Erysipelotrichia" "Erysipelotrichales" "Erysipelotrichaceae" "Candid…
GATGAACGCTGGCGGCGTGCTTAACACATGCAAGTCGAGCGAAAATAATTGGGAGCTTGCTTTTGATTATTTTAGCGGCGGACGGGTGAGTAACGTGTGGGTAACCTGCCTTTTACTGGGGAATAATCACTGGAAACGGTGACTAATACCGCATACGGTTCTTGGAAGGCATCTTCTGAGAAAGAAAGGATTTATTCGGTAAAAGATGGGCCCGCATCTGATTAGCTAGTTGGTGAGATAACAGCCCACCAAGGCGACGATCAGTAGCCGACCTGAGAGGGTGACCGGCCACATTGGGACTGAGACACGGCCCAA "Bacteria" "Firmicutes" "Clostridia" "Clostridiales" "Lachnospiraceae" "ASF356" NA
GATGAACGCTGGCGGCGTGCTTAACACATGCAAGTCGAACGAAGCACTGAAAGCAGATTACTTCGGTTTGAAGCTTTCTTTGACTGAGTGGCGGACGGGTGAGTAACGCGTGGGTAACCTGCCTCATACAGGGGGATAACAGTTAGAAATGACTGCTAATACCGCATAAGCGCACGGTTTCGCATGGAACAGTGTGAAAAACTCCGGTGGTATGGGATGGACCCGCGTCTGATTAGCTGGTTGGCGGGGTAACGGCCCACCAAGGCGACGATCAGTAGCCGGCCTGAGAGGGTGAACGGCCACATTGGGACTGAGACACGGCCCAA "Bacteria" "Firmicutes" "Clostridia" "Clostridiales" "Lachnospiraceae" "…
GATGAACGCTGGCGGCGTGCTTAACACATGCAAGTCGAACGGATGCAAGGGGCTTGCTCCTTGCATTAGTGGCGGACGGGTGAGTAACGCGTGAGCAATCTGCCCATATCAGGGGGATAACAGTTAGAAATGACTGCTAATACCGCATATGACCACGAAAAGGCATCTTTTTGAGGTGAAAGATTTATCGGATATGGATGAGCTCGCGTCCCATTAGGCAGTTGGTGAGGTAACGGCCCACCAAACCTACGATGGGTAGCCGACCTTAGAGGGTGATCGGCCACATTGGAACTGAGACACGGTCCAA "Bacteria" "Firmicutes" "Clostridia" "Clostridiales" "Clostridiales_vadinBB60_group" NA NA
GACGAACGCTGGCGGCGTGCTTAACACATGCAAGTCGAGCGGTATGTAGAAATACATATAGCGGCGGACGGGTGAGTAACGCGTGAGCAATCTGCCTCTGTCATCGGGATAACATTTAGAAATAGGTGCTAATACCGAATAAGACCACGATGCGGCATCGCATTGGGGTAAAAAGGTTACTGGACAGAGATGAGCTCGCGTCCCATTATGGTAGTTGGTGAGGTAACGGCCCACCAAGCCGACGATGGGTAGCCGGCCTGAGAGGGTAAACGGCCACATTGGAACTGAGATACGGTCCAA "Bacteria" "Firmicutes" "Clostridia" "Clostridiales" NA NA NA
GATGAACGCTGGCGGCGTGCCTAACACATGCAAGTCGAACGAAGCATGCCGGAGGAAGTTTTCGGATGGAATCCGGGATGACTGAGTGGCGGACGGGTGAGTAACGCGTGGGTAACCTGCCCTGTACAGGGGGACAACAGTTAGAAATGACTGCTAATACCGCATAAGCGCACAGGACCGCATGGTCCGGTGTGAAAAACTCCGGTGGTACAGGATGGACCCGCGTCTGATTAGGTAGTTGGCGGGGTAACGGCCCACCAAGCCGACGATCAGTAGCCGACCTGAGAGGGTGACCGGCCACATTGGGACTGAGACACGGCCCAA "Bacteria" "Firmicutes" "Clostridia" "Clostridiales" "Lachnospiraceae" "La…
GACGAACGCTGGCGGCGCGCCTAACACATGCAAGTCGAACGGGACTATCTCGGAAGAAGTTTTCGGATGGATTTTGGGATAGTTTAGTGGCGGACGGGTGAGTAACACGTGAGCAACCTGCCTTCGAGAGGGGAATAACGGCTGGAAACGGTCGCTAATACCGCATAACGTACGGATGGGACATCCTGTCTGTACCAAAGATTTATCGCTCGAAGATGGGCTCGCGTCCGATTAGGTAGTTGGTGAGGTAACGGCCCACCAAGCCGACGATCGGTAGCCGGACTGAGAGGTTGAACGGCCACATTGGGACTGAGACACGGCCCAG "Bacteria" "Firmicutes" "Clostridia" "Clostridiales" "Ruminococcaceae" NA…
GATGAACGCTGGCGGCGTGCCTAACACATGCAAGTCGAACGGGCTTAACATGAAACCTAGTGATTGTTAAGTTAGTGGCGGACGGGTGAGTAACGCGTGGATAACCTGCCGTATGCAGGGGGATAACAGTTGGAAACAGCTGCTAATACCGCATAAGCGCACAGTACCGCATGGTACGGTGTGAAAAGATTTATCGGCATACGATGGATCCGCGTCCGATTAGCCAGTTGGCGGGGTAACGGCCCACCAAAGCGACGATCGGTAGCCGGCCTGAGAGGGCGGACGGCCACATTGGGACTGAGACACGGCCCAA "Bacteria" "Firmicutes" "Clostridia" "Clostridiales" "Lachnospiraceae" NA NA
GATGAACGCTGGCGGCGTGCTTAACACATGCAAGTCGAACGGGGTACCCATGACGGAGGCTTCGGCCAACTGAATGGACTACCTAGTGGCGGACGGGTGAGTAACGCGTGAGGAACCTGCCTTGGAGTGGGGAATAACAGCCAGAAATGGCTGCTAATACCGCATAATGCAGTTGGGTCGCATGGCTCTGACTGCCAAAGATTTATCGCTCTAAGATGGCCTCGCGTCTGATTAGTTTGTTGGCGGGGTAACGGCCCACCAAGACGACGATCAGTAGCCGGACTGAGAGGTTGGCCGGCCACATTGGGACTGAGACACGGCCCAG "Bacteria" "Firmicutes" "Clostridia" "Clostridiales" "Ruminococcaceae" "R…
GATGAACGCTGGCGGCGTGCTTAACACATGCAAGTCGAACGGGGGCGGCGGCGATGAAATGATTAGCTTGCTAAGAATGGAAGAGCGGCCGTCCTAGTGGCGGACGGGTGAGTAACGCGTGGGCAACCTGCCCTGTACAGGGGGATAACACTTAGAAATAGGTGCTAATACCGCATGAGCGCACAAAGGCGCATGCCTATGTGCGGGAAGCCCGCGAGGGCGGTACGGGATGGGCCCGCGTCTGATTAGCCAGTTGGCAGGGTAACGGCCTACCAAAGCGACGATCAGTAGCCGGCCTGAGAGGGTGGACGGCCACATTGGGACTGAGACACGGCCCAA "Bacteria" "Firmicutes" "Clostridia" "Clostridiales" "Lachn…
GATGAACGCTGGCGGCGTGCTTAACACATGCAAGTCGAACGGACTCATATTGAAACCTAGTGATGTATGAGTTAGTGGCGGACGGGTGAGTAACGCGTGGAGAACCTGCCGTATACTGGGGGATAACACTTAGAAATAGGTGCTAATACCGCATAAGCGCACAGCTTCGCATGAAGCAGTGTGAAAAACTCCGGTGGTATACGATGGATCCGCGTCTGATTAGCTGGTTGGCGGGGTAAAGGCCCACCAAGGCGACGATCAGTAGCCGGCCTGAGAGGGTGAACGGCCACATTGGGACTGAGACACGGCCCAA "Bacteria" "Firmicutes" "Clostridia" "Clostridiales" "Lachnospiraceae" "Lachnospirace…
GACGAACGCTGGCGGCGTGCCTAACACATGCAAGTCGAACGGACGAGGAGGAGCTTGCTCCTCCGAGTTAGTGGCGGACGGGCGAGTAACGCGTGAGGAACCTGCCCTTGAGTGGGGAATAACGACCGGAAACGGGCGCTAATACCGCATAACATATTGGGATGGCATCGTCCCGATATCAAAGGAGCAATCCGCTGAAGGATGGCCTCGCGTCCGATTAGCTAGTTGGTGGGGTAACGGCCTACCAAGGCGACGATCGGTAGCCGAACTGAGAGGTTGATCGGCCGCATTGGGACTGAGACACGGCCCAG "Bacteria" "Firmicutes" "Clostridia" "Clostridiales" "Ruminococcaceae" NA NA
GACGAACGCTGGCGGCGCGCCTAACACATGCAAGTCGAACGGGACTATGCTGGAAAAAGTTTTCGGACGGATTTCGGCATAGTTTAGTGGCGGACGGGTGAGTAACACGTGAGCAACCTACCTTCTAGAGTGGAATAACGGCTGGAAACGGTCGCTAATACCGCATAACGCATCGGGGGGACATCCCCTTGGTGCCAAAGATTTATCGCTGGGAGATGGGCTCGCGTCCGATTAGGTAGTTGGTGGGGTAACGGCCCACCAAGCCGACGATCGGTAGCCGGACTGAGAGGTTGAACGGCCACATTGGGACTGAGACACGGCCCAG "Bacteria" "Firmicutes" "Clostridia" "Clostridiales" "Ruminococcaceae" NA…
GACGAACGCTGGCGGCGTGCTTAACACATGCAAGTCGAACGGAGCGCCCCTGAAAGAGTTTTCGGACAATGGAAGGGAACGCTTAGTGGCGGACTGGTGAGTAACGCGTGAGGAACCTGCCTTTCGGAGGGGGGACAACAGTTGGAAACGACTGCTAATACCGCATGACACATGACTGTGGCATCGCAGACATGTCAAAGATTTTATCGCCGAAAGATGGCCTCGCGTCTGATTAGCTAGTTGGTGAGGTAATGGCTCACCAAGGCAACGATCAGTAGCCGGACTGAGAGGTTGGCCGGCCACATTGGGACTGAGATACGGCCCAG "Bacteria" "Firmicutes" "Clostridia" "Clostridiales" "Ruminococcaceae" "…
GACGAACGCTGGCGGCACGCCTAACACATGCAAGTCGAACGGACGAGAGGAAGCTTGCTTCCTCAAGTTAGTGGCGGACGGGTGAGTAACACGTGAGCAACCTGCCTCTGAGAGAGGGATAGCTTCTGGAAACGGATGGTAATACCTCATAACATAGTGAAATCGCATGATTTTGTTATCAAAGAAATTCGCTCAGAGATGGGCTCGCGTCTGATTAGATAGTTGGTGAGGTAACGGCTCACCAAGTCGACGATCAGTAGCCGGACTGAGAGGTTGAACGGCCACATTGGGACTGAGACACGGCCCAG "Bacteria" "Firmicutes" "Clostridia" "Clostridiales" "Ruminococcaceae" "Ruminococcus_1" NA
GATGAACGCCGGCGGTGTGCCTAATACATGCAAGTCGAACGCGTTGGCCCAATTGATTGATGGTGCTTGCACCTGATTGATTTTGGTTGCCAGCGAGTGGCGGACGGGTGAGTAACACGTAGGTAACCTGCCCAGAAGCGGGGGACAACATTTGGAAACAGATGCTAATACCGCATAACAACGTTGTTCGCATGAACAACGCTTAAAAGATGGCTTCTCGCTATCACTTCTGGATGGACCTGCGGTGCATTAGCTTGTTGGTGGGGTAACGGCCTACCAAGGCGATGATGCATAGCCGAGTTGAGAGACTGATCGGCCACAATGGGACTGAGACACGGCCCAT "Bacteria" "Firmicutes" "Bacilli" "Lactobacillales" "La…
GACAAACGCTGGCGGCGTGCCTAACACATGCAAGTCGAACGAAGCACTGGAGAAAGAGACTTCGGTCAATGACTCCTTTGACTTAGTGGCGGACGGGTGAGTAATGCGTGAGCAACCTGCCTTGGAGAGGGGGACAACAGCTGGAAACGGCTGCTAATACCGCATGAAGTTACTGGGGGGCATCCTTTGGTAACCAAAGATTTATCGCTCTGAGATGGGCTCACGTCTGATTAGTTAGTTGGTAGGGTAACGGCCTACCAAGACCGCGATCAGTAGCCGGACTGAGAGGTTGAACGGCCACATTGGGACTGAGATACGGCCCAG "Bacteria" "Firmicutes" "Clostridia" "Clostridiales" "Ruminococcaceae" "Ru…
GATGAACGCTAGCGACAGGCTTAACACATGCAAGTCGAGGGGCAGCGGGGCGGCAGGCTTGCCTGCCGTTGCCGGCGACCGGCGCACGGGTGAGTAACACGTATGCAACCTGCCCGTGGCAGGGGGATAAGCGGGGGAAACCCCGTCTAATACCGCGTAACGCGGCCTAGGGACATCCCAAGGCCGCCAAAGGGAGCAATCCCGGCCACGGATGGGCATGCGGCGCATTAGCTAGTCGGCGGGGTAACGGCCCACCGAGGCGACGATGCGTAGGGGTTCTGAGAGGAAGGCCCCCCACACTGGTACTGAGACACGGACCAG "Bacteria" "Bacteroidetes" "Bacteroidia" "Bacteroidales" "Muribaculaceae" NA …
GATGAACGCTGGCGGCGTGCCTAACACATGCAAGTCGAACGAAGCGCATGCCTGGAACCCTCCGGGGGGAAGGGCATATGACTGAGTGGCGGACGGGTGAGTAACGCGTGGGCAACCTGCCCCGCACTGGGGGACAACAGCCGGAAACGGCTGCTAATACCGCATATGCGCACAGCTTTGCATGAAGCAGTGTGGAAAACTCCGGTGGTGCGGGATGGGCCCGCGTCTGATTAGCTGGTTGGCGGGGCAACGGCCCACCAAGGCGACGATCAGTAGCCGGCCTGAGAGGGTGGACGGCCACATTGGGACTGAGACACGGCCCAG "Bacteria" "Firmicutes" "Clostridia" "Clostridiales" "Lachnospiraceae" "A2…
AGTGAACGCTGGCGGCAGGCCTAACACATGCAAGTCGAACGGCAGCACAGTAAGAGCTTGCTCTTATGGGTGGCGAGTGGCGGACGGGTGAGGAATACATCGGAATCTACTCTTTCGTGGGGGATAACGTAGGGAAACTTACGCTAATACCGCATACGACCTACGGGTGAAAGCGGAGGACCTTCGGGCTTCGCGCGATTGAATGAGCCGATGTCGGATTAGCTAGTTGGCGGGGTAAAGGCCCACCAAGGCGACGATCCGTAGCTGGTCTGAGAGGATGATCAGCCACACTGGAACTGAGACACGGTCCAG "Bacteria" "Proteobacteria" "Gammaproteobacteria" "Xanthomonadales" "Xanthomonadaceae"…
AGCGAACGCTGGCGGCAGGCCTAACACATGCAAGTCGAACGAACTCTTCGGAGTTAGTGGCGGACGGGTGAGTAACACGTGGGAACGTGCCTTTAGGTTCGGAATAACTCAGGGAAACTTGTGCTAATACCGAATGTGCCCTTCGGGGGAAAGATTTATCGCCTTTAGAGCGGCCCGCGTCTGATTAGCTAGTTGGTGAGGTAAAGGCTCACCAAGGCGACGATCAGTAGCTGGTCTGAGAGGATGATCAGCCACATTGGGACTGAGACACGGCCCAA "Bacteria" "Proteobacteria" "Alphaproteobacteria" "Caulobacterales" "Caulobacteraceae" "Brevundimonas" NA
GACGAACGCTGGCGGCGCGCCTAACACATGCAAGTCGAACGGAGCTATTTCTCTTGAAGTTTTCGGATGGAAAGAGGCTTAGCTTAGTGGCGAACGGGTGAGTAACACGTGAGCAACCTGCCTTTCAGAGGGGGACAACGTTTGGAAACGAACGCTAATACCGCATAAGACCACAGTGCCGCATGACACAGGGGTCAAAGGAGCAATCCGCTGAAAGATGGGCTCGCGTCCGATTAGATAGTTGGTGGGGTAACGGCCTACCAAGTCGACGATCGGTAGCCGGACTGAGAGGTTGAACGGCCACATTGGGACTGAGACACGGCCCAG "Bacteria" "Firmicutes" "Clostridia" "Clostridiales" "Ruminococcaceae" …
GACGAACGCTGGCGGCGTGCTTAACACATGCAAGTCGAACGGAGCGCCTGTGAAAGAGACTTCGGTCAATGGATTGGGATGCTTAGTGGCGGACGGGTGAGTAACGCGTGAGGAACCTGCCTTTCAGTGGGGGACAACAGTTGGAAACGACTGCTAATACCGCATAACATATCTGCATCGCATGGTGTGGATATCAAAGATTTATCGCTGAGAGATGGCCTCGCGTCTGATTAGCTAGTTGGTGGGGTAACGGCCCACCAAGGCGACGATCAGTAGCCGGACTGAGAGGTTGGCCGGCCACATTGGGACTGAGATACGGCCCAG "Bacteria" "Firmicutes" "Clostridia" "Clostridiales" "Ruminococcaceae" "Ru…
GATGAACGCTGGCGGCGTGCTTAACACATGCAAGTCGAACGGGGATGCCATTTTTGAAGCGATTAGCTTGCTAAGAGTGGAAATGTTGGCATCTTAGTGGCGGACGGGTGAGTAACGCGTGGGGAACCTGCCCTGTACAGGGGGATAACACTTAGAAATAGGTGCTAATACCGCATAAGCGCACAGTGTCGCATGATACAGTGTGAAAAACTCCGGTGGTACAGGATGGACCCGCGTCTGATTAGCTGGTTGGCGGGGTAACGGCCCACCAAGGCGACGATCAGTAGCCGGCCTGAGAGGGTGAACGGCCACATTGGGACTGAGACACGGCCCAA "Bacteria" "Firmicutes" "Clostridia" "Clostridiales" "Lachnospi…
GATGAACGCTGGCGGCGTGCCTAACACATGCAAGTCGAACGGGCCGCGCCTGAAACCTAGTGAAGGCGCGGCCAGTGGCGGACGGGTGAGTAACGCGTGGGCAACCTGCCGCGCACAGGGGGACAACGGCCGGAAACGGCCGCTAATACCGCATAGTCCCGCGGGGCCGCATGGCCCTGCGGGGAAAGCCCGGGGCGACCCGGACGGTGCGCGATGGGCCCGCGTCCGATTAGCTGGTTGGCGGGGCAGCGGCCCACCAAGGCGACGATCGGTAGCCGGCCTGAGAGGGCGGACGGCCACACTGGGACTGAGACACGGCCCAG "Bacteria" "Firmicutes" NA NA NA NA NA
GATGAACGCTGGCGGCGTGCCTAACACATGCAAGTCGAGCGGAAGCGTTACGAAGGAAGTTTTCGGATGGAATTGGTAACGGTTTAGCGGCGGACGGGTGAGTAACACGTGGGCAACCTGCCTTATACTGGGGGATAACAGTTAGAAATGACTGCTAATACCGCATAAGCGCCCATCCCCGCATGGGGAAGAGCGAAAAACTCCGGTGGTATAAGATGGGCCCGCGCCTGATTAGGTAGTTGGTGGGGTAACGGCCTACCAAGCCGACGATCAGTAGCCGACCTGAGAGGGTGGCCGGCCACATTGGGACTGAGACACGGCCCAA "Bacteria" "Firmicutes" "Clostridia" "Clostridiales" "Lachnospiraceae" NA…
GATGAACGCTAGCGGCAGGCTTAACACATGCAAGTCGAGGGGCAGCGAGGTTGTAGCAATACGACTGTCGGCGACCGGCGCACGGGTGCGTAACGCGTATGCAACCTACCCGTAACAGGGGGATAACACTGAGAAATTGGTACTAATACCCCATAACATCATGAAAGGCATCTTTCGTGGTTGAAAACTCTGGTGGTTACGGATGGGCATGCGTTGTATTAGCTGGTTGGTGAGGTAACGGCTCACCAAGGCGACGATACATAGGGGGACTGAGAGGTTAACCCCCCACATTGGTACTGAGACACGGACCAA "Bacteria" "Bacteroidetes" "Bacteroidia" "Bacteroidales" "Rikenellaceae" "Alistipes" NA
GATGAACGCTGGCGGCGTGCCTAATACATGCAAGTCGAACGAAACTTCTTTATCACCGAGTGCTTGCACTCACCGGTAAAGGGTTGAGTGGCGAACGGGTGAGTAACACGTGGGCAACCTGCCCAAAAGAGGGGGATAACACTTGGAAACAGGTGCTAATACCGCATAACCATAGTTACCGCATGGTAGCTATGTAAAAGGTGGCTATGCTACCGCTTTTGGATGGGCCCGCGGCGCATTAGCTAGTTGGTGGGGTAAAGGCTTACCAAGGCAATGATGCGTAGCCGAACTGAGAGGTTGATCGGCCACATTGGGACTGAGACACGGCCCAA "Bacteria" "Firmicutes" "Bacilli" "Lactobacillales" "Lactobacillac…
GATGAACGCTGGCGGCGTGCTTAACACATGCAAGTCGAACGAAGCGATTTAGCGGAAGTTTTCGGATGGAAGCCAAATTGACTGAGTGGCGGACGGGTGAGTAACGCGTGGGTAACCTGCCTCATACAGGGGGATAACAGTTAGAAATGACTGCTAATACCGCATAAGCGCACGAGGATGCATGTTCTTGTGTGAAAAACTCCGGTGGTATGAGATGGACCCGCGTCTGATTAGCTAGTTGGAGGGGTAACGGCCCACCAAGGCGACGATCAGTAGCCGACCTGAGAGGGTGACCGGCCACATTGGGACTGAGACACGGCCCAA "Bacteria" "Firmicutes" "Clostridia" "Clostridiales" "Lachnospiraceae" NA …
GATGAACGCTAGCGACAGGCTTAACACATGCAAGTCGAGGGGCAGCGGGGGCGAAAGCTTGCTTTCGTCTGCCGGCGACCGGCGCACGGGTGAGTAACACGTATGGAACCTGCCCTATGCAGGGGGATAAGCGGAAGAAATTCCGTCTAATACCGCATAACACCATTTGGAGACATCTCCAGGTGGTCAAAGGAGGCGACTCCGGCATAGGATGGCCATGCGTCGCATTAGCTAGTCGGCGGGGTAACGGCCCACCGAGGCGACGATGCGTAGGGGTTCTGAGAGGAAGGTCCCCCACACTGGTACTGAGACACGGACCAG "Bacteria" "Bacteroidetes" "Bacteroidia" "Bacteroidales" "Muribaculaceae" NA …
GATGAACGCTGGCGGCGTGCTTAACACATGCAAGTCGAACGGAGCACCCCTGATCGAGTTTTCGGACAAGTGAAGGGAATGCTTAGTGGCGGACGGGTGAGTAACGCGTGAGGAACCTGCCTTGGAGAGGGGAATAACACAGTGAAAATTGTGCTAATACCGCATGAAGCAGTTGAGTCGCATGGCTCTGACTGCCAAAGATTTATCGCTCTGAGATGGCCTCGCGTCTGATTAGCTAGTTGGTGGGGCAACGGCCCACCAAGGCGACGATCAGTAGCCGGACTGAGAGGTTGACCGGCCACATTGGGACTGAGACACGGCCCAG "Bacteria" "Firmicutes" "Clostridia" "Clostridiales" "Ruminococcaceae" NA…
GATGAACGCTGGCGGCGTGCTTAACACATGCAAGTCGAACGAAGATATTAAGAATGAGAGCTTCGGCAGGAATTTTTCTTATCTTAGTGGCGGACGGGTGAGTAACGTGTGGGCAACCTGCCCTGCACTGGGGAATAATCATTGGAAACGATGACTAATACCGCATACGGTTCCTGGGAGGCATCTTCCGGGAAAGAAAGGATTTATTCGGTGCAGGATGGGCCCGCATCTGATTAGCTAGTTGGTGAGATAACAGCCCACCAAGGCGACGATCAGTAGCCGACCTGAGAGGGTGACCGGCCACATTGGGACTGAGACACGGCCCAA "Bacteria" "Firmicutes" "Clostridia" "Clostridiales" "Lachnospiraceae" …
GACGAACGCTGGCGGCGTGCTTAACACATGCAAGTCGAACGGAGTGCCTCGGAAAGAGATTTCGGTCAATGGAAGAGGATACTTAGTGGCGGACGGGTGAGTAACGCGTGAGGAACCTACCTCTCAGAGGGGGACAACAGTTGGAAACGACTGCTAATACCGCATAATATATCTGTATCGCATGGTATGGATATCAAAGATTTATCGCTGAGAGATGGCCTCGCGTCTGATTAGCTAGTTGGCAGGGTAACGGCCTACCAAGGCAACGATCAGTAGCCGGACTGAGAGGTTGGCCGGCCACATTGGGACTGAGATACGGCCCAG "Bacteria" "Firmicutes" "Clostridia" "Clostridiales" "Ruminococcaceae" "Ru…
GATGAACGCTGGCGGCGTGCCTAACACATGCAAGTCGAACGGGCTCGGATTGAAACCTAGTGATTTCCGAGTTAGTGGCGGACGGGTGAGTAACGCGTGGATAACCTGCCGTATGCAGGGGGATAACAGTTGGAAACAGCTGCTAATACCGCATAAGCGCACAGTACCGCATGGTACGGTGTGAAAAGATTTATCGGCATACGATGGATCCGCGTCCGATTAGCCAGTTGGCGGGGTAACGGCCCACCAAAGCGACGATCGGTAGCCGGCCTGAGAGGGCGGACGGCCACATTGGGACTGAGACACGGCCCAA "Bacteria" "Firmicutes" "Clostridia" "Clostridiales" "Lachnospiraceae" NA NA
GATGAACGCCGGCGGTGTGCCTAATACATGCAAGTCGTACGCACTGGCCCAACTGATTGATGGTGCTTGCACCTGATTGACGTTGGATCACCAGTGAGTGGCGGACGGGTGAGTAACACGTAGGTAACCTGCCCCGGAGCGGGGGATAACATTTGGAAACAGATGCTAATACCGCATAACAACAAAAGCCACATGGCTTTTGTTTGAAAGATGGCTTTAGCTATCACTCTGGGATGGACCTGCGGTGCATTAGCTAGTTGGTAAGGTAACGGCTTACCAAGGCGATGATGCATAGCCGAGTTGAGAGACTGATCGGCCACAATGGAACTGAGACACGGTCCAT "Bacteria" "Firmicutes" "Bacilli" "Lactobacillales" "La…
GATGAACGCTGGCGGCGTGCTTAACACATGCAAGTCGAACGGACATATACCGAAACCTAGTGAAGTATATGTTAGTGGCGGACGGGTGAGTAACGCGTGGATAACCTGCCGTGCACAGGGGGATAACACTTAGAAATAGGTGCTAATACCGCATAAGCGCACAGTTTCGCATGAGACGGTGTGAAAAGCCTGGAAGCGATTCCTGGCGGTGCATGATGGATCCGCGTCCGATTAGCTAGTTGGCGGGGTAAAGGCCCACCAAGGCAGCGATCGGTAGCCGGCCTGAGAGGGTGGACGGCCACATTGGGACTGAGACACGGCCCAA "Bacteria" "Firmicutes" "Clostridia" "Clostridiales" "Lachnospiraceae" "L…
GACGAACGCTGGCGGCGCGCCTAACACATGCAAGTCGAACGGGGCTTATATTTCAGAAGTTTTCGGATGGACGAGAGATAAGCTTAGTGGCGGACGGGTGAGTAACACGTGAGCAACCTGCCTTTCAGAGGGGGATAACAGTTGGAAACGACTGCTAATACCGCATAACGCTGCGATGGGGCATCCCGATGCAGCCAAAGGAGCAATCCGCTGGAAGATGGGCTCGCGGCCGATTAGCTAGTTGGTGGGGTAACGGCCCACCAAGGCGACGATCGGTAGCCGGACTGAGAGGTTGATCGGCCACATTGGGACTGAGACACGGCCCAG "Bacteria" "Firmicutes" "Clostridia" "Clostridiales" "Ruminococcaceae" …
AACGAACGCTGGCGGCAGGTCTTAGGCATGCAAGTCGAACGGGTGAAGCAGAGCTTGCTCTGTGGATCTAGTGGCGCACGAGTGAGTAACGCGTGGGAAACTGCCCACCACTGGGGAATAACGTTTGGAAACGAACGCTAATACCGCATACGCCGGAAACGGGAAAGATTTATCGGTGGTGGATGTGCCCGCGTTGGATTAGCTTGTTGGTGGGGTAACGGCCTACCAAGGCGATGATCCATAGCTGGTCTGAGAGGACGATCAGCCACGCTGGAACTGAGACACGGTCCAG "Bacteria" "Proteobacteria" "Alphaproteobacteria" "Rhodospirillales" NA NA NA
GATGAACGCTGGCGGCGTGCTTAACACATGCAAGTCGAACGGGGTACCCTTAACAGAGGATTCGTCCAATGGAGAGGAATACCTAGTGGCGGACGGGTGAGTAACGCGTGAGGAACCTGCCTTGGAGAGGGGAATAACACAGGGAAACCTGTGCTAATACCGCATAATGCAGTTGGGCCGCATGGCTCTGACTGCCAAAGATTTATCGCTCTGAGATGGCCTCGCGTCTGATTAGGTAGTTGGCGGGGTAACGGCCCACCAAGCCGACGATCAGTAGCCGGACTGAGAGGTTGGCCGGCCACATTGGGACTGAGACACGGCCCAG "Bacteria" "Firmicutes" "Clostridia" "Clostridiales" "Ruminococcaceae" "R…
GACGAACGCTGGCGGCGTGCTTAACACATGCAAGTCGAGCGGAATATGGGGGCTTGCTCCCATATTTAGCGGCGGACGGGTGAGTAACGCGTGAGCAACCTGCCTTAAACTGCGGGATAACACTTAGAAATAGGTGCTAATACCGCATAAGACCACACTTCGGCATCGGAGAGGGGTAAAAGATTTATCGGTTTAAGATGGGCTCGCGTCCCATTAGTTAGTTGGTGAGGTAACGGCCCACCAAGACTGTGATGGGTAGCCGACCTGAGAGGGTGATCGGCCACATTGGAACTGAGAAACGGTCCAA "Bacteria" "Firmicutes" "Clostridia" "Clostridiales" "Clostridiales_vadinBB60_group" NA NA
GATGAACGCTGGCGGCGTGCCTAACACATGCAAGTCGAACGGAGATATTGCTTGGAAGCTTTTCGGAGTGAAAGAGAAGTATCTTAGTGGCGGACGGGTGAGTAACGCGTGGGCAACCTGCCTCATACAGGGGGATAGCATCGGGAAACTGGTGGTAAAACCGCATAAGCGCACGAAGACGCATGTATTCGTGTGAAAAGGAGAAATCTGGTATGAGATGGACCCGCGTCTGATTAGCTAGTTGGAGTGGTAAAAGCACACCAAGGCGACGATCAGTAGCCGGCCTGAGAGGGTGGACGGCCACATTGGGACTGAGACACGGCCCAG "Bacteria" "Firmicutes" "Clostridia" "Clostridiales" "Lachnospiraceae" …
GATAAACGCTGGCGGCGCACATAAGACATGCAAGTCGAACGAACTTAACCTTTAGTTTACTAATGGAGCGGTTAGTGGCGGACTGGTGAGTAACGCGTAAGAAATCTGCCTATAAGAGGGGAATAACAGTGAGAAATCATTGCTAATACCGCATAAGCTCTGAGAATCGCATGATACAAAGAGAAAAGGAGTAATCCGCTTATAGATGATCTTGCGTCTGATTAGTTAGTTGGTGAGGTAAAGGCCCACCAAGACGATGATCAGTAGCCGGACTGAGAGGTTGAACGGCCACATTGGGACTGAGATACGGCCCAG "Bacteria" "Firmicutes" "Clostridia" "Clostridiales" "Ruminococcaceae" "Ruminococca…
GATGAACGCTGGCGGCGTGCTTAACACATGCAAGTCGAACGGAGATATCATTTTCGAAGCGATTAGTTTACTAAGAGTGGAGATGTTGGTATCTTAGTGGCGGACGGGTGAGTAACGCGTGGGTAACCTGCCTTACACTGGGGGATAACACTTAGAAATAGGTGCTAATACCGCATAACAGGGAAAGATGCATGTCTTTTCCTTAAAAACTCCGGTGGTGTAAGATGGACCCGCGTCTGATTAGCTTGTTGGCGGGGTAACGGCCCACCAAGGCGACGATCAGTAGCCGGCCTGAGAGGGTGAACGGCCACATTGGGACTGAGACACGGCCCAA "Bacteria" "Firmicutes" "Clostridia" "Clostridiales" "Lachnospir…
GATGAACGCTGGCGGCATGCCTAATACATGCAAGTCGAACGGACGGAAAGGAAGCTTGCTTTCTGGAAGTCAGTGGCGAACGGGTGAGTAACACGTAGGTAACCTGGCCATCACAGGGGGATAACTACTGGAAACGGTAGCTAAAACCGCATAGGTAAGGAAGAGGCATCTCTTGCTTATTAAAGGGGCTACGGCCTTGGTGATGGATGGACCTGCGGCGCATTAGCTAGTTGGTGAGGTAGAGGCTCACCAAGGCGATGATGCGTAGCCGACCTGAGAGGGTGAACGGCCACATTGGGACTGAGACACGGCCCAA "Bacteria" "Firmicutes" "Erysipelotrichia" "Erysipelotrichales" "Erysipelotrichace…
GACGAACGCTGGCGGCGCGCCTAACACATGCAAGTCGAACGGGACTATTTTGGGAGAAGTTTTCGGATGGATCTCGGGATAGTTTAGTGGCGGACGGGTGAGTAACACGTGAGCAACCTACCTTCGAGAGGGGAATAACGGCTGGAAACGGTCGCTAATACCGCATAACATACTGGAGGGACATCCCTTTGGTATCAAAGATTATATCGCTCGGAGATGGGCTCGCGTCCGATTAGGTAGTTGGTGAGGTAACGGCTCACCAAGCCGACGATCGGTAGCCGGACTGAGAGGTCGAACGGCCACATTGGGACTGAGACACGGCCCAG "Bacteria" "Firmicutes" "Clostridia" "Clostridiales" "Ruminococcaceae" N…
GACGAACGCTGGCGGCGTGCTTAACACATGCAAGTCGAACGGAGCACCCCTGAAAGAGTTTTCGGACAATGGAAGGGAATGCTTAGTGGCGGACTGGTGAGTAACGCGTGAGGAACCTGCCTTCCAGAGGGGGACAACAGTTGGAAACGACTGCTAATACCGCATGATGTGTTTCGATGGCATCATCGAGACACCAAAGATTTATCGCTGGAAGATGGCCTCGCGTCTGATTAGCTGGTAGGCGGGGTAACGGCCCACCTAGGCGACGATCAGTAGCCGGACTGAGAGGTTGACCGGCCACATTGGGACTGAGATACGGCCCAG "Bacteria" "Firmicutes" "Clostridia" "Clostridiales" "Ruminococcaceae" "Os…
GATGAACGCTGGCGGCGTGCTTAACACATGCAAGTCGAACGAAGCAGGAGGGTGCTTGCACCTTCCTGACTGAGTGGCGGACGGGTGAGTAACACGTGGATAATCTGCCCTGCACAGGGGGACAACAGCTAGAAATGGCTGCTAATACCGCATAAGCCTACAGCCTCGCATGAGGGAGTAGGAAAAGAAATTCGGTGCAGGATGAGTCCGCGTCTGATTAGCTAGTTGGAGGGGTAAAAGCCCACCAAGGCAACGATCAGTAGCCGGCCTGAGAGGGCGACCGGCCACATTGGGACTGAGACACGGCCCAA "Bacteria" "Firmicutes" "Clostridia" "Clostridiales" "Lachnospiraceae" NA NA
GACGAACGCTGGCGGCGTGCTTAACACATGCAAGTCGAGCGAACGTAGCAATACGTTAGCGGCGGACGGGTGAGTAACGCGTGAGCAATCTGCCTCTATCAGCGGGATAACACTTAGAAATAGGTGCTAATACCGCATAAGACCACGAAGTCGCATGACTTTGGGGTAAAAGCTCCGGCGGATAGAGATGAGCTCGCGTCCTATTAGCTAGTTGGTGGGGTAACGGCCTACCAAGGCGACGATAGGTAGCCGACCTGAGAGGGTGATCGGCCACATTGGAACTGAGAAACGGTCCAA "Bacteria" "Firmicutes" "Clostridia" "Clostridiales" "Clostridiales_vadinBB60_group" NA NA
GATGAACGCTGGCGGCGTGCTTAACACATGCAAGTCGAGCGAAGCATAAGAGAGGAAGTTTTTAATGGAATCTATTGTGACTGAGCGGCGGACGGGTGAGTAACGCGTGGGTAACCTGCCCTATACAGGGGGATAACAGTTAGAAATGACTGCTAATACCGCATAAGCGCACGGAGCCGCATGGCGCTGTGTGAAAAACGATAGTGGTATAGGAGGGACCCGCGTCTGATTAGGTAGTTGGTGGGGTAACGGCCCACCAAGCCGACGATCAGTAGCCGACCTGAGAGGGTGACCGGCCACATTGGGACTGAGACACGGCCCAA "Bacteria" "Firmicutes" "Clostridia" "Clostridiales" "Lachnospiraceae" NA NA
GATGAACGCTGGCGGCGTGCCTAACACATGCAAGTCGAACGGGGCCTGCGCAGCGGAACCCTCCGGGGGGAAGCAGCGCAGTGCCCAGTGGCGGACGGGTGAGTAACGCGTGGGTAACCTGCCCTGTACAGGGGGACAACAGCCGGAAACGGCTGCTAATACCGCATAAGCCCGCGGCGCCGCATGGCGCTGCGGGGAAAACTCCGGTGGTACAGGATGGGCCCGCGTCTGATTAGCTAGTTGGCGGGGTAACGGCCCACCAAGGCAGCGATCAGTAGCCGGCTTGAGAGAGTGGACGGCCACATTGGGACTGAGACACGGCCCAG "Bacteria" "Firmicutes" "Clostridia" "Clostridiales" "Lachnospiraceae" "…
GATGAACGCTGGCGGCGTGCTTAACACATGCAAGTCGAGCGAAGCGATAAGGTGAAATTTTTCGGAATGAAGCCATATTGACTTAGCGGCGGACGGGTGAGTAACGCGTGGGTAACCTGCCTCATACAGGGGGATAACAGTTAGAAATGACTGCTAATACCGCATAAGCGCACGGGACTGCATGGTCCAGTGTGAAAAACCGAGGTGGTATGAGATGGACCCGCGTCTGATTAGCTGGTTGGCGGGGTAACGGCCCACCAAGGCGACGATCAGTAGCCGACCTGAGAGGGTGGCCGGCCACATTGGGACTGAGACACGGCCCAA "Bacteria" "Firmicutes" "Clostridia" "Clostridiales" "Lachnospiraceae" NA …
GATGAACGCTGGCGGCGTGCCTAATACATGCAAGTCGAACGAAACTTCTTTATCACCGAGTGCTTGCACTCACCGATAAAGAGTTGAGTGGCGAACGGGTGAGTAACACGTGGGCAACCTGCCCAAAAGAGGGGGATAACACTTGGAAACAGGTGCTAATACCGCATAACCATAGTTACCGCATGGTAACTATGTAAAAGGTGGCTATGCTACCGCTTTTGGATGGGCCCGCGACGCATTAGCTAGTTGGTGGGGTAAAGGCTTACCAAGGCAATGATGCGTAGCCGAACTGAGAGGTTGATCGGCCACATTGGGACTGAGACACGGCCCAA "Bacteria" "Firmicutes" "Bacilli" "Lactobacillales" "Lactobacillac…
GATGAACGCTGGCGGCGTGCTTAACACATGCAAGTCGAACGGGGTTATCATTTTTGAAGCGATTAGCTTGCTAAGAGTGGAAAAGTTGATAACTTAGTGGCGGACGGGTGAGTAACGCGTGGGTAACCTGCCTTACACAGGGGGATAACACTTAGAAATAGGTGCTAATACCGCATAAGCGCACAGTCCCGCATGGGACAGAGTGAAAAACATTAGTGGTGTAAGATGGACCCGCGTCTGATTAGCTTGTTGGCGGGGTAACGGCCCACCAAGGCGACGATCAGTAGCCGGCCTGAGAGGGTGGACGGCCACATTGGGACTGAGACACGGCCCAA "Bacteria" "Firmicutes" "Clostridia" "Clostridiales" "Lachnospi…
GATGAACGCTAGCGACAGGCTTAACACATGCAAGTCGAGGGGCAGCGGGTAGATGAGCTTGCTCATTTATGCCGGCGACCGGCGCACGGGTGAGTAACACGTATGCAACCTGCCCGTCTCAGGGGGATAATCGTCGGAAACGGCGTCTAATACCCCGTATGAAGTTGGACGGCATCGTCTGGTTTTGAAAGAATATCGGAGACGGATGGGCATGCGGCGCATTAGCTGGTTGGCGGGGTAACGGCCCACCAAGGCGACGATGCGTAGGGGTTCTGAGAGGAAGGTCCCCCACACTGGTACTGAGACACGGACCAG "Bacteria" "Bacteroidetes" "Bacteroidia" "Bacteroidales" "Muribaculaceae" NA NA
GATGAACGCTGGCGGCGTGCTTAACACATGCAAGTCGAACGAAGCGGTTGAGAGGAAGTTTTCGGATGGAATTTCAATTGACTGAGTGGCGGACGGGTGAGTAACGCGTGGGTAACCTGCCTCATACAGGGGGATAACAGTTAGAAATGACTGCTAATACCGCATAAGCGCACGAGATCGCATGATAAAGTGTGAAAAACTCCGGTGGTATGAGATGGACCCGCGTCTGATTAGCTGGTTGGTGGGGTAACGGCCCACCAAGGCGACGATCAGTAGCCGACCTGAGAGGGTGACCGGCCACATTGGGACTGAGACACGGCCCAA "Bacteria" "Firmicutes" "Clostridia" "Clostridiales" "Lachnospiraceae" NA …
GATGAACGCTGGCGGCGTGCCTAACACATGCAAGTCGAACGGAGATATTGCTTGGAAGCTTTTCGAGGTGAAAGAGAACTATCTTAGTGGCGGACGGGTGAGTAACGCGTGGGCAACCTGCCTCATACAGGGGGATAGCATCGGGAAACTGGTGGTAAAACCGCATAAGCGCACGAAGACGCATGTATTCGTGTGAAAAGGAGAAATCTGGTATGAGATGGACCCGCGTCTGATTAGCTAGTTGGAGTGGTAAAAGCACACCAAGGCGACGATCAGTAGCCGGCCTGAGAGGGTGGACGGCCACATTGGGACTGAGACACGGCCCAG "Bacteria" "Firmicutes" "Clostridia" "Clostridiales" "Lachnospiraceae" …
GATGAACGCTGGCGGCGTGCCTAACACATGCAAGTCGAGCGAAGCGCTTGAATTAGATTCTTCGGATGAAGATTTTTGCGACTGAGCGGCGGACGGGTGAGTAACGCGTGGGTAACCTGCCTTACACAGGGGGATAACAGTTAGAAATGACTGCTAATACCGCATAAGACCACAGTACCGCATGGTATAGTGGTAAAAACCGAGGTGGTGTAAGATGGACCCGCGTCTGATTAGGTAGTTGGTGGGGTAACGGCCCACCAAGCCGACGATCAGTAGCCGGCCTGAGAGGGTGGACGGCCACATTGGGACTGAGACACGGCCCAG "Bacteria" "Firmicutes" "Clostridia" "Clostridiales" "Lachnospiraceae" "La…
GATGAACGCTGGCGGCGTGCTTAACACATGCAAGTCGAACGGGGATGCTGACGGAAGGGGTGCTTGCACTCTGGAAGTAAGGATCTTAGTGGCGGACGGGTGAGTAACGCGTGGGTAACCTGCCCCATACCGGGGGATACCACCTGGAAACAGGTGCTAATACCGCATAAGCGCACGGGAGCGCATGCTCCTGTGTGAAAAACTCCGGTGGTATGGGATGGACCCGCGTCTGATTAGCCAGTTGGCAGGGTAACGGCCTACCAAAGCGACGATCAGTAGCCGGCCTGAGAGGGTGGACGGCCACATTGGGACTGAGACACGGCCCAA "Bacteria" "Firmicutes" "Clostridia" "Clostridiales" "Lachnospiraceae" …
GATGAACGCTGGCGGCGTGCCTAACACATGCAAGTCGAACGGACTTAATATGAAACCTAGTGATTGTTAAGTTAGTGGCGGACGGGTGAGTAACGCGTGGATAACCTGCCGTATGCAGGGGGATAACAGTTGGAAACAGCTGCTAATACCGCATAAGCGCACGGTGCCGCATGGTACAGTGCGAAAAGATTTATCGGCATACGATGGATCCGCGTCCGATTAGCCAGTTGGCGGGGTAACGGCCCACCAAAGCGACGATCGGTAGCCGGCCTGAGAGGGCGGACGGCCACATTGGGACTGAGACACGGCCCAA "Bacteria" "Firmicutes" "Clostridia" "Clostridiales" "Lachnospiraceae" "Lachnospirace…
GATGAACGCTGGCGGCGTGCTTAACACATGCAAGTCGAACGAAGCACCTGAGAATGATTCTTCGGATGAAGTCTCTTGTGACTGAGTGGCGGACGGGTGAGTAACGCGTGGGTAACCTGCCTCACACAGGGGGATAACAGTTGGAAACGACCGCTAATACCGCATAACCCGCTGGTGCCGCATGGCACTGACGGAAAAGATTTATCGGTGTGAGATGGACCCGCGTCTGATTAGCCAGTTGGCAGGGTAACGGCCTACCAAAGCGACGATCAGTAGCCGGCCTGAGAGGGTGAACGGCCACATTGGGACTGAGACACGGCCCAG "Bacteria" "Firmicutes" "Clostridia" "Clostridiales" "Lachnospiraceae" NA …
GACGAACGCTGGCGGCGTGCTTCATACATGCAAGTCGAACGAGAAGCTTACTTCGGTAAGTGGAAAGTGGCGGACGGGTGAGTAATGTGTAGAGAATCTGCCCTGTACTGGGGGACAACAGAGGGAAACTTCTGCTAATACCCCATATGAGCGTACCTGCGATGGTATTCTTGAAAGTTCCGGCGGTACAGGATGAGTCTGCATCTGATTAGCTAGTTGGTGGTGTAATGGACTACCAAGGCGACGATCAGTAGCTGGTTTGAGAGGATGATCAGCCACAATGGGACTGAGACACGGCCCAT "Bacteria" "Cyanobacteria" "Melainabacteria" "Gastranaerophilales" NA NA NA
GACGAACGCTGGCGGCGTGCTTAACACATGCAAGTCGAACGGAGCACCCCTGAAGGAGTTTTCGGACAACGGAAGGGAATGCTTAGTGGCGGACTGGTGAGTAACGCGTGAGGAACCTGCCTTTCGGAGGGGGACAACAGTTGGAAACGACTGCTAATACCGCATGACGTATCGGGATCGCATGGTCTTGATACCAAAGATTTTATCGCCGAAAGATGGCCTCGCGTCTGATTAGCTAGTTGGTGGGGTAACGGCCTACCAAGGCGACGATCAGTAGCCGGACTGAGAGGTTGGCCGGCCACATTGGGACTGAGATACGGCCCAG "Bacteria" "Firmicutes" "Clostridia" "Clostridiales" "Ruminococcaceae" "O…
GATGAACGCTGGCGGTGCGCCTAACACATGCAAGTCGAACGAAGGATTGTGAAGGAACTTTACGGAGGGAAAACACAATGACTGAGTGGCGGACGGGTGAGTAACGCGTAGGGAACCTGGCCCTTACAGGGGGATAACAGATGGAAACAACTGCTAATACCGCATAAGCGCCCAGCCTCGCATGAGGCAGAGTGAAAAACTAAGGTGGTAAGGGATGGCCCTGCGTCCGATTAGCTAGTTGGTATGGTAACGGCATACCAAGGCGACGATCGGTAGCCGGCCTGAGAGGGTGGACGGCCACATTGGGACTGAGACACGGCCCAA "Bacteria" "Firmicutes" "Clostridia" "Clostridiales" "Lachnospiraceae" NA …
GATGAACGCTGGCGGCATGCCTAACACATGCAAGTCGAACGAGAATCTATGGATAGAGGATTCGTCCAATTGAAATAGAGGACAGTGGCGAACGGGTGAGTAATGCATGAGCAACCTGCCCTTCAGAGGGGGACAACAGTTGGAAACGACTGCTAATACCGCATAACATTTTGGGAAGGCATCTTCCTAAAATCAAAGATTTATCGCTGAAGGATGGGCTCATGTCTGATTAGCTAGTTGGCGGGGTAACGGCCCACCAAGGCTGCGATCAGTAGCCGGTCTGAGAGGATGAACGGCCACATTGGGACTGAGATACGGCCCAG "Bacteria" "Firmicutes" "Clostridia" "Clostridiales" "Ruminococcaceae" "Rum…
GATGAACGCTGGCGGCGTGCTTAACACATGCAAGTCGAACGGAGTTATCATTTTTGAAGCGATTAGCTTGCTAAGAGTGGAAATGTTGGTAACTTAGTGGCGGACGGGTGAGTAACGCGTGGAGAACCTGCCTTACACAGGGGGATAACACTTAGAAATAGGTGCTAATACCGCATAAGCGCACAGGACCGCATGGTCAAGTGTGAAAAACTGAGGTGGTGTAAGATGGCTCCGCGTCTGATTAGCTTGTTGGTAGGGTAACGGCCTACCAAGGCGACGATCAGTAGCCGGCCTGAGAGGGTGAACGGCCACATTGGGACTGAGACACGGCCCAA "Bacteria" "Firmicutes" "Clostridia" "Clostridiales" "Lachnospi…
GATGAACGCTGGCGGCGTGCTTAACACATGCAAGTCGAACGGAGTGTTTGTTGGAAATCTTTACGGAGATGGAAAAGAAATAACTTAGTGGCGGACGGGTGAGTAACGCGTGGGCAACCTGCCTCATACAGGGGGATAGCATCGGGAAACTGGTGGTAAAACCGCATAAGCGCACGAAGACGCATGTATTTGTGTGAAAAGGAGAAATCTGGTATGAGATGGACCCGCGTCTGATTAGCTAGTTGGAAAGGTAAAGGCTTACCAAGGCAACGATCAGTAGCCGGCCTGAGAGGGTGGACGGCCACATTGGGACTGAGACACGGCCCAG "Bacteria" "Firmicutes" "Clostridia" "Clostridiales" "Lachnospiraceae"…
GATGAACGCTGGCGGCATGCCTAACACATGCAAGTCGAACGGGGTTTATATAACAGAACTCTCCGGAGGGAAGATATATAAACCTAGTGGCGGACGGGTGAGTAACGCGTGGGCAACCTGCCCTGTACCGGGGGACAACAGCCAGAAATGGCTGCTAATACCGCATAAGCCTGCGGTGCCGCATGGCACAGCAGGGAAAACCACGGTGGTACAGGATGGGCCCGCGTCTGATTAGTTAGTTGGCAGGGTAACGGCCTACCAAGACGATGATCAGTAGCCGGCTTGAGAGAGTGGACGGCCACATTGGGACTGAGACACGGCCCAG "Bacteria" "Firmicutes" "Clostridia" "Clostridiales" "Lachnospiraceae" "L…
GATGAACGCTGGCGGCGTGCCTAACACATGCAAGTCGAACGGGAACGTTTCAAGGAAGAAGTTTCGGCGGAATCCAGAAGCGTTTTAGTGGCGGACGGGTGAGTAACGCGTGGGCAACCTGCCTTACACAGGGGGATAACACTTAGAAATAGGTGCTAATACCGCATAAGCGCACAGCTTTGCATGAAGCAGTGTGAAAAACTCCGGTGGTGTAAGATGGACCCGCGTCTGATTAGCTGGTTGGCAGGGTAAAGGCCTACCAAGGCGACGATCAGTAGCCGGCCTGAGAGGGTGAACGGCCACATTGGGACTGAGACACGGCCCAG "Bacteria" "Firmicutes" "Clostridia" "Clostridiales" "Lachnospiraceae" N…
GATGAACGCTGGCGGCGTGCCTAACACATGCAAGTCGAGCGAAGCGCTTAAATTAGATTCTTCGGATGAAGATTTTTGCGACTGAGCGGCGGACGGGTGAGTAACGCGTGGGTAACCTGCCTTACACAGGGGGATAACAGTTAGAAATGACTGCTAATACCGCATAAGACCACAGTACCGCATGGTATCGTGGTAAAAACTGAGGTGGTGTAAGATGGACCCGCGTCTGATTAGGTAGTTGGTGGGGTAACGGCCCACCAAGCCGACGATCAGTAGCCGGCCTGAGAGGGTGGACGGCCACATTGGGACTGAGACACGGCCCAG "Bacteria" "Firmicutes" "Clostridia" "Clostridiales" "Lachnospiraceae" "La…
GACGAACGCTGGCGGCGTGCCTAATGCATGCAAGTCGAACGGTGGTTTTCGGACCGCCGTGGCGCACGGCTGAGTAACACGTGGGGACCTGCCCAAGTGTGGGGGATAACAGGCCGAAAGGTCTGCTAATCCCGCATACGCTCTACGGAGGAAAGCTACTTCGGTGGCGCACCTGGAGGGTCCTGCGGCCCATCAGCTCGTTGGCGGGGTAATGGCCCACCAAGGCAATGACGGGTAGCTGGTCTGTGAGGACGACCAGCCAGACTGGGACTGAGACACGGCCCAG "Bacteria" "Chloroflexi" "Chloroflexia" "Chloroflexales" "Roseiflexaceae" NA NA
GACGAACGCTGGCGGCGCGCCTAACACATGCAAGTCGAACGGAGCTTATATTTCAGAAGTTTTCGGATGGACGAGAGATAAGCTTAGTGGCGGACGGGTGAGTAACACGTGAGCAACCTGCCTTTCAGAGGGGGATAACAGTTGGAAACGACTGCTAATACCGCATAACGCTGCGATGGGGCATCCCGATGCAGCCAAAGGAGCAATCCGCTGGAAGATGGGCTCGCGGCCGATTAGCTAGTTGGTGGGGCAACGGCCCACCAAGGCGACGATCGGTAGCCGGACTGAGAGGTTGATCGGCCACATTGGGACTGAGACACGGCCCAG "Bacteria" "Firmicutes" "Clostridia" "Clostridiales" "Ruminococcaceae" …
GATGAACGCTGGCGGCGTGCTTAACACATGCAAGTCGAATGTAGCAATACATGGCGGACGGGTGAGTAACGCGTGAGCAATCTGCCCATATCTGTGGGATAACAGTTGGAAACGACTGATAATACCGCATAATATCGTAGGAAGGCATCTTCCAACGATCAAAGATTTATCGGATATGGATGAGCTCGCGTCTGATTAGCTTGTTGGTGAGGTAACGGCTCACCAAGGCGACGATCAGTAGCCGACCTGAGAGGGTGATCGGCCACATTGGAACTGAGACACGGTCCAA "Bacteria" "Firmicutes" "Clostridia" "Clostridiales" "Clostridiales_vadinBB60_group" NA NA
GATGAACGCTGGCGGCGTGCCTAACACATGCAAGTCGAACGGATCCATACTGAAACCTAGTGATGTATGGATTAGTGGCGGACGGGTGAGTAACGCGTGGATAACCTGCCGTATACAGGGGGATAACACTTAGAAATAGGTGCTAATACCGCATAAGCGCACGGTTCCGCATGGAACAGTGTGAAAAACTCCGGTGGTATACGATGGATCCGCGTCTGATTAGCCAGTTGGCGGGGTAACGGCCCACCAAAGCGACGATCAGTAGCCGGCCTGAGAGGGTGAACGGCCACATTGGGACTGAGACACGGCCCAA "Bacteria" "Firmicutes" "Clostridia" "Clostridiales" "Lachnospiraceae" "Lachnospirace…
GACGAACGCTGGCGGCGTGCTTAACACATGCAAGTCGAACGATGAAGACTGGTGCTTGCACTGGTTGGATTAGTGGCGAACGGGTGAGTAATACGTGAGTAACCTGCCTTTGACTCTGGGATAAGCCTGGGAAACTGGGTCTAATACCGGATATGACAAGGAACCGCATGGTTTTTTGTGGAAAGGGTTTGTACTGGTTTTAGATGGGCTCACGGCCTATCAGCTTGTTGGTGGGGTAATGGCTCACCAAGGCGACGACGGGTAGCCGGCCTGAGAGGGTGACCGGCCACACTGGGACTGAGACACGGCCCAG "Bacteria" "Actinobacteria" "Actinobacteria" "Micrococcales" "Micrococcaceae" "Rothia…
GATGAACGCTGGCGGCGTGCCTAACACATGCAAGTCGAACGAAGCCCCCTGCACGAATTCTTCGGGAGGAGTGTGGGGAAGCTTAGTGGCGGACGGGTGAGTAACGCGTGGGCAACCTGCCCCATACAGGGGGATAACAGCCGGAAACGGCTGCTAATACCGCATAAGCGCACAGCGCCGCATGGCGCGGTGTGAAAAACTCCGGTGGTATGGGATGGGCCCGCGTCTGATTAGCCGGTTGGCGGGGTAACGGCCCACCAAAGCAACGATCAGTAGCCGGCCTGAGAGGGTGGACGGCCACATTGGGACTGAGAGACGGCCCAG "Bacteria" "Firmicutes" "Clostridia" "Clostridiales" "Lachnospiraceae" NA …
GATGAACGCTAGCGACAGGCTTAACACATGCAAGTCGAGGGGCAGCGGGTAGATGAGCTTGCTCATTTATGCCGGCGACCGGCGCACGGGTGAGTAACACGTATGCAACCTGCCCGTCTCAGGGGGATAATCGTCGGAAACGGCGTCTAATACCCCGTATGAAGCTGGACGGCATCGTCTGGTTTTGAAAGAATATCGGAGACGGATGGGCATGCGGCGCATTAGCTGGTTGGCGGGGTAACGGCCCACCAAGGCGACGATGCGTAGGGGTTCTGAGAGGAAGGTCCCCCACACTGGTACTGAGACACGGACCAG "Bacteria" "Bacteroidetes" "Bacteroidia" "Bacteroidales" "Muribaculaceae" NA NA
GACGAACGCTGGCGGCACGCCTAACACATGCAAGTCGAACGGAGTTTTAGATGCTTGCATCTGAAACTTAGTGGCGGACGGGTGAGTAACACGTGAGCAACCTGCCTTCCAGAGGGGGATAACGTTTGGAAACGAACGCTAATACCGCATAACATATATTTATCACATGGTAGATATATCAAAGGAGCAATCCGCTGGGAGATGGGCTCGCGTCCGATTAGATAGTTGGCGGGGTAACGGCCCACCAAGTCAACGATCGGTAGCCGGACTGAGAGGTTGAACGGCCACATTGGGACTGAGACACGGCCCAG "Bacteria" "Firmicutes" "Clostridia" "Clostridiales" "Ruminococcaceae" NA NA
GATGAACGCTGGCGGCGTGCCTAACACATGCAAGTCGAGCGAAGCATTTAACATGAAGTTTTCGGACGGAATGTTATCTGACTGAGCGGCGGACGGGTGAGTAACGCGTGGGTAACCTGCCTTATACAGGGGGATAACAGTTAGAAATGACTGCTAATACCGCATAAGCGCACAGTACCGCATGGTACAGTGTGAAAAACTCCGGTGGTATAAGATGGACCCGCGTCTGATTAGCCAGTTGGCGGGGTAACGGCCCACCAAAGCGACGATCAGTAGCCGACCTGAGAGGGTGACCGGCCACATTGGGACTGAGACACGGCCCAA "Bacteria" "Firmicutes" "Clostridia" "Clostridiales" "Lachnospiraceae" NA …
GATGAACGCTGGCGGCGTGCTTAACACATGCAAGTCGAACGGAGTACCCTTGAAGGAGTTTTCGGACAACTGAAAGGACTACTTAGTGGCGGACGGGTGAGTAACGCGTGAGTAACCTGCCTTGGAGTGGGGAATAACAGCTGGAAACAGCTGCTAATACCGCATGATGCAGTTGAGTCGCATGGCTCTGACTGCCAAAGATTTATCGCTCTGAGATGGACTCGCGTCTGATTAGCTAGTTGGTGGGGCAACGGCCCACCAAGGCGACGATCAGTAGCCGGACTGAGAGGTTGGCCGGCCACATTGGGACTGAGACACGGCCCAG "Bacteria" "Firmicutes" "Clostridia" "Clostridiales" "Ruminococcaceae" "R…
GACGAACGCTGGCGGCGTGCTTAACACATGCAAGTCGAACGGGGCACCCTTGAAGGAGTTTTCGGACAACGGAGAGGAATGCTTAGTGGCGGACTGGTGAGTAACGCGTGAGGAACCTGCCTTTCGGAGGGGGACAACAGTTGGAAACGACTGCTAATACCGCATGATACATTTGGGCCGCATGGTCTGAATGTCAAAGATTTATCGCCGAAAGATGGCCTCGCGTCTGATTAGCTAGTTGGTGGGGTAACGGCCCACCAAGGCGACGATCAGTAGCCGGACTGAGAGGTTGGCCGGCCACATTGGGACTGAGATACGGCCCAG "Bacteria" "Firmicutes" "Clostridia" "Clostridiales" "Ruminococcaceae" "Os…
GATGAACGCTAGCGACAGGCTTAACACATGCAAGTCGAGGGGCAGCGGAGGCGAGAGCTTGCTCTCGCCTGCCGGCGACCGGCGCACGGGTGAGTAACACGTATGCAACCTGCCCCCTGCAGGAGGATAACCGGGAGAAATCCCGACTAATACTGCATAACGCACCTTGTCCACATGGATTGGGTGTCAAAGGAAGCAATTCCGGCAGGGGATGGGCATGCGGCGCATTAGCCAGTTGGCGGGGTAACGGCCCACCAAAGCGACGATGCGTAGGGGTTCTGAGAGGAAGGTCCCCCACATTGGTACTGAGACACGGACCAA "Bacteria" "Bacteroidetes" "Bacteroidia" "Bacteroidales" "Muribaculaceae" NA …
GATGAACGCTGGCGGCGTGCTTAACACATGCAAGTCGAACGAAGCACGGGGACGGAAGCCCTCCGGGGTGGAAGGCCGCGTGACTGAGTGGCGGACGGGTGAGTAACGCGTGGGTAACCTGCCCCATACAGGGGGATAACAGCCGGAAACGGCTGCTAATACCGCATGCACATGCGGGGGCGCATGCCCCTGCATGGAAAGCTTTCGCGGTATGGGATGGGCCCGCGTCTGATTAGGCAGTTGGCGGGGTAACGGCCCACCAAACCGACGATCAGTAGCCGGCCTGAGAGGGCAACCGGCCACATTGGGACTGAGACACGGCCCAA "Bacteria" "Firmicutes" "Clostridia" "Clostridiales" "Lachnospiraceae" N…
GATGAACGCTGGCGGCGTGCTTAACACATGCAAGTCGAACGGGGTACCCTTGAAGGAGGCTTCGGCCAACGGAAAGGAATACCTAGTGGCGGACGGGTGAGTAACGCGTGAGGAACCTGCCTTGGAGTGGGGAATAACAGCTAGAAATAGCTGCTAATACCGCATAATGCAACTAAGTCGCATGGCTTTGGTTGCCAAAGATTTATCGCTCTGAGATGGCCTCGCGTCTGATTAGATAGTTGGCGGGGTAACGGCCCACCAAGTCGACGATCAGTAGCCGGACTGAGAGGTTGGCCGGCCACATTGGGACTGAGACACGGCCCAG "Bacteria" "Firmicutes" "Clostridia" "Clostridiales" "Ruminococcaceae" "R…
GATGAACGCTAGCTACAGGCTTAACACATGCAAGTCGCGGGGCAGCATGGATGTCCTTTCGGGGACATCTGATGGCGACCGGCGCACGGGTGAGTAACGCGTATCCAACCTGCCCTTTACTATGGGACAGCCCGTCGAAAGGCGGATTAATACCGTATGTTGTCATGTTGATGCATATTTTCATGACCAAAGGCGTTAGTCGGTAAAGGATGGGGATGCGTCTGATTAGCTTGCCGGCGGGGTAACGGCCCACCGGGGCGACGATCAGTAGGGGTTCTGAGAGGAAGGTCCCCCACATTGGAACTGAGACACGGTCCAA "Bacteria" "Bacteroidetes" "Bacteroidia" "Bacteroidales" "Prevotellaceae" "Prev…
GATGAACGCTGGCGGCGTGCCTAACACATGCAAGTCGAACGGGAACGGCCCACGGGCGGGATTTCGGTCAAGCCCCGGACTGTTTTAGTGGCGGACGGGTGAGTAACGCGTGGGCAACCTGCCCCGTACCGGGGGATAACACCTGGAAACAGGTGCTAATACCGCATAACAGGAGAGAGCGCATGCAGTCTCCTTGAAAACTCCGGTGGTACGGGATGGACCCGCGTCTGATTAGCTGGTTGGCGGGGTAACGGCCCACCAAGGCGACGATCGGTAGCCGGCCTGAGAGGGTGGACGGCCACATTGGGACTGAGACACGGCCCAG "Bacteria" "Firmicutes" "Clostridia" "Clostridiales" "Lachnospiraceae" NA…
GATGAACGCTGGCGGCGTGCTTAACACATGCAAGTCGAACGAAGCACTTAGGAAAGATTCTTCGGATGAAAGCCTTTGTGACTGAGTGGCGGACGGGTGAGTAACGCGTGGGTAACCTACCTCATACAGGGGGATAACAGTTGGAAACGACCGCTAATACCGCATAACCCGCTAGTATCGCATGATACAGACGGAAAAGATTTATCGGTATGAGATGGACCCGCGTCTGATTAGCCAGTTGGCAGGGTAACGGCCTACCAAAGCGACGATCAGTAGCCGGCCTGAGAGGGTGAACGGCCACATTGGGACTGAGACACGGCCCAA "Bacteria" "Firmicutes" "Clostridia" "Clostridiales" "Lachnospiraceae" NA …
GATGAACGCTGGCGGCGTGCCTAACACATGCAAGTCGAGCGAAGCGCTTAAGTCAGATTCTTCGGATGAAGGCTTTTGTGACTGAGCGGCGGACGGGTGAGTAACGCGTGGGTAACCTGCCTTACACAGGGGGATAACAGTTAGAAATGACTGCTAATACCGCATAAGACCACAGTACTGCATGGTACAGTGGTAAAAACTGAGGTGGTGTAAGATGGACCCGCGTCTGATTAGGTAGTTGGTGGGGTAACGGCCCACCAAGCCGACGATCAGTAGCCGGCCTGAGAGGGTGGACGGCCACATTGGGACTGAGACACGGCCCAG "Bacteria" "Firmicutes" "Clostridia" "Clostridiales" "Lachnospiraceae" "La…
GATGAACGCTGGCGGCGTGCCTAACACATGCAAGTCGAGCGAAGCATTTAACATGAAGTTTTCGGACGGAATGTTATCTGACTGAGCGGCGGACGGGTGAGTAACGCGTGGGTAACCTGCCTTATACAGGGGGATAACAGTTAGAAATGACTGCTAATACCGCATAAGCGCACAGTACTGCATGGTACAGTGTGAAAAACTCCGGTGGTATAAGATGGACCCGCGTCTGATTAGCCAGTTGGCGGGGTAACGGCCCACCAAAGCGACGATCAGTAGCCGACCTGAGAGGGTGACCGGCCACATTGGGACTGAGACACGGCCCAA "Bacteria" "Firmicutes" "Clostridia" "Clostridiales" "Lachnospiraceae" NA …
GACGAACGCTGGCGGCGTGCTTAACACATGCAAGTCGAACGGAGCGCTCATGAAAGAGTTTTCGGACAATGGATTGAGTTGCTTAGTGGCGGACTGGTGAGTAACGCGTGAGGAACCTGCCTTCCAGAGGGGGACAACAGTTGGAAACGACTGCTAATACCGCATGACGCATGACTGTGGCATCACAGACATGTCAAAGATTTATCGCTGGAAGATGGCCTCGCGTCTGATTAGCTAGTTGGTGAGGTAACGGCCCACCAAGGCGACGATCAGTAGCCGGACTGAGAGGTTGGCCGGCCACATTGGGACTGAGATACGGCCCAG "Bacteria" "Firmicutes" "Clostridia" "Clostridiales" "Ruminococcaceae" "Os…
AGCGAACGCTGGCGGCAGGCCTAACACATGCAAGTCGAACGAACTCTTCGGAGTTAGTGGCGGACGGGTGAGTAACACGTGGGAACGTGCCTTTAGGTTCGGAATAACTCAGGGAAACTTGTGCTAATACCGAATGTGCCCTTCGGGGGAAAGATTTATCGCCTTTAGAGCGGCCCGCGTCTGATTAGCTAGTTGGTGAGGTAATGGCTCACCAAGGCGACGATCAGTAGCTGGTCTGAGAGGATGATCAGCCACATTGGGACTGAGACACGGCCCAA "Bacteria" "Proteobacteria" "Alphaproteobacteria" "Caulobacterales" "Caulobacteraceae" "Brevundimonas" "nasdae"
GATGAACGCTGGCGGCGTGCTTAACACATGCAAGTCGAACGAAGCGATTAAGAGGAAGTTTTCGGATGGAATCTTAATTGACTGAGTGGCGGACGGGTGAGTAACGCGTGGGTAACCTGCCTCATACAGGGGGATAACAGTTAGAAATGACTGCTAATACCGCATAAGCGCACGGAGATGCATGTCTCTGTGTGAAAAACTCCGGTGGTATGAGATGGACCCGCGTCTGATTAGCTGGTTGGCGGGGTAACGGCCCACCAAGGCGACGATCAGTAGCCGACCTGAGAGGGTGACCGGCCACATTGGGACTGAGACACGGCCCAA "Bacteria" "Firmicutes" "Clostridia" "Clostridiales" "Lachnospiraceae" NA …
GATGAACGCTGGCGGCGTGCCTAACACATGCAAGTCGAGCGAAGCGCTTAAATTAGATTCTTCGGATGAAGATTTTTGCGACTGAGCGGCGGACGGGTGAGTAACGCGTGGGTAACCTGCCTTACACAGGGGGATAACAGTTAGAAATGACTGCTAATACCGCATAAGACCACAGTACCGCATGGTATGGTGGTAAAAACTGAGGTGGTGTAAGATGGACCCGCGTCTGATTAGGTAGTTGGTGGGGTAACGGCCCACCAAGCCGACGATCAGTAGCCGGCCTGAGAGGGTGGACGGCCACATTGGGACTGAGACACGGCCCAG "Bacteria" "Firmicutes" "Clostridia" "Clostridiales" "Lachnospiraceae" "La…
GATGAACGCTGGCGGCGTGCTTAACACATGCAAGTCGAACGAAGCACTGGAAAGGAATCCCTTCGGGGAGGACATTCCTTTGACTGAGTGGCGGACGGGTGAGTAACGCGTGGGCAACCTGCCCCACACTGGGGGACAACAGCTGGAAACGGCTGCTAATACCGCATAAGCGCACAGCTTCGCATGAAGCAGTGTGAAAAATTCCGGTGGTGTGGGATGGGCCCGCGTCTGATTAGCTAGTTGGTGAGGTAACGGCTCACCAAGGCGACGATCAGTAGCCGGCCTGAGAGGGTGGACGGCCACATTGGGACTGAGACACGGCCCAG "Bacteria" "Firmicutes" "Clostridia" "Clostridiales" "Lachnospiraceae" N…
GATGAACGCTGGCGGCATGCCTAAGACATGCAAGTCGAACGAGATGGCCCAATGAAGATGGAGTGCTTGCACAAAATCTGATTTGGAATTTCCATCTAGTGGCGCAAGGGTGAGTAACACGTAGGAAATCTACCTTTAAGACTGGAATAACAATTAGAAATGATTGCTAATACCGGATAATATATATATTGATAAGTCAATGTATATTAAAAGGAGCCTTTAAAGCTTCACTTAGAGATGAGCCTGCGGCGTATTAGCTAGTTGGTAGGGTAAAGGCCTACCAAGGCAATGATGCGTAGCCGACCTGAGAGGGTGATCGGCCACACTGGGACTGAGACACGGCCCAG "Bacteria" "Tenericutes" "Mollicutes" "Mollicutes_R…
GATAAACGCTGGCGGCGCACATAAGACATGCAAGTCGAACGGACTTAACCCTTTGTTTACATTGGGAGCGGTTAGTGGCGGACTGGTGAGTAACACGTAAGCAACCTGCCTATCAGAGGGGAATAACAGTGAGAAATCATTGCTAATACCGCATATGCTAACAGTATCGCATGATACAGTTAGGAAAGGAGCAATCCACTGGTAGATGGGCTTGCGTCTGATTAGCTAGTTGGTGGGGTAATGGCCTACCAAGGCGACGATCAGTAGCCGGACTGAGAGGTTGAACGGCCACATTGGGACTGAGATACGGCCCAG "Bacteria" "Firmicutes" "Clostridia" "Clostridiales" "Ruminococcaceae" "Ruminococca…
GACGAACGCTGGCGGCGCGCCTAACACATGCAAGTCGAACGGAACGAATTTCTAGAAGTTTACGGATGGAAGGGAATAAGTTTAGTGGCGGACGGGTGAGTAACGCGTGAGTAACCTGCCTTTTAGAGGGGGATAACGTTTAGAAATGAACGCTAATACCGCATAACATATAAGTTTCGCATGGAACTGATATCAAAGGAGAAATCCGCTAAAAGATGGACTCGCGTCCAATTAGCTAGTTGGTAGGGTAAAGGCCTACCAAGGCGACGATTGGTAGCCGGACTGAGAGGTTGACCGGCCACATTGGGACTGAGACACGGCCCAG "Bacteria" "Firmicutes" "Clostridia" "Clostridiales" "Ruminococcaceae" NA…
GATGAACGCTGGCGGCGTGCTTAACACATGCAAGTCGAACGAAGCGTGTAAAACAATCCTTCGGGTGCGTTTTATATGACTGAGTGGCGGACGGGTGAGTAACGCGTGGGGAACCTGCCGTATGCAGGGGGACAACAGTCAGAAATGACTGCTAATACCGCATAAGCACACAATGCTGCATGGCATGGTGTGAAAAGATTTATCGGCATACGATGGCCCCGCGTCTGATTAGCCAGTTGGCAGGGTAACGGCCTACCAAAGCAACGATCAGTAGCCGGCTTGAGAGAGTGACCGGCCACATTGGGACTGAGACACGGCCCAG "Bacteria" "Firmicutes" "Clostridia" "Clostridiales" "Lachnospiraceae" NA NA
GATGAACGCTGGCGGCGTGCCTAACACATGCAAGTCGAACGGGTGTACGGGATGGAAGGCTCCGGCCGGAAGCCCCGTGCATGAGTGGCGGACGGGTGAGTAACGCGTGGGCAACCTGCCCTGTACAGGGGGACAACACTTAGAAATAGGTGCTAATACCGCATAACGGGGGGAGCCGCATGGCACCCCCCTGAAAACTCCGGTGGTACAGGATGGGCCCGCGTCTGATTAGCTAGTTGGCAGGGTAACGGCCTACCAAGGCGACGATCAGTAGCCGGCCTGAGAGGGCGGACGGCCACACTGGGACTGAGACACGGCCCAG "Bacteria" "Firmicutes" "Clostridia" "Clostridiales" "Lachnospiraceae" NA NA
GATAAACGCTGGCGGCGCACATAAGACATGCAAGTCGAACGGACTTAACCGAAGTATTTATATTTTGGAGCGGTTAGTGGCGGACTGGTGAGTAACACGTAAGCAACCTGCCTATTAGAGGGGAATAACAGTGAGAAATCATTGCTAATACCGCATATGCTGTGAGTATCGCATGGTACAAACAGGAAAGGAGCAATCCGCTAATAGATGGGCTTGCGTCTGATTAGATAGTTGGTGGGGTAATGGCCTACCAAGTCAACGATCAGTAGCCGAACTGAGAGGTTGAACGGCCACATTGGGACTGAGATACGGCCCAG "Bacteria" "Firmicutes" "Clostridia" "Clostridiales" "Ruminococcaceae" "Ruminococ…
GATGAACGCTGGCGGCGTGCTTAACACATGCAAGTCGAACGGAGATAACATTTTCGAAGCGATTAGTTTACTAAGAGCGGAGATGTTGCTATCTTAGTGGCGGACGGGTGAGTAACGCGTGGGTAACCTGCCTTACACTGGGGGATAACACTTAGAAATAGGTGCTAATACCGCATAACAGTAGGAGACGCATGTCTTTTACTTGAAAACTCCGGTGGTGTAAGATGGACCCGCGTCTGATTAGCTTGTTGGCGGGGTAACGGCTCACCAAGGCAACGATCAGTAGCCGGCCTGAGAGGGTGAACGGCCACATTGGGACTGAGACACGGCCCAA "Bacteria" "Firmicutes" "Clostridia" "Clostridiales" "Lachnospir…
GATGAACGCTGGCGGCGTGCCTAATACATGCAAGTCGAGCGAACAGACGAGGAGCTTGCTCCTCTGACGTTAGCGGCGGACGGGTGAGTAACACGTGGATAACCTACCTATAAGACTGGGATAACTTCGGGAAACCGGAGCTAATACCGGATAATATATTGAACCGCATGGTTCAATAGTGAAAGACGGTTTTGCTGTCACTTATAGATGGATCCGCGCCGCATTAGCTAGTTGGTAAGGTAACGGCTTACCAAGGCAACGATGCGTAGCCGACCTGAGAGGGTGATCGGCCACACTGGAACTGAGACACGGTCCAG "Bacteria" "Firmicutes" "Bacilli" "Bacillales" "Staphylococcaceae" "Staphylococcu…
ATTGAACGCTGGCGGCAGGCCTAACACATGCAAGTCGAACGGTAACAGGAAGCAGCTTGCTGCTTTGCTGACGAGTGGCGGACGGGTGAGTAATGTCTGGGAAACTGCCTGATGGAGGGGGATAACTACTGGAAACGGTAGCTAATACCGCATAACGTCGCAAGACCAAAGAGGGGGACCTTCGGGCCTCTTGCCATCGGATGTGCCCAGATGGGATTAGCTAGTAGGTGGGGTAACGGCTCACCTAGGCGACGATCCCTAGCTGGTCTGAGAGGATGACCAGCCACACTGGAACTGAGACACGGTCCAG "Bacteria" "Proteobacteria" "Gammaproteobacteria" "Enterobacteriales" "Enterobacteriacea…
GACGAACGCTGGCGGCGTGCTTAACACATGCAAGTCGAACGGAGCACCCCTGAAGGAGTTTTCGGACAACGGATGGGAATGCTTAGTGGCGGACTGGTGAGTAACGCGTGAGGAACCTGCCCTTCAGAGGGGGACAACAGTTGGAAACGACTGCTAATACCGCATGATACATTTGAATCGCATGGTTTGAATGTCAAAGATTTATCGCTGAAGGATGGCCTCGCGTCTGATTAGCTAGTTGGTGGGGTAACGGCCCACCAAGGCGACGATCAGTAGCCGGACTGAGAGGTTGGCCGGCCACATTGGGACTGAGATACGGCCCAG "Bacteria" "Firmicutes" "Clostridia" "Clostridiales" "Ruminococcaceae" "Os…
GATGAACGCTGGCGGCGTGCTTAACACATGCAAGTCGAACGAAGCACTTGAGATTGAATCTTCGGATGAGAACTCTTGTGACTGAGTGGCGGACGGGTGAGTAACGCGTGGGTAACCTACCTCATACAGGGGGATAACAGTTGGAAACGACCGCTAATACCGCATAACCCGCTAGTATCGCATGATACGGACGGAAAAGATTTATCGGTGTGAGATGGACCCGCGTCTGATTAGCCAGTTGGCAGGGTAACGGCCTACCAAAGCGACGATCAGTAGCCGGCCTGAGAGGGTGAACGGCCACATTGGGACTGAGACACGGCCCAA "Bacteria" "Firmicutes" "Clostridia" "Clostridiales" "Lachnospiraceae" NA …
GATGAACGCTAGCGACAGGCTTAACACATGCAAGTCGAGGGGCAGCGGTGTTGGAGGCTTGCCTCCAACAGCCGGCGACCGGCGCACGGGTGAGTAACACGTATGCAACCTGGCCGTCACAGGGGGATAACCGGTAGAAATGCCGCCTAATACCCCATGACACCCTTTAGGGGCATCCCTGGGGGGTCAAAGGGAGCGATCCCGGTGGCGGATGGGCATGCGGCGCATTAGCTAGTCGGCGGGGTAACGGCCCACCGAGGCGACGATGCGTAGGGGTTCTGAGAGGAAGGTCCCCCACATTGGAACTGAGACACGGTCCAA "Bacteria" "Bacteroidetes" "Bacteroidia" "Bacteroidales" "Muribaculaceae" NA …
GACGAACGCTGGCGGCGTGCTTAACACATGCAAGTCGAGCGGGCGTAGCAATACGTCAGCGGCGGACGGGTGAGTAACGCGTGAGCAATCTGCCTCTATCAGCGGGATAACACTTAGAAATAGGTGCTAATACCGCATAAGACCACGAATCCGCATGGGTTTGGGGTAAAAACTCCGGTGGATAGAGATGAGCTCGCGTCCCATTAGCTAGTTGGTAGTGTAACGGACTACCAAGGCGACGATGGGTAGCCGACCTGAGAGGGTGATCGGCCACATTGGAACTGAGAAACGGTCCAA "Bacteria" "Firmicutes" "Clostridia" "Clostridiales" "Clostridiales_vadinBB60_group" NA NA
GATGAACGCTGGCGGCGTGCCTAACACATGCAAGTCGAGCGAAGCGCTTAAATTGGATTCTTCGGATGAAGATTTTTGTGACTGAGCGGCGGACGGGTGAGTAACGCGTGGGTAACCTGCCTTACACAGGGGGATAACAGTTAGAAATGACTGCTAATACCGCATAAGACCACGGTACCGCATGGTATGGTGGTAAAAACTGAGGTGGTGTAAGATGGACCCGCGTCTGATTAGGTAGTTGGTGGGGTAACGGCCCACCAAGCCGACGATCAGTAGCCGCCCTGAGAGGGTGGACGGCCACATTGGGACTGAGACACGGCCCAG "Bacteria" "Firmicutes" "Clostridia" "Clostridiales" "Lachnospiraceae" "La…
GATGAACGCTAGCGACAGGCTTAACACATGCAAGTCGAGGGGCAGCGGAGGCGAGAGCTTGCTCTCGCCTGCCGGCGACCGGCGCACGGGTGAGTAACACGTATGCAACCTGCCCCCTGCAGGAGGATAACCGGGAGAAATCCCGACTAATACTGCATAACACCCTGGGGCCACATGGCCTCGGGGTCAAAGGAAGCAATTCCGGCAGGGGATGGGCATGCGGCGCATTAGCCAGTTGGCGGGGTAACGGCCCACCAAAGCGACGATGCGTAGGGGTTCTGAGAGGAAGGTCCCCCGCATTGGTACTGAGACACGGACCAA "Bacteria" "Bacteroidetes" "Bacteroidia" "Bacteroidales" "Muribaculaceae" NA …
GACGAACGCTGGCGGCGCGCCTAACACATGCAAGTCGAACGGGGATATGCTGGACAAGGCTTCGGCCGAGGAAGGCATATTCGAGTGGCGGACGGGTGAGTAACGCGTGAGCAACCTGCCTTTCAGAGGGGGATAACGATTGGAAACGATCGCTAATACCGCATAACATTGCAGAGCCGCATGGTTTTGCAATCAAAGGAGCAATCCGCTGAGAGATGGGCTCGCGTCCAATTAGGTAGATGGCGGGGTAGAGGCCCACCATGCCGACGATTGGTAGCCGGACTGAGAGGTTGAACGGCCACATTGGGACTGAGACACGGCCCAG "Bacteria" "Firmicutes" "Clostridia" "Clostridiales" "Ruminococcaceae" NA…
ATTGAACGCTGGCGGCGTGCTTAACACATGCAAGTCGAACGTGAAAGTCCTTCGGGATGAGTAAAGTGGCGCACGGGTGAGTAACGCGTGGATAATCTACCTTCAAGATGGGGATAACGGCTGGAAACGGTCGCTAATACCGAATAAGCTGTAGGTTTTGAATTTACGGTAAAGATGGCCTCTGCATGCAAGCTATCGCTTGAAGATGAGTCCGCGTCCCATTAGCTGGTTGGCGGGGTAACGGCCCACCAAGGCGACGATGGGTAGCCGGTCTGAGAGGATGATCGGCCACACTGGGACTGGAACACGGCCCAG "Bacteria" "Proteobacteria" "Deltaproteobacteria" "Desulfovibrionales" "Desulfovibr…
GACGAACGCTGGCGGCGTGCTTAACACATGCAAGTCGAACGGAGCACCCCTGAAGGAGTTTTCGGACAACGGAAGGGAATGCTTAGTGGCGGACTGGTGAGTAACGCGTGAGGAACCTGCCTTTCGGAGGGGGACAACAGTTGGAAACGACTGCTAATACCGCATGACGCATTTGGATCGCATGGTCTGAATGTCAAAGATTTATCGCCGAAAGATGGCCTCGCGTCTGATTAGCTTGTTGGTGAGGTAACGGCCCACCAAGGCGACGATCAGTAGCCGGACTGAGAGGTTGGCCGGCCACATTGGGACTGAGATACGGCCCAG "Bacteria" "Firmicutes" "Clostridia" "Clostridiales" "Ruminococcaceae" "Ru…
GATGAACGCTGGCGGCGTGCCTAACACATGCAAGTCGAACGGGTGTACAGAAGGGAAGATTACGGTCGGAAGATCTGTGCATGAGTGGCGGACGGGTGAGTAACGCGTGGGCAACCTGGCCTGTACAGGGGGATAACACTTAGAAATAGGTGCTAATACCGCATAACGGGAGAAGCCGCATGGCTTTTCCCTGAAAACTCCGGTGGTACAGGATGGGCCCGCGTCTGATTAGCCAGTTGGCAGGGTAACGGCCTACCAAAGCGACGATCAGTAGCCGGCCTGAGAGGGCGGACGGCCACACTGGGACTGAGACACGGCCCAG "Bacteria" "Firmicutes" "Clostridia" "Clostridiales" "Lachnospiraceae" "Lach…
GATGAACGCTAGCTACAGGCTTAACACATGCAAGTCGAGGGGCAGCATGGTCTTAGCTTGCTAAGGCTGATGGCGACCGGCGCACGGGTGAGTAACACGTATCCAACCTGCCGTCTACTCTTGGCCAGCCTTCTGAAAGGAAGATTAATCCAGGATGGCATCATGAGTTCACATGTCCGCATGATTAAAGGTATTTTCCGGTAGACGATGGGGATGCGTTCCATTAGATAGTAGGCGGGGTAACGGCCCACCTAGTCAACGATGGATAGGGGTTCTGAGAGGAAGGTCCCCCACATTGGAACTGAGACACGGTCCAA "Bacteria" "Bacteroidetes" "Bacteroidia" "Bacteroidales" "Bacteroidaceae" "Bacter…
GATGAACGCTGGCGGCGTGCTTAACACATGCAAGTCGAACGGACTCATATTGAAACCTAGTGATGTATGAGTTAGTGGCGGACGGGTGAGTAACGCGTGGAGAACCTGCCGTATACTGGGGGATAACACTTAGAAATAGGTGCTAATACCGCATAAGCGCACAACTTCGCATGAAGCAGTGTGAAAAACTCTGGTGGTATACGATGGATCCGCGTCTGATTAGCTTGTTGGCGGGGTAAAGGCCCACCAAGGCGACGATCAGTAGCCGGCCTGAGAGGGTGAACGGCCACATTGGGACTGAGACACGGCCCAA "Bacteria" "Firmicutes" "Clostridia" "Clostridiales" "Lachnospiraceae" "Lachnospirace…
GATGAACGCTGGCGGCGTGCTTAACACATGCAAGTCGAACGGACCCATATTGAAACCTGGTGATATATGGGTTAGTGGCGGACGGGTGAGTAACGCGTGGGTAACCTGCCTTACACAGGGGGATAACACTTAGAAATAGGTGCTAAAACCGCATAAGCGCACAGCTTCGCATGAAGCGGTGTGAAAAACTCCGGTGGTGTAAGATGGACCCGCGTCTGATTAGCTTGTTGGCGGGGTAACGGCCCACCAAGGCGACGATCAGTAGCCGGCCTGAGAGGGCGGACGGCCACATTGGGACTGAGACACGGCCCAG "Bacteria" "Firmicutes" "Clostridia" "Clostridiales" "Lachnospiraceae" "Lachnospirace…
GATGAACGCTGGCGGCGTGCTTAACACATGCAAGTCGAACGGGGTACCCTTGACAGAGGCTTCGGCCAATTGATAGGAATACCTAGTGGCGGACGGGTGAGTAACGCGTGAGGAACCTGCCTTGGAGTGGGGAATAACAGTTAGAAATAGCTGCTAATACCGCATAATACAGCGGAGTCGCATGGCTCTGCTGTCAAAGATTTATCGCTCTGAGATGGCCTCGCGTCTGATTAGTTTGTTGGCGGGGTAACGGCCCACCAAGACGACGATCAGTAGCCGGACTGAGAGGTTGGCCGGCCACATTGGGACTGAGACACGGCCCAG "Bacteria" "Firmicutes" "Clostridia" "Clostridiales" "Ruminococcaceae" "Ru…
GATGAACGCTGGCGGCGTGCCTAATACATGCAAGTCGAGCGAATGGATTGAGAGCTTGCTCTCAAGAAGTTAGCGGCGGACGGGTGAGTAACACGTGGGTAACCTGCCCATAAGACTGGGATAACTCCGGGAAACCGGGGCTAATACCGGATAACATTTTGAACTGCATGGTTCGAAATTGAAAGGCGGCTTCGGCTGTCACTTATGGATGGACCCGCGTCGCATTAGCTAGTTGGTGAGGTAACGGCTCACCAAGGCAACGATGCGTAGCCGACCTGAGAGGGTGATCGGCCACACTGGGACTGAGACACGGCCCAG "Bacteria" "Firmicutes" "Bacilli" "Bacillales" "Bacillaceae" "Bacillus" NA
GACGAACGCTGGCGGCGCGCCTAACACATGCAAGTCGAACGGAACGAATTTCTAGAAGTTTACGGATGGAAGGGAATGAGTTTAGTGGCGGACGGGTGAGTAACGCGTGAGTAACCTGCCTTTTAGAGGGGGATAACGTTTAGAAATGAACGCTAATACCGCATAACATATAAGTTTCGCATGGAACTGATATCAAAGGAGAAATCCGCTAAAAGATGGACTCGCGTCCAATTAGCTAGTTGGTAGGGTAAAGGCCTACCAAGGCGACGATTGGTAGCCGGACTGAGAGGTTGACCGGCCACATTGGGACTGAGACACGGCCCAG "Bacteria" "Firmicutes" "Clostridia" "Clostridiales" "Ruminococcaceae" NA…
GATGAACGCTGGCGGCGTGCTTAACACATTCAAGTCGAACGAAGCATTTTGACTTAATCCTTCGGGAAGCGGTTGGGATGACTTAGTGGCGGACGGGTGAGTAACGCGTGAGCAACCTGCCTATGCGAGGGGGATAACAGCCGGAAACAGCTGCTAATACCGCATAACACATACTGATTGCATGGTTGGTATGTCAAAGAGCAATCGCGCATAGATGGGCTCGCGTCTGATTAGATAGTTGGTGAGGTAACGGCTCACCAAGTCGACGATCAGTAGCCGGACTGAGAGGTTGAACGGCCACATTGGAACTGAGAAACGGTCCAG "Bacteria" "Firmicutes" "Clostridia" "Clostridiales" "Ruminococcaceae" "Ru…
GACGAACGCTGGCGGCGTGCCTAACACATGCAAGTCGAACGGGACTTGGCCCTTCGGGGACAAGTTTAGTGGCGGACGGGTGAGTAACGCGTGAGCAACCTGCCTTTCAGAGGGGGACAACAGTTGGAAACGACTGCTAATACCGCATGATACTTTTAGGAGGCATCTCCAAAAAGTCAAAGATTTATCGCTGAAAGATGGGCTCGCGTCTGATTAGATAGTTGGTGGGGTAACGGCCTACCAAGTCAACGATCAGTAGCCGGACTGAGAGGTTGAACGGCCACATTGGGACTGAGATACGGCCCAG "Bacteria" "Firmicutes" "Clostridia" "Clostridiales" "Ruminococcaceae" "Ruminococcaceae_UCG…
GATGAACGCTGGCGGCGTGCCTAACACATGCAAGTCGAACGGGAGCGCGCAGAGGACGAGATTTCGGTCGAGTCGCACGCGCTTTAGTGGCGGACGGGTGAGTAACGCGTGGATAACCTGCCTTACACAGGGGGATAACGCTTAGAAATAGGCGCTAATACCGCATAAGCGCACAGCCTCGCATGAGGGAGTGTGAAAAGCCTCGGCGGTGTAAGATGGATCCGCGTCTGATTAGCCAGTTGGCGGGGTGACGGCCCACCAAAGCGACGATCAGTAGCCGGCCTGAGAGGGTGGACGGCCACATTGGGACTGAGACACGGCCCAG "Bacteria" "Firmicutes" "Clostridia" "Clostridiales" "Lachnospiraceae" NA…
GATGAACGCTAGCGACAGGCCTAACACATGCAAGTCGAGGGGCATCGGGGGTGGAAGCTTGCTTCCGCCTGCCGGCGACCGGCGCACGGGTGAGTAACGCGTATGCAACCTGCCCGGACCAGCGGGATAACCCGGGGAAACCCGGCCTAATACCGCACGGCGCCGCCAAGGGGCATCCCTTGGCGGCTAAAGAATCATCGGGTCCGGATGGGCATGCGTGGCATTAGCTTGTTGGCGGGGTAACGGCCCACCAAGGCGACGATGCCTAGGGGTTCTGAGAGGAAGGTCCCCCACACTGGTACTGAGACACGGACCAG "Bacteria" "Bacteroidetes" "Bacteroidia" "Bacteroidales" "Muribaculaceae" NA NA
GATGAACGCTGGCGGCATGCCTAACACATGCAAGTCGAACGAGAATCTGTGGATAGAGGATTCGTCCAATTGAAACAGAGGACAGTGGCGAACGGGTGAGTAATGCATGAGCAACCTGCCCTTCAGAGGGGGACAACAGTTGGAAACGACTGCTAATACCGCATAACATATCCGGGAGGCATCTCCTGGATATCAAAGATTTATCGCTGAAGGATGGGCTCATGTCTGATTAGCTAGTTGGTGGGGTAACGGCCCACCAAGGCTGCGATCAGTAGCCGGTCTGAGAGGATGAACGGCCACATTGGGACTGAGATACGGCCCAG "Bacteria" "Firmicutes" "Clostridia" "Clostridiales" "Ruminococcaceae" "Rum…
GATGAACGCTGGCGGCGTGCTTAACACATGCAAGTCGAACGGGGTGCCTTAGAAAGAGGATTCGTCCAATTGATAAGGTTACCTAGTGGCGGACGGGTGAGTAACGCGTGAGTAACCTGCCCTGGAGTGGGGAATAACAGCTGGAAACAGCTGCTAATACCGCATAATGCAGTTGGGTCGCATGGCTCTGACTGCCAAAGATTTATCGCTCTGGGATGGACTCGCGTCTGATTAGCTAGTTGGTGGGGTAACGGCCCACCAAGGCGACGATCAGTAGCCGGACTGAGAGGTTGGCCGGCCACATTGGGACTGAGACACGGCCCAG "Bacteria" "Firmicutes" "Clostridia" "Clostridiales" "Ruminococcaceae" "R…
ATTGAACGCTGGCGGCAGGCCTAACACATGCAAGTCGAGCGGATGAAGGGAGCTTGCTCCTGGATTCAGCGGCGGACGGGTGAGTAATGCCTAGGAATCTGCCTGGTAGTGGGGGATAACGTCCGGAAACGGGCGCTAATACCGCATACGTCCTGAGGGAGAAAGTGGGGGATCTTCGGACCTCACGCTATCAGATGAGCCTAGGTCGGATTAGCTAGTTGGTGGGGTAAAGGCCTACCAAGGCGACGATCCGTAACTGGTCTGAGAGGATGATCAGGCACACTGGAACTGAGACACGGTCCAG "Bacteria" "Proteobacteria" "Gammaproteobacteria" "Pseudomonadales" "Pseudomonadaceae" "Pseudo…
GATGAACGCTGGCGGCGTGCCTAACACATGCAAGTCGAACGGGGGCGGATTGAAACCTAGTGATATCCGCCCGAGTGGCGGACGGGTGAGTAACGCGTGGACAACCTGCCGCATGCAGGGGGATACCGGCTGGAAACAGCCGCTAATACCGCATATGCGCACGAGGGCCGCATGGCCCGGTGCGGAAAGGATGCAAATCCGGCATGCGATGGGTCCGCGTCCGATTAGCTAGTTGGCGGGGCAGCGGCCCACCAAGGCGACGATCGGTAGCCGGCCTGAGAGGGCGGACGGCCACATTGGGACTGAGACACGGCCCAG "Bacteria" "Firmicutes" "Clostridia" "Clostridiales" "Lachnospiraceae" NA NA
GATGAACGCTGGCGGCGTGCTTAACACATGCAAGTCGAACGGACTCATATTGAAACCTAGTGATGTATGAGTTAGTGGCGGACGGGTGAGTAACGCGTGGAGAACCTGCCGTATACTGGGGGATAACACTTAGAAATAGGTGCTAATACCGCATAAGCGCACAGCTTCGCATGAAGCAGTGTGGAAAACCAAAAGCTAAAGCTTTTGGTGGTATACGATGGATCCGCGTCTGATTAGCTGGTTGGCGGGGTAAAGGCCCACCAAGGCGACGATCAGTAGCCGGCCTGAGAGGGTGAACGGCCACATTGGGACTGAGACACGGCCCAA "Bacteria" "Firmicutes" "Clostridia" "Clostridiales" "Lachnospiraceae" …
GACGAACGCTGGCGGCGTGCTTAACACATGCAAGTCGAACGGAGCACCCCTGAAGGAGTTTTCGGACAACGGAAGGGAATGCTTAGTGGCGGACTGGTGAGTAACGCGTGAGGAACCTGCCTTTCGGAGGGGGACAACAGTTGGAAACGACTGCTAATACCGCATGACGTATCGGGATCGCATGGTCTTGATACCAAAGATTTTATCGCCGAAAGATGGCCTCGCGTCTGATTAGCTGGTTGGTGGGGTAACGGCCTACCAAGGCGACGATCAGTAGCCGGACTGAGAGGTTGGCCGGCCACATTGGGACTGAGATACGGCCCAG "Bacteria" "Firmicutes" "Clostridia" "Clostridiales" "Ruminococcaceae" "O…
GACGAACGCTGGCGGCATGCTTAACACATGCAAGTCGAACGGACTGATTCCTTCGGGATGAAAGTTAGTGGCGAACGGGTGAGTAATGTATGAGCAACCTGCCTCTATCAACGGGATAGCAGTTGGAAACGACTGGTAATACGGTATATGACCACAGCACGGCATCGTGCAGCGGTAAAAGATTTTATCGGATAGAGATGGGCTCATATCCCATTAGGTAGTTGGTGAGATAACAGCCCACCAAGCCTACGATGGGTAGCCGAGCTGAGAGGCTGATCGGCCACATTGGGACTGAAACACGGCCCAG "Bacteria" "Firmicutes" "Clostridia" "Clostridiales" "Clostridiales_vadinBB60_group" NA NA
GATGAACGCTGGCGGCGTGCTTAACACATGCAAGTCGAACGAGAACCAATGGAATGAGGATTCGTCCAAAGGAAGTTGGGGAAAGTGGCGGACGGGTGAGTAACGCGTGAGCAATCTGCCTTGGAGTGGGGAATAACGGCTGGAAACAGCCGCTAATACCGCATGATACAGCTATCCCGCATGGGGTTGGCTGTCAAAGATTTATCGCTCTGAGATGAGCTCGCGTCTGATTAGCTTGTTGGCGGGGTAACGGCCCACCAAGGCGACGATCAGTAGCCGGACTGAGAGGTTGGCCGGCCACATTGGGACTGAGACACGGCCCAG "Bacteria" "Firmicutes" "Clostridia" "Clostridiales" "Ruminococcaceae" NA …
GATGAACGCTAGCGGCAGGCTTAACACATGCAAGTCGGGCGGCAGCGGGGTGGGAGCTTGCTCCCACTGCCGGCGAGCGGCGCACGGGTGAGTAACACGTATGCAACCTGCCCCTGTCAGGGGGACAACCCGCCGAAAGGCGGGCTAAGCCCGCGTATATCGCCCCGGGGCATCCCGGGGGGAGGAAAGGAGCGATCCGGACAGGGATGGGCATGCGGCGCATTAGCTGGTCGGCGGGGTAACGGCTCACCGAGGCGACGATGCGTAGGGGTTCTGAGAGGAAGGCCCCCCACACTGGTACTGAGACACGGACCAG "Bacteria" "Bacteroidetes" "Bacteroidia" "Bacteroidales" "Muribaculaceae" NA NA
GATGAACGCTAGCTACAGGCTTAACACATGCAAGTCGAGGGGCAGCATGAACTTAGCTTGCTAAGTTTGATGGCGACCGGCGCACGGGTGAGTAACACGTATCCAACCTGCCGATGACTCGGGGATAGCCTTTCGAAAGAAAGATTAATACCCGATGGCATAGTTCTTCCGCATGGTAGAACTATTAAAGGATTTCGGTCATCGATGGGGATGCGTTCCATTAGGTTGTTGGCGGGGTAACGGCCCACCAAGCCTTCGATGGATAGGGGTTCTGAGAGGAAGGTCCCCCACATTGGAACTGAGACACGGTCCAA "Bacteria" "Bacteroidetes" "Bacteroidia" "Bacteroidales" "Bacteroidaceae" "Bacteroid…
GATGAACGCTGGCGGCGTGCTTAACACATGCAAGTCGAACGGGGATGCCATTTTTGAAGCGATTAGCTTGCTGAGAGTGGAAATGTTGGCATCTTAGTGGCGGACGGGTGAGTAACGCGTGGGGAACCTGCCCTGTACAGGGGGATAACACTTAGAAATAGGTGCTAATACCGCATAAGCGCACAGTATCGCATGATACAGTGTGAAAAACTCCGGTGGTACAGGATGGACCCGCGTCTGATTAGCTGGTTGGCGGGGTAACGGCCCACCAAGGCGACGATCAGTAGCCGGCCTGAGAGGGTGAACGGCCACATTGGGACTGAGACACGGCCCAA "Bacteria" "Firmicutes" "Clostridia" "Clostridiales" "Lachnospi…
GATGAACGCTGGCGGCGTGCCTAACACATGCAAGTCGAACGGAGTCATTAAGGAAAGCTCTTCGGAGTCGGAATTCTTGACTTAGTGGCGGACGGGTGAGTAACGCGTGAGCAATCTGCCTTTGGATGTGGGATAACAGCCGGAAACGGCTGCTAATACCGCATAACGCATTCTGGCCGCATGACCGGGATGCCAAAGATTTATCGTCCAAAGATGAGCTCGCGTCTGATTAGCTGGTTGGCGGGGTAACGGCCCACCAAGGCGACGATCAGTAGCCGGACTGAGAGGTTGAACGGCCACATTGGGACTGAGACACGGCCCAG "Bacteria" "Firmicutes" "Clostridia" "Clostridiales" "Ruminococcaceae" "But…
GATGAACGCTGGCGGCGTGCTTAACACATGCAAGTCGAACGGAGATGTTGCAGCAGAAGCGAATAGCTTGCTATGAGTGGAAACAGTGGCATCTTAGTGGCGGACGGGTGAGTAACGCGTGGGCAACCTGCCCTGCACTGGGGGATAACACTTAGAAATAGGTGCTAATACCGCATAATAAAATATATTGCATGATATATTTTTGAAAGCTGCGGCGGTGCAGGATGGGCCCGCGTCTGATTAGCCAGTTGGCGGGGTAACGGCCCACCAAAGCGACGATCAGTAGCCGGCCTGAGAGGGTGGACGGCCACATTGGGACTGAGACACGGCCCAA "Bacteria" "Firmicutes" "Clostridia" "Clostridiales" "Lachnospir…
GATGAACGCTGGCGGCGTGCTTAACACATGCAAGTCGAACGAAGCAGGAAGCGAAGCGCAAGCAGAGGTTCTTGACTGAGTGGCGGACGGGTGAGTAACGCGTGGATAACCTGCCTTTCACAGGGGGATAACAGCTGGAAACGGCTGCTAATACCGCATGAGCCTCTTTTATCGCATGAGGAGAGAGGGAAAGAGAAATCGGTGAGAGATGGATCCGCGTCCGATTAGCTAGTTGGAGGGGTAACAGCCCACCAAGGCGACGATCGGTAGCCGACCTGAGAGGGTGGACGGCCACATTGGGACTGAGACACGGCCCAA "Bacteria" "Firmicutes" "Clostridia" "Clostridiales" "Lachnospiraceae" NA NA
GATGAACGCTGGCGGCGTGCCTAACACATGCAAGTCGAACGGAGCGGTGACGGGAAACCCCCTCGGGGGCGGAACGGCGCCGTCTCAGTGGCGGACGGGTGAGTAACGCGTGGGCAGCCTGCCCCGTACCGGGGGATAACAGCCGGAAACGGCTGCTAATACCGCATAAGCGCACGGGTGCCGCATGGCACTGTGTGAAAAACCACGGTGGTACGGGATGGGCCCGCGTCCGATTAGTTAGTTGGCGGGGTAACGGCCCGCCAAGACCGCGATCGGTAGCCGGCCTGAGAGGGCGGACGGCCACATTGGGACTGAGACACGGCCCAG "Bacteria" "Firmicutes" "Clostridia" "Clostridiales" "Lachnospiraceae" …
GATGAACGCTGGCGGCGTGCTTAACACATGCAAGTCGAACGGAGTATTAACTTTGAATTCTAACGGATGAAGAGTTGATACTTAGTGGCGGACGGGTGAGTAACGCGTGGATAACCTGCCCCATACCGGGGGATAACAGCCGGAAACGGCTGCTAATACCGCATAAGCGCACGGGAATGCATGTTTCTGTGTGAAAAACTCCGGTGGTATGGGATGGATCCGCGTCTGATTAGCTGGTTGGCGGGGTAGAGGCCCACCAAGGCGACGATCAGTAGCCGACCTGAGAGGGTGGCCGGCCACATTGGGACTGAGACACGGCCCAG "Bacteria" "Firmicutes" "Clostridia" "Clostridiales" "Lachnospiraceae" NA NA
GATGAACGCTGGCGGCGTGCTTAACACATGCAAGTCGAACGAAGCAGGAGGGTGCTTGCACCTTCCTGCTGAGTGGCGGACGGGTGAGTAACACGTGGATAATCTGCCCTGCACAGGGGGACAACAGCTAGAAATGGCTGCTAATACCGCATAAGCCTACAGCCTCGCATGAGGGAGCAGGAAAAGAAATTCGGTGCAGGATGAGTCCGCGTCTGATTAGCTAGTTGGAGGGGTAAAAGCCCACCAAGGCAACGATCAGTAGCCGGCCTGAGAGGGCGACCGGCCACATTGGGACTGAGACACGGCCCAA "Bacteria" "Firmicutes" "Clostridia" "Clostridiales" "Lachnospiraceae" NA NA
GATGAACGCTAGCGGCAGGCCTAACACATGCAAGTCGAGGGGCAGCATTTCGGTAGCAATATCGGAGATGGCGACCGGCGCACGGGTGCGTAACGCGTATGTAACCTACCTTAAACAGGGGGATAACACTGAGAAATCGGTACTAATACCCCATAATACTATTGGAGGCATCTCCGATAGTTGAAAGTTCCGGCGGTTTAAGATGGACATGCGTTGTATTAGTTAGTTGGTGAGGTAACGGCTCACCAAGGCGACGATACATAGGGGGACTGAGAGGTTAACCCCCCACATTGGTACTGAGACACGGACCAA "Bacteria" "Bacteroidetes" "Bacteroidia" "Bacteroidales" "Rikenellaceae" "Alistipes" NA
GATGAACGCTGGCGGCGTGCTTAACACATGCAAGTCGAACGGAGTAAAGATTTTGATTTCTAACGATTGAGAGGTTTTTACTTAGTGGCGGACGGGTGAGTAACGCGTGGATAACCTGCCCCATACCGGGGGATAACAGCCGGAAACGGCTGCTAATACCGCATAAGCGCACGAGGCTGCATGGCCTTGTGTGAAAAACTCCGGTGGTATGGGATGGATCCGCGTCTGATTAGCTAGTTGGTGAGATAAAAGCCCACCAAGGCGACGATCAGTAGCCGACCTGAGAGGGTGGCCGGCCACATTGGGACTGAGACACGGCCCAG "Bacteria" "Firmicutes" "Clostridia" "Clostridiales" "Lachnospiraceae" NA NA
GATGAACGCTAGCTACAGGCTTAACACATGCAAGTCGAGGGGCAGCATGACCTAGCAATAGGTTGATGGCGACCGGCGCACGGGTGAGTAACACGTATCCAACCTGCCGATTATTCCGGGATAGCCTTTCGAAAGAAAGATTAATACTGGATAGCATAACGAGAAGGCATCTTCTTGTTATTAAAGAATTTCGATAATCGATGGGGATGCGTTCCATTAGTTTGTTGGCGGGGTAACGGCCCACCAAGACATCGATGGATAGGGGTTCTGAGAGGAAGGTCCCCCACATTGGAACTGAGACACGGTCCAA "Bacteria" "Bacteroidetes" "Bacteroidia" "Bacteroidales" "Bacteroidaceae" "Bacteroides" …
GATGAACGCTGGCGGCGTGCCTAACACATGCAAGTCGAGCGAAGCGATGTTAAGGAAGTTTTCGGATGGAATTAAGATTGACTTAGCGGCGGACGGGTGAGTAACGCGTGGGTAACCTGCCTTATACAGGGGGATAACAGTTAGAAATGACTGCTAATACCGCATAAGCGCACGGGAACGCATGTTTCTGTGTGAAAAACTGAGGTAGTATAAGATGGACCCGCGTCTGATTAGCTAGTTGGTGGGGTAACGGCCTACCAAGGCGACGATCAGTAGCCGGCCTGAGAGGGTGACCGGCCACATTGGGACTGAGACACGGCCCAA "Bacteria" "Firmicutes" "Clostridia" "Clostridiales" "Lachnospiraceae" NA …
GATGAACGCTGGCGGCATGCCTAAGACATGCAAGTCGAACGGAGTAGCCTTTTGAAAGTGGAGTGCTTGCACAAAACTAGATAAAGAATTCTACTTAGTGGCAGACGGGTGAGTAACACGTGGGTAATCTACCCTAGGGACTGGGATAACGTTTGGAAACGAACGCTAATACCGGATGATACATAACTAGATAACTAGATATGTTAAAAGAAGCGTTTGCTTCACCTTAGGATGAGCTTGCGGTGTATTAGCTAGTTGGTGGGGCAATGGCCTACCAAGGCAACGATGCATAGCCGAGCTGAGAGGCTGATCGGCCACATTGGAACTGAGATACGGTCCAA "Bacteria" "Tenericutes" "Mollicutes" "Mollicutes_RF39" N…
GATGAACGCTGGCGGCATGCCTAAGACATGCAAGTCGAACGAAGTAGTCCACGGAAGGAAGAGTACTTGTACAAATCTGGAAGTGGGTAGCTACTTAGTGGCGCAAGGGTGAGTAACACGTGGGTGATCTACCTTAGGGACTGGGATAACAGTTGGAAACGATTGCTAATACCGGATGATATATATACTGATACGTTAGTATATAGTAAAAGTAGCTTTCGGGCTACACCTTAAGATGAGCTTGCGGCGTATTAGCTAGTTGGTGGGGTAAAGGCCTACCAAGGCAACGATGCGTAGCCGACCTGAGAGGGTGAACGGCCACATTGGGACTGAGACACGGCCCAA "Bacteria" "Tenericutes" "Mollicutes" "Mollicutes_RF3…
GATGAACGCTGGCGGCGTGCCTAACACATGCAAGTCGAGCGGAGCAATCTTGATGAAGTTTTCGGATGGAATCAGGATTGACTTAGCGGCGGACGGGTGAGTAACACGTGGATAACCTGCCTTATACTGGGGGATAACAGCCAGAAATGGCTGCTAATACCGCATAAGCGCACGGCGCCGCATGGCGCAGTGTGAAAAACTCCGGTGGTATAAGATGGATCCGCGCCTGATTAGCTAGTTGGCGGGGCAGCGGCCCACCAAGGCGACGATCAGTAGCCGGCCTGAGAGGGCGACCGGCCACATTGGGACTGAGACACGGCCCAA "Bacteria" "Firmicutes" "Clostridia" "Clostridiales" "Lachnospiraceae" NA …
GACGAACGCTGGCGGCATGCCTAACACATGCAAGTCGAACGAGGATAGCAATATCCTAGTGGCGAACGGGTGAGTAACGCGTGAGCAACCTGCCTCATACAACGGGATACCCGAGGGAAACTTCGGTTAATACGGTATAAGACCACACTACCGCATGGTAGAGGGGTAAAAGGAGAAATCCGGTATGAGATGGGCTCGCGTCGCATTAGCTAGTTGGTGAGGTAACGGCCCACCAAGGCGACGATGCGTAGCCGACCTGAGAGGGTGATCGGCCACATTGGGACTGAGATACGGCCCAG "Bacteria" "Firmicutes" "Clostridia" "Clostridiales" "Clostridiales_vadinBB60_group" NA NA
GACGAACGCTGGCGGCGCGCCTAACACATGCAAGTCGAACGGAACGAATTTCTAGAAGTTTACGGATGGAAGGGAATAAGTTTAGTGGCGGACGGGTGAGTAACGCGTGAGTAACCTGCCTTTTAGAGGGGGATAACGTTTAGAAATGAACGCTAATACCGCATAACATATAAGTTTCGCATGGGACTGATATCAAAGGAGAAATCCGCTAAAAGATGGACTCGCGTCCAATTAGCTAGTTGGTAGGGTAAAGGCCTACCAAGGCGACGATTGGTAGCCGGACTGAGAGGTTGACCGGCCACATTGGGACTGAGACACGGCCCAG "Bacteria" "Firmicutes" "Clostridia" "Clostridiales" "Ruminococcaceae" NA…
GATGAACGCTGGCGGCGTGCCTAACACATGCAAGTCGAGCGGGGGTTATTGAGAGCTTGCTTTCAATAACCTTAGCGGCGGACGGGTGAGGAACACGTGGGTAATCTGCCCTTTGCAGAGGGATAACGTCAAGAAATTGACGCTAATACCTCATAAGCTCCCGGCACGGCATCGTGGCGAGAGAAAAGATTTATCGGCAAAGGAGGAGCCCGCGGCTGATTAGCTAGTTGGGGAGGTAACGGCTCACCAAGGCGACGATCAGTAGCCGACCTGAGAGGGTGATCGGCCACATTGGAACTGAGACACGGTCCAA "Bacteria" "Firmicutes" "Clostridia" "Clostridiales" "Lachnospiraceae" "Tyzzerella_3"…
GATGAACGCTGGCGGCGTGCTTAACACATGCAAGTCGAACGGAGTATGAATTTGGATTTTTCACGATTGAAGAGTTCATACTTAGTGGCGGACGGGTGAGTAACGCGTGGATAACCTGCCCCATACCGGGGGATAACAGCCGGAAACGGCTGCTAATACCGCATAAGCGCACGAGGCTGCATGGCCTTGTGTGAAAAACTCCGGTGGTATGGGATGGATCCGCGTCTGATTAGCTAGTTGGTGAGATAAAAGCCCACCAAGGCGACGATCAGTAGCCGACCTGAGAGGGTGGCCGGCCACATTGGGACTGAGACACGGCCCAG "Bacteria" "Firmicutes" "Clostridia" "Clostridiales" "Lachnospiraceae" NA NA
GACGAACGCTGGCGGCGTGCTTAACACATGCAAGTCGAACGGAGCACCCTTGAAGGAGTTTTCGGACAACGGATAGGAATGCTTAGTGGCGGACTGGTGAGTAACGCGTGAGGAACCTGCCTTTCGGAGGGGGACAACAGTTGGAAACGACTGCTAATACCGCATGATACATTTGGATCGCATGGTCTGAATGTCAAAGATTTATCGCCGAAAGATGGCCTCGCGTCTGATTAGCTAGTTGGTGAGGTAATGGCCCACCAAGGCGACGATCAGTAGCCGGACTGAGAGGTTGGCCGGCCACATTGGGACTGAGATACGGCCCAG "Bacteria" "Firmicutes" "Clostridia" "Clostridiales" "Ruminococcaceae" "Os…
GATGAACGCTAGCGGCAGGCTTAACACATGCAAGTCGAGGGGCAGCATATGAGTAGCAATACTTATGATGGCGACCGGCGCACGGGTGCGTAACGCGTATGCAACCTACCTTTTACAGGGGCATAACACTGAGAAATTGGTACTAATTCCCCATAATATCTGAGACGGCATCGTTTTGGGTTGAAAACTCCGGTGGTAAAAGATGGGCATGCGTTGTATTAGCTAGTTGGTGAGGTAACGGCTCACCAAGGCGACGATACATAGGGGGACTGAGAGGTTAACCCCCCACATTGGTACTGAGACACGGACCAA "Bacteria" "Bacteroidetes" "Bacteroidia" "Bacteroidales" "Rikenellaceae" "Alistipes" NA
GATGAACGCTGGCGGCGTGCTTAACACATGCAAGTCGAGCGAAGCATACAGAGGGAAGTTTTCGGATGGAACTGTGTATGACTGAGCGGCGGACGGGTGAGTAACGCGTGGGTAACCTGCCTCATACAGGGGGATAACAGCTAGAAATGGCTGCTAATACCGCATAAGCGCACAGGGACGCATGTCCTGGTGCGAAAAACTCCGGTGGTATGAGATGGACCCGCGTCTGATTAGCTGGTTGGCGGGGTAAGGGCCCACCAAGGCGACGATCAGTAGCCGACCTGAGAGGGTGAGCGGCCACATTGGGACTGAGACACGGCCCAA "Bacteria" "Firmicutes" "Clostridia" "Clostridiales" "Lachnospiraceae" NA …
GATGAACGCTGGCGGCGTGCCTAACACATGCAAGTCGAACGGGAACAGAATGAAACCTAGTGATTTTTGTTTTAGTGGCGGACGGGTGAGTAACGCGTGGGTAACCTGCCGTATACAGGGGGATAACACTTAGAAATAGGTGCTAATACCGCATAAGCGCACAGCTTCGCATGGAGCAGTGTGAAAAGCGTAAACGGTATACGATGGACCCGCGTCTGATTAGCTAGTTGGCGGGGTAGAGGCCCACCAAGGCGACGATCAGTAGCCGGCCTGAGAGGGTGACCGGCCACATTGGGACTGAGACACGGCCCAA "Bacteria" "Firmicutes" "Clostridia" "Clostridiales" "Lachnospiraceae" "Lachnospirace…
GACGAACGCTGGCGGCGTGCTTAACACATGCAAGTCGAACGGAGCGCCCCTGAAAGAGTTTTCGGACAATGGAAGGGAACGCTTAGTGGCGGACTGGTGAGTAACGCGTGAGGAACCTGCCTTTCGGAGGGGGACAACAGTTGGAAACGACTGCTAATACCGCATGACACATGACTGTGGCATCGCAGACATGTCAAAGATTTTATCGCCGAAAGATGGCCTCGCGTCTGATTAGCTAGTTGGTGAGGTAATGGCTCACCAAGGCAACGATCAGTAGCCGGACTGAGAGGTTGGCCGGCCACATTGGGACTGAGATACGGCCCAG "Bacteria" "Firmicutes" "Clostridia" "Clostridiales" "Ruminococcaceae" "O…
GACGAACGCTGGCGGCGCGCCTAACACATGCAAGTCGAACGGGACCATTTTAGAGTTTACTTTGGGATGGTTTAGTGGCGGACGGGTGAGTAACACGTGAGCAACCTACCTTTCAGAGGGGGATAACAGTTGGAAACGACTGCTAATACCGCATAACGTTGTAAAAGGGCATCCATTTACAACCAAAAGAGAAATCTGCTGAAAGATGGGCTCGCGGCCGATTAGATAGTAGGCGGGGTAACGGCCCACCTAGTCAACGATCGGTAGCCGGACTGAGAGGTTGAACGGCCACATTGGGACTGAGACACGGCCCAG "Bacteria" "Firmicutes" "Clostridia" "Clostridiales" "Ruminococcaceae" "Anaerotrunc…
GATAAACGCTGGCGGCGCACATAAGACATGCAAGTCGAACGAACTTAACTCATTCTTTTAGATTGAGAGCGGTTAGTGGCGGACTGGTGAGTAACACGTAAGCAACCTGCCTATCAGAGGGGAATAACAGTGAGAAATCATTGCTAATACCGCATAAGCTAGTAATATCGCATGATATAGCTAGAAAAGGAGTAATCCGCTGATAGATGGGCTTGCGTCTGATTAGCTAGTTGGTGGGGTAACGGCCTACCAAGGCGACGATCAGTAGCCGAACTGAGAGGTTGAACGGCCACATTGGGACTGAGATACGGCCCAG "Bacteria" "Firmicutes" "Clostridia" "Clostridiales" "Ruminococcaceae" "Ruminococc…
GACGAACGCTGGCGGCATGCCTAACACATGCAAGTCGAACGAGGATAGCAATATCCTAGTGGCGAACGGGTGAGTAACGCGTGAGCAACCTGCCTCATACAACGGGATACCCGAGGGAAACTTCGGTTAATACGGTATAAGACCACACTGCCGCATGGCAGAGGGGTAAAAGGAGAAATCCGGTATGAGATGGGCTCGCGTCGCATTAGCTAGTTGGTGAGGTAACGGCCCACCAAGGCGACGATGCGTAGCCGACCTGAGAGGGTGATCGGCCACATTGGGACTGAGATACGGCCCAG "Bacteria" "Firmicutes" "Clostridia" "Clostridiales" "Clostridiales_vadinBB60_group" NA NA
GATGAACGCTGGCGGCATGCCTAAGACATGCAAGTCGAACGAAGTAGTCCACAGAAGAAAGAGTACTTGTACGAATTTGGAAGTGGGTAGCTACTTAGTGGCGCAAGGGTGAGTAACACGTGGGTGATCTACCTTAGGGACTGGGATAACAGTTGGAAACGATTGCTAATACCGGATGATATATATACTGATACGTTAGTATATAGTAAAAGTAGCTTTCGGGCTACACCTTAAGATGAGCTTGCGGCGTATTAGCTAGTTGGTGGGGTAAAGGCCTACCAAGGCAACGATGCGTAGCCGACCTGAGAGGGTGAACGGCCACATTGGGACTGAGACACGGCCCAA "Bacteria" "Tenericutes" "Mollicutes" "Mollicutes_RF3…
GATGAACGCTGGCGGCGTGCTTAACACATGCAAGTCGAACGGACATATACCGAAACCTAGTGAAGTATATGTTAGTGGCGGACGGGTGAGTAACGCGTGGATAACCTGCCGTGCACAGGGGGATAACACTTAGAAATAGGTGCTAATACCGCATAAGCGCACAGTTTCGCATGAGACAGTGTGAAAAGCCTGGAAGCGATTCCTGGCGGTGCATGATGGATCCGCGTCCGATTAGCTAGTTGGCGGGGTAAAGGCCCACCAAGGCAGCGATCGGTAGCCGGCCTGAGAGGGTGGACGGCCACATTGGGACTGAGACACGGCCCAA "Bacteria" "Firmicutes" "Clostridia" "Clostridiales" "Lachnospiraceae" "L…
GATGAACGCTGGCGGCGTGCTTAACACATGCAAGTCGAACGAAGCGATCAGGAGGAAGTTTTCGGATGGAATCCGGATTGACTGAGTGGCGGACGGGTGAGTAACGCGTGGGTAACCTGCCTCATACAGGGGGATAACAGTTAGAAATGACTGCTAATACCGCATAAGCGCACAGGGACACATGTTCCGGTGTGAAAAACTCCGGTGGTATGAGATGGACCCGCGTCTGATTAGCTGGTTGGCGGGGTAACGGCCCACCAAGGCGACGATCAGTAGCCGACCTGAGAGGGTGACCGGCCACATTGGGACTGAGACACGGCCCAA "Bacteria" "Firmicutes" "Clostridia" "Clostridiales" "Lachnospiraceae" NA …
GATGAACGCTGGCGGCGTGCTTAACACATGCAAGTCGAACGGAACACCCTTGAAGGAGTTTTCGGACAACTGAGAGGACTGTTTAGTGGCGGACGGGTGAGTAACGCGTGAGTAACCTGCCTTGGAGTGGGGAATAACACAAAGAAATTTGTGCTAATACCGCATAATGCAGCTGAGTCGCATGGCTCTGGCTGCCAAAGATTTATCGCTCTGAGATGGACTCGCGTCTGATTAGCTAGTTGGCGGGGTAACGGCCCACCAAGGCGACGATCAGTAGCCGGACTGAGAGGTTGGCCGGCCACATTGGGACTGAGACACGGCCCAG "Bacteria" "Firmicutes" "Clostridia" "Clostridiales" "Ruminococcaceae" "R…
GATGAACGCTGGCGGCGTGCTTAACACATGCAAGTCGAGCGAAAATAATTAGGAGCTTGCTTTTAATTATTTTAGCGGCGGACGGGTGAGTAACGTGTGGGCAACCTGCCTTTTACTGGGGAATAATCACTGGAAACGGTGACTAATACCGCATAATATTCTTGGAAGGCATCTTCCGAGAAGGAAAGGAAATATTCGGTAAAAGATGGGCCCGCATCTGATTAGCTAGTTGGTGAGATAACAGCCCACCAAGGCGACGATCAGTAGCCGACCTGAGAGGGTGACCGGCCACATTGGGACTGAGACACGGCCCAA "Bacteria" "Firmicutes" "Clostridia" "Clostridiales" "Lachnospiraceae" "ASF356" NA
GATAAACGCTGGCGGCGCACATAAGACATGCAAGTCGAACGGAAGTCGTTATAAAATGAATTGAAGATTTATCTGATTGAAATTTTATAACAATGGCTTTAGTGGCGGACTGGTGAGTAACGCGTGAGCAACCTGCCTATTAGAGGGGAATAACAGTGAGAAATCATTGCTAATACCGCATATGCCATAATTATCACATGATAATAGTGGGAAAGGAGTAATCCGCTAATAGATGGGCTCGCGTCTGATTAGATAGTTGGTGGGGTAACGGCCTACCAAGTCAACGATCAGTAGCCGGACTGAGAGGTTGAACGGCCACATTGGGACTGAGATACGGCCCAG "Bacteria" "Firmicutes" "Clostridia" "Clostridiales" "Ru…
GATGAACGCTGGCGGCGTGCCTAACACATGCAAGTCGAACGGGGGCGGATTGAAACCTAGTGATATCCGCCCGAGTGGCGGACGGGTGAGTAACGCGTGGACAACCTGCCGCATGCAGGGGGATACCGGCTGGAAACAGCCGCTAATACCGCATATGCGCACGAGGGCCGCATGGCCCGGTGCGGAAAGGATGCAAATCCGGCATGCGATGGGTCCGCGTCCGATTAGCTGGTTGGCGGGGCAGCGGCCCACCAAGGCGACGATCGGTAGCCGGCCTGAGAGGGCGGACGGCCACATTGGGACTGAGACACGGCCCAG "Bacteria" "Firmicutes" "Clostridia" "Clostridiales" "Lachnospiraceae" NA NA
GACGAACGCTGGCGGCGTGCTTAACACATGCAAGTCGAACGGAGCACCCCAGAAGGAGTTTTCGGACAACGGATGGGAATGCTTAGTGGCGGACTGGTGAGTAACGCGTGAGGAACCTGCCTTCCAGAGGGGGACAACAGTTGGAAACGACTGCTAATACCGCATGATGCGTTGGAGCCGCATGACTCCGACGTCAAAGATTTATCGCTGGAAGATGGCCTCGCGTCTGATTAGCTAGTTGGTGAGGTAACGGCCCACCAAGGCGACGATCAGTAGCCGGACTGAGAGGTTGGCCGGCCACATTGGGACTGAGATACGGCCCAG "Bacteria" "Firmicutes" "Clostridia" "Clostridiales" "Ruminococcaceae" "Os…
GATGAACGCTGGCGGCGTGCCTAACACATGCAAGTCGAACGAAGCGCTCGGACGGAGTCTCTTCGGAGAGGAAGGCCGGGCGACTGAGTGGCGGACGGGTGAGTAACGCGTGGGCAACCTGCCCTGCACAGGGGGACAACAGCCGGAAACGGCTGCTAATACCGCATAAGCGCACAGCTTCGCATGAAGCGGTGCGAAAAGCTTTGGCGGTGCAGGATGGGCCCGCGTCTGATTAGCTTGTTGGCGGGGCAACGGCCCACCAAGGCGACGATCAGTAGCCGGCCTGAGAGGGTGGACGGCCACATTGGGACTGAGACACGGCCCAG "Bacteria" "Firmicutes" "Clostridia" "Clostridiales" "Lachnospiraceae" "…
GATGAACGCTGGCGGCGTGCTTAACACATGCAAGTCGAGCGAAGCATACAGAGGGAAGTTTTCGGATGGAACTGTGTATGACTGAGCGGCGGACGGGTGAGTAACGCGTGGGTAACCTGCCTCATACAGGGGGATAACAGCTAGAAATGGCTGCTAATACCGCATAAGCGCACAGGGACGCATGTCCTGGTGCGAAAAACTCCGGTGGTATGAGATGGACCCGCGTCTGATTAGCTGGTTGGCGGGGTAAGGGCCCACCAAGGCGACGATCAGTAGCCGACCTGAGAGGGTGAACGGCCACATTGGGACTGAGACACGGCCCAA "Bacteria" "Firmicutes" "Clostridia" "Clostridiales" "Lachnospiraceae" NA …
GACGAACGCTGGCGGCGTGCTTAACACATGCAAGTCGAACGGAGCACCCTTGAAGGAGTTTTCGGACAACGGATAGGAATGCTTAGTGGCGGACTGGTGAGTAACGCGTGAGGAACCTGCCTTCCAGAGGGGGACAACAGTTGGAAACGACTGCTAATACCGCATGACGCATTTGAATCGCATGGTTTGAATGTCAAAGATTTATCGCTGGAAGATGGCCTCGCGTCTGATTAGCTAGTTGGTGAGGTAACGGCCCACCAAGGCGACGATCAGTAGCCGGACTGAGAGGTTGGCCGGCCACATTGGGACTGAGATACGGCCCAG "Bacteria" "Firmicutes" "Clostridia" "Clostridiales" "Ruminococcaceae" "Os…
GATGAACGCTGGCGGCGTGCTTAACACATGCAAGTCGAACGAAGCAGGAGGGTGCTTGCACCTTCTTGACTGAGTGGCGGACGGGTGAGTAACACGTGGATAATCTGCCCTGCACAGGGGGACAACAGCTAGAAATGGCTGCTAATACCGCATAAGCCTACAGCCTCGCATGAGGGAGTAGGAAAAGAAATTCGGTGCAGGATGAGTCCGCGTCTGATTAGCTAGTTGGAGGGGTAAAAGCCCACCAAGGCAACGATCAGTAGCCGGCCTGAGAGGGCGACCGGCCACATTGGGACTGAGACACGGCCCAA "Bacteria" "Firmicutes" "Clostridia" "Clostridiales" "Lachnospiraceae" NA NA
GATGAACGCTAGCGGCAGGCTTAACACATGCAAGTCGAAGGGCAGCGGGGAGAGTGCTTGCACTCTCTGCCGGCGACTGGCGCACGGGTGAGTAACACGTATGCAACCTGCCCTCCACAGGGGGACAACCTTCCGAAAGGGAGGCTAATCCCGCGTATATCCCCCGGGGGCATCCCCGGGGGAGGAAAGGATTACCGGTGGAGGATGGGCATGCGGCGCATTAGGCAGTAGGCGGGGTAACGGCCCACCTAACCGACGATGCGTAGGGGTTCTGAGAGGAAGGTCCCCCACACTGGTACTGAGACACGGACCAG "Bacteria" "Bacteroidetes" "Bacteroidia" "Bacteroidales" "Muribaculaceae" NA NA
AACGAACGTTAGCGGCGCGCCTAACACATGCAAGTCGTACGAGAAAGGGCTTCGGCCCCGGTAAAGTGGCGCACGGGTGAGTAACACGTGGGTAATCTTCCCTTGAGCGGTGGATAACATTCCGAAAGGAGTGCTAATACAGCATAAGACCACGACCTCGAAAGGGGTTGAGGTAAAAGACGGCCTCTATATATAAGCTGTCACTTGGGGATGAGCCCGCGGCCCATCAGCTAGTTGGTAGGGTAATGGCCTACCAAGGCGAAGACGGGTAGCTGGTCTGAGAGGATGATCAGCCACACTGGAACTGAGACACGGTCCAG "Bacteria" "Proteobacteria" "Deltaproteobacteria" "Myxococcales" NA NA NA
GATGAACGCTGGCGGCGTGCCTAACACATGCAAGTCGAGCGAAGCATACAGGAGGAAGTTTTCGGATGGAATCCTGCATGACTGAGCGGCGGACGGGTGAGTAACGCGTGGGTAACCTGCCTTATACAGGGGGATAACAGTTAGAAATGACTGCTAATACCGCATAAGCGCACAGTACCGCATGGTAGTGTGTGAAAAACTCCGGTGGTATAAGATGGACCCGCGTCTGATTAGCCAGTTGGCGGGGTAACGGCCCACCAAAGCGACGATCAGTAGCCGACCTGAGAGGGTGACCGGCCACATTGGGACTGAGACACGGCCCAA "Bacteria" "Firmicutes" "Clostridia" "Clostridiales" "Lachnospiraceae" "La…
GATGAACGCTGGCGGCGTGCTTAACACATGCAAGTCGAGCGGAGCACATCATTGGAATCCTTCGGGAGGAAGAGGATGTGGCTTAGCGGCGGACGGGTGAGTAACGCGTGGACAACCTGCCCTATGCAGGGGGATAACATCCGGAAACGGGTGCTAATACCGCATAAGCGCACAGTACCGCATGGTACAGTGTGAAAAGCTGAGGCGGCATAGGATGGGTCCGCGTTGGATTAGGCAGTTGGCGGGGTAACGGCCCACCAAACCGACGATCCATAGCCGGCCTGAGAGGGTGGACGGCCACATTGGGACTGAGACACGGCCCAG "Bacteria" "Firmicutes" "Clostridia" "Clostridiales" "Lachnospiraceae" NA …
GACGAACGCTGGCGGCGTGCTTAACACATGCAAGTCGAGCGGAGTATGAGAGCTTGCTCTTATACTTAGCGGCGGACGGGTGAGTAACGCGTGAGCAACCTGCCTTCAACTACGGGATAACACTTAGAAATAGGTGCTAATACCGTATAAGACCACACTCGGGCATCCGAGAGGGGTAAAAGAATTTCGGTTGAAGATGGGCTCGCGTCCCATTAGCTAGTTGGTGAGGTAACGGCCCACCAAGGCTATGATGGGTAGCCGACCTGAGAGGGTGATCGGCCACATTGGAACTGAGAACGGTCCAA "Bacteria" "Firmicutes" "Clostridia" "Clostridiales" "Clostridiales_vadinBB60_group" NA NA
GACGAACGCTGGCGGCGCGCCTAACACATGCAAGTCGAACGGAGTTTAGAGAGCTTGCTTTTTAAACTTAGTGGCGGACGGGTGAGTAACACGTGAGTAACCTACCTTTCAAAGGGGGATAACGTCTGGAAACGGACGCTAATACCGCATAATACTATTTGAGGGCATCCTTGGATAGTCAAAGGAGAAATCCGATGGGAGATGGACTCGCGGCTGATTAGATAGTTGGCGGGGTAGAGGCCCACCAAGTCGACGATCAGTAGCCGGACTGAGAGGTTGAACGGCCACATTGGGACTGAGACACGGCCCAG "Bacteria" "Firmicutes" "Clostridia" "Clostridiales" "Ruminococcaceae" NA NA
GACGAACGCTGGCGGCGCGCCTAACACATGCAAGTCGAACGGGACTATCCCGGAAGAAGTTTTCGGATGGATTTTGGGATAGTTTAGTGGCGGACGGGTGAGTAACACGTGAGCAACCTGCCTTCGAGAGGGGAATAACGGCTGGAAACGGTCGCTAATACCGCATAACGTACGGATGGGACATCCTGTCTGTACCAAAGATTTATCGCTCGAAGATGGGCTCGCGTCCGATTAGGTAGTTGGTGAGGTAACGGCCCACCAAGCCGACGATCGGTAGCCGGACTGAGAGGTTGAACGGCCACATTGGGACTGAGACACGGCCCAG "Bacteria" "Firmicutes" "Clostridia" "Clostridiales" "Ruminococcaceae" NA…
GATGAACGCTGGCGGCGTGCTTAACACATGCAAGTCGAATGTAGCAATACATGGCGGACGGGTGAGTAACGCGTGAGCAATCTGCCCATGTCTGGGGGATAACAGTTGGAAACGACTGATAATACCGCATAATATGGTTTGAAGGCATCTTCTTACCATCAAAGATTTATCGGATATGGATGAGCTCGCGTCTGATTAGCTAGTTGGTGAGGTAACGGCTCACCAAGGCGACGATCAGTAGCCGACCTGAGAGGGTGATCGGCCACATTGGAACTGAGACACGGTCCAA "Bacteria" "Firmicutes" "Clostridia" "Clostridiales" "Clostridiales_vadinBB60_group" NA NA
ATTGAACGCTGGCGGCATGCCTTACACATGCAAGTCGAACGGTAACAGGTCTTTCGGGATGCTGACGAGTGGCGAACGGGTGAGTAATACATCGGAACGTGCCTAGTAGTGGGGGATAACTACTCGAAAGAGTGGCTAATACCGCATGAGATCTATGGATGAAAGCAGGGGACCTTCGGGCCTTGTGCTACTAGAGCGGCCGATGGCAGATTAGGTAGTTGGTGGGATAAAAGCTTACCAAGCCTACGATCTGTAGCTGGTCTGAGAGGACGATCAGCCACACTGGGACTGAGACACGGCCCAG "Bacteria" "Proteobacteria" "Gammaproteobacteria" "Betaproteobacteriales" "Burkholderiaceae" "…
GATGAACGCTGGCGGCGTGCCTAACACATGCAAGTCGAACGGACTTATAATGAAACCTAGTGAATTATAAGTTAGTGGCGGACGGGTGAGTAACGCGTGGAAAACCTGCCGTATACTGGGGGATAACACTTAGAAATAGGTGCTAATACCGCATAAGCGCACAGCTTCGCATGAAGCAGTGTGAAAAACTCCGGTGGTATACGATGGTTCCGCGTCTGATTAGCTAGTTGGTGAGGTAAAAGCCCACCAAGGCAACGATCAGTAGCCGGCCTGAGAGGGTGAACGGCCACATTGGGACTGAGACACGGCCCAG "Bacteria" "Firmicutes" "Clostridia" "Clostridiales" "Lachnospiraceae" "Lachnospirace…
GATAAACGCTGGCGGCGCACATAAGACATGCAAGTCGAACGGACTTAACCATTAGTTTACTATTGGAGCGGTTAGTGGCGGACTGGTGAGTAACACGTAAGCAACCTGCCTATCAGAGGGGAACAACAGTTAGAAATGACTGCTAATACCGCATATGCCTTAGTATCGCATGGTACAAAAGGGAAAGGAGCAATCCGCTGATAGATGGGCTTGCGTCTGATTAGCTAGTTGGTGGGGTAAAGGCCTACCAAGGCGACGATCAGTAGCCGGACTGAGAGGTTGAACGGCCACATTGGGACTGAGATACGGCCCAG "Bacteria" "Firmicutes" "Clostridia" "Clostridiales" "Ruminococcaceae" "Ruminococcac…
GATGAACGCTGGCGGCGTGCTTAACACATGCAAGTCGAGCGAAGCACTTTTTTAGAACTCTTCGGAGGGAAGAGAGGGTGACTTAGCGGCGGACGGGTGAGTAACGCGTGGGCAACCTGCCTTACACAGGGGGATAACAATTAGAAATGATTGCTAATACCGCATAAGACCCCAGTACCGCATGGTACAGGGGTAAAAACTGAGGTGGTGTAAGATGGGCCCGCGTCTGATTAGGTAGTTGGTGGGGTAGAAGCCTACCAAGCCGACGATCAGTAGCCGACCTGAGAGGGCGACCGGCCACATTGGGACTGAGACACGGCCCAA "Bacteria" "Firmicutes" "Clostridia" "Clostridiales" "Lachnospiraceae" "La…
GACGAACGCTGGCGGCGCGCCTAACACATGCAAGTCGAACGGGAGATTTCCTTCGGGAAAGATCTAGTGGCGGACGGGTGAGTAACACGTGAGCAATCTGCCTTTGGGAGGGGGATAACGTCTGGAAACGGACGCTAATACCGCATAATGTATGGTTTTCGCATGGGAAGCATACCAAAGATTTATCGCCCAAAGATGAGCTCGCGGCTGATTAGCTAGTTGGCGGGGTAAAGGCCCACCAAGGCGACGATCAGTAGCCGGACTGAGAGGTTGAACGGCCACATTGGGACTGAGACACGGCCCAG "Bacteria" "Firmicutes" "Clostridia" "Clostridiales" "Ruminococcaceae" "Harryflintia" NA
GATGAACGCTAGCGACAGGCTTAACACATGCAAGTCGAGGGGCAGCACGGTGTAGCAATACATTGGTGGCGACCGGCGCACGGGTGAGTAACGCGTATGCAACCTACCTATCAGAGGGGAATAACCCGGCGAAAGTCGGACTAATACCGCATAAAACAGGGGTTCCACATGGAAATATTTGTTAAAGAATTATCGCTGATAGATGGGCATGCGTTCCATTAGATAGTTGGTGAGGTAACGGCTCACCAAGTCCACGATGGATAGGGGTTCTGAGAGGAAGGTCCCCCACACTGGTACTGAGACACGGACCAG "Bacteria" "Bacteroidetes" "Bacteroidia" "Bacteroidales" "Tannerellaceae" "Parabactero…
GATGAACGCTAGCGGCAGGCTTAACACATGCAAGTCGAAGGGCAACGGGGAGAGTGCTTGCACTCTCTGCCGGCGACTGGCGCACGGGTGAGTAACACGTATGCAACCTGCCCTCCACAGGGGGACAACCTTCCGAAAGGGAGGCTAATCCCGCGTATATCCCTTGGGGGCATCCCCGGGGGAGGAAAGGATTACCGGTGGAGGATGGGCATGCGGCGCATTAGGCAGTAGGCGGGGTAACGGCCCACCTAACCGACGATGCGTAGGGGTTCTGAGAGGAAGGTCCCCCACACTGGTACTGAGACACGGACCAG "Bacteria" "Bacteroidetes" "Bacteroidia" "Bacteroidales" "Muribaculaceae" NA NA
GATGAACGCTGGCGGCGTGCTTAACACATGCAAGTCGAACGAAGCACTGAAAGCAGATTACTTCGGTAAGAAGCTTTCTTTGACTGAGTGGCGGACGGGTGAGTAACGCGTGGGTAACCTGCCTCATACAGGGGGATAACAGTTAGAAATGACTGCTAATACCGCATAAGCGCACGGGACTGCATGGTCTTGTGTGAAAAACTCCGGTGGTATGAGATGGACCCGCGTCTGATTAGCTTGTTGGTGAGGTAACGGCCCACCAAGGCGACGATCAGTAGCCGGCCTGAGAGGGTGAACGGCCACATTGGGACTGAGACACGGCCCAA "Bacteria" "Firmicutes" "Clostridia" "Clostridiales" "Lachnospiraceae" "…
GATTAACGCTGGCGGCATGCCTAAGACATGCAAGTCGAACGAAGTGCCCCACTGAAATCCGAATGAAGTTTGCGAGCTTGCTCAAAAATGGAATGACGATGGATGTGGATTCTGCACTTAGTGGCGAACGGGTGAGTAACACGTGGGTTACCTGCCTCTAAGTTGGGGACAACAGTTGGAAACGGCTGCTAATACCGAATGTGATAGAAATATTAAAGGAGCCTTTAAAGCTTCGCTTAGAGATGGGCCTGCGGCGTATTAGCTTGTTGGTGGGGTAATGGCCTACCAAGGCGACGATGCGTAGCCGGACTGAGAGGTTGAACGGCCACACTGGGACTGAGACACGGCCCAG "Bacteria" "Tenericutes" "Mollicutes" "Mollicu…
GATGAACGCTGGCGGCGTGCTTAACACATGCAAGTCGAACGGACTCATATTGAAACCTAGTGATATATGAGTTAGTGGCGGACGGGTGAGTAACGCGTGGAGAACCTGCCGTATACTGGGGGATAACACTTAGAAATAGGTGCTAATACCGCATAAGCGCACAGCTTCGCATGAAGCAGTGTGAAAAACTCCGGTGGTATACGATGGATCCGCGTCTGATTAGCTGGTTGGCGGGGTAAAGGCCCACCAAGGCGACGATCAGTAGCCGGCCTGAGAGGGTGAACGGCCACATTGGGACTGAGACACGGCCCAA "Bacteria" "Firmicutes" "Clostridia" "Clostridiales" "Lachnospiraceae" "Lachnospirace…
GATGAACGCTAGCGGCAGGCTTAACACATGCAAGTCGGGCGGCAGCGGGGTGGGAGCTTGCTCCCACTGCCGGCGAGCGGCGCACGGGTGAGTAACACGTATGCAACCTGCCCCTGTCAGGGGGACAACCCGCCGAAAGGCGGGCTAAACCCGCGTATATCTCCCCGGGGCATCCCGGGGGGAGGAAAGGAGCGATCCGGACAGGGATGGGCATGCGGCGCATTAGCTGGTCGGCGGGGTAACGGCCCACCGAGGCGACGATGCGTAGGGGTTCTGAGAGGAAGGCCCCCCACACTGGTACTGAGACACGGACCAG "Bacteria" "Bacteroidetes" "Bacteroidia" "Bacteroidales" "Muribaculaceae" NA NA
GATGAACGCTGGCGGCGTGCTTAACACATGCAAGTCGAACGGAGGACCCTTGACAGAGTTTTCGGACGATGGAGAGGAATCCTTAGTGGCGGACGGGTGAGTAACGCGTGAGCAATCTACCTTGGAGTGGGGAATAACACAGTGAAAACTGTGCTAATACCGCATAATACAACTGTGTCGCATGGCAGTGGTTGTCAAAGATTTATCGCTCTGAGATGAGCTCGCGTCTGATTAGCTAGTAGGCGGGGTAAAGGCCCACCTAGGCGACGATCAGTAGCCGGACTGAGAGGTTGGCCGGCCACATTGGGACTGAGACACGGCCCAG "Bacteria" "Firmicutes" "Clostridia" "Clostridiales" "Ruminococcaceae" NA…
GATGAACGCTGGCGGCGTGCCTAACACATGCAAGTCGAACGGGGATATATTGGAATGAGGATTCGTCTGAAGGAAAATGTATCTTAGTGGCGGACGGGTGAGTAACGCGTGGGCAACCTACCGTATACAGGGGGATAACACTTAGAAATAGGTGCTAATACCGCATAAGCGCACAGCAGTGCATACTGGAGTGTGAAAAGCCGAGACGGTATACGATGGGCCCGCGTCTGATTAGCCAGTTGGCAGGGTAACGGCCTACCAAAGCGACGATCAGTAGCCGGCCTGAGAGGGCGGACGGCCACATTGGGACTGAGACACGGCCCAG "Bacteria" "Firmicutes" "Clostridia" "Clostridiales" "Lachnospiraceae" NA…
GATGAACGCTGGCGGTGTGCTTAACACATGCAAGTCGAACGAAGCAGGAGGGTGCTTGCACCTTCCTGACTGAGTGGCGGACGGGTGAGTAACACGTGGATAATCTGCCCTGCACAGGGGGACAACAGCTAGAAATGGCTGCTAATACCGCATAAGCCTACAGCCTCGCATGAGGGAGTAGGAAAAGAAATTCGGTGCAGGATGAGTCCGCGTCTGATTAGCTAGTTGGAGGGGTAAAAGCCCACCAAGGCAACGATCAGTAGCCGGCCTGAGAGGGCGACCGGCCACATTGGGACTGAGACACGGCCCAA "Bacteria" "Firmicutes" "Clostridia" "Clostridiales" "Lachnospiraceae" NA NA
GATGAACGCTGGCGGCGTGCCTAACACATGCAAGTCGAACGGGGCACGCCCGTGGAAGCCCTCCGGGGCGGACATGGGCGCTGCCCAGTGGCGGACGGGTGAGTAACGCGTGGGCAACCTGCCCTGCACTGGGGGACAACAGCCGGAAACGGCTGCTAATACCGCATATGCCTGCCGCCCCGCATGGGGCGGCGGGGAAAGCCCCGGCGGTGCAGGATGGGCCCGCGTCTGATTAGCTGGTTGGCGGGGCAACGGCCCACCAAGGCGACGATCAGTAGCCGGCCTGAGAGGGTGGGCGGCCACATTGGGACTGAGACACGGCCCAG "Bacteria" "Firmicutes" "Clostridia" "Clostridiales" "Lachnospiraceae" "…
GATGAACGCTAGCGACAGGCTTAACACATGCAAGTCGAGGGGCAGCGGGTAGATGAGCTTGCTCATTTATGCCGGCGACCGGCGCACGGGTGAGTAACACGTATGCAACCTGTCCGTCTCAGGGGGATAATCGTCGGAAACGGCGTCTAATACCCCGTATGAAGCTGGACGGCATCGTCTGGTTTTGAAAGAATATCGGAGACGGATGGGCATGCGGCGCATTAGCTAGTTGGCGGGGTAACGGCCCACCAAGGCGACGATGCGTAGGGGTTCTGAGAGGAAGGTCCCCCACACTGGTACTGAGACACGGACCAG "Bacteria" "Bacteroidetes" "Bacteroidia" "Bacteroidales" "Muribaculaceae" NA NA
GATGAACGCTGGCGGCGTGCCTAACACATGCAAGTCGAACGGAGTCATTAAGGAAAACTCTTCGGAGTCGGAATTCTTGACTTAGTGGCGGACGGGTGAGTAACGCGTGAGCAATCTGCCTTTGGATGTGGGATAACAGCCGGAAACGACTGCTAATACCGCATAACGCATTCTGGCCGCATGACCGGGATGCCAAAGATTTATCGTCCAAAGATGAGCTCGCGTCTGATTAGCTGGTTGGCGGGGTAACGGCCCACCAAGGCGACGATCAGTAGCCGGACTGAGAGGTTGAACGGCCACATTGGGACTGAGACACGGCCCAG "Bacteria" "Firmicutes" "Clostridia" "Clostridiales" "Ruminococcaceae" "But…
GATGAACGCTGGCGGCGTGCCTAACACATGCAAGTCGAACGAAGCATTTACACGGATTTCCTTCGGGGATGAAGGGTTTATGACTGAGTGGCGGACGGGTGAGTAACGCGTGGGCAACCTGCCCCGTACCGGGGGACAACAGCCGGAAACGGCTGCTAATACCGTATACGTTTTAAGGACCGCATGGTCCGTAAAACAAAACTCCGGTGGTACGGGATGGGCCCGCGTCTGATTAGCTCGTTGGCGGGGTAACGGCCCACCAAGGCGACGATCAGTAGCCGGCCTGAGAGGGCGGCCGGCCACATTGGGACTGAGACACGGCCCAG "Bacteria" "Firmicutes" "Clostridia" "Clostridiales" "Lachnospiraceae" "…
GATGAACGCTGGCGGCGTGCTTAACACATGCAAGTCGAACGGACTTATATTGAAACCTAGTGATGTATGAGTTAGTGGCGGACGGGTGAGTAACGCGTGGAGAACCTGCCGTATACTGGGGGATAACACTTAGAAATAGGTGCTAATACCGCATAAGCGCACAGCTTCGCATGAGGCAGTGTGAAAAACTCCGGTGGTATACGATGGATCCGCGTCTGATTAGCTAGTTGGCGGGGTAAAGGCCCACCAAGGCGACGATCAGTAGCCGGCCTGAGAGGGTGAACGGCCACATTGGGACTGAGACACGGCCCAA "Bacteria" "Firmicutes" "Clostridia" "Clostridiales" "Lachnospiraceae" "Lachnospirace…
GATAAACGCTGGCGGCGCACATAAGACATGCAAGTCGAACGAACTTAACCCTTGCTTGCAAGGGAGCGGTTAGTGGCGGACTGGTGAGTAACACGTAAGAAATCTGCCTATCAGAGGGGAATAACAGTGAGAAATCACTGCTAATACCGCATATGCCATAGGGTTCGCATGAACCTAGTGGGAAAGGAGCAATCCGCTGATAGATGAGCTTGCGTCTGATTAGCTAGTTGGTGGGGTAAAGGCCTACCAAGGCAACGATCAGTAGCCGGACTGAGAGGTTGAACGGCCACATTGGGACTGAGATACGGCCCAG "Bacteria" "Firmicutes" "Clostridia" "Clostridiales" "Ruminococcaceae" "Ruminococcace…
GATGAACGCTGGCGGCATGCCTAAGACATGCAAGTCGAACGAAGTGGCCCAATGAAGAATGCGAGCTTGCTCAAATTTGGATTTGGTTTACCACTTAGTGGCGCAAGGGTGAGTAACACGTGGGTAATCTGCCTTCGAGTCTGGAATAACAGTTAGAAATGATTGCTAATGCCGGATTATATATGTAACGATACGTCATTATATATTAAAAGGAGCCTTTAAAGCTTCGCTTGAAGATGAGCCTGCGCCGTATTAGTTAGTTGGTGGGGTAACGGCCTACCAAGACGACGATGCGTAGCCGACCTGAGAGGGTGATCGGCCACACTGGGACTGAGACACGGCCCAG "Bacteria" "Tenericutes" "Mollicutes" "Mollicutes_RF…
GATGAACGCTGGCGGCGTGCTTAACACATGCAAGTCGAACGAAGCGCCTTGCCGGAACCCCTTCGGGGAGGAAGGCATTGCGACTGAGTGGCGGACGGGTGAGTAACGCGTGGGCAACCTGCCCCATACAGGGGGATAACAGTTAGAAATGACTGCTAACACCGCATAAGCGCACAGGGCCGCATGGTCCGGTGTGAAAAACTCCGGTGGTATGGGATGGGCCCGCGTCTGATTAGCCAGTTGGCGGGGTAACGGCCCACCAAAGCGACGATCAGTAGCCGACCTGAGAGGGTGACCGGCCACATTGGGACTGAGACACGGCCCAA "Bacteria" "Firmicutes" "Clostridia" "Clostridiales" "Lachnospiraceae" "…
GATGAACGCTAGCGGCAGGCTTAACACATGCAAGTCGAAGGGCAACGGGGAGAGTGCTTGCACTCTCTGCCGGCGACTGGCGCACGGGTGAGTAACACGTATGCAACCTGCCCTCCACAGGGGGACAACCTTCCGAAAGGGAGGCTAATCCCGCGTATATCCCTTGGGGGCATCCTTGGGGGAGGAAAGGATTACCGGTGGAGGATGGGCATGCGGCGCATTAGGCAGTAGGCGGGGTAACGGCCCACCTAACCGACGATGCGTAGGGGTTCTGAGAGGAAGGTCCCCCACACTGGTACTGAGACACGGACCAG "Bacteria" "Bacteroidetes" "Bacteroidia" "Bacteroidales" "Muribaculaceae" NA NA
GATGAACGCTGGCGGCGTGCCTAACACATGCAAGTCGAACGGATTTATAACGAAACCTAGTGAATTATAAGTTAGTGGCGGACGGGTGAGTAACGCGTGGAAAACCTGCCGTATACTGGGGGATAACACTTAGAAATAGGTGCTAATACCGCATAAGCGCACAGCTTCGCATGAAGCAGTGTGAAAAACTCCGGTGGTATACGATGGTTCCGCGTCTGATTAGCTAGTTGGTGAGGTAAAAGCCCACCAAGGCAACGATCAGTAGCCGGCCTGAGAGGGTGAACGGCCACATTGGGACTGAGACACGGCCCAG "Bacteria" "Firmicutes" "Clostridia" "Clostridiales" "Lachnospiraceae" "Lachnospirace…
GATGAACGCTGGCGGCGCATTTAAGACATGCAAGTCGAACGAAAATATATTTTTTGTTTACAATGAATATATTTTAGTGGCGGACGGGTGAGTAATACGTAGATAATCTGCCTTCCAGAGAGAAATAACAAGAGGAAACTCTTGCTAATGTCGCATAAGACCACGCTGTGGCATCACAGAGAGGTCAAAGGGGAAACCCGCTGGAAGATGAGTCTACGGCTGATTAGCTAGTTGGAGAGGTAAGAGCTCACCAAGGCGATGATCAGTAGCCGGGCTGAGAGGCTGACCGGCCACATTGGGACTGAGACACGGCCCAG "Bacteria" "Firmicutes" "Clostridia" "Clostridiales" "Ruminococcaceae" "Ruminococ…
GATGAACGCTGGCGGCGTGCTTAACACATGCAAGTCGAGCGAAGCGTATTTGCGGAAGTTTTCGGATGGAAGCGGATGCGACTTAGCGGCGGACGGGTGAGTAACGCGTGGGTAACCTGCCTCATACAGGGGGATAACAGTTAGAAATGACTGCTAATACCGCATAAGCGCACAGGACCGCATGGTCCGGTGTGAAAAACTCCGGTGGTATGAGATGGACCCGCGTCTGATTAGCTGGTTGGCGGGGTAACGGCCCACCAAGGCGACGATCAGTAGCCGACCTGAGAGGGTGGCCGGCCACATTGGGACTGAGACACGGCCCAA "Bacteria" "Firmicutes" "Clostridia" "Clostridiales" "Lachnospiraceae" NA …
GATGAACGCTGGCGGCGTGCTTAACACATGCAAGTCGAACGGAGTTAACATTTTTAAAGCAAATAGCTTGCTAGGAGTGGAGAAAGTGTTAACTTAGTGGCGGACGGGTGAGTAACGCGTGGGTAACCTGCCGTATGCAGGGGGATAACACTTAGAAATAGGTGCTAACACCGCATAAGCGCACGGAGACGCATGTTTCTGTGTGAAAAACTCCGGTGGCATACGATGGACCCGCGTCTGATTAGCCAGTTGGCAGGGTAACGGCCTACCAAAGCGACGATCAGTAGCCGGCCTGAGAGGGCGGACGGCCACATTGGGACTGAGACACGGCCCAA "Bacteria" "Firmicutes" "Clostridia" "Clostridiales" "Lachnospi…
GACGAACGCTGGCGGCGTGCCTAATACATGCAAGTCGAACGGAGATATTCGCTGATGAAGTACTTCGGTAATGAATCTTGGATATCTTAGTGGCGGACGGGTGAGTAACGCGTGAGCAACCTGCCTTTCAGAGGGGGATAACGTTTGGAAACGAACGCTAATACCGCATGACATTATCTTATCGCATGGTAGGATAATCAAAGGAGCAATCCGCTGAAAGATGGGCTCGCGTCCGATTAGGTAGTTGGTGGGGTAACGGCCCACCAAGCCGACGATCGGTAGCCGGACTGAGAGGTTGGACGGCCACATTGGGACTGAGACACGGCCCAG "Bacteria" "Firmicutes" "Clostridia" "Clostridiales" "Ruminococcacea…
GACGAACGCTGGCGGTGTGCCTCATACATGCAAGTCGAACGAGAAGCAAGAGCTTGCTCTTGTGGAAAGTGGCGGACGGGTGAGTACAACATAGGAAATCTGCCTTAGGGTGGGGGGCAACAGAGGGAAACTTCTGCTAATACCCCATATGAGCTTGGTTGCAATACCAATCTTGAAAGTTCCGGCGCCCTAAGATGAGCCTGTGCCTGATTAGCTAGTTGGTGGTGTAATGGACTACCAAGGCGACGATCAGTAGCTGGTTTGAGAGGATGATCAGCCACAATGGGACTGAGACACGGCCCAT "Bacteria" "Cyanobacteria" "Melainabacteria" "Gastranaerophilales" NA NA NA
GATAAACGCTGGCGGCGCACATAAGACATGCAAGTCGAACGAAGATCGTTACAAATTGGAGAGAAGATTTATCGGATTGAAAATTTGTAACAATGGTCTTAGTGGCGGACTGGTGAGTAACGCGTAAGTAACCTGCCTGTTAGAGGGGAATAACAATGAGAAATCATTGCTAATACCGCATATGCCATAAGTATCACATGATACTAGTGGGAAAGGAGCAATTCGCTAACAGATGGACTTGCGTCTGATTAGATAGTTGGTGGGGTAACGGCCTACCAAGTCGACGATCAGTAGCCGGACTGAGAGGTTGAACGGCCACATTGGGACTGAGATACGGCCCAG "Bacteria" "Firmicutes" "Clostridia" "Clostridiales" "Ru…
GATAAACGCTGGCGGCGCACATAAGACATGCAAGTCGAACGAAAGTCGTTATAAAATGAATTGAAGATTTATCTGATTGAAGTTTTATAACAATGGCTTTAGTGGCGGACTGGTGAGTAACGCGTGAGCAACCTGCCTATTAGAGGGGAATAACAGTGAGAAATCATTGCTAATACCGCATATGCCATAACCATCACATGGTGGAAGTGGGAAAGGAGCAATCCGCTAATAGATGGGCTCGCGTCTGATTAGATAGTTGGTGGGGTAACGGCCTACCAAGTCAACGATCAGTAGCCGGACTGAGAGGTTGAACGGCCACATTGGGACTGAGATACGGCCCAG "Bacteria" "Firmicutes" "Clostridia" "Clostridiales" "Ru…
GATGAACGCTGGCGGCGTGCCTAACACATGCAAGTCGAACGGGGCGCGCAGGCTGAGGCTTTTCGGAGCGGAAGCCTGCGCTGCCCAGTGGCGGACGGGTGAGTAACGCGTGGGCAACCTGCCCTGCACTGGGGGACAACAGCCGGAAACGGCTGCTAATACCGCATATGCCCGCAGCCCCGCATGGGGCGGCGGGGGAAGCTCCGGCGGTGCAGGATGGGCCCGCGTCTGATTAGCTGGTTGGCGGGGCAACGGCCCACCAAGGCGACGATCAGTAGCCGGCCTGAGAGGGTGGGCGGCCACATTGGGACTGAGACACGGCCCAG "Bacteria" "Firmicutes" "Clostridia" "Clostridiales" "Lachnospiraceae" "…
GATGAACGCTGGCGGCGTGCCTAATACATGCAAGTCGAGCGAACCACTTCGGTGGGAAGCGGCGAACGGGTGAGTAACACGTAGGTGATCTGCCCATCAGACGGGGACAACGATTGGAAACGATCGCTAATACCGGATAGGACGAAAGTTTAAAGATGCTCCTGGCATCACTGATGGATGAGCCTGCGGCGCATTAGCTAGTTGGTGGGGTAAAGGCCTACCAAGGCGACGATGCGTAGCCGACCTGAGAGGGTGAACGGCCACACTGGGACTGAGACACGGCCCAG "Bacteria" "Firmicutes" "Erysipelotrichia" "Erysipelotrichales" "Erysipelotrichaceae" "Turicibacter" NA
GATAAACGCTGGCGGCGCACATAAGACATGCAAGTCGAACGGAAGTCGTTATCAAATGGATTGAAGATTTATCGGATAGAAATTTAATAACAATGGCTTTAGTGGCGGACTGGTGAGTAACGCGTGAGCAACCTGCCTGTTAGAGGGGGATAACAGTGAGAAATCATTGCTAATACCGCATATGCCATAGTCATCACATGATGATAGTGGGAAAGGAGCAATCCGCTAACAGATGGGCTCGCGTCTGATTAGATAGTTGGTGGGGTAACGGCCTACCAAGTCAACGATCAGTAGCCGGACTGAGAGGTTGAACGGCCACATTGGGACTGAGATACGGCCCAG "Bacteria" "Firmicutes" "Clostridia" "Clostridiales" "Ru…
GATAAACGCTGGCGGCGCACATAAGACATGCAAGTCGAACGAAGATCGTTATTAAATGGAATGAAGATTTATCGGAGTGAAGTTTAGTAACAATGGTCTTAGTGGCGGACTGGTGAGTAACGCGTAAGGAACCTGCCTTTTAGAGGGGAATAACAATGAGAAATCATTGCTAATACCGCATATGCCATAGTTATCACATGATAATAGTGGGAAAGGAGCAATTCGCTAAAAGATGGCCTTGCGTCTGATTAGATAGTTGGTAAGGTAACGGCTTACCAAGTCGACGATCAGTAGCCGGACTGAGAGGTTGAACGGCCACATTGGGACTGAGATACGGCCCAG "Bacteria" "Firmicutes" "Clostridia" "Clostridiales" "Ru…
GATGAACGCTAGCGACAGGCTTAACACATGCAAGTCGAGGGGCAGCGGGGTTGTAGCAATACAACTGCCGGCGACCGGCGCACGGGTGAGTAACACGTATGTAACCTGCCCTCTGCAGGGGGATAAGCGGAAGAAATTCCGTCTAATACCGCATAATACAATTTGGAGACATCTCCGGGTTGTCAAAGGAGTGATCCGGCAGAGGATGGACATGCGGCGCATTAGCTAGTCGGCGGGGTAACGGCCCACCGAGGCTACGATGCGTAGGGGTTCTGAGAGGAAGGTCCCCCACACTGGTACTGAGACACGGACCAG "Bacteria" "Bacteroidetes" "Bacteroidia" "Bacteroidales" "Muribaculaceae" NA NA
GATGAACGCTGGCGGCGTGCTTAACACATGCAAGTCGAACGGAGTTAACATTTTTAAAGCAAATAGCTTGCTAGGAGTGGAGAAGGTGTTAACTTAGTGGCGGACGGGTGAGTAACGCGTGGGTAACCTGCCGTATGCAGGGGGATAACACTTAGAAATAGGTGCTAACACCGCATAAGCGCACGAGAGCGCATGCTTTTGTGTGAAAAACTCCGGTGGCATACGATGGACCCGCGTCTGATTAGCCAGTTGGCAGGGTAACGGCCTACCAAAGCGACGATCAGTAGCCGGCCTGAGAGGGCGGACGGCCACATTGGGACTGAGACACGGCCCAA "Bacteria" "Firmicutes" "Clostridia" "Clostridiales" "Lachnospi…
GATAAACGCTGGCGGCGCACATAAGACATGCAAGTCGAACGGACTTAACCATTAGTTTACTATTGGAGCGGTTAGTGGCGGACTGGTGAGTAACACGTAAGCAACCTGCCTATCAGAGGGGAACAACAGTTAGAAATGACTGCTAATACCGCATATGCCTTGAGTTACGCATGTAACAAAAGGGAAAGGAGCAATCCGCTGATAGATGGGCTTGCGTCTGATTAGCTAGTTGGTGGGGTAAAGGCCTACCAAGGCGACGATCAGTAGCCGGACTGAGAGGTTGAACGGCCACATTGGGACTGAGATACGGCCCAG "Bacteria" "Firmicutes" "Clostridia" "Clostridiales" "Ruminococcaceae" "Ruminococca…
GATGAACGCTGGCGGCGTGCTTAACACATGCAAGTCGAACGAAGCACAGAGAGCAGATTACTTCGGTTTGAAGCTTTTTGTGACTGAGTGGCGGACGGGTGAGTAACGCGTGGATAACCTGCCTCACACAGGGGGATAACAGTTAGAAATGACTGCTAATACCGCATAAGCGCACAGTCTCGCATGGGACAGTGTGAAAAACTGAGGTGGTGTGAGATGGATCCGCGTCTGATTAGGCAGTTGGCGGGGTAACGGCCCACCAAACCAACGATCAGTAGCCGGCCTGAGAGGGTGAACGGCCACATTGGGACTGAGACACGGCCCAA "Bacteria" "Firmicutes" "Clostridia" "Clostridiales" "Lachnospiraceae" "…
GATGAACGCTGGCGGCGCATTTAAGACATGCAAGTCGAACGGAAATATATTTTTTGTTTACAATGAATATATTTTAGTGGCGGACGGGTGAGTAATACGTAGATAATCTGCCTTTCAGAGAGAAATAACAAGAGGAAACTTTTGCTAATGTCTCATAAGACCACACTGTGGCATCACAGAGAGGTCAAAGGGGAAACCCGCTGAAAGATGAGTCTACGGCTGATTAGCTAGTTGGAGAGGTAAGAGCTCACCAAGGCGATGATCAGTAGCCGGGCTGAGAGGCTGGCCGGCCACATTGGGACTGAGACACGGCCCAG "Bacteria" "Firmicutes" "Clostridia" "Clostridiales" "Ruminococcaceae" "Ruminococ…
GATGAACGCTGGCGGCGTGCTTAACACATGCAAGTCGAACGAAGCGCCTGCTTTAAATTCCTTCGGGGAGGAGAAGCCTGCGACTGAGTGGCGGACGGGTGAGTAACGCGTGGGCAACCTGCCCCGCACTGGGGGACAACAGCTGGAAACGGCTGCTAATACCGCATAGGCGCACAGCCTCGCATGAGGCAGTGTGGAAAACTCCGGTGGTGCGGGATGGGCCCGCGTCTGATTAGCTGGTTGGCGGGGTAACGGCCCACCAAGGCAACGATCAGTAGCCGGCCTGAGAGGGTGGACGGCCACATTGGGACTGAGACACGGCCCAG "Bacteria" "Firmicutes" "Clostridia" "Clostridiales" "Lachnospiraceae" "…
GATGAACGCTGGCGGCGTGCTTAACACATGCAAGTCGAACGAAGCACTTAAGAAAGATTCTTCGGATGAAAGCTTTTGTGACTGAGTGGCGGACGGGTGAGTAACGCGTGGGTAACCTGCCTCACACAGGGGGATAACAGTTGGAAACGACCGCTAATACCGCATAACCCGCTGGTACCGCATGGTACTGACGGAAAAGATTTATCGGTGTGAGATGGACCCGCGTCTGATTAGCCAGTTGGCAGGGTAACGGCCTACCAAAGCGACGATCAGTAGCCGGCCTGAGAGGGTGAACGGCCACATTGGGACTGAGACACGGCCCAA "Bacteria" "Firmicutes" "Clostridia" "Clostridiales" "Lachnospiraceae" NA …
GATGAACGCTGGCGGCGTGCTTAACACATGCAAGTCGAGCGGAGCGCCGCGCACGGAACCCACGGGGGAAGGGCGCAGCGACTTAGCGGCGGACGGGTGAGTAACGCGTGGGCAACCTGCCCCATACCGGGGGATAACAGCCAGAAATGGCTGCTAATACCGCATAAGGCCGCGGCGGCGCATGCCGCAGCGGCAAAAACTCCGGTGGTATGGGATGGGCCCGCGTCTGATTAGCTAGTTGGCGGGGCAACGGCCCACCAAGGCGACGATCAGTAGCCGGCCTGAGAGGGCGGACGGCCACATTGGGACTGAGACACGGCCCAA "Bacteria" "Firmicutes" "Clostridia" "Clostridiales" "Lachnospiraceae" NA …
GACGAACGCTGGCGGCGTGCCTAATACATGCAAGTAGAACGCTGAAGAGAGGAGCTTGCTCTTCTTGGATGAGTTGCGAACGGGTGAGTAACGCGTAGGTAACCTGCCTTGTAGCGGGGGATAACTATTGGAAACGATAGCTAATACCGCATAACAATGGATGACACATGTCATTTATTTGAAAGGGGCAATTGCTCCACTACAAGATGGACCTGCGTTGTATTAGCTAGTAGGTGAGGTAATGGCTCACCTAGGCGACGATACATAGCCGACCTGAGAGGGTGATCGGCCACACTGGGACTGAGACACGGCCCAG "Bacteria" "Firmicutes" "Bacilli" "Lactobacillales" "Streptococcaceae" "Streptococ…
GATGAACGCTAGCGACAGGCCTAACACATGCAAGTCGAGGGGCATCGGGGGAGGAAGCTTGCTTCCGCCTGCCGGCGACCGGCGCACGGGTGAGTAACGCGTATGCAACCTGCCCGGACCAGCGGGATAACCCGGGGAAACCCGGCCTAATACCGCACGGCGCCGCCGAGGGGCATCCCTTGGCGGCTAAAGAACCATCGGGTCCGGATGGGCATGCGTGGCATTAGCTTGTTGGCGGGGTAACGGCCCACCAAGGCGACGATGCCTAGGGGTTCTGAGAGGAAGGTCCCCCACACTGGTACTGAGACACGGACCAG "Bacteria" "Bacteroidetes" "Bacteroidia" "Bacteroidales" "Muribaculaceae" NA NA
GATGAACGCTGGCGGCGTGCCTAACACATGCAAGTCGAACGAAGCGCTGGGAGCGGAACATTTCGGTGGGAAGCATCCAATGACTGAGTGGCGGACGGGTGAGTAACGCGTGGGTAACCTGCCTCATACAGGGGGATAACAGCCAGAAATGACTGCTAATACCGCATAAGCGCACGGAACCGCATGGTTCTGTGTGAAAAACTCCGGTGGTATGAGATGGACCCGCGTCTGATTAGCTAGTTGGCGGGGTAACGGCCCACCAAGGCAGCGATCAGTAGCCGGCCTGAGAGGGTGGACGGCCACATTGGGACTGAGACACGGCCCAA "Bacteria" "Firmicutes" "Clostridia" "Clostridiales" "Lachnospiraceae" "…
GACGAACGCTGGCGGCGTGCCTAACACATGCAAGTCGAACGAGAATCCGTGGAAGGAGGCTTCGGCCAACGGAAGCGGAGGACAGTGGCGAACGGGTGAGTAACGCGTGAGCAACCTGCCTTTCAGTGGGGGACAACAGAGGGAAACTTCTGCTAATACCGCATAACGTGCCTTGGGGGCATCCCTGGGGTACCAAAGATTTATTGCTGAAAGATGGGCTCGCGTCTGATTAGATAGTTGGCGGGGTAACGGCCCACCAAGTCGACGATCAGTAGCCGGTCTGAGAGGATGAACGGCCACATTGGGACTGAGATACGGCCCAG "Bacteria" "Firmicutes" "Clostridia" "Clostridiales" "Ruminococcaceae" "Rum…
GATAAACGCTGGCGGCGCACATAAGACATGCAAGTCGAACGGACTTAACTGAAATGTTTACATTTTAGAGCGGTTAGTGGCGGACTGGTGAGTAACACGTAAGCAACCTGCCTATTAGAGGGGAATAACAGTGAGAAATCATTGCTAATACCGCATATACTATTTACATTGCATGATGTAAATAGGAAAGGAGTAATCCGCTGATAGATGGGCTTGCGTCTGATTAGATAGTTGGTGGGGTAACGGCCTACCAAGTCGACGATCAGTAGCCGGACTGAGAGGTTGAACGGCCACATTGGGACTGAGATACGGCCCAG "Bacteria" "Firmicutes" "Clostridia" "Clostridiales" "Ruminococcaceae" "Ruminococ…
GATGAACGCTAGCGACAGGCTTAACACATGCAAGTCGAGGGGCAGCGGGGGAGGAAGCTTGCTTTCTCCTGCCGGCGACCGGCGCACGGGTGAGTAACACGTATGCAACCTGGCCGTCACAGGTGGATAACCGGAAGAAATTCCGACTAATACAGCATAACACTCCTGAGGGGCATCCTTCGGGAGTCAAAGGAGGTAACTCCGGTGACGGATGGGCATGCGGCGCATTAGGTAGTTGGTAGGGTAACGGCCTACCAAGCCGACGATGCGTAGGGGTTCTGAGAGGAAGGTCCCCCACATTGGAACTGAGACACGGTCCAA "Bacteria" "Bacteroidetes" "Bacteroidia" "Bacteroidales" "Muribaculaceae" NA …
GATGAACGCTGGCGGCGTGCCTAACACATGCAAGTCGAACGGGGGCAGATTGAAACCTAGTGATATCTGCCCGAGTGGCGGACGGGTGAGTAACGCGTGGACAACCTGCCGCATGCAGGGGGATACCGGCTGGAAACAGCCGCTAATACCGCATATGCGCACGGCGCCGCATGGCGCCGCACGGAAAGGGAGCAATCCCGGCATGCGATGGGTCCGCGTCCGATTAGCTTGTTGGCGGGGCAGCGGCCCACCAAGGCGACGATCGGTAGCCGGCCTGAGAGGGCGGACGGCCACATTGGGACTGAGACACGGCCCAG "Bacteria" "Firmicutes" "Clostridia" "Clostridiales" "Lachnospiraceae" NA NA
GATGAACGCTGGCGGCGTGCTTAACACATGCAAGTCGAACGGAGTTATCATTTTTGAAGCGATTAGCTTGCTAAGAGTGGAAATGTTGGTAACTTAGTGGCGGACGGGTGAGTAACGCGTGGAGAACCTGCCTTACACAGGGGGATAACACTTAGAAATAGGTGCTAATACCGCATAAGCGCACAGGACCGCATGGTCCGGTGTGAAAAACTGAGGTGGTGTAAGATGGCTCCGCGTCTGATTAGCTTGTTGGTAGGGTAACGGCCTACCAAGGCGACGATCAGTAGCCGGCCTGAGAGGGTGAACGGCCACATTGGGACTGAGACACGGCCCAA "Bacteria" "Firmicutes" "Clostridia" "Clostridiales" "Lachnospi…
GATGAACGCTGGCGGCGTGCTTAACACATGCAAGTCGAACGAAGCAATTGAGAGGAAGTTTTCGGATGGAATTTCAATTGACTGAGTGGCGGACGGGTGAGTAACGCGTGGGTAACCTGCCTCATACAGGGGGATAACAGTTAGAAATGACTGCTAATACCGCATAAGCGCACGAGATCGCATGATAAAGTGTGAAAAACTCCGGTGGTATGAGATGGACCCGCGTCTGATTAGCTGGTTGGTGGGGTAACGGCCCACCAAGGCGACGATCAGTAGCCGACCTGAGAGGGTGACCGGCCACATTGGGACTGAGACACGGCCCAA "Bacteria" "Firmicutes" "Clostridia" "Clostridiales" "Lachnospiraceae" NA …
GACGAACGCTGGCGGCACGCCTAACACATGCAAGTCGAACGGAGTGAAGATGCTTGCATCTGAACTTAGTGGCGGACGGGTGAGTAACACGTGAGCAACCTGCCTTTCAGAGGGGGATAACGTTTGGAAACGAACGCTAATACCGCATAAAATATCGGAGTCGCATGGCACTGATATCAAAGGAGTAATCCGCTGAAAGATGGGCTCGCGTCCGATTAGGCAGTTGGCGGGGTAACGGCCCACCAAACCGACAATCGGTAGCCGGACTGAGAGGTTGAACGGCCACATTGGGACTGAGACACGGCCCAG "Bacteria" "Firmicutes" "Clostridia" "Clostridiales" "Ruminococcaceae" NA NA
GACGAACGCTGGCGGCGTGCTTAACACATGCAAGTCGAACGGAGTACCCTCGAAAGAGATTTCGGTCAATGGAGAGGACTACTTAGTGGCGGACGGGTGAGTAACGCGTGAGGAACCTGCCTTTCAGAGGGGGACAACAGTTGGAAACGACTGCTAATACCGCATAACGTACAGGTATCGCATGGTACTGGTACCAAAGATTTATCGCTGAGAGATGGCCTCGCGTCTGATTAGCTAGTTGGTAGGGTAACGGCCTACCAAGGCGATGATCAGTAGCCGGACTGAGAGGTTGGCCGGCCACATTGGGACTGAGATACGGCCCAG "Bacteria" "Firmicutes" "Clostridia" "Clostridiales" "Ruminococcaceae" "Ru…
GATGAACGCTGGCGGCGTGCCTAACACATGCAAGTCGAACGAAGCGTGCCGGAGGAAGTTTTCGGATGGAATCCGGGATGACTGAGTGGCGGACGGGTGAGTAACGCGTGGGTAACCTGCCCTGTACAGGGGGACAACAGTTAGAAATGACTGCTAATACCGCATAAGCGCACAGGACCGCATGGTCCGGTGTGAAAAACTCCGGTGGTACAGGATGGACCCGCGTCTGATTAGGTAGTTGGCGGGGTAACGGCCCACCAAGCCGACGATCAGTAGCCGACCTGAGAGGGTGACCGGCCACATTGGGACTGAGACACGGCCCAA "Bacteria" "Firmicutes" "Clostridia" "Clostridiales" "Lachnospiraceae" "La…
AACGAACGCTGGCGGCAGGCTTAACACATGCAAGTTGAACGGGATTTGTGTGGTGCTTGCACCATATAATGAGAGTAGCGCACTGGTGAGTAACACGTGGGAACGTGCCTTTTAGTGGGGGATAACATCTGGAAACGGATGCTAATACCGCATACGCCCTGAGGGGGAAAGATTTATTGCTAAAAGGTCGGCCCGCGGTAGATTAGGCAGTTGGTGGGGTAAAGGCCTACCAAACCTACGATCTATAGCTGGTCTGAGAGGACGATCAGCCACATTGGAACTGAGACACGGTCCAG "Bacteria" "Proteobacteria" "Alphaproteobacteria" "Rhodospirillales" NA NA NA
GATGAACGCTGGCGGCGTGCCTAACACATGCAAGTCGAGCGAAGCGATTTTGAGGAAGTTTTCGGATGGAATTGAAATTGACTTAGCGGCGGACGGGTGAGTAACACGTGGGTAATCTGCCTTATACAGGGGGATAACAGTTAGAAATGACTGCTAATACCGCATAAGCGCACGGGGACGCATGTTTCTGTGTGAAAAACTCCGGTAGTATAAGATGAGCCCGCGTCTGATTAGCTGGTTGGTGGGGTAACGGCCTACCAAGGCGACGATCAGTAGCCGGCCTGAGAGGGTGAACGGCCACATTGGGACTGAGACACGGCCCAA "Bacteria" "Firmicutes" "Clostridia" "Clostridiales" "Lachnospiraceae" NA …
GACGAACGCTGGCGGCGTGCTTAACACATGCAAGTCGAACGGAGCACCCCTGAAAGAGTTTTCGGACAATGGAAGGGAATGCTTAGTGGCGGACTGGTGAGTAACGCGTGAGGAACCTGCCTTCCAGAGGGGGACAACAGTTGGAAACGACTGCTAATACCGCATGACACATGACCGTGGCATCACGGACATGTCAAAGATTTATCGCTGGAAGATGGCCTCGCGTCTGATTAGCTAGTAGGCGGGGTAACGGCCCACCTAGGCGACGATCAGTAGCCGGACTGAGAGGTTGACCGGCCACATTGGGACTGAGATACGGCCCAG "Bacteria" "Firmicutes" "Clostridia" "Clostridiales" "Ruminococcaceae" "Os…
GATGAACGCTGGCGGCGTGCTTAACACATGCAAGTCGAGCGGGGCGCATCTGCGGAATTTTTTGGAAGGAAGCGGATGCGCTTAGCGGCGGACGGGTGAGTAACGCGTGGGCAACCTGCCTCATACGGGGGGATAACAGTTAGAAATGACTGCTAATACCGCATAAGCGCACGAGGGCCGCATGGCCCGGTGTGAAAAACTCCGGTGGTATGAGATGGACCTGCGTCTGATTAGCTTGTTGGCGGGGTAACGGCCCACCAAGGCGACGATCAGTAGCCGACCTGAGAGGGTGGCCGGCCACATTGGGACTGAGACACGGCCCAA "Bacteria" "Firmicutes" "Clostridia" "Clostridiales" "Lachnospiraceae" NA …
ATTGAACGCTGGCGGCAGGCTTAACACATGCAAGTCGAACGATGACTAACTAGCTTGCTAGTTATGATTAGTGGCGGACGGGTGAGTAACATTTAGGAATCTGCCTAGTAGTGGGGGATAGCTCGGGGAAACTCGAATTAATACCGCATACGACCTACGGGTGAAAGGGGGCGCAAGCTCTTGCTATTAGATGAGCCTAAATCAGATTAGCTAGTTGGTGGGGTAAAGGCCCACCAAGGCGACGATCTGTAACTGGTCTGAGAGGATGATCAGTCACACCGGAACTGAGACACGGTCCGG "Bacteria" "Proteobacteria" "Gammaproteobacteria" "Pseudomonadales" "Moraxellaceae" "Enhydrobacter…
GATAAACGCTGGCGGCGCACATAAGACATGCAAGTCGAACGAAAGTCGTTATAAAATGAATTGAAGATTTATCTGATTGAAGTTTTATAACAATGGCTTTAGTGGCGGACTGGTGAGTAACGCGTGAGCAACCTGCCTATTAGAGGGGAATAACAGTGAGAAATCATTGCTAATACCGCATATGCCATAGTCATCACATGATGATAGTGGGAAAGGAGTAATCCGCTAATAGATGGGCTCGCGTCTGATTAGATAGTTGGTGGGGTAACGGCCTACCAAGTCAACGATCAGTAGCCGGACTGAGAGGTTGAACGGCCACATTGGGACTGAGATACGGCCCAG "Bacteria" "Firmicutes" "Clostridia" "Clostridiales" "Ru…
GATGAACGCTGGCGGCGTGCTTAACACATGCAAGTCGAACGAGAACCAATGGAATGAGGATTCGTCCAAAGGAAGTTGGGGAAAGTGGCGGACGGGTGAGTAACGCGTGAGCAATCTGCCTTGGAGTGGGGAATAACGGTTGGAAACAGCCGCTAATACCGCATGATGCAGCTGAGGGGCATCTCTTGGCTGCCAAAGATTTATCGCTCTGAGATGAGCTCGCGTCTGATTAGCTTGTTGGCGGGGTAACGGCCCACCAAGGCGACGATCAGTAGCCGGACTGAGAGGTTGGCCGGCCACATTGGGACTGAGACACGGCCCAG "Bacteria" "Firmicutes" "Clostridia" "Clostridiales" "Ruminococcaceae" NA NA
GATGAACGCTGGCGGCGTGCTTAACACATGCAAGTCGAACGAAGATATTAAGAATGAGAGCTTCGGCAGGAATTTTTTCTATCTTAGTGGCGGACGGGTGAGTAACGTGTGGGCAACCTGCCCTGCACTGGGGAATAATCATTGGAAACGATGACTAATACCGCATACGGTTCCTGGGAGGCATCTTCCGGGAAAGAAAGGATTTATTCGGTGCAGGATGGGCCCGCATCTGATTAGCTAGTTGGTGAGATAACAGCCCACCAAGGCGACGATCAGTAGCCGACCTGAGAGGGTGACCGGCCACATTGGGACTGAGACACGGCCCAA "Bacteria" "Firmicutes" "Clostridia" "Clostridiales" "Lachnospiraceae" …
GATAAACGCTGGCGGCGCACATAAGACATGCAAGTCGAACGAACTTAGGCTCATTCTTTACGATTGAGTACGGTTAGTGGCGGACTGGTGAGTAACGCGTGAGCAACCTGGCTATAAGAGGGGAATAACAGTTAGAAATGACTGCTAATACCGCATAAGCTGATAAAGTCGCATGATTTAGTCAGAAAAGGAGCAATCCGCTTATAGATGGGCTCGCGTCCGATTAGCTAGTTGGTGGGGTAGAAGCCTACCAAGGCGACGATCGGTAGCCGGACTGAGAGGTTGAACGGCCACATTGGGACTGAGATACGGCCCAG "Bacteria" "Firmicutes" "Clostridia" "Clostridiales" "Ruminococcaceae" "Ruminococ…
GATAAACGCTGGCGGCGCACATAAGACATGCAAGTCGAACGAACTTAACTCATTCTTTTAGATTGAGAGCGGTTAGTGGCGGACTGGTGAGTAACACGTAAGCAACCTGCCTATCAGAGGGGAATAACAGTGAGAAATCATTGCTAATACCGCATAAGCTAGTAGTATCACATGATACAGCTAGAAAAGGAGCAATCCGCTGATAGATGGGCTTGCGTCTGATTAGCTAGTTGGTGGGGTAACGGCCTACCAAGGCGACGATCAGTAGCCGGACTGAGAGGTTGAACGGCCACATTGGGACTGAGATACGGCCCAG "Bacteria" "Firmicutes" "Clostridia" "Clostridiales" "Ruminococcaceae" "Ruminococc…
GATAAACGCTGGCGGCGCACATAAGACATGCAAGTCGAACGGAAGTCGTTGTAATGATATAGACATGGACAGAGAACTTGTTCGAAGAAAGTGAAAGTTGACTTACAACAATGGCTTTAGTGGCGGACTGGTGAGTAACACGTAAGCAACCTGCCTATCAGAGGGGAACAACAGTTAGAAATGACTGCTAATACCGCATATGCCTTAGCAACACATGTTGCAAAAGGGAAAGGAGCAATCCGCTGATAGATGGGCTTGCGTCTGATTAGATAGTTGGTGGGGTAACGGCCTACCAAGTCGACGATCAGTAGCCGGACTGAGAGGTTGAACGGCCACATTGGGACTGAGATACGGCCCAG "Bacteria" "Firmicutes" "Clostridia" "C…
GATGAACGCTGGCGGCATGCCTAAGACATGCAAGTCGAACGGAGTGGCCTACTGAAAGTGAAGTGCTTGCACAAAGCTGGACGTAGATTTCCACTTAGTGGCAGACGGGTGAGTAACACGTGGGTAACCTACCTCGGAGACTGGGACAACAATTAGAAATGATTGCTAATACCGGATGATTCATATTTACATAAGTAGATATGCTAAAAGGAGCTTCGGCTTCACTTCGAAATGGGCTTGCGTTGTATTAGCTTGTTGGTGGGGTAATGGCCTACCAAGGCTACGATGCATATCCGAGCTGAGAGGCTGATCGGACACACTGGGACTGAGACACGGCCCAG "Bacteria" "Tenericutes" "Mollicutes" "Mollicutes_RF39" N…
GATGAACGCTGGCGGCGTGCTTAACACATGCAAGTCGAGCGAAAATAATTGAGAGCTTGCTTTTGATTATTTTAGCGGCGGACGGGTGAGTAACGTGTGGGTAACCTGCCTTTTACTGTGGAATAATCGTTGGAAACGACGACTAATACCGCATACGGTTCTTGGAAGGCATCTTCTAAGAAAGAAAGGATTTATTCGGTAAAAGATGGGCCCGCATCTGATTAGCTAGTTGGTGAGATAACAGCCCACCAAGGCAACGATCAGTAGCCGACCTGAGAGGGTGACCGGCCACATTGGGACTGAGACACGGCCCAA "Bacteria" "Firmicutes" "Clostridia" "Clostridiales" "Lachnospiraceae" "ASF356" NA
GATGAACGCTGGCGGCGTGCCTAACACATGCAAGTCGAACGGGGCCGCGCGAGGCCCGGGGAAGGTTTACCGGACCCGGGGCGGACGCGGCCTAGTGGCGGACGGGTGAGTAACGCGTGGGCAATCTGCCCCGTACCGGGGGATAACACCTGGAAACAGGTGCTAACACCGCATGACAGGCGGGGGCGCATGCCCCGGCCTTGAAAACTCCGGTGGTACGGGATGAGCCCGCGTCCGATTAGCCAGTTGGCGGGGTAACGGCCCACCAAAGCGACGATCGGTAGCCGGCCTGAGAGGGTGGACGGCCACATTGGGACTGAGACACGGCCCAA "Bacteria" "Firmicutes" "Clostridia" "Clostridiales" "Lachnospirac…
GATGAACGCTGGCGGCGTGCTTAACACATGCAAGTCGAACGGGGATAAGGAGAGCTTGCTTTTCTTATCTTAGTGGCGGACGGGTGAGTAACGCGTGGATAACCTGGCCCATACAGGGGGATAGCAGCTGGAAACGGCTGGTAATACCGCATAAGCGCACGGTACGGCATCGTACGGTGTGAAAAACTCCGGTGGTATGGGATGGGTCCGCGTCTGATTAGGCAGTTGGCGGGGTAAAGGCCCACCAAACCGACGATCAGTAGCCGGCCTGAGAGGGTGGGCGGCCACATTGGGACTGAGACACGGCCCAA "Bacteria" "Firmicutes" "Clostridia" "Clostridiales" "Lachnospiraceae" NA NA
GACGAACGCTGGCGGCGTGCTTAACACATGCAAGTCGAACGGAGTACCCTCGAAAGAGATTTCGGTCAATGGAGAGGACTACTTAGTGGCGGACGGGTGAGTAACGCGTGAGGAACCTGCCTTTCAGAGGGGGACAACAGTTGGAAACGACTGCTAATACCGCATAACGTACAGGTATCGCATGGTACTGGTACCAAAGATTTATCGCTGAGAGATGGCCTCGCGTCTGATTAGCTAGTTGGTAGGGTAACGGCCTACCAAGGCGACGATCAGTAGCCGGACTGAGAGGTTGGCCGGCCACATTGGGACTGAGATACGGCCCAG "Bacteria" "Firmicutes" "Clostridia" "Clostridiales" "Ruminococcaceae" "Ru…
GACGAACGCTGGCGGTATGCTTAACACATGCAAGTCGAACGGGGTCCACAGCTTGCTGGGGACCTAGTGGCGAACGGGTGAGTAACACGTGAGCAACCTGCCCTATACAACGGGATACCTACGGGAAACTGTAGTTAATACGGTATAAGACCACACAGTCGCATGGCTGAGGGGTAAAAGGAGAAATCCGGTATAGGATGGGCTCGCGGCGCATTAGCTAGTTGGTGAGGTAACGGCTCACCAAGGCGACGATGCGTAGCCGACCTGAGAGGGTGGACGGCCACACTGGGACTGAGATACGGCCCAG "Bacteria" "Firmicutes" "Clostridia" "Clostridiales" "Clostridiales_vadinBB60_group" NA NA
GATGAACGCTGGCGGCGTGCTTAACACATGCAAGTCGAACGAAGCGCTACCGACGGAACTTTTCGGAGGGAAGATGGTAATGACTGAGTGGCGGACGGGTGAGTAACGCGTGGGTAACCTGCCTCACAGAGGGGGACAACAGCCGGAAACGGCTGCTAATACCGCATAACAAGGAACTGCCGCATGACAGTTTCTTCAAAGATTTATCGCTGTGAGATGGACCCGCGTCTGATTAGCTAGTTGGCAGGGTAACGGCCTACCAAGGCGACGATCAGTAGCCGGCTTGAGAGAGTGAACGGCCACATTGGGACTGAGACACGGCCCAG "Bacteria" "Firmicutes" "Clostridia" "Clostridiales" "Lachnospiraceae" N…
GATGAACGCTGGCGGCATGCCTAAGACATGCAAGTCGAACGGAATGACCCATTGAAAATGGAGTGCTTGCACAAAGTTGGAAATGGATTTTCATTCAGTGGCAGACGGGTGAGTAACACGTGGGTAATCTACCTCGAAGACTGGGATAACGTTTGGAAACGAACGCTAATACCAGATAATTCCTATTTAGATAACTAGATAGGCTAAAAGGGGCTTTCAAGCCTTACTTCGAGATGAGCTTGCGGTGTATTAGCTAGTTGGTGGGGTAATGGCCTACCAAGGCAACGATGCATATCCGAGCTGAGAGGCTGATCGGACACACTGGGACTGAGACACGGCCCAG "Bacteria" "Tenericutes" "Mollicutes" "Mollicutes_RF39"…
GATGAACGCTGGCGGCGTGCTTAACACATGCAAGTCGAACGGAGTTATCATTTTTGAAGCGATTAGCTTGCTAAGAGTGGAAATGTTGGTAACTTAGTGGCGGACGGGTGAGTAACGCGTGGAGAACCTGCCTTACACAGGGGGATAACACTTAGAAATAGGTGCTAATACCGCATAAGCGCACAGGACCGCATGGTCAAGTGTGAAAAACTGAGGTGGTGTAAGATGGCTCCGCGTCTGATTAGCTGGTTGGTAGGGTAACGGCCTACCAAGGCGACGATCAGTAGCCGGCCTGAGAGGGTGAACGGCCACATTGGGACTGAGACACGGCCCAA "Bacteria" "Firmicutes" "Clostridia" "Clostridiales" "Lachnospi…
GATGAACGCTGGCGGCGTGCTTAACACATGCAAGTCGAACGAAGCACATGTAGCGGACTGGAGAGCTTGCTCAAAGGGAAGCAGCATGTGACTGAGTGGCGGACGGGTGAGTAACGCGTGGATAACCTACCTCATACAGGGGGATAACAGTTGGAAACGACTGTTAATACCGCATAAGCGCACGGGACTGCATGGTTCTGTGTGAAAAACTCCGGTGGTATGAGATGGGTCCGCGTCTGATTAGCTAGTTGGCAGGGTAACGGCCTACCAAGGCGACGATCAGTAGCCGGCCTGAGAGGGTGTACGGCCACATTGGGACTGAGACACGGCCCAA "Bacteria" "Firmicutes" "Clostridia" "Clostridiales" "Lachnospir…
GATGAACGCTGGCGGCATGCCTAACACATGCAAGTCGAACGGGGTTTATATGACAGAACTCTCCGGAGGGAAGATATATAAACCTAGTGGCGGACGGGTGAGTAACGCGTGGGCAACCTGCCCTGTACCGGGGGACAACAGCCAGAAATGGCTGCTAATACCGCATAAGCCTGCTGTGCCGCATGGCACAGCAGGGAAAACCACGGTGGTACAGGATGGGCCCGCGTCTGATTAGTTAGTTGGCAGGGTAACGGCCTACCAAGACAACGATCAGTAGCCGGCTTGAGAGAGTGGACGGCCACATTGGGACTGAGACACGGCCCAG "Bacteria" "Firmicutes" "Clostridia" "Clostridiales" "Lachnospiraceae" "L…
GATGAACGCTAGCGGCAGGCTTAACACATGCAAGTCGGGCGGCAGCGGGGTGGGAGCTTGCTCCCACTGCCGGCGAGCGGCGCACGGGTGAGTAACACGTATGCAACCTGCCCCTGTCAGGGGGACAACCCGCCGAAAGGCGGGCTAAGCCCGCGTATATCGCCCCGGGGCATCCCGGGGGGAGGAAAGGAGCGATCCGGACAGGGATGGGCATGCGGCGCATTAGCTGGTCGGCGGGGTAACGGCCCACCGAGGCGACGATGCGTAGGGGTTCTGAGAGGAAGGCCCCCCACACTGGTACTGAGACACGGACCAG "Bacteria" "Bacteroidetes" "Bacteroidia" "Bacteroidales" "Muribaculaceae" NA NA
GATGAACGCTGGCGGCGTGCTTAACACATGCAAGTCGAACGAAGCGAGAACTAAAGCGCAAGCAGAGGTTCTTGACTGAGTGGCGGACGGGTGAGTAACGCGTGGATAACCTGCCTTTCACAGGGGGATAACAGCTGGAAACGGTTGCTAATACCGCATGAGCCTCTTTTGTCGCATGACGGGAGAGGGAAAGAGAAATCGGTGAGAGATGGATCCGCGTCCGATTAGCTAGTTGGAGGGGTAACAGCCCACCAAGGCGACGATCGGTAGCCGACCTGAGAGGGTGGACGGCCACATTGGGACTGAGACACGGCCCAA "Bacteria" "Firmicutes" "Clostridia" "Clostridiales" "Lachnospiraceae" NA NA
GATAAACGCTGGCGGCGCACATAAGACATGCAAGTCGAACGGACTTAACCGAGATGTTTACATTTTGGAGCGGTTAGTGGCGGACTGGTGAGTAACACGTAAGCAACTTGCCTATTAGAGGGGAATAACAGTGAGAAATCATTGCTAATACCGCATATGCCATAAACACCACATGGTGAAAGTGGGAAAGGAGAAATCCGCTAATAGATGGGCTTGCGTCTGATTAGATAGTTGGTGGGGTAACGGCCTACCAAGTCGACGATCAGTAGCCGAACTGAGAGGTTGAACGGCCACATTGGGACTGAGATACGGCCCAG "Bacteria" "Firmicutes" "Clostridia" "Clostridiales" "Ruminococcaceae" "Ruminococ…
GATGAACGCTGGCGGCGTGCTTAACACATGCAAGTCGAACGGAGTAAAGATTTTGATTTCTAACGATTGAGAGGTCTTTACTTAGTGGCGGACGGGTGAGTAACGCGTGGATAACCTGCCCCATACCGGGGGATAACAGCCGGAAACGGCTGCTAATACCGCATAAGCGCACGAGGCTGCATGGCCTTGTGTGAAAAACTCCGGTGGTATGGGATGGATCCGCGTCTGATTAGCTAGTTGGTGAGATAAAAGCCCACCAAGGCGACGATCAGTAGCCGACCTGAGAGGGTGGCCGGCCACATTGGGACTGAGACACGGCCCAG "Bacteria" "Firmicutes" "Clostridia" "Clostridiales" "Lachnospiraceae" NA NA
GACGAACGCTGGCGGCGTGCTTAACACATGCAAGTCGAACGGAGTGCCCCTGAAAGAGTTTTCGGACAATGGAAGGGAACACTTAGTGGCGGACTGGTGAGTAACGCGTGAGGAACCTGCCTTCCAGAGGGGGACAACAGTTGGAAACGACTGCTAATACCGCATGATGCATTTGAATCGCATGGTTTGAATGTCAAAGATTTATCGCTGGAAGATGGCCTCGCGTCTGATTAGCTAGTTGGTGAGGTAACGGCCCACCAAGGCGACGATCAGTAGCCGGACTGAGAGGTTGGCCGGCCACATTGGGACTGAGATACGGCCCAG "Bacteria" "Firmicutes" "Clostridia" "Clostridiales" "Ruminococcaceae" "Os…
ATTGAACGCTGGCGGCAGGCTTAACACATGCAAGTCGAGCGGGCGAGGTTGCTTCGGTAACTGAGCTAGCGGCGGACGGGTGAGTAAAGCTTAGGAATCTGCCTATTAGTGGGGGACAACATTTCGAAAGGGATGCTAATACCGCATACGTCCTACGGGAGAAAGCAGGGGATCACTTGTGACCTTGCGCTAATAGATGAGCCTAAGTCGGATTAGCTAGTTGGTGGGGTAAAGGCCTACCAAGGCGACGATCTGTAGCGGGTCTGAGAGGATGATCCGCCACACTGGGACTGAGACACGGCCCAG "Bacteria" "Proteobacteria" "Gammaproteobacteria" "Pseudomonadales" "Moraxellaceae" "Acineto…
GACGAACGCTGGCGGCATGCCTAACACATGCAAGTCGAACGGGGATAGAAATATCCTAGTGGCGAACGGGTGAGTAACACGTGAGCAACCTGCCTACTACAACGGGATAACACAAAGAAATTTGTGCTAATACGGTATAAGACCACGGTACCGAATGGTACAGGGGTAAAAGCGATTTAGCGGTAGTAGATGGGCTCGCGTCCCATTAGTTAGTTGGTGAGGTAACGGCCCACCAAGACCGCGATGGGTAGCCGACCTGAGAGGGTGATCGGCCACACTGGGACTGAGACACGGCCCAG "Bacteria" "Firmicutes" "Clostridia" "Clostridiales" "Clostridiales_vadinBB60_group" NA NA
GATGAACGCTGGCGGCGTGCTTAACACATGCAAGTCGAACGGACTCATATTGAAACCTAGTGATGTATGAGTTAGTGGCGGACGGGTGAGTAACGCGTGGAGAACCTGCCGTATACTGGGGGATAACACTTAGAAATAGGTGCTAATACCGCATAAGCGCACAGCTTCGCATGAAGCAGTGTGGAAAACAAAAAGCTAAAGCTTTTGGTGGTATACGATGGATCCGCGTCTGATTAGCTAGTTGGCGGGGTAAAGGCCCACCAAGGCGACGATCAGTAGCCGGCCTGAGAGGGTGAACGGCCACATTGGGACTGAGACACGGCCCAA "Bacteria" "Firmicutes" "Clostridia" "Clostridiales" "Lachnospiraceae" …
GATGAACGCTAGCTACAGGCTTAACACATGCAAGTCGAGGGGCAGCATGGTCTTAGCTTGCTAAGGCCGATGGCGACCGGCGCACGGGTGAGTAACACGTATCCAACCTGCCGTCTACTCTTGGACAGCCTTCTGAAAGGAAGATTAATACAAGATGGCATCATGAGTTCACATGTTCACATGATTAAAGGTATTCCGGTAGACGATGGGGATGCGTTCCATTAGATAGTAGGCGGGGTAACGGCCCACCTAGTCTTCGATGGATAGGGGTTCTGAGAGGAAGGTCCCCCACATTGGAACTGAGACACGGTCCAA "Bacteria" "Bacteroidetes" "Bacteroidia" "Bacteroidales" "Bacteroidaceae" "Bacteroi…
GATGAACGCTGGCGGCGTGCTTAACACATGCAAGTCGAACGGGGGATGTACAGCGGGAAGATTTCGGTCGGACCAAGTGCATGCCTAGTGGCGGACGGGTGAGTAACGCGTGGGTAACCTGCCTTACACAGGGGGATAACACTTAGAAATAGGTGCTAATACCGCATGAGCGCACAGGACCGCATGGTCGAGTGTGAAAAACTGAGGTGGTGTAAGATGGACCCGCGTCTGATTAGCTAGTTGGTGAGGTAATGGCCCACCAAGGCGACGATCAGTAGCCGGCCTGAGAGGGTGGACGGCCACATTGGGACTGAGACACGGCCCAA "Bacteria" "Firmicutes" "Clostridia" "Clostridiales" "Lachnospiraceae" "…
AGCGAACGCTGGCGGCAGGCTTAACACATGCAAGTCGAACGGGCTTCTTCGGAAGTCAGTGGCAGACGGGTGAGTAACACGTGGGAACGTGCCCTTCGGTTCGGAATAACTCAGGGAAACTTGAGCTAATACCGGATACGCCCTTTTGGGGAAAGGTTTACTGCCGAAGGATCGGCCCGCGTCTGATTAGCTTGTTGGTGGGGTAACGGCCTACCAAGGCGACGATCAGTAGCTGGTCTGAGAGGATGATCAGCCACACTGGGACTGAGACACGGCCCAG "Bacteria" "Proteobacteria" "Alphaproteobacteria" "Rhizobiales" "Beijerinckiaceae" "Methylobacterium" NA
GATGAACGCTGGCGGCGTGCCTAACACATGCAAGTCGAGCGAGAAGCTGATGACAGATACTTCGGTTGAAGGAGTCAGTGGAAAGCGGCGGACGGGTGAGTAACGCGTAGGCAACCTGCCCTTTGCACAGGGATAGCCATTGGAAACGATGATTAAAACCTGATAACACCATTTGGTTACATGAGCAGATGGTCAAAGATTTATCGGCAAAGGATGGGCCTGCGTCTGATTAGCTAGTTGGTAAGGTAACGGCTTACCAAGGCGACGATCAGTAGCCGACCTGAGAGGGTGAACGGCCACATTGGAACTGAGACACGGTCCAA "Bacteria" "Firmicutes" "Clostridia" "Clostridiales" "Family_XIII" NA NA
GATGAACGCTGGCGGCGTGCTTAACACATGCAAGTCGAGCGAAAATAATTGAGAGCTTGCTTTTGATTATTTTAGCGGCGGACGGGTGAGTAACGTGTGGGTAACCTGCCTTTTACTGGGGAATAATCACTGGAAACGGTGACTAATACCGCATACGGTTCTTGGAAGGCATCTTCTAGGAAAGAAAGGATTTATTCGGTAAAAGATGGGCCCGCATCTGATTAGCTAGTTGGTGAGATAACAGCCCACCAAGGCGACGATCAGTAGCCGACCTGAGAGGGTGACCGGCCACATTGGGACTGAGACACGGCCCAA "Bacteria" "Firmicutes" "Clostridia" "Clostridiales" "Lachnospiraceae" "ASF356" NA
ATTGAACGCTGGCGGCAGGCTTAACACATGCAAGTCGAACGGTAACATAAAGAAGCTTGCTTCTTTGATGACGAGTGGCGGACGGGTGAGTAATGCTTGGGAATCTAGCTTATGGAGGGGGATAACTACGGGAAACTGTAGCTAATACCGCGTAGTATCGAGAGATGAAAGTGTGGGACCTTCGGGCCACATGCCATAGGATGAGCCCAAGTGGGATTAGGTAGTTGGTGAGGTAAAGGCTCACCAAGCCGACGATCTCTAGCTGGTCTGAGAGGATGACCAGCCACACTGGGACTGAGACACGGCCCAG "Bacteria" "Proteobacteria" "Gammaproteobacteria" "Pasteurellales" "Pasteurellaceae" "Ha…
GATGAACGCTGGCGGCGTGCTTAACACATGCAAGTCGAACGATGAAGCCCAGCTTGCTGGGTGGATTAGTGGCGAACGGGTGAGTAACACGTGAGTAACCTGCCCTTAACTCTGGGATAAGCCTGGGAAACTGGGTCTAATACCGGATAGGAGCGTCCACCGCATGGTGGGTGTTGGAAAGATTTATCGGTTTTGGATGGACTCGCGGCCTATCAGCTTGTTGGTGAGGTAATGGCTCACCAAGGCGACGACGGGTAGCCGGCCTGAGAGGGTGACCGGCCACACTGGGACTGAGACACGGCCCAG "Bacteria" "Actinobacteria" "Actinobacteria" "Micrococcales" "Micrococcaceae" "Micrococcus" …
GATGAACGCTGGCGGCATGCCTAAGACATGCAAGTCGAACGAAGTAGTCCAATGAAGATGGAGTGCTTGCACAAAATTGGAATTGGGTTGCTACTTAGTGGCAGACGGGTGAGTAACACGTGGGTAACCTACCTTAGAGACTGGGATAACGGTTAGAAATGATCGCTAATACCGGATGATACGTAATTAGATAACTAGATACGTTAAAAGGAGCATTTGCTTCACTTTAAGATGGGCTTGCGTTGTATTAGCTAGTTGGTGGGGTAATGGCCTACCAAGGCAACGATGCATATCCGAGCTGAGAGGCTGATCGGACACACTGGGACTGAGACACGGCCCAG "Bacteria" "Tenericutes" "Mollicutes" "Mollicutes_RF39" N…
GATGAACGCTGGCGGCGTGCCTAACACATGCAAGTCGAACGGAGATATTGCTTGGAAGCTTTTCGGAGTGAAAGAGAACTATCTTAGTGGCGGACGGGTGAGTAACGCGTGGGCAACCTGCCTCATACAGGGGGATAGCATCGGGAAACTGGTGGTAAAACCGCATAAGCGCACGAAGACGCATGTTTTTGTGTGAAAAGGAGAAATCTGGTATGAGATGGACCCGCGTCTGATTAGCTAGTTGGAGTGGTAAAAGCACACCAAGGCGACGATCAGTAGCCGGCCTGAGAGGGTGGACGGCCACATTGGGACTGAGACACGGCCCAG "Bacteria" "Firmicutes" "Clostridia" "Clostridiales" "Lachnospiraceae" …
GATGAACGCTGGCGGCGTGCCTAACACATGCAAGTCGAGCGAAGCGCATAAGTTAGAATCTTCGGAGGAAGGCTTTTGTGACTGAGCGGCGGACGGGTGAGTAACGCGTGGGTAACCTGCCTTACACAGGGGGATAACAGTTAGAAATGACTGCTAATACCGCATAAGACCACAGTACTGCATGGTACAGTGGTAAAAACTGAGGTGGTGTAAGATGGACCCGCGTCTGATTAGGTAGTTGGTGGGGTAACGGCCCACCAAGCCGACGATCAGTAGCCGGCCTGAGAGGGTGGACGGCCACATTGGGACTGAGACACGGCCCAG "Bacteria" "Firmicutes" "Clostridia" "Clostridiales" "Lachnospiraceae" "La…
GATGAACGCTGGCGGCGTGCTTAACACATGCAAGTCGAACGAGAATCAGTGGATTGAGGATTCGTCCAAATGAAACTGAGGAAAGTGGCGGACGGGTGAGTAACGCGTGAGCAATCTGCCTTGGAGTGGGGAATAACGGCTGGAAACAGCCGCTAATACCGCATGATACAGTTGGGAGGCATCTCTCTGACTGTCAAAGATTTATCGCTCTGAGATGAGCTCGCGTCTGATTAGCTGGTTGGCGGGGTAACGGCCCACCAAGGCGACGATCAGTAGCCGGACTGAGAGGTTGGCCGGCCACATTGGGACTGAGACACGGCCCAG "Bacteria" "Firmicutes" "Clostridia" "Clostridiales" "Ruminococcaceae" NA …
ATTGAACGCTGGCGGCATGCTTTACACATGCAAGTCGAACGGCAGCGCGGGGAGCTTGCTCCCTGGCGGCGAGTGGCGCACGGGTGAGTAATACATCGGAACGTGTCTTCTAGTGGGGGATAACTGCCCGAAAGGGCAGCTAATACCGCATGAGACCTGAGGGTGAAAGCGGGGGATCGCAAGACCTCGCGCTGGAAGAGCGGCCGATGTCCGATTAGCTAGTTGGTGAGGTAAAGGCTCACCAAGGCGACGATCGGTAGCTGGTCTGAGAGGACGACCAGCCACACTGGGACTGAGACACGGCCCAG "Bacteria" "Proteobacteria" "Gammaproteobacteria" "Betaproteobacteriales" "Burkholderiacea…
GATGAACGCTGGCGGCGTGCTTAACACATGCAAGTCGAACGAGAACCATCGGATCGAGGATTCGTCCAAGTGAAGGTGGGGAAAGTGGCGGACGGGTGAGTAACGCGTGAGCAATCTGCCTTGGAGTGGGGAATAACGGCTGGAAACAGCCGCTAATACCGCATGATACAGCTGGGAGGCATCTCCCTGGCTGTCAAAGATTTATCGCTCTGAGATGAGCTCGCGTCTGATTAGCTAGTTGGCGGGGTAACGGCCCACCAAGGCGACGATCAGTAGCCGGACTGAGAGGTTGGCCGGCCACATTGGGACTGAGACACGGCCCAG "Bacteria" "Firmicutes" "Clostridia" "Clostridiales" "Ruminococcaceae" NA …
GATGAACGCTGGCGGCGTGCCTAACACATGCAAGTCGAACGGAGACGGACCTGGAAGTAACAGTTTACTGTAACGGAAAGATCTGTCTTAGTGGCGGACGGGTGAGTAACGCGTGGGCAACCTGCCCTGTACCGGGGGATAACACTTAGAAATAGGTGCTAATACCGCATAATAAGGAAGACCGCATGGTGATCCTTTGAAAACTCCGGTGGTACAGGATGGGCCCGCGTCTGATTAGCCAGTTGGCGGGGTAACGGCCCACCAAAGCGACGATCAGCAGCCGGCCTGAGAGGGTGGACGGCCACACTGGGACTGAGACACGGCCCAG "Bacteria" "Firmicutes" "Clostridia" "Clostridiales" "Lachnospiraceae"…
GATGAACGCTGGCGGCGTGCCTAACACATGCAAGTCGAGCGAAGCACTTAAAATGGATTCTTCGGATGAAGCTTTATGTGACTGAGCGGCGGACGGGTGAGTAACGCGTGGGCAACCTGCCTTACACAGGGGGATAACAGTTAGAAATGACTGCTAATACCGCATAAGACCACAGGACTGCATGGTCCGGTGGTAAAAACTCCGGTGGTGTAAGATGGGCCCGCGTCTGATTAGGTAGTTGGCGGGGTAACGGCCCACCAAGCCGACGATCAGTAGCCGACCTGAGAGGGTGACCGGCCACATTGGGACTGAGACACGGCCCAG "Bacteria" "Firmicutes" "Clostridia" "Clostridiales" "Lachnospiraceae" "La…
GATGAACGCTGGCGGCGTGCCTAACACATGCAAGTCGAGCGAAGCACAAGAATACGATTCTTCGGATGAAGATTCCTGTGACTGAGCGGCGGACGGGTGAGTAACGCGTGGGTAACCTGCCTTACACAGGGGGATAACAGTTAGAAATGACTGCTAATACCGCATAAGACCACAGTACTGCATGGTACAGTGGTAAAAACTGAGGTGGTGTAAGATGGACCCGCGTCTGATTAGGTAGTTGGTGGGGTAACGGCCCACCAAGCCGACGATCAGTAGCCGGCCTGAGAGGGTGGACGGCCACATTGGGACTGAGACACGGCCCAG "Bacteria" "Firmicutes" "Clostridia" "Clostridiales" "Lachnospiraceae" "La…
GATGAACGCTGGCGGCGTGCTTAACACATGCAAGTCGAACGAAGCAAGAAGCGAAGCGCAAGCAGAGGTTCTTGACTGAGTGGCGGACGGGTGAGTAACGCGTGGATAACCTGCCTTTCACAGGGGGATAACAGCTGGAAACGGCTGCTAATACCGCATGAGCCTCTTTTGTCGCATGAGAAGAGAGGGAAAGAGAAATCGGTGAGAGATGGATCCGCGTCCGATTAGCTAGTTGGAGGGGTAACAGCCCACCAAGGCGACGATCGGTAGCCGACCTGAGAGGGTGGACGGCCACATTGGGACTGAGACACGGCCCAA "Bacteria" "Firmicutes" "Clostridia" "Clostridiales" "Lachnospiraceae" NA NA
GATGAACGCTGGCGGCGTGCTTAACACATGCAAGTCGAACGGAGATATCATTTTCGAAGCGATTAGTTTACTAAGAGCGGAGATGTTGCTATCTTAGTGGCGGACGGGTGAGTAACGCGTGGGTAACCTGCCTTGCACTGGGGGATAACACTTAGAAATAGGTGCTAATACCGCATAACAGGAGAAGACGCATGTCTTTTCCTTAAAAACTCCGGTGGTGTAAGATGGACCCGCGTCTGATTAGCTTGTTGGCGGGGTAACGGCCCACCAAGGCAACGATCAGTAGCCGGCCTGAGAGGGTGAACGGCCACATTGGGACTGAGACACGGCCCAA "Bacteria" "Firmicutes" "Clostridia" "Clostridiales" "Lachnospir…
GATGAATGCTGGCGGCGTGCCTAATACATGCAAGTCGAGCGGTAGCAGGGCTTCACCGTGTTTTCGAGGCTTCGGGCTGTTGAGCGGAAGTTTCAATCGAAGACACAGTGAAGCTGCTGACGAGCGGCGGACGGCTGAGTAACGCGTGGGAACATACCCCAAACTGAGGGATAACTAGTCGAAAGATTAGCTAATACCGCATGTGATCTTCGGATTAAAGCTTTCGGGCGGTTTGGGAATGGCCTGCGTACGATTAGATAGTTGGTGAGGTAAAGGCTCACCAAGTCGACGATCGTTAGATGGTTTGAGAGGATGATCATCCAGACTGGGACTGAGACACGGCCCAG "Bacteria" "Patescibacteria" "Saccharimonadia" "Sac…
GATAAACGCTGGCGGCGCACATAAGACATGCAAGTCGAACGAACTTAATTCGAATGTTTACATTTGGAAGCGGTTAGTGGCGGACTGGTGAGTAACACGTAAGCAACCTGCCTATCAGAGGGGAATAACAGTGAGAAATCATTGCTAATACCGCATATGCTGTGAGTATCGCATGATACAAACAGGAAAGGAGTAATCCGCTGATAGATGGGCTTGCGTCTGATTAGATAGTTGGTGGGGTAACGGCCTACCAAGTCGACGATCAGTAGCCGGACTGAGAGGTTGAACGGCCACATTGGGACTGAGATACGGCCCAG "Bacteria" "Firmicutes" "Clostridia" "Clostridiales" "Ruminococcaceae" "Ruminococ…
GATGAACGCTGGCGGCGTGCCTAACACATGCAAGTCGAACGGACTTATAACGAAACCTAGTGAATTATAAGTTAGTGGCGGACGGGTGAGTAACGCGTGGAAAACCTGCCGTATACTGGGGGATAACACTTAGAAATAGGTGCTAATACCGCATAAGCGCACAGCTTTGCATGAAGCAGTGTGAAAAACTCCGGTGGTATACGATGGTTCCGCGTCTGATTAGCTAGTTGGTGAGGTAAAAGCCCACCAAGGCGACGATCAGTAGCCGGCCTGAGAGGGTGAACGGCCACATTGGGACTGAGACACGGCCCAG "Bacteria" "Firmicutes" "Clostridia" "Clostridiales" "Lachnospiraceae" "Lachnospirace…
GATGAACGCTGGCGGCATGCCTAAGACATGCAAGTCGAACGAGATGGCCCATTGAAGATTGAGTGCTTGCACAATTTCTGATTTGGATTTTCCATCTAGTGGCGGACGGGTGAGTAACACGTGGGTGACCTACCTTTGAGTTTGGGACAACTACTGGAAACGGTAGCTAATACCAAATAATATACAGTTTCGTTTCTGTATTAAAAGGCGCTTTCAAGCGTCGCTCTTAGATGGGCCTGCGGCGTATTAGCTAGTTGGTGAGGTAATGGCTCACCAAGGCGACGATGCGTAGCCGGACTGAGAGGTTGAACGGCCACATTGGGACTGAGACACGGCCCAA "Bacteria" "Tenericutes" "Mollicutes" "Mollicutes_RF39" NA…
GATGAACGCTGGCGGCGTGCTTAACACATGCAAGTCGAACGGAGTTATCATTTCAGAAGCAATTAGCTTGCTGAGAGTGGAAGAGAGGATAACTTAGTGGCGGACGGGTGAGTAACGCGTGGGGAACCTGCCCTGCACCGGGGGATAACACCTGGAAACAGGTGCTAATACCGCATAAGCGCACGAGGCCGCATGGCCAGGTGTGAAAAACTAAGGTGGTGCAGGATGGACCCGCGTCTGATTAGCTTGTTGGTAGGGTAACGGCCTACCAAGGCGACGATCAGTAGCCGGCCTGAGAGGGTGAACGGCCACATTGGGACTGAGACACGGCCCAA "Bacteria" "Firmicutes" "Clostridia" "Clostridiales" "Lachnospi…
GATGAACGCTGGCGGCGTGCCTAACACATGCAAGTCGAGCGAAGCACTTTAATTCGATTCTTCGGATGAAGATTTTTGTGACTGAGCGGCGGACGGGTGAGTAACGCGTGGGCAACCTGCCTTACACAGGGGGATAACAGTTAGAAATGACTGCTAATACCGCATAAGACCGCAGTACCGCATGGTACAGCGGTAAAAACTCCGGTGGTGTAAGATGGGCCCGCGTCTGATTAGGTAGTTGGCGGGGTAACGGCCCACCAAGCCGACGATCAGTAGCCGACCTGAGAGGGTGACCGGCCACATTGGGACTGAGACACGGCCCAG "Bacteria" "Firmicutes" "Clostridia" "Clostridiales" "Lachnospiraceae" "La…
GACGAACGCTGGCGGCGTGCTTAACACATGCAAGTCGAACGGAGTGCCCATGAAAGAGATTTCGGTCAATGGAGTGGGTTACTTAGTGGCGGACGGGTGAGTAACGCGTGAGGAACCTGCCTTTCAGAGGGGGACAACAGTTGGAAACGACTGCTAATACCGCATAATATATTGTTGCCGCATGGCAATGATATCAAAGATTTATCGCTGAAAGATGGCCTCGCGTCTGATTAGCTAGTTGGTAGGGTAACGGCCTACCAAGGCGACGATCAGTAGCCGGACTGAGAGGTTGGCCGGCCACATTGGGACTGAGATACGGCCCAG "Bacteria" "Firmicutes" "Clostridia" "Clostridiales" "Ruminococcaceae" "Ru…
GATGAACGCTGGCGGCGTGCCTAACACATGCAAGTCGAGCGAAGCGCTTTAATTGGATTCTTCGGATGAAGATTTTTGTGACTGAGCGGCGGACGGGTGAGTAACGCGTGGGCAACCTGCCTTACACAGGGGGATAACAGTCAGAAATGACTGCTAATACCGCATAAGACCGCAGGACCGCATGGTCCGGTGGTAAAAACTCCGGTGGTGTAAGATGGGCCCGCGTCTGATTAGGTGGTTGGCGGGGTAACGGCCCACCAAGCCGACGATCAGTAGCCGACCTGAGAGGGTGACCGGCCACATTGGGACTGAGACACGGCCCAG "Bacteria" "Firmicutes" "Clostridia" "Clostridiales" "Lachnospiraceae" "La…
GATGAACGCTGGCGGCGTGCTTAACACATGCAAGTCGAACGGGGCGGCGGGGAGGAATCCCTTCGGGGAGGAGACCCCGCGGCCTAGTGGCGGACGGGTGAGTAACGCGTGGGCAACCTGCCCCATACCGGGGGATAACAGCCGGAAACGGCTGCTAACACCGCATAAGCGCTGGGGGCCGCATGGCTCCCAGCGGAAAACTCCGGTGGTATGGGATGGGCCCGCGTCTGATTAGGCAGTTGGCGGGGCAGCGGCCCACCAAACCGACGATCAGTAGCCGGCCTGAGAGGGCGGCCGGCCACATTGGGACTGAGACACGGCCCAG "Bacteria" "Firmicutes" "Clostridia" "Clostridiales" "Lachnospiraceae" NA…
GATGAACGCTGGCGGCGTGCCTAACACATGCAAGTCGAACGAAGCCCCCTGCACGAATTCTTCGGGAGGAGTGTGGGGGAGCTTAGTGGCGGACGGGTGAGTAACGCGTGGGCAACCTGCCCCATACAGGGGGATAACAGCCGGAAACGGCTGCTAATACCGCATAAGCGCACAGCGCCGCATGGCGGGGTGTGAAAAACTCCGGTGGTATGGGATGGGCCCGCGTCTGATTAGCCGGTTGGCGGGGTAACGGCCCACCAAAGCAACGATCAGTAGCCGGCCTGAGAGGGTGGACGGCCACATTGGGACTGAGAGACGGCCCAG "Bacteria" "Firmicutes" "Clostridia" "Clostridiales" "Lachnospiraceae" NA …
GACGAACGCTGGCGGCGTGCCTAACACATGCAAGTCGAGCGGAGACAGTGAGTAGCTTGCTATGAGCTGTTTTAGCGGCGGACGGGTGAGTAACGCGTGAGCAACCTTTCCCAGACAGGGGAATAACACACCGAAAGGTGTACTAATACCGCATAAGACCACGGAATCACATGGTTCTGGGGTAAAAGATTTATCGGTTTGGGGTGGGCTCGCGTCCGATTAGGTAGTTGGTGAGGTAACGGCCCACCAAGCCGACGATCGGTAGCCGACCTGAGAGGGTGATCGGCCACATTGGGACTGAGACACGGCCCAG "Bacteria" "Firmicutes" "Clostridia" "Clostridiales" "Christensenellaceae" "Christens…
GATGAACGCTGGCGGCGTGCTTAACACATGCAAGTCGAACGAAGCAGGAGGGTGCTTGCACCTTCCTGACTGAGTGGCGGACGGGTGAGTAACACGTGGATAATCTGCCCTGCACAGGGGGACAACAGCTAGAAATGGCTGCTAATACCGCATAAGCCTACAGCCTCGCATGAGGGAGTAGGAAAAGAAATTCGGTGCAGGATGAGTCCGCGTCTGATTAGCTAGTTGGAGGGGTAAGAGCCCACCAAGGCAACGATCAGTAGCCGGCCTGAGAGGGCGACCGGCCACATTGGGACTGAGACACGGCCCAA "Bacteria" "Firmicutes" "Clostridia" "Clostridiales" "Lachnospiraceae" NA NA
GATAAACGCTGGCGGCGCACATAAGACATGCAAGTCGAACGGAAGTCGTTGTAATGATTTTGACATGGACAGAGAACTTGTTCGAAGAAAGTGAAGATTGACTTACAACAATGGCTTTAGTGGCGGACTGGTGAGTAACGCGTGAGCAACCTGCCTGTTAGAGGGGAATAACAGTGAGAAATCATTGCTAATACCGCATATGCCATAGTTACCACATGGTAACAGTGGGAAAGGAGCAATCCGCTAACAGATGGGCTCGCGTCTGATTAGATAGTTGGTGGGGTAAAGGCCTACCAAGTCGACGATCAGTAGCCGGACTGAGAGGTTGAACGGCCACATTGGGACTGAGATACGGCCCAG "Bacteria" "Firmicutes" "Clostridia" "…
GATGAACGCTGGCGGCGTGCCTAATACATGCAAGTCGAACGCACCATTTCGGTGGTGAGTGGCGAACGGGTGAGTAAAAGATAAGTAACCTGCCCTAGGCAGGGGGATAACGACCGGAAACGGACGCTAAAACCGCATAGGCTGGGAGATCGCATGAGAATCCAGTTAAATGTCCTGAAAGGGACAGGCAAAGGAGGGACTTATCACGCATTAGCTAGTTGGTGGGGCAACGGCCTACCAAGGCGACGATGCGTAGCCGGCCTGAGAGGGCGGACGGCCACACTGGGACTGAGACACGGCCCAG "Bacteria" "Firmicutes" "Erysipelotrichia" "Erysipelotrichales" "Erysipelotrichaceae" "Erysipe…
GATGAACGCTGGCGGCGTGCTTAACACATGCAAGTCGAACGAAGTTATAGGAGAGCTTGCTCTAATATAACTTAGTGGCGGACGGGTGAGTAACGTGTGGGCAACCTACCTTTTACAGGGGAATAATCACTGGAAACGGTGACTAATACCGCATAATAGTATTACAAGGCATCTTGTGATAGGGAAAGGAGTAATCCGGTAAAAGATGGGCCCGCATCTGATTAGATAGTTGGTGAGATAACAGCCCACCAAGTCAACGATCAGTAGCCGACCTGAGAGGGTGACCGGCCACATTGGGACTGAGACACGGCCCAA "Bacteria" "Firmicutes" "Clostridia" "Clostridiales" "Lachnospiraceae" "Lachnospira…
GATGAACGCTGGCGGCGTGCTTAACACATGCAAGTCGAACGGAACACCCTAGAAGGAGTTTTCGGACAACTGATAGGACTGTTTAGTGGCGGACGGGTGAGTAACGCGTGAGTAACCTGCCTTGGAGTGGGGAATAACAGCTGGAAACAGCTGCTAATACCGCATAATATATCTGGGTCGCATGGCTCTGGATATCAAAGATTTATCGCTCTGAGATGGACTCGCGTCTGATTAGCTGGTTGGCGGGGTAACGGCCCACCAAGGCGACGATCAGTAGCCGGACTGAGAGGTTGGCCGGCCACATTGGGACTGAGACACGGCCCAG "Bacteria" "Firmicutes" "Clostridia" "Clostridiales" "Ruminococcaceae" "R…
GATGAACGCTGGCGGCGTGCCTAACACATGCAAGTCGAACGGAGTCATTAAGGAAAACTCTTCGGAGTCGGAATTCTTGACTTAGTGGCGGACGGGTGAGTAACGCGTGAGCAATCTGCCTTTGGATGTGGGATAACAGCTGGAAACGGCTGCTAATACCGCATAACGCATTCTGGCCGCATGACCGGGATGCCAAAGATTTATCGTCCAAAGATGAGCTCGCGTCTGATTAGCTGGTTGGCGGGGTAACGGCCCACCAAGGCGACGATCAGTAGCCGGACTGAGAGGTTGAACGGCCACATTGGGACTGAGACACGGCCCAG "Bacteria" "Firmicutes" "Clostridia" "Clostridiales" "Ruminococcaceae" "But…
GATAAACGCTGGCGGCGCACATAAGACATGCAAGTCGAACGGAAGTCGTTGTAATGATTTTGACATGGACAGAGAACTTGTTCGAAGAAAGTGAAGATTGACTTACAACAATGGCTTTAGTGGCGGACTGGTGAGTAACGCGTGAGCAACCTGCCTATTAGAGGGGAATAACAGTGAGAAATCATTGCTAATACCGCATATGCCATAACCATCACATGGTGGAAGTGGGAAAGGAGCAATCCGCTAATAGATGGGCTCGCGTCTGATTAGATAGTTGGTGGGGTAACGGCCTACCAAGTCAACGATCAGTAGCCGGACTGAGAGGTTGAACGGCCACATTGGGACTGAGATACGGCCCAG "Bacteria" "Firmicutes" "Clostridia" "…
GATGAACGCTGGCGGCGCATTTAAGACATGCAAGTCGAACGAAGAATTTCTACCGAACGGAAATGAAGATTTATCAGATTTGAAGTTCACCAGAAATTCTTAGTGGCGGACGGGTGAGTAATACGTAGATAATCTGCCTTTTAGAGGGAAATAACAGAGGGAAACTTCTGCTAATGTCCCATAAGACCACGCTATGGCATCATAGAGTGATCAAAGGAGCAATCCGCTAAAAGATGAGTCTACGGCTGATTAGCCAGTTGGTGGGGTAAGAGCCTACCAAAGCTATGATCAGTAGCCGAGCTGAGAGGCTGGCCGGCCACATTGGGACTGAGACACGGCCCAG "Bacteria" "Firmicutes" "Clostridia" "Clostridiales" "R…
GATAAACGCTGGCGGCGCACATAAGACATGCAAGTCGAACGAACTTAACTCATTCTTTTAGATTGAGAGCGGTTAGTGGCGGACTGGTGAGTAACGCGTAAGGAACCTGCCTTTTAGAGGGGAATAACAATGAGAAATCATTGCTAATACCGCATATGCCATAGTTATCACATGATAATAGTGGGAAAGGAGCAATTCGCTAAAAGATGGCCTTGCGTCTGATTAGATAGTTGGTAAGGTAACGGCTTACCAAGTCGACGATCAGTAGCCGGACTGAGAGGTTGAACGGCCACATTGGGACTGAGATACGGCCCAG "Bacteria" "Firmicutes" "Clostridia" "Clostridiales" "Ruminococcaceae" "Ruminococc…
GACGAACGCTGGCGGCGTGCCTAACACATGCAAGTCGAACGGAGATACCCGCTGATGAAGTACTTCGGTAATGATTCTTGGATATCTTAGTGGCGGACGGGTGAGTAACGCGTGAGCAACCTGCCTTTCAGAGGGGGATAACGTTTGGAAACGAACGCTAATACCGCATGATATTATTGAGCTGCATGGCTTGATAATCAAAGGAGCAATCCGCTGAAAGATGGGCTCGCGTCCGATTAGGTAGTTGGCGGGGCAACGGCCCACCAAGCCGACGATCGGTAGCCGGACTGAGAGGTTGAACGGCCACATTGGGACTGAGACACGGCCCAG "Bacteria" "Firmicutes" "Clostridia" "Clostridiales" "Ruminococcacea…
GATGAACGCTGGCGGCGTGCTTAACACATGCAAGTCGAACGAAGCATGGAAGACGGAATTTTTCGGAAGGAAGTCTTCTATGACTGAGTGGCGGACGGGTGAGTAACGCGTGGGTAACCTGCCTCATACAGGGGGATAACAGTTAGAAATGACTGCTAATACCGCATAAGACCACAGTGCCGCATGGCACAGGGGCCAAAGCCTTGACGGTATGAGATGGACCCGCGTCTGATTAGGTAGTTGGTGGGGTAACGGCCTACCAAGCCGACGATCAGTAGCCGACCTGAGAGGGTGACCGGCCACATTGGGACTGAGACACGGCCCAA "Bacteria" "Firmicutes" "Clostridia" "Clostridiales" "Lachnospiraceae" N…
GATAAACGCTGGCGGCGCACATAAGACATGCAAGTCGAACGGACTTAATTCGAATGTTTACATTTGAAAGCGGTTAGTGGCGGACTGGTGAGTAACACGTAAGCAACCTGCCTGTTAGAGGGGAATAACAGTGAGAAATCATTGCTAATACCGCATATGCCATAGTCATCACATGATGATAGTGGGAAAGGAGCAATCCGCTAACAGATGGGCTTGCGTCTGATTAGATAGTTGGTGGGGTAATGGCCTACCAAGTCGACGATCAGTAGCCGGACTGAGAGGTTGAACGGCCACATTGGGACTGAGATACGGCCCAG "Bacteria" "Firmicutes" "Clostridia" "Clostridiales" "Ruminococcaceae" "Ruminococ…
GATGAACGCTGGCGGCGTGCTTAACACATGCAAGTCGAACGAAGCAAGAAGCGAAGCGCAAGCAGAGGTTCTTGACTGAGTGGCGGACGGGTGAGTAACGCGTGGATAACCTGCCTTTCACAGGGGGATAACAGCTGGAAACGGTTGCTAATACCGCATGAGCCTCTTTTATCGCATGAGGAGAGAGGGAAAGAGAAATCGGTGAGAGATGGATCCGCGTCCGATTAGCTAGTTGGAGGGGTAACAGCCCACCAAGGCGACGATCGGTAGCCGACCTGAGAGGGTGGACGGCCACATTGGGACTGAGACACGGCCCAA "Bacteria" "Firmicutes" "Clostridia" "Clostridiales" "Lachnospiraceae" NA NA
GATGAACGCTGGCGGCGTGCTTAACACATGCAAGTCGAACGGAGATATCATTTTCGAAGCGATTAGTTTACTAAGAGCGGAGATGTTGCTATCTTAGTGGCGGACGGGTGAGTAACGCGTGGGTAACCTGCCTTGCACTGGGGGATAACACTTAGAAATAGGTGCTAATACCGCATAACAGTAGGAGACGCATGTCTTTTACTTGAAAACTCCGGTGGTGTAAGATGGACCCGCGTCTGATTAGCTTGTTGGCGGGGTAACGGCCCACCAAGGCGACGATCAGTAGCCGGCCTGAGAGGGTGAACGGCCACATTGGGACTGAGACACGGCCCAA "Bacteria" "Firmicutes" "Clostridia" "Clostridiales" "Lachnospir…
GATGAACGCTGGCGGCGTGCCTAACACATGCAAGTCGAGCGGAGATTATTGAGAGCTTGCTTTTGATAATCTTAGCGGCGGACGGGTGAGGAACACGTGGGTAATCTGCCCTTTGCAGAGGGATAACATCAAGAAATTGGTGCTAATACCTCATAAGCTCCCGTTATGGCATCATAAAGGGAGAAAAGATTAATCGGCAAAGGAGGGGCCCGCGGCTGATTAGCTAGTTGGAGAGGTAACGGCTCACCAAGGCGACGATCAGTAGCCGACCTGAGAGGGTGATCGGCCACATTGGAACTGAGAGACGGTCCAA "Bacteria" "Firmicutes" "Clostridia" "Clostridiales" "Lachnospiraceae" "Tyzzerella_3"…
GACGAACGCTGGCGGCGTGCCTAACACATGCAAGTCGAACGGAGATACGCGCTGAATGACGAAGCTTGCTTTTGAATTCTTGTGTATCTTAGTGGCGGACGGGTGAGTAACGCGTGAGCAACCTGCCTTTCAGAGGGGGATAACGTTTGGAAACGAACGCTAATACCGCATGAGACTACAGTACTACATGGTACAGTGGCCAAAGGAGCAATCCGCTGAAAGATGGGCTCGCGTCCGATTAGATAGTTGGCGGGGTAACGGCCCACCAAGTCGACGATCGGTAGCCGGACTGAGAGGTTGAACGGCCACATTGGGACTGAGACACGGCCCAG "Bacteria" "Firmicutes" "Clostridia" "Clostridiales" "Ruminococcac…
GACGAACGCTGGCGGCGTGCTTAACACATGCAAGTCGAACGGAGTGCCCCTGAAAGAGTTTTCGGACAATGGATGGGAACACTTAGTGGCGGACTGGTGAGTAACGCGTGAGGAACCTGCCTTCCAGAGGGGGACAACAGTTGGAAACGACTGCTAATACCGCATGATACATTTGAATCGCATGGTTTGAATGTCAAAGATTTATCGCTGGAAGATGGCCTCGCGTCTGATTAGCTAGTTGGTGAGGTAACGGCCCACCAAGGCGACGATCAGTAGCCGGACTGAGAGGTTGGCCGGCCACATTGGGACTGAGATACGGCCCAG "Bacteria" "Firmicutes" "Clostridia" "Clostridiales" "Ruminococcaceae" "Os…
GATGAACGCTGGCGGCGTGCTTAACACATGCAAGTCGAACGGGGGTGCCATTTTTGAAGCGGTTAGCTTGCTAAGCGTGGAAATGGTGGCAGCCCAGTGGCGGACGGGTGAGTAACGCGTGGGTAACCTGCCTTACACAGGGGGATAACACTTAGAAATAGGTGCTAATACCGCATAAGCGCACAGTACCGCGTGGTACGGTGTGAAAAACTCCGGTGGTGTAAGATGGACCCGCGTCTGATTAGCTTGTTGGCGGGGTAGTGGCCCACCAAGGCGACGATCAGTAGCCGGCCTGAGAGGGTGGACGGCCACATTGGGACTGAGACACGGCCCAA "Bacteria" "Firmicutes" "Clostridia" "Clostridiales" "Lachnospi…
GATGAACGCTGGCGGCGTGCTTAACACATGCAAGTCGAACGGAACTGTCATTTTTGAAGCAATTAGCTTGCTAAGGGTGGAAATGTTGGCAGTTTAGTGGCGGACGGGTGAGTAACGCGTGGGTAACCTGCCTTACACAGGGGGATAACACCTGGAAACAGGTGCTAATACCGCATAACAGGAAGAGGCGCATGCCACTTTCTTGAAAACTCCGGTGGTGTAAGATGGACCCGCGTCTGATTAGCTTGTTGGCGGGGTAACGGCCCACCAAGGCGACGATCAGTAGCCGGCCTGAGAGGGTGGACGGCCACATTGGGACTGAGACACGGCCCAA "Bacteria" "Firmicutes" "Clostridia" "Clostridiales" "Lachnospir…
GATGAACGCTGGCGGCGTGCTTAACACATGCAAGTCGAACGAGAATCAGTGGATCAAGGATTCGTCTGAGTGAAGCTGAGGAAAGTGGCGGACGGGTGAGTAACGCGTGAGCAATCTGCCTTGGAGTGGGGAATAACGGCTGGAAACAGCCGCTAATACCGCATGACGCGTCTGGGAGGCATCTCTCTGGACGCCAAAGATTTATCGCTCTGAGATGAGCTCGCGTCTGATTAGCTAGTTGGCGGGGTAACGGCCCACCAAGGCGACGATCAGTAGCCGGACTGAGAGGTTGGCCGGCCACATTGGGACTGAGACACGGCCCAG "Bacteria" "Firmicutes" "Clostridia" "Clostridiales" "Ruminococcaceae" NA …
GACGAACGCTGGCGGCGCGCCTAACACATGCAAGTCGAACGGGACTATGCGAGATGAAGTTTTCGGATGGAATTTTGTATAGTTTAGTGGCGGACGGGTGAGTAACACGTGAGCAACCTGCCTTCGAGAGGGGAATAACGGCTGGAAACGGTCGCTAATACCGCATAACATACGGGAGGGACATCCCTTTTGTATCAAAGATTTATCGCTCGAAGATGGGCTCGCGTCCGATTAGGTAGTTGGTGAGGTAACGGCCCACCAAGCCGACGATCGGTAGCCGGACTGAGAGGTTGAACGGCCACATTGGGACTGAGACACGGCCCAG "Bacteria" "Firmicutes" "Clostridia" "Clostridiales" "Ruminococcaceae" NA…
GATGAACGCTGGCGGCGTGCTTAACACATGCAAGTCGAACGGACTCATATTGAAACCTAGTGAAGTATGAGTTAGTGGCGGACGGGTGAGTAACGCGTGGAAAACCTGCCGTATACTGGGGGATAACACTTAGAAATAGGTGCTAATACCGCATAAGCGCACAGCTTCGCATGAAGCAGTGTGAAAAACTGAGGTGGTATACGATGGTTCCGCGTCTGATTAGCTAGTTGGTGGAGTAAAAGCCTACCAAGGCAACGATCAGTAGCCGGCCTGAGAGGGTGAACGGCCACATTGGGACTGAGACACGGCCCAA "Bacteria" "Firmicutes" "Clostridia" "Clostridiales" "Lachnospiraceae" "Lachnospirace…
GATGAACGCTGGCGGCGTGCTTAACACATGCAAGTCGAACGAAGCGCTACCGACGGAACTTTTCGGAGGGAAGATGGTAATGACTGAGTGGCGGACGGGTGAGTAACGCGTGGGTAACCTGCCTCACAGAGGGGGACAACAGCCGGAAACGGCTGCTAATACCGCATAACAAGGGATCTCCGCATGAAGGTTCCTTCAAAGATTTATCGCTGTGAGATGGACCCGCGTCTGATTAGCTAGTTGGCAGGGTAACGGCCTACCAAGGCGACGATCAGTAGCCGGCTTGAGAGAGTGAACGGCCACATTGGGACTGAGACACGGCCCAG "Bacteria" "Firmicutes" "Clostridia" "Clostridiales" "Lachnospiraceae" N…
GATGAACGCTGGCGGCGTGCCTAACACATGCAAGTCGAGCGAAGCGCTTGAATCTGATTCTTCGGATGAGGATTCTTGTGACTGAGCGGCGGACGGGTGAGTAACGCGTGGGCAACCTGCCTTACACAGGGGGATAACAGTTAGAAATGACTGCTAATACCGCATAAGACCGCAGTACCGCATGGTACAGCGGTAAAAACTCCGGTGGTGTAAGATGGGCCCGCGTCTGATTAGGTAGTTGGCGGGGTAACGGCCCACCAAGCCGACGATCAGTAGCCGACCTGAGAGGGTGACCGGCCACATTGGGACTGAGACACGGCCCAG "Bacteria" "Firmicutes" "Clostridia" "Clostridiales" "Lachnospiraceae" "La…
GACGAACGCTGGCGGCGTGCTTAACACATGCAAGTCGAACGGAGCACCCTTGAAGGAGTTTTCGGACAACGGAGAGGAATGCTTAGTGGCGGACTGGTGAGTAACGCGTGAGGAACCTGCCTTTCGGAGGGGGACAACAGTTGGAAACGACTGCTAATACCGCATGATACATTTGGGCCGCATGGTCTGAATGTCAAAGATTTATCGCCGAAAGATGGCCTCGCGTCTGATTAGCTAGTTGGTGGGGTAACGGCCCACCAAGGCGACGATCAGTAGCCGGACTGAGAGGTTGGCCGGCCACATTGGGACTGAGATACGGCCCAG "Bacteria" "Firmicutes" "Clostridia" "Clostridiales" "Ruminococcaceae" "Os…
GACGAACGCTGGCGGCGCGCCTAACACATGCAAGTCGAACGGGGTTATAGGAACAGCTTGCTGGGAATATAACTTAGTGGCGGACGGGTGAGTAACACGTGAGCAACCTGCCTTTCAGAGGGGAATAACGTTTGGAAACGAACGCTAATACCGCATAACATTGGGATATGGCATCATGACCCAATCAAAGATTTATCGCTGAAAGATGGGCTCGCGCCCGATTAGGTAGTTGGTGAGATAATAGCCCACCAAGCCGACGATCGGTAGCCGGACTGAGAGGTTGAACGGCCACATTGGGACTGAGACACGGCCCAG "Bacteria" "Firmicutes" "Clostridia" "Clostridiales" "Ruminococcaceae" "Negativibac…
GATGAACGCTGGCGGCGTGCCTAATACATGCAAGTCGAGCGAACAGACGAGGAGCTTGCTCCTCTGACGTTAGCGGCGGACGGGTGAGTAACACGTGGATAACCTACCTATAAGACTGGGATAACTTCGGGAAACCGGAGCTAATACCGGATAATATATTGAACCGCATGGTTCAATAGTGAAAGACGGTTTTGCTGTCACTTATAGATGGATCCGCGCCGCATTAGCTAGTTGGTAAGGTGACGGCTTACCAAGGCAACGATGCGTAGCCGACCTGAGAGGGTGATCGGCCACACTGGAACTGAGACACGGTCCAG "Bacteria" "Firmicutes" "Bacilli" "Bacillales" "Staphylococcaceae" "Staphylococcu…
GATAAACGCTGGCGGCGCACATAAGACATGCAAGTCGAACGAACTTAATTCGAATGTTTACATTTGGAAGCGGTTAGTGGCGGACTGGTGAGTAACACGTAAGCAACCTGCCTATCAGAGGGGAATAACAGTGAGAAATCATTGCTAATACCGCATATGCTGTGAGTAACGCATGTTACAAACAGGAAAGGAGTAATCCGCTGATAGATGGGCTTGCGTCTGATTAGATAGTTGGTGGGGTAAAGGCCTACCAAGTCGACGATCAGTAGCCGGACTGAGAGGTTGAACGGCCACATTGGGACTGAGATACGGCCCAG "Bacteria" "Firmicutes" "Clostridia" "Clostridiales" "Ruminococcaceae" "Ruminococ…
GATGAACGCTGGCGGCATGCCTAATACATGCAAGTCGAACGGAGTACATTTCACAGCTTGCTGAGGAATGAACTGAGTGGCGAACGGGTGAGTAACACGTAGGGAACCTGCCCATATACCCGGGATAACAAACGGAAACGTTTGCTAAAACCGGATAGGTAATTGGAAGGCATCTTCCGATTATGAAAGCAGCGACAGCTGTGGATATGGATGGACCTGCGGCGTATTAGCCAGTTGGCGGGGTAACGGCCCACCAAAGCGATGATACGTAGCCGGCCTGAGAGGGTAAACGGCCACATTGGGACTGAGACACGGCCCAA "Bacteria" "Firmicutes" "Erysipelotrichia" "Erysipelotrichales" "Erysipelotric…
GATGAACGCTGGCGGCGTGCTTAACACATGCAAGTCGAACGGAGTACCCCTGAAGGAGTTTTCGGACAACTGATGGGACTACTTAGTGGCGGACGGGTGAGTAACGCGTGAGTAACCTGCCTTGGAGTGGGGAATAACAGCTGGAAACAGCTGCTAATACCGCATAATATGTCTGTGTCGCATGGCACTGGACATCAAAGATTTATCGCTCTGAGATGGACTCGCGTCTGATTAGCTAGTTGGCGGGGTAACGGCCCACCAAGGCGACGATCAGTAGCCGGACTAAGAGGTTGGCCGGCCACATTGGGACTGAGACACGGCCCAG "Bacteria" "Firmicutes" "Clostridia" "Clostridiales" "Ruminococcaceae" "R…
GATGAACGCTGGCGGCGCATTTAAGACATGCAAGTCGAACGAAGAATTTCTACCGAACGGAAATGAAGATTTATCAGATTTGAAGTTCACCAGAAATTCTTAGTGGCGGACGGGTGAGTAATACGTAGATAATCTGCCTTTTAGAGGGAAATAACAGAGGGAAACTTCTGCTAATGTCCCATAAGACCACGCTGTGGCATCATAGAGTGATCAAAGGAGTAATCCGCTAAAAGATGAGTCTACGGCTGATTAGCCAGTTGGTGGGGTAAGAGCCTACCAAAGCTATGATCAGTAGCCGAGCTGAGAGGCTGGCCGGCCACATTGGGACTGAGACACGGCCCAG "Bacteria" "Firmicutes" "Clostridia" "Clostridiales" "R…
GATAAACGCTGGCGGTGCACATAAGACATGCAAGTCGAACGAACTTAATCTTTAGTTTACTATAGAAGCGGTTAGTGGCGGACTGGTGAGTAACGCGTAAGCAATCTGCCTATTAGAGGGGGATAACAGTGAGAAATCATTGCTAATACCGCATAAGCTGTGAATATCGCATGATAAAAGCAGAAAAGGAGAAATCCACTAATAGATGAGCTTGCGTCTGATTAGTTAGTTGGTGAGGTAACGGCCCACCAAGACGATGATCAGTAGCCGGACTGAGAGGTTAAACGGCCACATTGGGACTGAGATACGGCCCAG "Bacteria" "Firmicutes" "Clostridia" "Clostridiales" "Ruminococcaceae" "Ruminococca…
GATGAACGCTGGCGGCGTGCCTAACACATGCAAGTCGAACGGGCGCGGCGTGCGGGCAGGGCTTCGGCCCTGGCGGCGGCGCGCGAGTGGCGGACGGGTGAGTAACGCGTGGGCAACCTGCCCTGTACTGGGGGATAACACCTGGAAACAGGTGCTAATACCGCATAAGCGCGCGGTGCCGCATGGCGCTGCGCGGAAAACCCCGGTGGTACAGGATGGGCCCGCGTCTGATTAGCTGGTTGGCAGGGTAACGGCCTACCAAGGCGACGATCAGTAGCCGGCCTGAGAGGGTGGACGGCCACACTGGGACTGAGACACGGCCCAG "Bacteria" "Firmicutes" "Clostridia" "Clostridiales" "Lachnospiraceae" NA…
GATTAACGCTTGCGGCATGCCTAAGACATGCAAGTCGAACGAGAAGGCCCATTGATATAGTATGAAGTCTGAGTGCTTGCACAAAGATGGATTACTATTGATTTGGATTTTCCTTCTAGTGGCAAACGGGTGAGTAACACGTGGGTTACCTACCTTTAAGTTGGGGATATCACCTGGAAACGGGTAGTAATACCGAATGTGATCTACGGATTAAAGAAGCCTTTAAAGCTTCGCTTAAAGATGGGCCTGCGGTGCATTAGCTAGTTGGCGGGATAATAGCCCACCAAGGCGACGATGCATAGCCGAACTGAGAGGTTGATCGGCCACACTGGGACTGAGACACGGCCCAG "Bacteria" "Tenericutes" "Mollicutes" "Mollicute…
GACGAACGCTGGCGGCGTGCTTAACACATGCAAGTCGAACGGAGCGCCTATGAAGGAGATTTCGGTCAACGGATTAGGCTGCTTAGTGGCGGACGGGTGAGTAACGCGTGAGGAACCTGCCTTTCAGAGGGGGACAACAGTTGGAAACGACTGCTAATACCGCATAACACATAGGTGTCGCATGGCATTTATGTCAAAGATTTATCGCTGAAAGATGGCCTCGCGTCTGATTAGCTAGTTGGTAGGGTAACGGCCTACCAAGGCGACGATCAGTAGCCGGACTGAGAGGTTGGCCGGCCACATTGGGACTGAGATACGGCCCAG "Bacteria" "Firmicutes" "Clostridia" "Clostridiales" "Ruminococcaceae" "Ru…
GACGAACGCTGGCGGCGTGCTTAACACATGCAAGTCGAACGGAAAGGCCCTGCTTGCAGGGTACTCGAGTGGCGAACGGGTGAGTAACACGTGGGTGATCTGCCCTGCACTTCGGGATAAGCTTGGGAAACTGGGTCTAATACCGGATAGGAACCATCTTTAGTGTGGTGGTTGGAAAGTTTTTTCGGTGTAGGATGAGCTCGCGGCCTATCAGCTTGTTGGTGGGGTAATGGCCTACCAAGGCGGCGACGGGTAGCCGGCCTGAGAGGGTGTACGGCCACATTGGGACTGAGATACGGCCCAG "Bacteria" "Actinobacteria" "Actinobacteria" "Corynebacteriales" "Corynebacteriaceae" "Coryneb…
GACGAACGCTGGCGGCGCGCCTAACACATGCAAGTCGAACGGGAATTTATCGACAGAAGCCTTCGGGTGGAAGATGATAAATTTTAGTGGCGGACGGGTGAGTAACACGTGAGCAACCTACCTATGAGAGGGGGATAACGTCCTGAAAAGGACGCTAATACCGCATAACCCGACTGGATGGCATCATCTGGTTGGCAAAGGAGCAATCCGCTGATAGATGGGCTCGCGGCCGATTAGGTAGTTGGTGGGGTAAAGGCCTACCAAGCCGACGATCGGTAGCCGGACTGAGAGGTTGAACGGCCACATTGGGACTGAGACACGGCCCAG "Bacteria" "Firmicutes" "Clostridia" "Clostridiales" "Ruminococcaceae" …
GATGAACGCTGGCGGCGTGCTTAACACATGCAAGTCGAACGAAGCATTTACACGGAATCCCTCGGGAGGAAGTGTGAATGACTGAGTGGCGGACGGGTGAGTAACGCGTGGGCAACCTGCCCCGTACCGGGGGATAACAGCCGGAAACGGCTGCTAATACCGCATATGCTTTGCGGGCCGCATGGCCCGCAAAGCAAAACTCCGGTGGTACGGGATGGGCCCGCGTCTGATTAGCTGGTTGGCGGGGTAACGGCCCACCAAGGCGACGATCAGTAGCCGGCCTGAGAGGGCGGCCGGCCACATTGGGACTGAGACACGGCCCAG "Bacteria" "Firmicutes" "Clostridia" "Clostridiales" "Lachnospiraceae" "Ro…
GATGAACGCTGGCGGCGTGCTTAACACATGCAAGTCGAACGGAGTACCCTTGAAGGAGTTTTCGGACAACTGATAGGACTACTTAGTGGCGGACGGGTGAGTAACGCGTGAGTAACCTGCCTTGGAGTGGGGAATAACAGCTGGAAACAGCTGCTAATACCGCATGATGCAGTTGGGTCGCATGGCTCTGACTGCCAAAGATTTATCGCTCTGAGATGGACTCGCGTCTGATTAGCTAGTTGGCGGGGCAACGGCCCACCAAGGCGACGATCAGTAGCCGGACTGAGAGGTTGGCCGGCCACATTGGGACTGAGACACGGCCCAG "Bacteria" "Firmicutes" "Clostridia" "Clostridiales" "Ruminococcaceae" "R…
GATGAACGCTGGCGGCGTGCTTAACACATGCAAGTCGAACGGAGATATCATTTTCGAAGCGATTAGTTTACTAAGAGCGGAGATGCTGCTATCTTAGTGGCGGACGGGTGAGTAACGCGTGGGTAACCTGCCTTACACTGGGGGATAACACTTAGAAATAGGTGCTAATACCGCATAACAGGAGAAGACGCATGTCTTTTCCTTAAAAACTCCGGTGGTGTAAGATGGACCCGCGTCTGATTAGCTTGTTGGCGGGGTAACGGCCCACCAAGGCGACGATCAGTAGCCGGCCTGAGAGGGTGAACGGCCACATTGGGACTGAGACACGGCCCAA "Bacteria" "Firmicutes" "Clostridia" "Clostridiales" "Lachnospir…
GATGAATGCTGGCGGCGTGCCTAATACATGCAAGTCGAGCGGTAGCAGGGCTTCACCGTTCTCTTGTCGCACTTGGCCTTTGAGCAAGTGGTCTGGATACGAGGGAACAGTGAAGCTGCTGACGAGCGGCGGACGGCTGAGTAACGCGTGGGAACATACCCTAAAGTGAGGGATAACTACTCGAAAGAGTGGCTAATACCGCATATGATCTTCGGATTAAAGCATTTATGCGCTTTAGGAATGGCCTGCGTACGATTAGATAGTTGGTGAGGTAAAGGCTCACCAAGTCGACGATCGTTAGATGGTTTGAGAGGATGATCATCCAGACTGGGACTGAGACACGGCCCAG "Bacteria" "Patescibacteria" "Saccharimonadia" "S…
GATGAACGCTGGCGGCGTGCTTAACACATGCAAGTCGAGCGGAAGCAAAGACACGGAATTTTTCGGAAGGAAGTGTGTTTGCTTTAGCGGCGGACGGGTGAGTAACGCGTGGATAACCTACCTCATACAGGGGGATAACAGTTAGAAATGACTGCTAATACCGCATAAGCACACGGGAGCGCATGCTTCCGGGTGAAAAGCTCCGGCGGTATGAGATGGATCCGCGTCTGATTAGCTGGTTGGCGGGGTAACGGCCCACCAAGGCGACGATCAGTAGCCGACCTGAGAGGGTGGCCGGCCACATTGGGACTGAGACACGGCCCAA "Bacteria" "Firmicutes" "Clostridia" "Clostridiales" "Lachnospiraceae" NA…
AGCGAACGCTGGCGGCATGCTTAACACATGCAAGTCGCACGGGCAGCAATGTCAGTGGCGGACGGGTGAGTAACGCGTAGGAACGTGTCCTGAGGTGGGGGACAACCCCGGGAAACTGGGGCTAATACCGCATATGGGCTGAGGCCCAAAGCCGAGAGGCGCCTTTGGAGCGGCCTGCGTCCGATTAGGTAGTTGGTGGGGTAAAGGCCTACCAAGCCTGCGATCGGTAGCTGGTCTGAGAGGACGACCAGCCACACTGGGACTGAGACACGGCCCAG "Bacteria" "Proteobacteria" "Alphaproteobacteria" "Acetobacterales" "Acetobacteraceae" "Roseomonas" NA
GATGAACGCTGGCGGCGTGCTTAACACATGCAAGTCGAACGAAGCGAGAACTAAAGCGCAAGCAGAGGTTCTTGACTGAGTGGCGGACGGGTGAGTAACGCGTGGATAACCTGCCTTTCACAGGGGGATAACAGCTGGAAACGGTTGCTAATACCGCATGAGTCTCTTTTGTCGCATGACGGGAGAGGGAAAGAGAAATCGGTGAGAGATGGATCCGCGTCCGATTAGCTAGTTGGAGGGGTAACAGCCCACCAAGGCGACGATCGGTAGCCGACCTGAGAGGGTGGACGGCCACATTGGGACTGAGACACGGCCCAA "Bacteria" "Firmicutes" "Clostridia" "Clostridiales" "Lachnospiraceae" NA NA
GATGAACGCTGGCGGCGTGCTTAACACATGCAAGTCGAACGGGGCGGCGGGGAGGAATCCCTTCGGGGAGGAGACCCCGCGGCCTAGTGGCGGACGGGTGAGTAACGCGTGGGCAACCTGCCCCATACCGGGGGATAACAGCCGGAAACGGCTGCTAACACCGCATAAGCGCTGGGGGCCGCATGGCTCCCGGCGGAAAACTCCGGTGGTATGGGATGGGCCCGCGTCTGATTAGGCAGTTGGCGGGGCAGCGGCCCACCAAACCGACGATCAGTAGCCGGCCTGAGAGGGCGGCCGGCCACATTGGGACTGAGACACGGCCCAG "Bacteria" "Firmicutes" "Clostridia" "Clostridiales" "Lachnospiraceae" NA…
GATGAACGCTGGCGGCGTGCCTAACACATGCAAGTCGAACGGGTGTACGGGAAGGAAGATTTCGGTCGGAAGCCCCGTGCATGAGTGGCGGACGGGTGAGTAACGCGTGGGCAACCTGCCCTGTACAGGGGGACAACACTTAGAAATAGGTGCTAATACCGCATAACGGGGGGAGCCGCATGGCACCCCCCTGAAAACTCCGGTGGTACAGGATGGGCCCGCGTCTGATTAGCTGGTTGGCAGGGTAACGGCCTACCAAGGCGACGATCAGTAGCCGGCCTGAGAGGGCGGACGGCCACACTGGGACTGAGACACGGCCCAG "Bacteria" "Firmicutes" "Clostridia" "Clostridiales" "Lachnospiraceae" "Lach…
GATAAACGCTGGCGGCGCACATAAGACATGCAAGTCGAACGGAAGTCGTTACAAAAATGAGTGAAGATTTATCGGAATGAGTTTTTGTAACAATGGCTTTAGTGGCGGACTGGTGAGTAATACATAAGCAACCTGCCTATTAGAGGGGGACAACAGTTAGAAATGACTGCTAATACCGCATATGCCATAGAGAAGACATCTTCTCAGTGGGAAAGAAGAAATTCGCTAATAGATGGGCTTATGGCTGATTAGCTAGTTGGTGGGGTAAAGGCCTACCAAGGCGACGATCAGTAGCCGGACTGAGAGGTTCAACGGCCACATTGGGACTGAGATACGGCCCAG "Bacteria" "Firmicutes" "Clostridia" "Clostridiales" "Ru…
GATGAACGCTGGCGGCGTGCTTAACACATGCAAGTCGAACGAAGCACCCCATCCGAAAGCGGAAGCAGCTTGCTGCGGAAGATTTCACCCGGGGTGACTGAGTGGCGGACGGGTGAGTAACGCGTGGGTAACCTGCCCCATAGAGGGGGACAACAGTTGGAAACGACTGCTAATACCGCATAGTAAGGAACTGCCGCATGACGGTTTCTTGAAAGATTTATCGCTATGGGATGGACCCGCGTCTGATTAGCTAGTTGGTAAGGTAACGGCTTACCAAGGCGACGATCAGTAGCCGGCTTGAGAGAGTGAACGGCCACATTGGGACTGAGACACGGCCCAA "Bacteria" "Firmicutes" "Clostridia" "Clostridiales" "Lach…
ATTGAACGCTGGCGGCAGGCCTAACACATGCAAGTCGAGCGGATGAAGGGAGCTTGCTCCCTGATTTAGCGGCGGACGGGTGAGTAATGCCTAGGAATCTGCCTGGTAGTGGGGGATAACGTTCCGAAAGGAACGCTAATACCGCATACGTCCTACGGGAGAAAGCAGGGGACCTTCGGGCCTTGCGCTATCAGATGAGCCTAGGTCGGATTAGCTAGTTGGTGAGGTAATGGCTCACCAAGGCGACGATCCGTAACTGGTCTGAGAGGATGATCAGTCACACTGGAACTGAGACACGGTCCAG "Bacteria" "Proteobacteria" "Gammaproteobacteria" "Pseudomonadales" "Pseudomonadaceae" "Pseudo…
GATGAACGCTGGCGGCGTGCTTAACACATGCAAGTCGAGCGAAGCACTTTTTTAGAACTCTTCGGAGGGAAGAGAGGGTGACTTAGCGGCGGACGGGTGAGTAACGCGTGGGCAACCTGCCTTACACAGGGGGATAACAATTAGAAATGATTGCTAATACCGCATAAGACCCCAGTGCCGCATGGTACAGGGGTAAAAACTGAGGTGGTGTAAGATGGGCCCGCGTCTGATTAGGTAGTTGGTGGGGTAGAAGCCTACCAAGCCGACGATCAGTAGCCGACCTGAGAGGGCGACCGGCCACATTGGGACTGAGACACGGCCCAA "Bacteria" "Firmicutes" "Clostridia" "Clostridiales" "Lachnospiraceae" "La…
GATGAACGCTGGCGGCGTGCCTAACACATGCAAGTCGAACGGGCATGCGCATGAAACCTAGTGATTGCGCATGCGAGTGGCGGACGGGTGAGTAACGCGTGGACAACCTGCCGCATGCAGGGGGATACCGGCTGGAAACAGCCGCTAATACCGCATATGCGCACAGCGCCGCATGGCGCAGTGCGGAAAGGGAGCAATCCCGGCATGCGATGGGTCCGCGTCCGATTAGCTTGTTGGCGGGGCAGCGGCCCACCAAGGCGACGATCGGTAGCCGGCCTGAGAGGGCGGACGGCCACATTGGGACTGAGACACGGCCCAG "Bacteria" "Firmicutes" "Clostridia" "Clostridiales" "Lachnospiraceae" NA NA
ATTGAACGCTGGCGGCAGGCTTAACACATGCAAGTCGAGCGGGCGATGTTGCTTCGGTAACTGAGCTAGCGGCGGACGGGTGAGTAAAGCTTAGGAATCTGCCTATTAGTGGGGGACAACATTTCGAAAGGGATGCTAATACCGCATACGTCCTACGGGAGAAAGCAGGGGATCACTTGTGACCTTGCGCTAATAGATGAGCCTAAGTCGGATTAGCTAGTTGGTGGGGTAAAGGCCTACCAAGGCGACGATCTGTAGCGGGTCTGAGAGGATGATCCGCCACACTGGGACTGAGACACGGCCCAG "Bacteria" "Proteobacteria" "Gammaproteobacteria" "Pseudomonadales" "Moraxellaceae" "Acineto…
GATGAATGCTGGCGGCGTGCCTAATACATGCAAGTCGAGCGGTAGCAGGGCTTCACCGTGTTCTTGATGCTCCGGGCTGTTTTTATAGCGGGAGTTCATTTCGAGAACGCAGTGAAGCTGCTGACGAGCGGCGGACGGCTGAGTAACGCGTGGGAACATACCCCAAACTGAGGGATAACTACTCGAAAGAGTGGCTAATACCGCATGTGATCTTCGGATTAAAGGATTTATCCGGTTTGGGAATGGCCTGCGTACGATTAGATAGTTGGCGAGGTAAAGGCTCACCAAGTCGACGATCGTTAGATGGTTTGAGAGGATGATCATCCAGACTGGGACTGAGACACGGCCCAG "Bacteria" "Patescibacteria" "Saccharimonadia" …
ATTGAACGCTGGCGGCATGCCTTACACATGCAAGTCGAACGGCAGCGCGGGAGCAATCCTGGCGGCGAGTGGCGAACGGGTGAGTAATATATCGGAACGTGCCCAGTAGTGGGGGATAGCCCGGCGAAAGCCGGATTAATACCGCATACGACCTGAGGGTGAAAGCGGGGGATCGCAAGACCTCGCGCTACTGGAGCGGCCGATATCAGATTAGCTAGTTGGTGGGGTAAAGGCCTACCAAGGCAACGATCTGTAGTTGGTCTGAGAGGACGACCAGCCACACTGGGACTGAGACACGGCCCAG "Bacteria" "Proteobacteria" "Gammaproteobacteria" "Betaproteobacteriales" "Burkholderiaceae" "…
GATGAACGCTGGCGGCGCATTTAAGACATGCAAGTCGAACGAAAATACTCAATTTAAATTGAAGAAGAGATTTATCGAATTGGAAGTTTAGCCCGAGTATTTTAGTGGCGGACGGGTGAGTAATACGTAGGCAACCTGCCTTGAAGAGAGAAATAACTAAGAGAAATCTTAGCTAATGTCACATAAGACCACGCTATGGCATCATAGAGAGGTCAAAGGAGAAATCCGCTTCAAGATGGGCCTACGGCTGATTAGTTAGTTGGAGAGGTAATGGCTCACCAAGACGATGATCAGTAGCCGAGCTGAGAGGCTGGCCGGCCACATTGGGACTGAGATACGGCCCAG "Bacteria" "Firmicutes" "Clostridia" "Clostridiales" …
GATGAACGCTGGCGGCATGCCTAATACATGCAAGTCGAACGAAGTCTTTAGAAAGCTTGCTTTTAAAAGACTTAGTGGCGAACGGGTGAGTAACACGTAGGGAACCTGCCCATGTACCCGGGATAACAGATGGAAACGTCTGCTAAAACCGGATAGGTATAGACAAGGCATCTTGACTATATTAAAGGACCTTCGGGTGTGGACATGGATGGACCTGCGGCGTATTAGCCAGTTGGCGGGGTAACGGCCCACCAAAGCGATGATACGTAGCCGGCCTGAGAGGGTAGACGGCCACATTGGGACTGAGACACGGCCCAA "Bacteria" "Firmicutes" "Erysipelotrichia" "Erysipelotrichales" "Erysipelotricha…
GATGAACGCTAGCGGCAGGCTTAACACATGCAAGTCGAAGGGCAGCGGGGAGAGTGCTTGCACTCTCCGCCGGCGACTGGCGCACGGGTGAGTAACACGTATGCAACCTGCCCTCTTCAGGGGGACAACCTTCCGAAAGGGAGGCTAATCCCGCGTATATTCTTCCGGGGCATCCCGGGAGGAGGAAAGCTTAGGCGGAAGAGGATGGGCATGCGGCGCATTAGCTGGTTGGCGGGGTAACGGCCCACCAAGGCGACGATGCGTAGGGGTTCTGAGAGGAAGGTCCCCCACACTGGTACTGAGACACGGACCAG "Bacteria" "Bacteroidetes" "Bacteroidia" "Bacteroidales" "Muribaculaceae" NA NA
GATGAACGCTGGCGGCATGCCTAAGACATGCAAGTCGAACGAAACGGCCTATAGAAGATGGAGTGCTTGCACAAAATCGGAAATAGATATCCGTTTAGTGGCGAAAGGGTGAGTAACACGTGGGTAATCTGCCTTTGAGACTGGGATAACAATTAGAAATGATTGCTAATACCGGATGATATATAAGATAATACGTTATTTTATATTAAAAGGAGCCTTTAAAGCTTCACTTAAAGATGAGCCTGCGTCGTATTAGCTAGTTGGTAAGGTAAAGGCTTACCAAGGCAACGATGCGTAGCCGACCTGAGAGGGTGATCGGCCACATTGGGACTGAGACACGGCCCAA "Bacteria" "Tenericutes" "Mollicutes" "Mollicutes_RF…
GATGAACGCTGGCGGCGTGCCTAACACATGCAAGTCGAACGGGAACGTTTGAAGGAAGAAGTTTCGGCGGAATCCAGAAGCGTTTTAGTGGCGGACGGGTGAGTAACGCGTGGGCAACCTGCCTTACACAGGGGGATAACACTTAGAAATAGGTGCTAATACCGCATAAGCGCACAGCTTTGCATGAAGCAGTGTGAAAAACTCCGGTGGTGTAAGATGGACCCGCGTCTGATTAGCTGGTTGGCAGGGTAAAGGCCTACCAAGGCGACGATCAGTAGCCGGCCTGAGAGGGTGAACGGCCACATTGGGACTGAGACACGGCCCAG "Bacteria" "Firmicutes" "Clostridia" "Clostridiales" "Lachnospiraceae" "…
GACGAACGCTGGCGGCGTGCTTAACACATGCAAGTCGAGCGGGCGTAGCAATACGTCAGCGGCGGACGGGTGAGTAACGCGTGAGCAATCTGCCTCTACCAACGGGATAACACTTAGAAATAGGTGCTAATACCGTATAAGACCACGAGCTTGCATGGGCATGTGGTAAAAGCTCCGACGGGTAGAGATGAGCTCGCGTCCCATTAGCTAGTTGGTAGGGTAACGGCCTACCAAGGCGACGATGGGTAGCCGACCTGAGAGGGTGATCGGCCACATTGGAACTGAGAAACGGTCCAA "Bacteria" "Firmicutes" "Clostridia" "Clostridiales" "Clostridiales_vadinBB60_group" NA NA
GATGAACGCTGGCGGCGTGCTTAACACATGCAAGTCGAACGGGGATGCCATTTTTGAGGCGGTTAGTTTACTAAGCGCCAAGATGCCGGCATCTTAGTGGCGGACGGGTGAGTAACGCGTGGGTAACCTGCCTTATACAGGGGGATAACACTTAGAAATAGGTGCTAATACCGCATAAGCGCACGGGGCTGCATGGCCCAGTGTGAAAAACTCCGGTGGTATAAGATGGACCCGCGTCTGATTAGCTTGTTGGCGGGGTAACGGCCCACCAAGGCGACGATCAGTAGCCGGCCTGAGAGGGTGGACGGCCACATTGGGACTGAGACACGGCCCAA "Bacteria" "Firmicutes" "Clostridia" "Clostridiales" "Lachnospi…
GATGAACGCTGGCGGCGTGCCTAACACATGCAAGTCGAACGGATCCATATTGAAACCTAGTGATGTATGGATTAGTGGCGGACGGGTGAGTAACGCGTGGATAACCTGCCGTATACAGGGGGATAACACTTAGAAATAGGTGCTAATACCGCATAAGCGCACGGTTCCGCATGGAACAGTGTGAAAAACTCCGGTGGTATACGATGGATTCGCGTCTGATTAGCCAGTTGGCGGGGTAACGGCCCACCAAAGCGACGATCAGTAGCCGGCCTGAGAGGGTGAACGGCCACATTGGGACTGAGACACGGCCCAA "Bacteria" "Firmicutes" "Clostridia" "Clostridiales" "Lachnospiraceae" "Lachnospirace…
GATGAACGCTGGCGGCGTGCCTAACACATGCAAGTCGAACGGGGGCGGATTGAAACCTAGTGATATCCGCCCGAGTGGCGGACGGGTGAGTAACGCGTGGACAACCTGCCGCATGCAGGGGGATACCGGCTGGAAACAGCCGCTAATACCGCATATGCGCACGAGGGCCGCATGGCCCGGTGCGGAAAGGGAGCAATCCCGGCATGCGATGGGTCCGCGTCCGATTAGCTAGTTGGCGGGGCAGCGGCCCACCAAGGCGACGATCGGTAGCCGGCCTGAGAGGGCGGACGGCCACATTGGGACTGAGACACGGCCCAG "Bacteria" "Firmicutes" "Clostridia" "Clostridiales" "Lachnospiraceae" NA NA
GACGAACGCTGGCGGCGTGCTTCAAACATGCAAGTCGAACGGAGTGAGAGCGAGCTTGCTCGCTCTCACTTAGTGGCGGACTGGTGAGTAACGCGTGAGCAATCTGCCTATCAAAGGGGGATAACAGAGGGAAACTTCTGCTAATACCGCATAAGACCACGGTGGGGCATCCCACAGGGGTCAAAGGAGCAATCCGATGATAGATGAGCTTGCGTTTCATTAGCTAGTTGGTAAGGTAACGGCTTACCAAGGCGACGATGAATAGCCGATCTGAGAGGATGACCGGCCACACTGGGACTGAGATACGGCCCAG "Bacteria" NA NA NA NA NA NA
GATGAACGCTGGCGGCGTGCCTAACACATGCAAGTCGAACGGGTGTACGGGATGGAAGATTTCGGTCGGAAGCCCCGTGCATGAGTGGCGGACGGGTGAGTAACGCGTGGGCAACCTGCCCTGTACAGGGGGACAACACTTAGAAATAGGTGCTAATACCGCATAACGGGGGGAGCCGCATGGCTTTCCCCTGAAAACTCCGGTGGTACAGGATGGGCCCGCGTCTGATTAGCTGGTTGGCAGGGTAACGGCCTACCAAGGCGACGATCAGTAGCCGGCCTGAGAGGGCGGACGGCCACACTGGGACTGAGACACGGCCCAG "Bacteria" "Firmicutes" "Clostridia" "Clostridiales" "Lachnospiraceae" NA NA
GATGAACGCTGGCGGCATGCCTAAGACATGCAAGTCGAACGAGAAGGCCCAATGAAAGCGGAGTGCTTGCACAAAGCTGGATTTGGATTCCCTTCTAGTGGCAAACGGGTGAGTAACACGTGGGTCACCTACCTTTATGTTGGGGATAACAGTTGGAAACGATTGCTAATACCGAATGTGCTCTACGGAGTAAAGAAGCCTTTAAAGCTTCGCATAGAGATGGGCCTGCGGCGCATTAGCTTGTTGGTGGGGTAATGGCCTACCAAGGCAACGATGCGTAGCCGAACTGAGAGGTTAATCGGCCACACTGGGACTGAGACACGGCCCAG "Bacteria" "Tenericutes" "Mollicutes" "Mollicutes_RF39" NA NA NA
GATGAACGCTGGCGGCGTGCCTAATACATGCAAGTCGAGCGAACAGACAAGGAGCTTGCTCCTTTGACGTTAGCGGCGGACGGGTGAGTAACACGTGGGTAACCTACCTATAAGACTGGGATAACTTCGGGAAACCGGAGCTAATACCGGATAATATTTCGAACCGCATGGTTCGATAGTGAAAGATGGTTTTGCTATCACTTATAGATGGACCCGCGCCGTATTAGCTAGTTGGTAAGGTAACGGCTTACCAAGGCGACGATACGTAGCCGACCTGAGAGGGTGATCGGCCACACTGGAACTGAGACACGGTCCAG "Bacteria" "Firmicutes" "Bacilli" "Bacillales" "Staphylococcaceae" "Staphylococcu…
GATGAACGCTGGCGGCGTGCCTAACACATGCAAGTCGAACGGGGCGCGCCGGCGGGGGCCCTCCGGGGCTGAAGCCGGCGCCGCCCAGTGGCGGACGGGTGAGTAACGCGTGGGCAACCTGCCCCGCACTGGGGGACAACAGCCGGAAACGGCTGCTAATACCGCATGGGCGCACAGCCCCGCATGGGGCGGTGCGGAAAGCCTTGGCGGTGCGGGATGGGCCCGCGTCTGATTAGCTTGTTGGCGGGGCAACGGCCCACCAAGGCGACGATCAGTAGCCGGCCTGAGAGGGTGGGCGGCCACATTGGGACTGAGACACGGCCCAA "Bacteria" "Firmicutes" "Clostridia" "Clostridiales" "Lachnospiraceae" "…
GACGAACGCTGGCGGCGTGCTTAACACATGCAAGTCGAACGGAAAGGCCCTGCTTGCAGGGTACTCGAGTGGCGAACGGGTGAGTAACACGTGGGTGATCTGCCCTGCACTTCGGGATAAGCCTGGGAAACTGGGTCTAATACCGGATAGGAGCCATTTTTAGTGTGATGGTTGGAAAGTTTTTTCGGTGTAGGATGAGCTCGCGGCCTATCAGCTTGTTGGTGGGGTAATGGCCTACCAAGGCGGCGACGGGTAGCCGGCCTGAGAGGGTGGACGGCCACATTGGGACTGAGATACGGCCCAG "Bacteria" "Actinobacteria" "Actinobacteria" "Corynebacteriales" "Corynebacteriaceae" "Coryneb…
GATGAACGCTGGCGGCGTGCTTAACACATGCAAGTCGAACGAAGCGGCTGCAGGGATTCCCTTCGGGGAGGAACAGTAGCTGTCTGAGTGGCGGACGGGTGAGTAACGCGTGGGCAACCTGCCCCATACCGGGGGATAACAGCCGGAAACGGCTGCTAATACCGCATACGCCCAGGAGGCTGCATAGCTTCCTGGGGAAAACTCCGGTGGTATGGGATGGGCCCGCGTCTGATTAGCTCGTTGGCGGGGTAACGGCCCACCAAGGCGACGATCAGTAGCCGGCCTGAGAGGGCGGCCGGCCACATTGGGACTGAGACACGGCCCAG "Bacteria" "Firmicutes" "Clostridia" "Clostridiales" "Lachnospiraceae" "…
GATGAACGCTGGCGGCGTGCTTAACACATGCAAGTCGAACGGGGTGCCTTTGACAGAGGATTCGTCCAATGGATAAGGTTACCTAGTGGCGGACGGGTGAGTAACGCGTGAGTAACCTGCCCTGGAGTGGGGAATAACAGCTGGAAACAGCTGCTAATACCGCATAATGCAGTTGGGTCGCATGGCTCTGACTGCCAAAGATTTATCGCTCTGGGATGGACTCGCGTCTGATTAGCTAGTTGGTGGGGCAACGGCCCACCAAGGCGACGATCAGTAGCCGGACTGAGAGGTTGGCCGGCCACATTGGGACTGAGACACGGCCCAG "Bacteria" "Firmicutes" "Clostridia" "Clostridiales" "Ruminococcaceae" "R…
GATGAACGCTGGCGGCGTGCTTAACACATGCAAGTCGAGCGAAAATAATTAGGAGCTTGCTTTTAATTATTTTAGCGGCGGACGGGTGAGTAACGTGTGGGCAACCTGCCTTTTACTGGGGAATAATCACTGGAAACGGTGACTAATACCGCATAATATTCTTGGAAGGCATCTTCTGAGAAGGAAAGGAAATATTCGGTAAAAGATGGGCCCGCATCTGATTAGCTAGTTGGTGAGATAACAGCCCACCAAGGCGACGATCAGTAGCCGACCTGAGAGGGTGACCGGCCACATTGGGACTGAGACACGGCCCAA "Bacteria" "Firmicutes" "Clostridia" "Clostridiales" "Lachnospiraceae" "ASF356" NA
GATGAACGCTGGCGGCGTGCCTAACACATGCAAGTCGAACGGGCCGCGCCTGAAACCTAGTGAAGGCGCGGCCAGTGGCGGACGGGTGAGTAACGCGTGGGCAACCTGCCGCGCATAGGGGGACAACGGCCGGAAACGGCCGCTAATACCGCATAATCCCGCGGGGCCGCATGGCCCCGCGGGGAAAGCCCGGGGCGACCCGGACGGTGCGCGATGGGCCCGCGTCCGATTAGCTTGTTGGCGGGGCAGCGGCCCACCAAGGCGACGATCGGTAGCCGGCCTGAGAGGGCGGACGGCCACACTGGGACTGAGACACGGCCCAG "Bacteria" "Firmicutes" NA NA NA NA NA
GATGAACGCTGGCGGCGTGCTTAACACATGCAAGTCGAACGAAGCATCTAATAGCGAAGCCTTCGGGCAGAGCAATTAGATGACTGAGTGGCGGACGGGTGAGTAACGCGTGGGTAACCTGCCTCATACAGGGGGATAACAGTCAGAAATGGCTGCTAATACCGCATAAGCGCACAGAACCGCATGGTTCAGTGTGAAAAGCTCCGGCAGTATGAGATGGACCCGCGTCTGATTAGCTAGTTGGAGGGGTAAAGGCCCACCAAGGCAACGATCAGTAGCCGGCTTGAGAGAGTGACCGGCCACATTGGGACTGAGACACGGCCCAG "Bacteria" "Firmicutes" "Clostridia" "Clostridiales" "Lachnospiraceae" N…
GATGAACGCTGGCGGCGTGCCTAACACATGCAAGTCGAACGGACTTATAACGAAACCTAGTGAATTATGAGTTAGTGGCGGACGGGTGAGTAACGCGTGGAAAACCTGCCGTATACTGGGGGATAACACTTAGAAATAGGTGCTAATACCGCATAAGCGCACAGCTTCGCATGAAGCAGTGCGAAAAACTCCGGTGGTATACGATGGTTCCGCGTCTGATTAGCTAGTTGGTGAGGTAAAAGCCCACCAAGGCAACGATCAGTAGCCGGCCTGAGAGGGTGAACGGCCACATTGGGACTGAGACACGGCCCAG "Bacteria" "Firmicutes" "Clostridia" "Clostridiales" "Lachnospiraceae" "Lachnospirace…
GATGAATGCTGGCGGCGTGGATGAGGCATGCAAGTCGAATGAATTTAGATTCATGGCAGACGAGGTAGGAACACGTAGGTACGTACCCAAGAGTCAGGGATAATCCGTCGAAAGGCGGCACAATACTTGATGGTCCCTTCGGGGTAAAGATTTATCGCTCTTGGAACGGCCTGCGGGCTATCAGCTTGTTGGTAAGGTAACGGCTTACCAAGGCTACGACGGCTAGGGGAGGTGAGAGCCTGACCCCCACCGATGGAACTGCGACACGGTCCAT "Bacteria" "Patescibacteria" "Parcubacteria" "Candidatus_Kaiserbacteria" NA NA NA
GATAAACGCTGGCGGCGCACATAAGACATGCAAGTCGAACGAACTTAATCGAAAGTTTACTTTTGAAGCGGTTAGTGGCGGACTGGTGAGTAACGCGTAAGTAATCTGCCTATCAGAGGGGAATAACAGTGAGAAATCATTGCTAATACCGCATATACTAATTTTATCACATGATGAAATTAGGAAAGGAGCAATCCGCTGATAGATGGGCTTGCGTCTGATTAGTTAGTTGGTAGGGTAAAGGCCTACCAAGACGATGATCAGTAGCCGGACTGAGAGGTTGAACGGCCACATTGGGACTGAGATACGGCCCAG "Bacteria" "Firmicutes" "Clostridia" "Clostridiales" "Ruminococcaceae" "Ruminococca…
GATGAACGCTGGCGGCGTGCCTAACACATGCAAGTCGAACGGGGCGTGCCCATGGAAACTTTTCGGAGCGGACATGGGCGCTGCCTAGTGGCGGACGGGTGAGTAACGCGTGGGCAACCTACCCTGCACTGGGGGACAACAGCCGGAAACGGCTGCTAATACCGCATATCCCCGCTGCCCCACATGGGGCGGCAGGGAAAGCTCCGGCGGTGCAGGATGGGCCCGCGTCTGATTAGCTTGTTGGCGGGGCAACGGCCCACCAAGGCGACGATCAGTAGCCGGCCTGAGAGGGTGGACGGCCACATTGGGACTGAGACACGGCCCAG "Bacteria" "Firmicutes" "Clostridia" "Clostridiales" "Lachnospiraceae" "…
GATGAACGCTGGCGGCGTGCTTAACACATGCAAGTCGAACGGGGATGCCCTGCCGATGAGGCTTCGGCCAATTCTTGGGCATCCTAGTGGCGGACGGGTGAGTAACGCGTGGGCAACCTGCCCTGTACAGGGGGATAACACTTAGAAATAGGTGCTAAAACCGCATAAGCGCACAGCTTTGCATGAAGCAGTGTGAAAAACTCCGGTGGTACAGGATGGACCCGCGTCTGATTAGCTGGTTGGAGGGGTAACGGCCCACCAAGGCGACGATCAGTAGCCGGCCTGAGAGGGTGAACGGCCACATTGGGACTGAGACACGGCCCAA "Bacteria" "Firmicutes" "Clostridia" "Clostridiales" "Lachnospiraceae" "L…
GATGAACGCTGGCGGCGTGCTTAACACATGCAAGTCGAACGGAGTATTGACTTTGAATTCTAACGGATGAAGAGTTGATACTTAGTGGCGGACGGGTGAGTAACGCGTGGATAACCTGCCCCATACCGGGGGATAACAGCCGGAAACGGCTGCTAATACCGCATAAGCGCACGGGAATGCATGTTTCAGTGTGAAAAACTCCGGTGGTATGGGATGGATCCGCGTCTGATTAGCTGGTTGGCGGGGTAGAGGCCCACCAAGGCGACGATCAGTAGCCGACCTGAGAGGGTGGCCGGCCACATTGGGACTGAGACACGGCCCAG "Bacteria" "Firmicutes" "Clostridia" "Clostridiales" "Lachnospiraceae" NA NA
GATGAACGCTGGCGGCGTGCCTAATACATGCAAGTCGAGCGAATGGATTGAGAGCTTGCTCTCAAGAAGTTAGCGGCGGACGGGTGAGTAACACGTGGGTAACCTGCCCATAAGACTGGGATAACTCCGGGAAACCGGGGCTAATACCGGATAATATTTTGAACTGCATGGTTCGAAATTGAAAGGCGGCTTCGGCTGTCACTTATGGATGGACCCGCGTCGCATTAGCTAGTTGGTGAGGTAACGGCTCACCAAGGCAACGATGCGTAGCCGACCTGAGAGGGTGATCGGCCACACTGGGACTGAGACACGGCCCAG "Bacteria" "Firmicutes" "Bacilli" "Bacillales" "Bacillaceae" "Bacillus" NA
GATGAATGCTGGCGGCGTGCCTAATACATGCAAGTCGAGCGGTAGCAGGGCTTCACCGTTCTCTTGTCGCACTTGGCCTATGTGCAAGTGGTCTGATACGAGGGAACAGTGAAGCTGCTGACGAGCGGCGGACGGCTGAGTAACGCGTGGGAACATACCCTAAAGTGAGGGATAACTACTCGAAAGAGTGGCTAATACCGCATATGATCTTCGGATTAAAGCTTTCGAGCGCTTTAGGAATGGCCTGCGTACGATTAGATAGTTGGTGAGGTAAAGGCTCACCAAGTCGACGATCGTTAGATGGTTTGAGAGGATGATCATCCAGACTGGGACTGAGACACGGCCCAG "Bacteria" "Patescibacteria" "Saccharimonadia" "Sa…
GATGAACGCTGGCGGCGTGCTTAACACATGCAAGTCGAACGAGAACCGATGGAACGAGGATTCGTCTGAGGGAAGTCGGGGAAAGTGGCGGACGGGTGAGTAACGCGTGAGCAATCTACCTTGGAGTGGGGAATAACGGCTGGAAACAGCCGCTAATACCGCATGATGCGTCTGGGCCGCATGGCTCTGGGCGCCAAAGATTCATCGCTCTGAGATGAGCTCGCGTCTGATTAGCTAGTTGGCGGGGCAACGGCCCACCAAGGCGACGATCAGTAGCCGGACTGAGAGGTTGGCCGGCCACATTGGGACTGAGACACGGCCCAG "Bacteria" "Firmicutes" "Clostridia" "Clostridiales" "Ruminococcaceae" NA …
GATGAACGCTGGCGGCGTGCCTAACACATGCAAGTCGAACGGGGTCTTAGTACGGAAGTTTTCGGATGGAAGGATTAAGACTTAGTGGCGGACGGGTGAGTAACGCGTGGGTAACCTGCCCTGTACAGGGGGATAACAGTTGGAAACGGCTGCTAAAACCGCATAACATGGAGATACCGCATGATATTTCCATCAAATATTTATAGGTACAGGATGGGCCCGCGTCTGATTAGCCAGTTGGCAGGGTAATGGCCTACCAAAGCGTCGATCAGTAGCCGGCTTGAGAGAGTGACCGGCCACATTGGGACTGAGACACGGCCCAA "Bacteria" "Firmicutes" "Clostridia" "Clostridiales" "Lachnospiraceae" "Lac…
GATGAATGCTGGCGGCGTGCCTAATACATGCAAGTCGAGCGGTAGCAGGGCTTCACCGTTCTCTTGTCGCACTTGGCCTATGTGCAAGTGGTCTGATACGAGGGAACAGTGAAGCTGCTGACGAGCGGCGGACGGCTGAGTAACGCGTGGGAACATACCCCAAACTGAGGGATAACTACTCGAAAGAGTGGCTAATACCGCATATGATCTTCGGATTAAAGCTTTCGGGCGGTTTGGGAATGGCCTGCGTACGATTAGATAGTTGGTGAGGTAATGGCTCACCAAGTCGACGATCGTTAGATGGTTTGAGAGGATGATCATCCAGACTGGGACTGAGACACGGCCCAG "Bacteria" "Patescibacteria" "Saccharimonadia" "Sa…
GATGAACGCTGGCGGCATGCCTAAGACATGCAAGTCGAACGAGGTGGCCCATTGAAGTTGGAGTGCTTGCACAAAAATGGATTTGGATTTTCCACCTAGTGGCAAACGGGTGAGTAACACGTGGGTTACCTGCCCTTAAGTTGGGGATAACAGTTGGAAACGATTGCTAATACCGAATGTGCTCTTCGGAGTAAAGAAGCCCTTAAAGCTTCGCTTAAGGATGGGCCTGCGGTGCATTAGCTTGTTGGTGGGGTAATGGCCTACCAAGGCAACGATGCATAGCCGAACTGAGAGGTTGATCGGCCACACTGGGACTGAGACACGGCCCAG "Bacteria" "Tenericutes" "Mollicutes" "Mollicutes_RF39" NA NA NA
GATGAACGCTAGCGACAGGCTTAACACATGCAAGTCGAGGGGCAGCATGAACTTAGCTTGCTAAGTTTGATGGCGACCGGCGCACGGGTGAGTAACGCGTATGCAACTTACCTATCAGAGGAGAATAGCTCATCGAAAGATGAATTAATGCTCCATAAAACAGGGGTCCCGCATGGGAATATTTGTTAAAGATTCATCGCTGATAGATAGGCATGCGTTCCATTAGGCAGTTGGCGGGGTAACGGCCCACCAAACCGACGATGGATAGGGGTTCTGAGAGGAAGGTCCCCCACATTGGTACTGAGACACGGACCAA "Bacteria" "Bacteroidetes" "Bacteroidia" "Bacteroidales" "Tannerellaceae" "Parabac…
GATGAACGCTGGCGGCGTGCCTAACACATGCAGGTCGAACGGGGTCCGTGCGGCGAATTTTTCGGAAGGAGGCGTGCGGACCGAGTGGCGGACGGGTGAGTAACGCGTGGGCAACCTGCCCCGTACAGGGGGATAACAGCCGGAAACGGCTGCTAATACCGCATGAACGCGGGACGGCGCATGCCGTGCCGCGGAAAGCCAGGGCGGTACGGGAGGGGCCCGCGTCCGATCAGCTAGTTGGCGGGGTAACGGCCCACCAAGGCAGCGACCGGTAGCCGGCCTGAGAGGGCGGACGGCCACACTGGGACTGAGACACGGCCCAG "Bacteria" "Firmicutes" "Clostridia" NA NA NA NA
GATGAACGCTGGCGGCGTGCTTAACACATGCAAGTCGAGCGAAAATAATTGAGAGCTTGCTTTTGATTATTTTAGCGGCGGACGGGTGAGTAACGTGTGGGTAACCTGCCTTTTACTGGGGAATAATCACTGGAAACGGTGACTAATACCGCATACGGTTCTTGGAAGGCATCTTCTGAGAAAGAAAGGATTTATTCGGTAAAAGATGGACCCGCATCTGATTAGCTAGTTGGTGAGATAACAGCCCACCAAGGCGACGATCAGTAGCCGACCTGAGAGGGTGACCGGCCACATTGGGACTGAGACACGGCCCAA "Bacteria" "Firmicutes" "Clostridia" "Clostridiales" "Lachnospiraceae" "ASF356" NA
GACGAACGCTGGCGGCGTGCTTAACACATGCAAGTCGAACGAAAAGACGGAAAGAGCTTGCTCTTTCCGGAATTGAGTGGCAAACGGGTGAGTAACACGTAAACAACCTGCCTTCAGGATGGGGACAACAGACGGAAACGACTGCTAATACCGAATAAGTTCCAAGGGCCGCATGGCCCATGGAAGAAAAGGTGGCCTCTACCTGTAAGCTATCGCCTGAAGAGGGGTTTGCGTCTGATTAGCTGGTTGGAGGGGTAACGGCCCACCAAGGCGACGATCAGTAGCCGGTCTGAGAGGATGAACGGCCACACTGGAACTGAGACACGGTCCAG "Bacteria" "Firmicutes" "Negativicutes" "Selenomonadales" "Veillon…
GATAAACGCTGGCGGCGCACATAAGACATGCAAGTCGAACGAACTTAACCGAAGTATTTATATTTTGGAGCGGTTAGTGGCGGACTGGTGAGTAACACGTAAGCAACCTGCCTATTAGAGGGGAATAACAGTGAGAAATCATTGCTAATACCGCATATGCCATAGATACCACATGGTGTCAGTGGGAAAGGAGTAATCCGCTAATAGATGGGCTTGCGTCTGATTAGATAGTTGGTGGGGTAACGGCCTACCAAGTCGACGATCAGTAGCCGGACTGAGAGGTTGAACGGCCACATTGGGACTGAGATACGGCCCAG "Bacteria" "Firmicutes" "Clostridia" "Clostridiales" "Ruminococcaceae" "Ruminococ…
GATAAACGCTGGCGGCGCACATAAGACATGCAAGTCGAACGAACTTAATACCTTGCTTGCAAGGTAAGCGGTTAGTGGCGGACTGGTGAGTAACACGTAAGAAATCTGCCTATCAGAGGGGAATAACAGTGAGAAATCACTGCTAATACCGCATATGCCATAGGAATCGCATGATTCTAGTGGGAAAGGAGCAATCCGCTGATAGATGAGCTTGCGTCTGATTAGCTAGTTGGTGGGGTAAAGGCCTACCAAGGCGACGATCAGTAGCCGGACTGAGAGGTTGAACGGCCACATTGGGACTGAGATACGGCCCAG "Bacteria" "Firmicutes" "Clostridia" "Clostridiales" "Ruminococcaceae" "Ruminococca…
GATGAACGCTGGCGGCGTGCCTAACACATGCAAGTCGAACGGGAACGGCCCACGGGTGAGATTTCGGTCAAGCCCCGGACTGTTTTAGTGGCGGACGGGTGAGTAACGCGTGGGCAACCTGCCCCGTACCGGGGGATAACACCTGGAAACAGGTGCTAATACCGCATAATAAGAGGTCCTGCATGGGACCTCCTTGAAAACTCCGGTGGTACGGGATGGACCCGCGTCTGATTAGCTGGTTGGCGGGGTAACGGCCCACCAAGGCGACGATCGGTAGCCGGCCTGAGAGGGTGGACGGCCACATTGGGACTGAGACACGGCCCAG "Bacteria" "Firmicutes" "Clostridia" "Clostridiales" "Lachnospiraceae" NA…
GATAAACGCTGGCGGCGCACATAAGACATGCAAGTCGAACGAACTTAACCTTTAGTTTACTATTGGAGCGGTTAGTGGCGGACTGGTGAGTAACACGTAAGCAACCTGCCTATCAGAGGGGAACAACAGTTAGAAATGACTGCTAATACCGCATATGCCATGAGTATCACATGATACAAATGGGAAAGGAGCAATCCGCTGATAGATGGGCTTGCGTCTGATTAGATAGTTGGTGGGGTAGTGGCCTACCAAGTCGACGATCAGTAGCCGAACTGAGAGGTTGAACGGCCACATTGGGACTGAGATACGGCCCAG "Bacteria" "Firmicutes" "Clostridia" "Clostridiales" "Ruminococcaceae" "Ruminococca…
GATGAACGCTGGCGGCATGCCTAAGACATGCAAGTCGTACGAGGAGGCCCATTGAAGATGAAGTGCTTGCACTGATTTGGATTTGGATTCCCTCCTAGTGGCAAACGGGTGAGTAACACGTGGGTTACCTACCTTTATGTTGGGGATAACAGTTGGAAACGATTGCTAATACCGAATGTGCTCTACGGAGTAAAGAAGCCCTTAAAGCTTCGCATAAAGATGGGCCTGCGGTGCATTAGCTTGTTGGTGGGGTAATGGCCTACCAAGGCAACGATGCATAGCCGAACTGAGAGGTTGATCGGCCACACTGGGACTGAGACACGGCCCAG "Bacteria" "Tenericutes" "Mollicutes" "Mollicutes_RF39" NA NA NA
GATGAACGCTAGCTACAGGCTTAACACATGCAAGTCGAGGGGCAGCATGACCTAGCAATAGGTTGATGGCGACCGGCGCACGGGTGAGTAACACGTATCCAACCTGCCGATTATTCCGGGATAGCCTTTCGAAAGAAAGATTAATACCGGATAGCATAACGAGAAGGCATCTTCTTGTTATTAAAGAATTTCGATAATCGATGGGGATGCGTTCCATTAGTTTGTTGGCGGGGTAACGGCCCACCAAGACATCGATGGATAGGGGTTCTGAGAGGAAGGTCCCCCACATTGGAACTGAGACACGGTCCAA "Bacteria" "Bacteroidetes" "Bacteroidia" "Bacteroidales" "Bacteroidaceae" "Bacteroides" …
GATGAACGCCGGCGGTGTGCCTAATACATGCAAGTCGTACGCACTGGCCCAACTGATTGATGGTGCTTGCACCTGATTGACGATGGATCACCAGTGAGTGGCGGACGGGTGAGTAACACGTAGGTAACCTGCCCCGGAGCGGGGGATAACATTTGGAAACAGATGCTAATACCGCATAACAACGAAAGCCACATGGCTTTTGTTTGAAAGATGGCTTTGGCTATCACTCTGGGATGGACCTGCGGTGCATTAGCTAGTTGGTAAGGTAACGGCTTACCAAGGCGATGATGCATAGCCGAGTTGAGAGACTGATCGGCCACAATGGAACTGAGACACGGTCCAT "Bacteria" "Firmicutes" "Bacilli" "Lactobacillales" "La…
GATGAACGCTGGCGGCGTGCTTAACACATGCAAGTCGAACGGACTCATATTGAAACCTAGTGATGTATGAGTTAGTGGCGGACGGGTGAGTAACGCGTGGAGAACCTGCCGTATACTGGGGGATAACACTTAGAAATAGGTGCTAATACCGCATAAGCGCACAGCTTCGCATGAAGCAGTGTGAAAAACTCTGGTGGTATACGATGGATCCGCGTCTGATTAGCTGGTTGGCGGGGTAAAGGCCCACCAAGGCAACGATCAGTAGCCGGCCTGAGAGGGTGAACGGCCACATTGGGACTGAGACACGGCCCAA "Bacteria" "Firmicutes" "Clostridia" "Clostridiales" "Lachnospiraceae" "Lachnospirace…
GACGAACGCTGGCGGCGCGCCTAACACATGCAAGTCGAACGGGACTGTGCTGGAAGAAGTTTTCGGATGGATTTTGGCATAGTTTAGTGGCGGACGGGTGAGTAACACGTGAGCAACCTACCTTCTAGAGTGGAATAACGGCTGGAAACGGTCGCTAATACCGCATAACGCATCGGGGGGACATCCCCTTGGTGCCAAAGATTTATCGCTGGGAGATGGGCTCGCGTCCGATTAGGTAGTTGGTGGGGTAACGGCCCACCAAGCCGACGATCGGTAGCCGGACTGAGAGGTTGAACGGCCACATTGGGACTGAGACACGGCCCAG "Bacteria" "Firmicutes" "Clostridia" "Clostridiales" "Ruminococcaceae" NA…
GATGAACGCTGGCGGCGTGCCTAACACATGCAAGTCGAACGGAGACGGACCTGGAAGTAACAGTTTACTGTAACGGAAAGACCTGTCTTAGTGGCGGACGGGTGAGTAACGCGTGGGCAACCTGCCCTGTACCGGGGGATAACACTTAGAAATAGGTGCTAATACCGCATAATAAGGAAGACCGCATGGTGATCCTTTGAAAACTCCGGTGGTACAGGATGGGCCCGCGTCTGATTAGCCAGTTGGCGGGGTAACGGCCCACCAAAGCGACGATCAGCAGCCGGCCTGAGAGGGTGGACGGCCACACTGGGACTGAGACACGGCCCAG "Bacteria" "Firmicutes" "Clostridia" "Clostridiales" "Lachnospiraceae"…
GATGAACGCTGGCGGCGTGCTTAACACATGCAAGTCGAGCGGAGGTATATAATCGGAGAGCTTCGGCAGGAAGAGTATATAGCTTAGCGGCGGACGGGTGAGTAACGTGTGGGCAACCTGCCGTATACAGGGGAATAATCATTGGAAACGATGACTAATACCGCATGTCACCATTGGGAGGCATCTCGCGATGGGAAAAGGAGGAATCCGGTATACGATGGGCCCGCATCTGATTAGCTAGTTGGTGAGATAATAGCTCACCAAGGCGACGATCAGTAGCCGACCTGAGAGGGTGATCGGCCACATTGGGACTGAGACACGGCCCAA "Bacteria" "Firmicutes" "Clostridia" "Clostridiales" "Lachnospiraceae" …
GATAAACGCTGGCGGCGCACATAAGACATGCAAGTCGAACGGAAGTCGTTGTAATGATTTTGACATGGACAGAGAACTTGTTCGAAGAAAGTGAAGATTGACTTACAACAATGGCTTTAGTGGCGGACTGGTGAGTAACGCGTGAGCAACCTGCCTGTTAGAGGGGAATAACAGTGAGAAATCATTGCTAATACCGCATATGCCATAGTTACCACATGGTAACAGTGGGAAAGGAGCAATCCGCTAACAGATGGGCTCGCGTCTGATTAGATAGTTGGTGGGGTAACGGCCTACCAAGTCGACGATCAGTAGCCGGACTGAGAGGTTGAACGGCCACATTGGGACTGAGATACGGCCCAG "Bacteria" "Firmicutes" "Clostridia" "…
ATTGAACGCTGGCGGCAGGCTTAACACATGCAAGTCGAACGATGAAACTCTAGCTTGCTAGAGATGATTAGTGGCGGACGGGTGAGTAACATTTAGGAATCTGCCTAGTAGTGGGGGATAGCTCGGGGAAACTCGAATTAATACCGCATACGACCTACGGGTGAAAGGGGGCGCAAGCTCTTGCTATTAGATGAGCCTAAATCAGATTAGCTAGTTGGTGGGGTAAAGGCCCACCAAGGCGACGATCTGTAACTGGTCTGAGAGGATGATCAGGCACACCGGAACTGAGACACGGTCCGG "Bacteria" "Proteobacteria" "Gammaproteobacteria" "Pseudomonadales" "Moraxellaceae" "Enhydrobacter…
GATGAACGCTAGCGACAGGCTTAACACATGCAAGTCGAGGGGCAGCGGGGGCGAAGCTTGCTTCGCCTGCCGGCGACCGGCGCACGGGTGAGTAACACGTATGCAACCTACCCCCTGCAGGGGAATAACCCGGAGAAATCCGGACTAATACCACACGGCACTTTCGGGAGGCATCTCCTGAGGGTTAAAGGAGCGATCCGGCCGGGGATGGGCATGCGGCGCATTAGCTAGTCGGCGGGGTAACGGCCCACCGAGGCGACGATGCGTAGGGGTTCTGAGAGGAAGGTCCCCCACACTGGTACTGAGACACGGACCAG "Bacteria" "Bacteroidetes" "Bacteroidia" "Bacteroidales" "Muribaculaceae" NA NA
GATGAACGCTGGCGGCGTGCCTAACACATGCAAGTCGAACGGATCCATATTGAAACCTAGTGATGTATGGATTAGTGGCGGACGGGTGAGTAACGCGTGGATAACCTGCCGTATACAGGGGGATAACACTTAGAAATAGGTGCTAATACCGCATAAGCGCACGATTCCGCATGGAACAGTGTGAAAAACTCCGGTGGTATACGATGGATCCGCGTCTGATTAGCCAGTTGGCGGGGTAACGGCCCACCAAAGCGACGATCAGTAGCCGGCCTGAGAGGGTGAACGGCCACATTGGGACTGAGACACGGCCCAA "Bacteria" "Firmicutes" "Clostridia" "Clostridiales" "Lachnospiraceae" "Lachnospirace…
GATGAACGCTAGCTACAGGCTTAACACATGCAAGTCGAGGGGAAACGATAGAGAAAGCTTGCTTTTTCTAGGCGTCGACCGGCGCACGGGTGAGTAACGCGTATCCAACCTGCCCATCACTTGGGGATAACCTTGCGAAAGTAAGACTAATACCCAATGATATCTCTAGAAGACATCTGAAGGAGATTAAAGATTTATCGGTGATGGATGGGGGTGCGTCTGATTAGCTTGTTGGCGGGGTAACGGCCCACCAAGGCGACGATCAGTAGGGGTTCTGAGAGGAAGGTCCCCCACATTGGAACTGAGACACGGTCCAA "Bacteria" "Bacteroidetes" "Bacteroidia" "Bacteroidales" "Prevotellaceae" "Prevot…
GATGAACGCTAGCGGCAGGCCTAACACATGCAAGTCGAGCGGGATTAATTGATAGCTTGCTATTGATTATGAGAGCGGCGCACGGGTGCGTAACGCGTATGCAACCTGCCCTTTGCTGGGGGATAGCCCGGAGAAATTCGGATTAATACCCCATAGTATCACTGATTCGCATGTTTTAGTGATTAAAGGTTACGGCAAAGGATGGGCATGCGTCCTATTAGCTAGATGGTGAGGTAACGGCTCACCATGGCGACGATAGGTAGGGGGCCTGAGAGGGTGGTCCCCCACACTGGTACTGAGACACGGACCAG "Bacteria" "Bacteroidetes" "Bacteroidia" "Flavobacteriales" "Crocinitomicaceae" NA NA
GATGAACGCTGGCGGCGTGCTTAACACATGCAAGTCGAACGGAGCACCCCTGAAGGAGTTTTCGGACAACTGATGGGAATGCTTAGTGGCGGACGGGTGAGTAACGCGTGAGCAACCTGCCTTGGAGTGGGGAATAACAGCTGGAAACAGCTGCTAATACCGCATAATATGTCTGAACCGCATGGCTCTGGACATCAAAGATTTATCGCTCTGAGATGGACTCGCGTCTGATTAGCTAGTTGGCGGGGCAACGGCCCACCAAGGCGACGATCAGTAGCCGGACTGAGAGGTTGGCCGGCCACATTGGGACTGAGACACGGCCCAG "Bacteria" "Firmicutes" "Clostridia" "Clostridiales" "Ruminococcaceae" "R…
GATGAACGCTGGCGGCGTGCCTAACACATGCAAGTCGAACGGTTAAGCCGGCTTCGGCCGGGAATACAGTGGCGAACGGGTGAGTAACACGTGACCAACCTGCCCCCCGCTCCGGGACAACCGCTGGAAACGGCGGCTAATACCGGGTACTCCGCGGGCCCCGCATGGGGCCGGCGGGAAAGCCCAGGCGGCGGGGGATGGGGTCGCGGCCCATTAGGTAGTAGGCGGGGTAGAGGCCCACCTAGCCGACGATGGGTAGCCGGACTGAGAGGTCGACCGGCCACATTGGGACTGAGATACGGCCCAG "Bacteria" "Actinobacteria" "Coriobacteriia" "Coriobacteriales" "Eggerthellaceae" "Enterorh…
GACGAACGCTGGCGGCGTGCCTAATACATGCAAGTCGAGCGGGTCTCTTCGGAGGCCAGCGGCGGACGGGTGAGGAACACGTGGGTAATCTGCCTTTCAGGCCGGAATAACGCCCGGAAACGGGCGCTAATGCCGGATACGCCCGCAAGGAGGCATCTTCTTGCGGGGGAAGGCCCAATTGGGCCGCTGAGAGAGGAGCCCGCGGCGCATTAGCTGGTTGGCGGGGTAACGGCCCACCAAGGCGACGATGCGTAGCCGACCTGAGAGGGTGACCGGCCACACTGGGACTGAGACACGGCCCAG "Bacteria" "Firmicutes" "Bacilli" "Bacillales" "Alicyclobacillaceae" "Alicyclobacillus" NA
GATGAACGCTGGCGGCGTGCTTAACACATGCAAGTCGAACGAAGCAAGAAGCGAAGCGCAAGCAGAGGTTCTTGACTGAGTGGCGGACGGGTGAGTAACGCGTGGATAACCTGCCTTTCACAGGGGGATAACAGCTGGAAACGGCTGCTAATACCGCATGAGCCTCTTTTGTCGCATGAGGAGAGAGGGAAAGAGAAATCGGTGAGAGATGGATCCGCGTCCGATTAGCTAGTTGGAGGGGTAACAGCCCACCAAGGCGACGATCGGTAGCCGACCTGAGAGGGTGGACGGCCACATTGGGACTGAGACACGGCCCAA "Bacteria" "Firmicutes" "Clostridia" "Clostridiales" "Lachnospiraceae" NA NA
GATGAACGCTGGCGGCGTGCTTAACACATGCAAGTCGAACGGAACACCCTTGAAGGAGTTTTCGGACAACTGAGAGGACTGTTTAGTGGCGGACGGGTGAGTAACGCGTGAGTAACCTGCCTTGGAGTGGGGAATAACACAGAGAAATTTGTGCTAATACCGCATAATGCAGCTGAGTCGCATGGCTCTGGCTGCCAAAGATTTATCGCTCTGAGATGGACTCGCGTCTGATTAGCTAGTTGGCGGGGTAACGGCCCACCAAGGCGACGATCAGTAGCCGGACTGAGAGGTTGGCCGGCCACATTGGGACTGAGACACGGCCCAG "Bacteria" "Firmicutes" "Clostridia" "Clostridiales" "Ruminococcaceae" "R…
GACGAACGCTGGCGGCGTGCTTAACACATGCAAGTCGAACGGAGTACCCTCGAAAGAGATTTCGGTCAATGGAGAGGACTACTTAGTGGCGGACGGGTGAGTAACGCGTGAGGAACCTGCCTTTCAGTGGGGGACAACAGTTGGAAACGACTGCTAATACCGCATAACGTACTGGTATCGCATGGTACTGGTACCAAAGATTTATCGCTGAGAGATGGCCTCGCGTCTGATTAGCTAGTTGGTAGGGTAACGGCCTACCAAGGCGACGATCAGTAGCCGGACTGAGAGGTTGGCCGGCCACATTGGGACTGAGATACGGCCCAG "Bacteria" "Firmicutes" "Clostridia" "Clostridiales" "Ruminococcaceae" "Ru…
GATAAACGCTGGCGGCGCACATAAGACATGCAAGTCGAACGAACTTAAGCCTTAGTTTACTATGGTAGCGGTTAGTGGCGGACTGGTGAGTAACACGTAAGCAACCTGCCTATCAGAGGGGAACAACAGTTAGAAATGACTGCTAATACCGCATATACCTAAGTATCGCATGATACAATAGGGAAAGGAGCAATCCGCTGATAGATGGGCTTGCGTCTGATTAGCTAGTTGGTGGGGTAAAGGCCTACCAAGGCGACGATCAGTAGCCGGACTGAGAGGTTGAACGGCCACATTGGGACTGAGATACGGCCCAG "Bacteria" "Firmicutes" "Clostridia" "Clostridiales" "Ruminococcaceae" "Ruminococcac…
GACGAACGCTGGCGGCGCGCCTAACACATGCAAGTCGAACGGGACTATACTGGAAGAAGTTTTCGGATGGATTTCGGTATAGTTTAGTGGCGGACGGGTGAGTAACACGTGAGCAACCTGCCTTCGAGAGGGGAATAACGGCTGGAAACGGTCGCTAATACCGCATAACATACCGGGAGGACATCCTGCTGGTATCAAAGATTTTATCGCTCGAAGATGGGCTCGCGTCCGATTAGGTAGTTGGTGAGGTAACGGCTCACCAAGCCGACGATCGGTAGCCGGACTGAGAGGTTGAACGGCCACATTGGGACTGAGACACGGCCCAG "Bacteria" "Firmicutes" "Clostridia" "Clostridiales" "Ruminococcaceae" N…
GACGAACGCTGGCGGCGTGCCTAACACATGCAAGTCGAACGGAGATATCCGCTGATGAAGTACTTCGGTAATGATTCTTGGATATCTTAGTGGCGGACGGGTGAGTAACGCGTGAGCAACCTGCCTTTCAGAGGGGGATAACGTTTGGAAACGAACGCTAATACCGCATGATATTATTGAGCTGCATGGCTTGATAATCAAAGGAGCAATCCGCTGAAAGATGGGCTCGCGTCCGATTAGGTAGTTGGCGGGGCAACGGCCCACCAAGCCGACGATCGGTAGCCGGACTGAGAGGTTGAACGGCCACATTGGGACTGAGACACGGCCCAG "Bacteria" "Firmicutes" "Clostridia" "Clostridiales" "Ruminococcacea…
GATGAACGCTGGCGGCGTGCCTAACACATGCAAGTCGAACGAAGCGCTTTATTTGATTTTCTTCGGAGATGAAGATTTTGCGACTGAGTGGCGGACGGGTGAGTAACGCGTGGGTAACCTGCCTCATACAGGGGGATAACAGTTGGAAACGACTGCTAATACCGCATAAGCGCACAGTACCGCATGGTACGGTGTGAAAAACTCCGGTGGTATGAGATGGACCCGCGTCTGATTAGCCAGTTGGCGGGGTAACGGCCCACCAAAGCGACGATCAGTAGCCGACCTGAGAGGGTGACCGGCCACATTGGGACTGAGACACGGCCCAA "Bacteria" "Firmicutes" "Clostridia" "Clostridiales" "Lachnospiraceae" "…
GATTAACGCTGGCGGCATGCCTAAGACATGCAAGTCGAACGGAGTGCCCCACTGAAGTCTGATTGAAGTTTGCGAGCTTGCTCAAAAATGGAAAGACGATGGACGTGGATTCTGCACTCAGTGGCGAACGGGTGAGTAACACGTGGGTTATCTACCTCTAAGTTGGGGACAACAGTTGGAAACGGCTGCTAATACCGAATGTGATAGAAATATTAAAGGAGCCTTTAAAGCTTCGCTTAGAGATGAGCCTGCGGCGTATTAGCTAGTTGGTGGGGTAATGGCCTACCAAGGCGACGATGCGTAGCCGGACTGAGAGGTTGATCGGCCACACTGGGACTGAAACACGGCCCAG "Bacteria" "Tenericutes" "Mollicutes" "Mollicu…
GATGAACGCTGGCGGCGTGCCTAACACATGCAAGTCGAACGGATTTATAACGAAACCTAGTGAATTATAAGTTAGTGGCGGACGGGTGAGTAACGCGTGGAAAACCTGCCGTATACTGGGGGATAACACTTAGAAATAGGTGCTAATACCGCATAAGCGCACAGCTTCGCATGAAGCAGTGTGAAAAACTCCGGTGGTATACGATGGTTCCGCGTCTGATTAGCTAGTTGGTGAGGTAAAAGCCCACCAAGGCGACGATCAGTAGCCGGCCTGAGAGGGTGAACGGCCACATTGGGACTGAGACACGGCCCAG "Bacteria" "Firmicutes" "Clostridia" "Clostridiales" "Lachnospiraceae" "Lachnospirace…
GATGAACGCTGGCGGCGTGCCTAACACATGCAAGTCGAGCGAGAAGCTGATGACTGATGCTTCGGTTGAAGGATTCAGTGGAAAGCGGCGGACGGGTGAGTAACGCGTAGGCAACCTGCCCTTTGCACAGGGATAGCCATTGGAAACGATGATTAAAACCTGATAACACCATTTTATCACATGGAAAGATGGTCAAAGATTTATCGGCAAAGGATGGGCCTGCGTCTGATTAGCTAGTTGGTGAGGTAACGGCTCACCAAGGCGACGATCAGTAGCCGACCTGAGAGGGTGATCGGCCACATTGGAACTGAGACACGGTCCAA "Bacteria" "Firmicutes" "Clostridia" "Clostridiales" "Family_XIII" NA NA
GATAAACGCTGGCGGCGCACATAAGACATGCAAGTCGAACGAACTTAATACCTTGCTTGCAAGGTAAGCGGTTAGTGGCGGACTGGTGAGTAACACGTAAGAAATCTGCCTATCAGAGGGGAATAACAGTGAGAAATCATTGCTAATACCGCATATGCCATAGTTATCGCATGATAATAGTGGGAAAGGAGCAATCCGCTGATAGATGAGCTTGCGTCTGATTAGCTAGTTGGTGGGGTAACGGCCTACCAAGGCGACGATCAGTAGCCGGACTGAGAGGTTGAACGGCCACATTGGGACTGAGATACGGCCCAG "Bacteria" "Firmicutes" "Clostridia" "Clostridiales" "Ruminococcaceae" "Ruminococca…
GATGAACGCTGGCGGCGTGCTTAACACATGCAAGTCGAACGGAGTATGAATTTGGATTTCTCACGATTGAAGAGTTCATACTTAGTGGCGGACGGGTGAGTAACGCGTGGATAACCTGCCCCATACCGGGGGATAACAGCCGGAAACGGCTGCTAATACCGCATAAGCGCACGGGACTGCATGGCCCTGTGTGAAAAACTCCGGTGGTATGGGATGGATCCGCGTCTGATTAGCTAGTTGGTGAGATAAAAGCCCACCAAGGCGACGATCAGTAGCCGACCTGAGAGGGTGGCCGGCCACATTGGGACTGAGACACGGCCCAG "Bacteria" "Firmicutes" "Clostridia" "Clostridiales" "Lachnospiraceae" NA NA
GATGAACGCTGGCGGCGTGCTTAACACATGCAAGTCGAACGAAGCGTGTAAAACAATCCTTCGGGTGCGTTTTATATGACTGAGTGGCGGACGGGTGAGTAACGCGTGGGGAACCTGCCGTATGCAGGGGGACAACAGTCAGAAATGACTGCTAATACCGCATAAGCACACAATGCTGCATGGCATGGTGTGAAAAGATTTATCGGCATACGATGGCCCCGCGTCTGATTAGCCAGTTGGCAGGGTAATGGCCTACCAAAGCAACGATCAGTAGCCGGCTTGAGAGAGTGACCGGCCACATTGGGACTGAGACACGGCCCAG "Bacteria" "Firmicutes" "Clostridia" "Clostridiales" "Lachnospiraceae" NA NA
GATAAACGCTGGCGGCGCACATAAGACATGCAAGTCGAACGAACTTAATCAAAATATTTATATTTTGAAGCGGTTAGTGGCGGACTGGTGAGTAACACGTAAGCAACCTACCTGTTAGAGGGGAACAACAGTTAGAAATGACTGCTAATACCGCATATGCCATAGTGAAGACATCTTCACAGTGGGAAAGGAGAAATCCACTAACAGATGGGCTTGCGTCTGATTAGCTAGTTGGTAGGGTAAAGGCCTACCAAGGCAACGATCAGTAGCCGGACTGAGAGGTTGAACGGCCACATTGGGACTGAGATACGGCCCAG "Bacteria" "Firmicutes" "Clostridia" "Clostridiales" "Ruminococcaceae" "Ruminococ…
GACGAACGCTGGCGGCGCGCCTAACACATGCAAGTCGAACGGAGATATTTTGCTTGAAGTTTTCGGATGGAAAGCAGCTTATCTTAGTGGCGAACGGGTGAGTAACACGTGAGCAACCTGCCTTTCAGAGGGGGACAACATTTGGAAACGAATGCTAATACCGCATAAGACCACAGTGTCGCATGGCACAGGGGTCAAAGGAGCAATCCGCTGAAAGATGGGCTCGCGTCCGATTAGGTAGTTGGTGAGGTAACGGCCCACCAAGCCGACGATCGGTAGCCGGACTGAGAGGTTGAACGGCCACATTGGGACTGAGACACGGCCCAG "Bacteria" "Firmicutes" "Clostridia" "Clostridiales" "Ruminococcaceae" …
GATGAACGCTGGCGGCGTGCTTAACACATGCAAGTCGAACGAAGCACTTGTAGCAGACTGGAGAGCTTGCTCAAAGGGAAGCAGCAAATGACTGAGTGGCGGACGGGTGAGTAACGCGTGGATAACCTGCCTCATACAGGGGGATAACAGTTGGAAACGGCTGTTAATACCGCATAAGCGCACGAGACCGCATGGTTTTGTGTGAAAAACTCCGGTGGTATGAGATGGGTCCGCGTCTGATTAGCTAGTTGGCAGGGTAACGGCCTACCAAGGCGACGATCAGTAGCCGGCCTGAGAGGGTGTACGGCCACATTGGGACTGAGACACGGCCCAA "Bacteria" "Firmicutes" "Clostridia" "Clostridiales" "Lachnospir…
GACGAACGCTGGCGGCGTGCTTAACACATGCAAGTCGAACGATGAAGCCTAGCTTGCTAGGTGGATTAGTGGCGAACGGGTGAGTAATACGTGAGTGACCTACCTTTGACTCTGGGATAAGCCTGGGAAACTGGGTCTAATACCGGATACGACCAATCTCCGCATGGGGTGTTGGTGGAAAGCGTTATGGAGTGGTTTTAGATGGGCTCACGGCCTATCAGCTTGTTGGTGAGGTAATGGCTTACCAAGGCGACGACGGGTAGCCGGCCTGAGAGGGTGACCGGCCACACTGGGACTGAGACACGGCCCAG "Bacteria" "Actinobacteria" "Actinobacteria" "Micrococcales" "Micrococcaceae" "Rothia" …
GACGAACGCTGGCGGCGCGCCTAACACATGCAAGTCGAACGGAGTTTAGAGAGCTTGCTTTTTAAACTTAGTGGCGGACGGGTGAGTAACACGTGAGTAACCTACCTTCCAAAGGGGGATAACGTCTGGAAACGGACGCTAATACCGCATAATACTATTTGAGGGCATCCTTGGATAGTCAAAGGAGGAATCCGATGGGAGATGGACTCGCGGCTGATTAGATAGTTGGCGGGGTAGAGGCCCACCAAGTCGACGATCAGTAGCCGGACTGAGAGGTTGAACGGCCACATTGGGACTGAGACACGGCCCAG "Bacteria" "Firmicutes" "Clostridia" "Clostridiales" "Ruminococcaceae" NA NA
GATGAACGCTGGCGGCGTGCTTAACACATGCAAGTCGAACGGGGATGCCATTTTTGAGGCGGTTAGTTTACTAAGCGCCAAGATGTTGGTATCTTAGTGGCGGACGGGTGAGTAACGCGTGGGTAACCTGCCTTATACAGGGGGATAACACTTAGAAATAGGTGCTAATACCGCATAAGCGCACGGGGCTGCATGGCCCAGTGTGAAAAACTCCGGTGGTATAAGATGGACCCGCGTCTGATTAGCTTGTTGGCGGGGTAACGGCCCACCAAGGCGACGATCAGTAGCCGGCCTGAGAGGGTGGACGGCCACATTGGGACTGAGACACGGCCCAA "Bacteria" "Firmicutes" "Clostridia" "Clostridiales" "Lachnospi…
GATGAACGCTGGCGGCGTGCTTAACACATGCAAGTCGAACGGGGTGCCTTTGACAGAGGATTCGTCCAATGGATGAGGTTACCTAGTGGCGGACGGGTGAGTAACGCGTGAGTAACCTGCCCTGGAGTGGGGAATAACAGCTGGAAACAGCTGCTAATACCGCATAATGCAGTTGGGTCGCATGGCTCTGACTGCCAAAGATTTATCGCTCTGGGATGGACTCGCGTCTGATTAGCTAGTTGGTGGGGCAACGGCCCACCAAGGCGACGATCAGTAGCCGGACTGAGAGGTTGGCCGGCCACATTGGGACTGAGACACGGCCCAG "Bacteria" "Firmicutes" "Clostridia" "Clostridiales" "Ruminococcaceae" "R…
GACGAACGCTGGCGGCGTGCCTAACACATGCAAGTCGAGCGGAGACAGTGAGTAGCTTGCTACGAGCTGTTTTAGCGGCGGACGGGTGAGTAACGCGTGAGCAACCTTTCCCAGACAGGGGAATAACACACCGAAAGGTGTACTAATACCGCATAAGACCACGGGATCACATGGTTCTGGGGTAAAAGATTTATCGGTTTGGGGTGGGCTCGCGTCCGATTAGGTAGTTGGTGAGGTAACGGCCCACCAAGCCGACGATCGGTAGCCGACCTGAGAGGGTGATCGGCCACATTGGGACTGAGACACGGCCCAA "Bacteria" "Firmicutes" "Clostridia" "Clostridiales" "Christensenellaceae" "Christens…
GATGAACGCTGGCGGCATGCCTAATACATGCAAGTCGAACGAGAGACCTTCGGGTCTCTAGTGGCGAACGGGTGAGTAACACGTAGGGAACCTGCCCGCGCACCGGGAATACGCTCTGGAAACGGAGAACAAATCCCGATGTACAGGAAGGAGGCATCTTCTTTCTGTGAAACATCCTTTAGGGGATGGGGCGCGGATGGACCTGCGGTGCATTAGTTGGTTGGCGGGGTAAAGGCCCACCAAGACGATGATGCATAGCCGGCCTGAGAGGGTGGACGGCCACATTGGGACTGAGACACGGCCCAG "Bacteria" "Firmicutes" "Erysipelotrichia" "Erysipelotrichales" "Erysipelotrichaceae" "Faeca…
GATGAACGCTGGCGGCGTGCTTAACACATGCAAGTCGAACGAAGCACCTGAGAACGATTCTTCGGATGAAGTCTCTTGTGACTGAGTGGCGGACGGGTGAGTAACGCGTGGGTAACCTGCCTCACACAGGGGGATAACAGTTGGAAACGACCGCTAATACCGCATAACCCGCTGGTGCCGCATGGCACTGACGGAAAAGATTTATCGGTGTGAGATGGACCCGCGTCTGATTAGCCAGTTGGCAGGGTAACGGCCTACCAAAGCGACGATCAGTAGCCGGCCTGAGAGGGTGAACGGCCACATTGGGACTGAGACACGGCCCAG "Bacteria" "Firmicutes" "Clostridia" "Clostridiales" "Lachnospiraceae" NA …
GATGAACGCTGGCGGCGTGCTTAACACATGCAAGTCGAACGGAGTACCCCTGAAGGAGTTTTCGGACAACTGATGGGACTACTTAGTGGCGGACGGGTGAGTAACGCGTGAGTAACCTGCCTTGGAGTGGGGAATAACAGCTGGAAACAGCTGCTAATACCGCATAATATGTCTGTGTCGCATGGCAGTGGATATCAAAGATTTATCGCTCTGAGATGGACTCGCGTCTGATTAGCTAGTTGGCGGGGTAACGGCCCACCAAGGCGACGATCAGTAGCCGGACTGAGAGGTTGGCCGGCCACATTGGGACTGAGACACGGCCCAG "Bacteria" "Firmicutes" "Clostridia" "Clostridiales" "Ruminococcaceae" "R…
GATGAACGCTGGCGGCGTGCCTAATACATGCAAGTCGAGCGAACAGATAAGGAGCTTGCTCCTTTGACGTTAGCGGCGGACGGGTGAGTAACACGTGGATAACCTACCTATAAGACTGGGATAACTTCGGGAAACCGGAGCTAATACCGGATAACATATTGAACCGCATGGTTCAATAGTGAAAGGCGGCTTTGCTGTCACTTATAGATGGATCCGCGCCGTATTAGCTAGTTGGTAAGGTAACGGCTTACCAAGGCAACGATACGTAGCCGACCTGAGAGGGTGATCGGCCACACTGGAACTGAGACACGGTCCAG "Bacteria" "Firmicutes" "Bacilli" "Bacillales" "Staphylococcaceae" "Staphylococcu…
GATAAACGCTGGCGGCGCACATAAGACATGCAAGTCGAACGAACAGAAGTCATTCTTATAGATTGATGGAAGTTAGTGGCGGACTGGTGAGTAAAGTATAAGTAACCTGCCTATCAGAGGGGAACAACAGTTGGAAACGACTGCTAATACCGCATATGCCATAGAGACCACATGGTTTCAGTGGGAAAGGAGAAATCCGCTGATAGATGGACTTATATCTGATTAGCTAGTTGGTGGGGTAAAGGCCTACCAAGGCGACGATCAGTAGCCGGACTGAGAGGTTAAACGGCCACATTGGGACTGAGATACGGCCCAG "Bacteria" "Firmicutes" "Clostridia" "Clostridiales" "Ruminococcaceae" "Ruminococc…
ATTGAACGCTGGCGGCAGGCCTAACACATGCAAGTCGAGCGGTAGCACAGAGAGCTTGCTCTCGGGTGACGAGCGGCGGACGGGTGAGTAATGTCTGGGAAACTGCCTGATGGAGGGGGATAACTACTGGAAACGGTAGCTAATACCGCATAACGTCGCAAGACCAAAGTGGGGGACCTTCGGGCCTCATGCCATCAGATGTGCCCAGATGGGATTAGCTAGTAGGTGGGGTAACGGCTCACCTAGGCGACGATCCCTAGCTGGTCTGAGAGGATGACCAGCCACACTGGAACTGAGACACGGTCCAG "Bacteria" "Proteobacteria" "Gammaproteobacteria" "Enterobacteriales" "Enterobacteriaceae"…
GATGAACGCTGGCGGCGTGCTTAACACATGCAAGTCGAATGTAGCAATACATGGCGGACGGGTGAGTAACGCGTGAGCAATCTGCCCATATCTGGGGGATAACAGTTGGAAACGACTGATAATACCGCATAACATCATAGGAAGGCATCTTCTCTTGATCAAAGATTTATCGGATATGGATGAGCTCGCGTCTGATTAGCTTGTTGGTGAGGTAACGGCTCACCAAGGCGACGATCAGTAGCCGACCTGAGAGGGTGATCGGCCACATTGGAACTGAGACACGGTCCAA "Bacteria" "Firmicutes" "Clostridia" "Clostridiales" "Clostridiales_vadinBB60_group" NA NA
ATTGAACGCTGGCGGCATGCTTTACACATGCAAGTCGAACGGCAGCACAGGGAGCTTGCTCCCGGGTGGCGAGTGGCGCACGGGTGAGTAATACATCGGAACGTGTCCTGTTGTGGGGGATAACTGCTCGAAAGGGTGGCTAATACCGCATGAGACCTGAGGGTGAAAGCGGGGGATCGCAAGACCTCGCGCAATTGGAGCGGCCGATGCCCGATTAGCTAGTTGGGGAGGTAAAGGCTCACCAAGGCGACGATCAATAGCTGGTCTGAGAGGACGACCAGCCACATTGGAACTGAGACACGGTCCAG "Bacteria" "Proteobacteria" "Gammaproteobacteria" "Betaproteobacteriales" "Burkholderiacea…
GATGAACGCTGGCGGCGTGCCTAATACATGCAAGTCGAGCGAATGGATTAAGAGCTTGCTCTTATGAAATTAGCGGCGGACGGGTGAGTAACACGTGGGTAACCTGCCCATAAGACTGGGATAACTCCGGGAAACCGGGGCTAATACCGGATAACATTTTGAACTGCATGGTTCGAAATTGAAAGGCGGCTTCGGCTGTCACTTATGGATGGACCCGCGTCGCATTAGCTAGTTGGTGAGGTAACGGCTCACCAAGGCAACGATGCGTAGCCGACCTGAGAGGGTGATCGGCCACACTGGGACTGAGACACGGCCCAG "Bacteria" "Firmicutes" "Bacilli" "Bacillales" "Bacillaceae" "Bacillus" NA
GATGAACGCTGGCGGCATGCCTAAGACATGCAAGTCGAACGAGACGACCTATAGAAGATGGAGTGCTTGCACAAAGTTGGAAATAGAAAATCGTCTAGTGGCGCAAGGGTGAGTAACACGTGGGTAATCTACCTCATAGACTGGGATAACTTCTGGAAACGGATGCTAATACCGGATGATATTTAAGAAGATACGTTTTCTTAAATTAAAAGGGGCCTTTAAAGCCTCACTGTGAGATGAGCCTGCGGCGTATTAGCTAGTTGGTGGGGTAAAGGCCTACCAAGGCAACGATGCGTAGCCGACCTGAGAGGGTGATCGGCCACACTGGGACTGAGACACGGCCCAG "Bacteria" "Tenericutes" "Mollicutes" "Mollicutes_RF…
GATGAACGCTGGCGGCGTGCTTAACACATGCAAGTCGAGCGAAGCATAAGAGAGGAAGTTTTAAATGGAATCTATTATGACTGAGCGGCGGACGGGTGAGTAACGCGTGGGTAACCTGCCCTATACAGGGGGATAACAGTTAGAAATGACTGCTAATACCGCATAAGCGCACGGAGCCGCATGGCGCTGTGTGAAAAACGATAGTGGTATAGGAGGGACCCGCGTCTGATTAGGTAGTTGGTGGGGTAACGGCCCACCAAGCCGACGATCAGTAGCCGACCTGAGAGGGTGACCGGCCACATTGGGACTGAGACACGGCCCAA "Bacteria" "Firmicutes" "Clostridia" "Clostridiales" "Lachnospiraceae" NA NA
GACGAACGCTGGCGGCGTGCTTAACACATGCAAGTCGAACGGGGTGCCTAAGAAGGAGATTTCGGTCAACGGATTAGGTTACTTAGTGGCGGACGGGTGAGTAACGCGTGAGGAACCTGCCTTTCAGAGGGGGACAACAGCTGGAAACGGCTGCTAATACCGCATAATATATAGTTGTCGCATGGCAGTTATATCAAAGATTTATCGCTGAAAGATGGCCTCGCGTCTGATTAGCTGGTTGGTGAGGTAACGGCCCACCAAGGCGACGATCAGTAGCCGGACTGAGAGGTTGGCCGGCCACATTGGGACTGAGATACGGCCCAG "Bacteria" "Firmicutes" "Clostridia" "Clostridiales" "Ruminococcaceae" "Ru…
GATAAACGCTGGCGGCGCACATAAGACATGCAAGTCGAACGAACAGAAGTCATTCTTATAGATTGATGGAAGTTAGTGGCGGACTGGTGAGTAAAGTATAAGTAACCTGCCTATCAGAGGGGAACAACAGTTGGAAACGACTGCTAATACCGCATATGCCATAAGAATCGCATGGTTCAAGTGGGAAAGGAGAAATCCGCTGATAGATGGACTTATATCTGATTAGCTAGTTGGTGGGGTAAAGGCCTACCAAGGCGACGATCAGTAGCCGGACTGAGAGGTTAAACGGCCACATTGGGACTGAGATACGGCCCAG "Bacteria" "Firmicutes" "Clostridia" "Clostridiales" "Ruminococcaceae" "Ruminococc…
GATGAACGCTGGCGGCGTGCTTAACACATGCAAGTCGAACGGAGATATCATTTTCGAAGCGATTAGTTTACTAAGAGCGGAGATGTTGCTATCTTAGTGGCGGACGGGTGAGTAACGCGTGGGTAACCTGCCTTACACTGGGGGATAACACTTAGAAATAGGTGCTAATACCGCATAACAGTAGGAGACGCATGTCTTTTACTTGAAAACTCCGGTGGTGTAAGATGGACCCGCGTCTGATTAGCTTGTTGGCGGGGTAACGGCCCACCAAGGCGACGATCAGTAGCCGGCCTGAGAGGGTGAACGGCCACATTGGGACTGAGACACGGCCCAA "Bacteria" "Firmicutes" "Clostridia" "Clostridiales" "Lachnospir…
GATGAACGCTGGCGGCGTGCCTAACACATGCAAGTCGAACGGACTCGGATTGAAACCTAGTGATTTCCGAGTTAGTGGCGGACGGGTGAGTAACGCGTGGATAACCTGCCGTATGCAGGGGGATAACAGTTGGAAACAGCTGCTAATACCGCATAAGCGCACAATACCGCATGGTACGGTGTGAAAAGATTTATCGGCATACGATGGATCCGCGTCCGATTAGCCAGTTGGCGGGGTAACGGCCCACCAAAGCGACGATCGGTAGCCGGCCTGAGAGGGCGGACGGCCACATTGGGACTGAGACACGGCCCAA "Bacteria" "Firmicutes" "Clostridia" "Clostridiales" "Lachnospiraceae" NA NA
GATGAACGCTGGCGGCGTGCCTAACACATGCAAGTCGAACGGGGTTATTCAGGAAATTTCCTTCGGGGAATGGAATCTTTAACCTAGTGGCGGACGGGTGAGTAACGCGTGAGCAATCTGCCTTCGGATGGGGGATAACAGCCGGAAACGGCTGCTAATACCGCATAACACATGGGATCCGCATGTTTCCCATGTCAAAGATTTATCGTCCGGAGATGAGCTCGCGTCTGATTAGCTGGTTGGCGGGGTAACGGCCCACCAAGGCGACGATCAGTAGCCGGACTGAGAGGTTGAACGGCCACATTGGGACTGAGACACGGCCCAG "Bacteria" "Firmicutes" "Clostridia" "Clostridiales" "Ruminococcaceae" "B…
GACGAACGCTGGCGGCGCGCCTAACACATGCAAGTCGAACGGAGTTTAAAGAGCTTGCTTTTTAAACTTAGTGGCGGACGGGTGAGTAACACGTGAGTAACCTACCTTTCAAAGGGGGATAACGTCTGGAAACGGACGCTAATACCGCATAATACTATTTGAGGGCATCCTTGGATAGTCAAAGGAGAAATCCGATGGGAGATGGACTCGCGGCTGATTAGATAGTTGGCGGGGTAGAGGCCCACCAAGTCGACGATCAGTAGCCGGACTGAGAGGTTGAACGGCCACATTGGGACTGAGACACGGCCCAG "Bacteria" "Firmicutes" "Clostridia" "Clostridiales" "Ruminococcaceae" NA NA
GACGAACGCTGGCGGCGCGCCTAACACATGCAAGTCGAACGGTGAAGAGGAGCTTGCTCCTCGGATCAGTGGCGGACGGGTGAGTAACACGTGAGCAACCTGCCTTTCAGTGGGGGACAACAGTTGGAAACGACTGCTAATACCGCATAACGTGCCGGAAGGGCATCCTTTTGGTACCAAAGATTTATCGCTGAAAGATGGGCTCGCGTCTGATTAGATAGTTGGTGAGGTAACGGCCCACCAAGTCGACGATCAGTAGCCGGACTGAGAGGTTGATCGGCCACATTGGGACTGAGACACGGCCCAG "Bacteria" "Firmicutes" "Clostridia" "Clostridiales" "Ruminococcaceae" "Ruminiclostridium_6…
GATGAACGCTGGCGGCGTGCTTAACACATGCAAGTCGAACGAGAATCCAGTGAAGGAGTTTTCGGACAACGGATCTGGAGGAAAGTGGCGGACGGGTGAGTAACGCGTGAGCAATCTGCCTTGGAGTGGGGAATAACGGCTGGAAACAGCCGCTAATACCGCATGATGCGTCTGGGAGGCATCTCTCTGGACGCCAAAGATTTATCGCTCTGAGATGAGCTCGCGTCTGATTAGCTTGTTGGCGGGGTAAAGGCCCACCAAGGCGACGATCAGTAGCCGGACTGAGAGGTTGGCCGGCCACATTGGGACTGAGACACGGCCCAG "Bacteria" "Firmicutes" "Clostridia" "Clostridiales" "Ruminococcaceae" NA …
GATGAACGCTGGCGGCGTGCTTAACACATGCAAGTCGAGCGAAGCACTTTTTTAGAACTCTTCGGAGGGAAGAGAGGGTGACTTAGCGGCGGACGGGTGAGTAATGCGTGGGCAACCTGCCTTACACAGGGGGATAACAATTAGAAATGATTGCTAATACCGCATAAGACCCCAGTACCGCATGGTACAGGGGTAAAAACTGAGGTGGTGTAAGATGGGCCTGCGTCTGATTAGGTAGTTGGTGGGGTAGAAGCCTACCAAGCCGACGATCAGTAGCCGACCTGAGAGGGCGACCGGCCACATTGGGACTGAGACACGGCCCAA "Bacteria" "Firmicutes" "Clostridia" "Clostridiales" "Lachnospiraceae" "La…
ATTGAACGCTGGCGGCATGCCTTACACATGCAAGTCGAACGGCAGCACGGGTGCTTGCACCTGGTGGCGAGTGGCGAACGGGTGAGTAATACATCGGAACATGTCCTGTAGTGGGGGATAGCCCGGCGAAAGCCGGATTAATACCGCATACGATCTACGGATGAAAGCGGGGGACCTTCGGGCCTCGCGCTATAGGGTTGGCCGATGGCTGATTAGCTAGTTGGTGGGGTAAAGGCCTACCAAGGCGACGATCAGTAGCTGGTCTGAGAGGACGACCAGCCACACTGGGACTGAGACACGGCCCAG "Bacteria" "Proteobacteria" "Gammaproteobacteria" "Betaproteobacteriales" "Burkholderiaceae"…
GATGAACGCTGGCGGCGTGCTTAACACATGCAAGTCGAACGAAGCACAGATGTAGAATTTCTTCGGAAAGGAAGCGCCTGTGACTGAGTGGCGGACGGGTGAGTAACGCGTGGGCAACCTGCCCCATACCGGGGGACAACAGCTGGAAACGGCTGCTAATACCGCATACGTTTTCGGTGCCGCATGGTGCTGAAAAGAAAACTCCGGTGGTATGGGATGGGCCCGCGTCTGATTAGCTAGTTGGGAGGGTAACGGCCTACCAAGGCGACGATCAGTAGCCGGCCTGAGAGGGCGACCGGCCACATTGGGACTGAGACACGGCCCAG "Bacteria" "Firmicutes" "Clostridia" "Clostridiales" "Lachnospiraceae" "…
GACGAACGCTGGCGGCGTGCTTAACACATGCAAGTCGAACGGAGCACCCCTGAAGGAGTTTTCGGACAACGGATGGGAATGCTTAGTGGCGGACTGGTGAGTAACGCGTGAGGAACCTGCCTTCCAGAGGGGGACAACAGTTGGAAACGACTGCTAATACCGCATGATGCGTTGGAGCCGCATGACTCTGACGCCAAAGATTTATCGCTGGAAGATGGCCTCGCGTCTGATTAGCTAGTTGGTGAGGTAACGGCCCACCAAGGCGACGATCAGTAGCCGGACTGAGAGGTTGGCCGGCCACATTGGGACTGAGATACGGCCCAG "Bacteria" "Firmicutes" "Clostridia" "Clostridiales" "Ruminococcaceae" "Os…
GATGAACGCTGGCGGCGTGCCTAACACATGCAAGTCGAACGGACTTATAATGAAACCTAGTGAATTATAAGTTAGTGGCGGACGGGTGAGTAACGCGTGGAAAACCTGCCGTATACTGGGGGATAACACTTAGAAATAGGTGCTAATACCGCATAAGCGCACAGCTTCGCATGAAGCAGTGTGAAAAACTCCGGTGGTATACGATGGTTCCGCGTCTGATTAGCTAGTTGGTGAGGTAAAAGCCCACCAAGGCGACGATCAGTAGCCGGCCTGAGAGGGTGAACGGCCACATTGGGACTGAGACACGGCCCAG "Bacteria" "Firmicutes" "Clostridia" "Clostridiales" "Lachnospiraceae" "Lachnospirace…
GACGAACGCTGGCGGCGTGCCTAACACATGCAAGTCGAGCGGAGACAGTGAGTAGCTTGCTATGAGCTGTTTTAGCGGCGGACGGGTGAGTAACGCGTGAGCAACCTTTCCCAGACAGGGGAATAACACACCGAAAGGTGTACTAATACCGCATAAGACCACGGGATCACATGGTTCTGAGGTAAAAGATTTATCGGTTTGGGGTGGGCTCGCGTCCGATTAGGTAGTTGGTGAGGTAACGGCCCACCAAGCCGACGATCGGTAGCCGACCTGAGAGGGTGATCGGCCACATTGGGACTGAGACACGGCCCAA "Bacteria" "Firmicutes" "Clostridia" "Clostridiales" "Christensenellaceae" "Christens…
GACGAACGCTGGCGGCGCGCCTAACACATGCAAGTCGAACGGGACTATACTGGAAGAAGTTTTCGGATGGATTTCGGTATAGTTTAGTGGCGGACGGGTGAGTAACACGTGAGCAACCTGCCTTCGAGAGGGGAATAACGGCTGGAAACGGTCGCTAATACCGCATAACATACCGGGAGGACATCCTGCTGGTATCAAAGATTTATCGCTCGAAGATGGGCTCGCGTCCGATTAGGTAGTTGGTGAGGTAACGGCTCACCAAGCCGACGATCGGTAGCCGGACTGAGAGGTTGAACGGCCACATTGGGACTGAGACACGGCCCAG "Bacteria" "Firmicutes" "Clostridia" "Clostridiales" "Ruminococcaceae" NA…
GATGAACGCTGGCGGCGTGCCTAATACATGCAAGTCGAGCGAACAGATGAGGAGCTTGCTCCTCTGACGTTAGCGGCGGACGGGTGAGTAACACGTGGATAACCTACCTATAAGACTGGGATAACTTCGGGAAACCGGAGCTAATACCGGATAATATATTGAACCGCATGGTTCAATAGTGAAAGACGGTTTTGCTGTCACTTATAGATGGATCCGCGCCGCATTAGCTAGTTGGTAAGGTAACGGCTTACCAAGGCAACGATGCGTAGCCGACCTGAGAGGGTGATCGGCCACACTGGAACTGAGACACGGTCCAG "Bacteria" "Firmicutes" "Bacilli" "Bacillales" "Staphylococcaceae" "Staphylococcu…
GATGAACGCTGGCGGCGTGCTTAACACATGCAAGTCGAACGGAGATAACATTTTCGAAGCGATTAGTTTACTAAGAGCGGAGATGTTGCTATCTTAGTGGCGGACGGGTGAGTAACGCGTGGGTAACCTGCCTTGCACTGGGGGATAACACTTAGAAATAGGTGCTAATACCGCATAACAGTAGGAGACGCATGTCTTTTACTTGAAAATTCCGGTGGTGTAAGATGGACCCGCGTCTGATTAGCTTGTTGGCGGGGTAACGGCCCACCAAGGCAACGATCAGTAGCCGGCCTGAGAGGGTGAACGGCCACATTGGGACTGAGACACGGCCCAA "Bacteria" "Firmicutes" "Clostridia" "Clostridiales" "Lachnospir…
GATGAACGCTGGCGGCATGCCTAATACATGCAAGTCGAACGAAACGAAATGAAAAGCTTGCTTTTGATTTTGTTTAGTGGCGAACGGGTGAGTAACACGTAGGTAACCTGCCCATGTACCCGGGATAACAAAGGGAAACCTTTGCTAAAACCGGATGAATTATAGCGAGGCATCTCGAAATAATAAAAGCACCTAAGGGTGTGGACATGGATGGACCTGCGGCGTATTAGCCAGTTGGCGGGGTAACGGCCCACCAAAGCGATGATACGTAGCCGGCCTGAGAGGGTAAACGGCCACACTGGGACTGAGACACGGCCCAG "Bacteria" "Firmicutes" "Erysipelotrichia" "Erysipelotrichales" "Erysipelotric…
GATGAACGCTAGCGACAGGCTTAACACATGCAAGTCGAGGGGCAGCGGGGGCACTGGTTCGCCAGTGCCTGCCGGCGACCGGCGCACGGGTGAGTAACACGTATGCAACCTGGCCTCTGCAGGGGGATAACCGGTGGAAACACCGCCTAATACCCCGCGACGCCACCCCGGGGCATCCCGGGGCGGCCAAAGGAGCGATCCGGCGGAGGATGGGCATGCGGCGCATTAGCTGGTCGGCGGGGTGACGGCCCACCGAGGCGACGATGCGTAGGGGTTCTGAGAGGAAGGCCCCCCACACTGGGACTGAGACACGGCCCAG "Bacteria" "Bacteroidetes" "Bacteroidia" "Bacteroidales" "Muribaculaceae" NA NA
GATGAACGCCGGCGGTGTGCCTAATACATGCAAGTCGTACGCACTGGCCCAACTGATTGATGGTGCTTGCACCTGATTGACGATGGATCACCAGTGAGTGGCGGACGGGTGAGTAACACGTAGGTAACCTGCCCCGGAGCGGGGGATAACATTTGGAAACAGATGCTAATACCGCATAACAACAAAAGCCACATGGCTTTTGTTTGAAAGATGGCTTTGGCTATCACTCTGGGATGGACCTGCGGTGCATTAGCTAGTTGGTAAGGTAACGGCTTACCAAGGCGATGATGCATAGCCGAGTTGAGAGACTGATCGGCCACAATGGAACTGAGACACGGTCCAT "Bacteria" "Firmicutes" "Bacilli" "Lactobacillales" "La…
GACGAACGCTGGCGGCGCGCCTAACACATGCAAGTCGAACGGACACATCCGACGGAATAGCTTGCTAGGAAGATGGATGTTGTTAGTGGCGGACGGGTGAGTAACACGTGAGCAACCTGCCTCGGAGTGGGGGACAACAGTTGGAAACGACTGCTAATACCGCATACGGTGGTCGGGGGACATCCCCTGACCAAGAAAGGATTATATCCGCTCTGAGATGGGCTCGCGTCTGATTAGCTAGTTGGCGGGGTAACGGCCCACCAAGGCAACGATCAGTAGCCGGACTGAGAGGTTGAACGGCCACATTGGGACTGAGACACGGCCCAG "Bacteria" "Firmicutes" "Clostridia" "Clostridiales" "Ruminococcaceae" …
AGCGAACGCTGGCGGCAGGCCTAACACATGCAAGTCGAACGAACTCTTCGGAGTTAGTGGCGGACGGGTGAGTAACACGTGGGAACGTGCCTTTAGGTTCGGAATAACTCAGGGAAACTTGAGCTAATACCGGATGTGCCCTTCGGGGGAAAGATTTATCGCCTTTAGAGCGGCCCGCGTCTGATTAGCTAGTTGGTGAGGTAAAGGCTCACCAAGGCGACGATCAGTAGCTGGTCTGAGAGGATGATCAGCCACATTGGGACTGAGACACGGCCCAA "Bacteria" "Proteobacteria" "Alphaproteobacteria" "Caulobacterales" "Caulobacteraceae" "Brevundimonas" "vesicularis"
GATGAACGCCGGCGGTGTGCCTAATACATGCAAGTCGTACGCACTGGCCCAACTGATTGATGGTGCTTGCACCGGATTGACGATGGATCACCAGTGAGTGGCGGACGGGTGAGTAACACGTAGGTAACCTGCCCCGGAGCGGGGGATAACATTTGGAAACAGATGCTAATACCGCATAACAACAAAAGCCACATGGCTTTTGCTTGAAAGATGGCTTTGGCTATCACTCTGGGATGGACCTGCGGTGCATTAGCTAGTTGGTAAGGTAATGGCTTACCAAGGCGATGATGCATAGCCGAGTTGAGAGACTGATCGGCCACAATGGAACTGAGACACGGTCCAT "Bacteria" "Firmicutes" "Bacilli" "Lactobacillales" "La…
GATGAACGCTAGCGGCAGGCTTAACACATGCAAGTCGAGGGGCAGCGGGGTGTAGCAATACACTGCCGGCGACCGGCGCACGGGTGCGTAACGCGTATGCAACCTACCCATAACAGGGGCATAACACTGAGAAATTGGTACTAATTCCCCATAACATTCGAAGAGGCATCTCTTTGGGTTGAAAACTCCGGTGGTTATGGATGGGCATGCGTTGTATTAGCTAGTTGGTGAGGTAACGGCTCACCAAGGCGACGATACATAGGGGGACTGAGAGGTTAACCCCCCACATTGGTACTGAGACACGGACCAA "Bacteria" "Bacteroidetes" "Bacteroidia" "Bacteroidales" "Rikenellaceae" "Alistipes" NA
GATAAACGCTGGCGGCGCACATAAGACATGCAAGTCGAACGGACTTAACCATTAGTTTACTATTGGGGCGGTTAGTGGCGGACTGGTGAGTAACACGTAAGCAACCTGCCTATCAGAGGGGAACAACAGTTAGAAATGACTGCTAATACCGCATATACCTAAGTAACGCATGTTACAATAGGGAAAGGAGAAATCCGCTGATAGATGGGCTTGCGTCTGATTAGATAGTTGGTGGGGTAAAGGCCTACCAAGTCGACGATCAGTAGCCGGACTGAGAGGTTGAACGGCCACATTGGGACTGAGATACGGCCCAG "Bacteria" "Firmicutes" "Clostridia" "Clostridiales" "Ruminococcaceae" "Ruminococcac…
GATGAACGCTGGCGGCGTGCCTAACACATGCAAGTCGAGCGGGAAATTTCGGACAGAGACTTCGGTTAAAGGAAGAAATGGATAGCGGCGGACGGGTGAGTAACGCGTAGGCAACCTGCCCTTCACAGAGGGATAGCCACTGGAAACGGTGATTAATACCTCATAACGCAAGTCAATCACATGGTTGATTTGCCAAAGATTTATCGGTGAGGGATGGGCCTGCGTCTGATTAGTTAGTTGGTGGGGTAACGGCCTACCAAGGCAACGATCAGTAGCCGACCTGAGAGGGTAATCGGCCACATTGGAACTGAGACACGGTCCAA "Bacteria" "Firmicutes" "Clostridia" "Clostridiales" "Family_XIII" "Anaerov…
GACGAACGCTGGCGGCGCGCCTAACACATGCAAGTCGAACGAGCGAGAGAGAGCTTGCTTTCTCGAGCGAGTGGCGAACGGGTGAGTAACGCGTGAGGAACCTGCCTCAAAGAGGGGGACAACAGTTGGAAACGACTGCTAATACCGCATAAGCCCACGGCTCGGCATCGAGCAGAGGGAAAAGGAGCAATCCGCTTTGAGATGGCCTCGCGTCCGATTAGCTAGTTGGTGAGGTAATGGCCCACCAAGGCGACGATCGGTAGCCGGACTGAGAGGTTGAACGGCCACATTGGGACTGAGACACGGCCCAG "Bacteria" "Firmicutes" "Clostridia" "Clostridiales" "Ruminococcaceae" "Faecalibacteriu…
GATGAACGCTGGCGGCGTGCTTAACACATGCAAGTCGAACGGGGTACCCCCAAAGGAGTTTTCGGACAACTGCGGGGAATACCTAGTGGCGGACGGGTGAGTAACGCGTGAGTAACCTGCCTTGGAGTGGGGAATAACAGCTGGAAACAGCTGCTAATACCGCATAATGCAGTTGAGTCGCATGGCTCTGACTGCCAAAGATTTATCGCTCTGAGATGGACTCGCGTCTGATTAGCTAGTTGGTGGGGCAACGGCCCACCAAGGCAACGATCAGTAGCCGGACTGAGAGGTTGGCCGGCCACATTGGGACTGAGACACGGCCCAG "Bacteria" "Firmicutes" "Clostridia" "Clostridiales" "Ruminococcaceae" "R…
GATGAACGCTGGCGGCGTGCTTAACACATGCAAGTCGAGCGAAGCACTTTTTTAGAACTCTTCGGAGGGAAGAGAGGGTGACTGAGCGGCGGACGGGTGAGTAACGCGTGGGCAACCTGCCTTACACAGGGGGATAACAATTAGAAATGATTGCTAATACCGCATAAGACCACGGCCTCGCATGAGGGAGTGGTAAAAACTGAGGTGGTGTAAGATGGGCCCGCGTCTGATTAGGTAGTTGGTGGGGTAGAAGCCTACCAAGCCGACGATCAGTAGCCGACCTGAGAGGGTGACCGGCCACATTGGGACTGAGACACGGCCCAA "Bacteria" "Firmicutes" "Clostridia" "Clostridiales" "Lachnospiraceae" "La…
GATGAACGCTGGCGGCGTGCTTAACACATGCAAGTCGAACGAAGCACTACCGACGGAACTTTTCGGAGGGAAGATGGTAATGACTGAGTGGCGGACGGGTGAGTAACGCGTGGGCAACCTGCCCCATAGAGGGGGACAACAGCTGGAAACGGCTGCTAATACCGCATAACAAGGAGAGAGCGCATGTTCTTTTCTTCAAAGATTTATCGCTATGGGATGGACCCGCGTCTGATTAGCTGGTTGGTGAGGTAACGGCTCACCAAGGCGACGATCAGTAGCCGGCTTGAGAGAGTGGACGGCCACATTGGGACTGAGACACGGCCCAG "Bacteria" "Firmicutes" "Clostridia" "Clostridiales" "Lachnospiraceae" N…
GACGAACGCTGGCGGCGCGCCTAACACATGCAAGTCGAACGGGACTATACGAGATGAAGTTTTCGGATGGAATTTTGGATAGTTTAGTGGCGGACGGGTGAGTAACACGTGAGCAACCTGCCTTCGAGAGGGGAATAACGGCTGGAAACGGTCGCTAATACCGCATAACATACAGGGGGGACATCCCTTTTGTATCAAAGATTTATCGCTCGAAGATGGGCTCGCGTCCGATTAGGTAGTTGGTGAGGTAACGGCCCACCAAGCCGACGATCGGTAGCCGGACTGAGAGGTTGAACGGCCACATTGGGACTGAGACACGGCCCAG "Bacteria" "Firmicutes" "Clostridia" "Clostridiales" "Ruminococcaceae" NA…
GATAAACGCTGGCGGCGCACATAAGACATGCAAGTCGAACGGACTTAATCTTAATATTTATATTGAGAAGCGGTTAGTGGCGGACTGGTGAGTAACGCGTAAGCAATCTACCTATTAGAGGGGAATAACAGTGAGAAATCATTGCTAATACCGCATATGCCATAAGAACCACATGGTTCTAGTGGGAAAGGAGCAATCCGCTAATAGATGAGCTTGCGTCTGATTAGCTAGTTGGTGTGGTAATGGCACACCAAGGCAACGATCAGTAGCCGGACTGAGAGGTTGAACGGCCACATTGGGACTGAGATACGGCCCAG "Bacteria" "Firmicutes" "Clostridia" "Clostridiales" "Ruminococcaceae" "Ruminococ…
AGTGAACGCTGGCGGCAGGCCTAACACATGCAAGTCGAACGGCAGCGGGTAGGAAGCTTGCTTCCTATGCCGGCGAGTGGCGGACGGGTGAGGAACACATCGGAATCTACTCCGTCGTGGGGGATAACGTAGGGAAACTTACGCTAATACCGCATACGACCTAAGGGTGAAAGTGGGGGACCGCAAGGCCTCACGCGATGGAATGAGCCGATGTCCGATTAGCTAGTTGGCGGGGTAAAGGCCCACCAAGGCGACGATCGGTAGCTGGTCTGAGAGGATGATCAGCCACACTGGGACTGAGACACGGCCCAG "Bacteria" "Proteobacteria" "Gammaproteobacteria" "Xanthomonadales" "Xanthomonadaceae"…
AACGAACGCTGGCGGCAGGCCTAACACATGCAAGTCGAACGCCCCGCAAGGGGAGTGGCAGACGGGTGAGTAACACGTGGGAACCTTCCCTATAGTACGGAATAGCCCAGGGAAACTTGGAGTAATACCGTATACGCCCGAAAGGGGAAAGAATTTCGCTATAGGATGGGCCCGCGTAGGATTAGCTAGTTGGTGAGGTAATGGCTCACCAAGGCGACGATCCTTAGCTGGTTTGAGAGAACGACCAGCCACACTGGGACTGAGACACGGCCCAG "Bacteria" "Proteobacteria" "Alphaproteobacteria" "Rhizobiales" "Hyphomicrobiaceae" "Hyphomicrobium" "denitrificans"
GACGAACGCTGGCGGCGCGCCTAACACATGCAAGTCGAACGAGAGATGAGGAGCTTGCTCTTCAAATCGAGTGGCGAACGGGTGAGTAACGCGTGAGGAACCTGCCTCAAAGAGGGGGACAACAGTTGGAAACGACTGCTAATACCGCATAAGCCCACGGCTCGGCATCGAGCAGAGGGAAAAGGAGTGATCCGCTTTGAGATGGCCTCGCGTCCGATTAGCTAGTTGGTGAGGTAACGGCCCACCAAGGCGACGATCGGTAGCCGGACTGAGAGGTTGAACGGCCACATTGGGACTGAGACACGGCCCAG "Bacteria" "Firmicutes" "Clostridia" "Clostridiales" "Ruminococcaceae" "Faecalibacteriu…
GATAAACGCTGGCGGCGCACATAAGACATGCAAGTCGAACGGACTTAACCATTAGTTTACTATTGGAGCGGTTAGTGGCGGACTGGTGAGTAACACGTAAGCAACCTGCCTATCAGAGGGGAACAACAGTTAGAAATGACTGCTAATACCGCATATGCCTAAGTACCACATGGTACAATAGGGAAAGGAGAAATCCGCTGATAGATGGGCTTGCGTCTGATTAGATAGTTGGTGGGGTAAAGGCCTACCAAGTCAACGATCAGTAGCCGGACTGAGAGGTTGAACGGCCACATTGGGACTGAGATACGGCCCAG "Bacteria" "Firmicutes" "Clostridia" "Clostridiales" "Ruminococcaceae" "Ruminococcac…
ATTGAACGCTGGCGGCAGGCCTAACACATGCAAGTCGAGCGGATGACGGGAGCTTGCTCCCTGATTTAGCGGCGGACGGGTGAGTAATGCCTAGGAATCTGCCTGGTAGTGGGGGATAACGTTCCGAAAGGAACGCTAATACCGCATACGTCCTACGGGAGAAAGCAGGGGACCTTCGGGCCTTGCGCTATCAGATGAGCCTAGGTCGGATTAGCTAGTTGGTGAGGTAATGGCTCACCAAGGCGACGATCCGTAACTGGTCTGAGAGGATGATCAGTCACACTGGAACTGAGACACGGTCCAG "Bacteria" "Proteobacteria" "Gammaproteobacteria" "Pseudomonadales" "Pseudomonadaceae" "Pseudo…
GATGAACGCCGGCGGTGTGCCTAATACATGCAAGTCGTACGCACTGGCCCAACTGATTGATGGTGCTTGCACCTGATTGACGATGGATCACCAGTGAGTGGCGGACGGGTGAGTAACACGTAGGCAACCTGCCCCGGAGCGAGGGATAACATTTGGAAACAGATGCTAATACCGCATAACAACAAAAGTCACATGGCTTTTGTTTGAAAGATGGCTTTGGCTATCACTCTGGGATGGGCCTGCGGTGCATTAGCTAGTTGGTAAGGTAACGGCTTACCAAGGCGATGATGCATAGCCGAGTTGAGAGACTGATCGGCCACAATGGAACTGAGACACGGTCCAT "Bacteria" "Firmicutes" "Bacilli" "Lactobacillales" "La…
GATGAACGCTGGCGGCGTGCCTAACACATGCAAGTCGAACGAATAACCCGCCTTCGGGCGGTCATAGAGTGGCGAACGGGTGAGTAACACGTGACCAACCTGCCCCGCACCCCGGGACAACCGCCGGAAACGGCGGCTAATACCGGATACTCCGGGCCTCGCGCATGCGCGGCCCGGGAAAGCCCAGACGGTGCGGGATGGGGTCGCGGCCCATTAGGTAGTAGGCGGGGCAACGGCCCACCTAGCCTGCGATGGGTAGCCGGCCTGAGAGGGCGATCGGCCACATTGGGACTGAGATACGGCCCAG "Bacteria" "Actinobacteria" "Coriobacteriia" "Coriobacteriales" "Eggerthellaceae" "Denitrob…
GATGAACGCTGGCGGCGCGCCTAACACATGCAAGTCGAACGAGAAGCACCTCTTCGGAGGTGTGGATAGTGGCGAACGGCTGAGTAACACGTGGGCAACCTGCCCCTCTCATCGGGATAGCCTCGGGAAACCGGGGATAATACCGGATACTCCAATGCTTTCGCATGGAAGCGTTGGGAAAGCTCTGGCGGAGAGGGATGGGCCCGCGGCCTGTTAGCTAGTTGGCGGGGTAACGGCCCACCAAGGCTTCTATGGGTAGCCGGGTTGAGAGACCGACCGGCCAGATTGGGACTGAGACACGGCCCAG "Bacteria" "Actinobacteria" "Coriobacteriia" "Coriobacteriales" "Atopobiaceae" "Coriobacter…
GATGAACGCTGGCGGCGTGCTTAACACATGCAAGTCGAGCGAAAATAATTGAGAGCTTGCTTTTGATTATTTTAGCGGCGGACGGGTGAGTAACGTGTGGGTAACCTGCCTTTTACTGTGGAATAATCGTTGGAAACGACGACTAATACCGCATACGATTTTCTGAAGGCATCTTTGGGAAAAGAAAGGAAATATTCGGTAAAAGATGGGCCCGCATCTGATTAGCTAGTTGGTGAGATAACAGCCCACCAAGGCAACGATCAGTAGCCGACCTGAGAGGGTGACCGGCCACATTGGGACTGAGACACGGCCCAA "Bacteria" "Firmicutes" "Clostridia" "Clostridiales" "Lachnospiraceae" "ASF356" NA
GATGAACGCTGGCGGCGTGCTTAACACATGCAAGTCGAACGAAGCATGGCGTTGGAAATTTTTCGGAATGGAAGATGCCATGACTGAGTGGCGGACGGGTGAGTAACGCGTGGGCAACCTGCCCCACACAGGGGGATAACAGCCGGAAACGGCTGCTAATACCGCATAAGCGCACAGCTTCGCATGAAGCGGTGTGAAAAGCCTTCGGGCGGTGTGGGATGGGCCCGCGTCTGATTAGCTGGTTGGCGGGGCAGCGGCCCACCAAGGCGACGATCAGTAGCCGGCCTGAGAGGGTGGACGGCCACATTGGGACTGAGACACGGCCCAA "Bacteria" "Firmicutes" "Clostridia" "Clostridiales" "Lachnospiraceae"…
GATAAACGCTGGCGGCGCACATAAGACATGCAAGTCGAACGAACTTAACCTTTAGTTTACTATTGGAGCGGTTAGTGGCGGACTGGTGAGTAACACGTAAGCAACCTGCCTATCAGAGGGGAACAACAGTTAGAAATGACTGCTAATACCGCATATGCCATGAGTATCACATGATACAAATGGGAAAGGAGCAATCCGCTGATAGATGGGCTTGCGTCTGATTAGATAGTTGGTGGGGTAATGGCCTACCAAGTCAACGATCAGTAGCCGAACTGAGAGGTTGAACGGCCACATTGGGACTGAGATACGGCCCAG "Bacteria" "Firmicutes" "Clostridia" "Clostridiales" "Ruminococcaceae" "Ruminococca…
GATGAACGCTAGCGGCAGGCCTAACACATGCAAGTCGAGGGGCAGCATTTATGTAGTAATACATGAGATGGCGACCGGCGCACGGGTGCGTAACGCGTATGTAACCTACCTTAAACAGGGGGATAACACTGAGAAATCGGTACTAATACCCCATAATACTATTGGAGGCATCTCCGATAGTTGAAAGTTCCGGCGGTTTAAGATGGACATGCGTTGTATTAGTTAGTTGGTGAGGTAACGGCTCACCAAGGCAACGATACATAGGGGGACTGAGAGGTTAACCCCCCACATTGGTACTGAGACACGGACCAA "Bacteria" "Bacteroidetes" "Bacteroidia" "Bacteroidales" "Rikenellaceae" "Alistipes" NA
GATAAACGCTGGCGGCGCACATAAGACATGCAAGTCGAACGAACTTAATTCGAATGTTTACATTTGGAAGCGGTTAGTGGCGGACTGGTGAGTAACACGTAAGCAACCTGCCTATCAGAGGGGAATAACAGTGAGAAATCATTGCTAATACCGCATATGCTGTGAGTATCGCATGATACAAACAGGAAAGGAGCAATCCGCTGATAGATGGGCTTGCGTCTGATTAGATAGTTGGTGGGGTAAAGGCCTACCAAGTCGACGATCAGTAGCCGAACTGAGAGGTTGAACGGCCACATTGGGACTGAGATACGGCCCAG "Bacteria" "Firmicutes" "Clostridia" "Clostridiales" "Ruminococcaceae" "Ruminococ…
GATGAACGCTGGCGGCGTGCTTAACACATGCAAGTCGAACGGGAAACATTTTATTGAAGCTTCGGCAGATTTAGCTTGTTTCTAGTGGCGGACGGGTGAGTAACGCGTGGGTAACCTGCCTTATACTGGGGGATAACAGCCAGAAATGGCTGCTAATACCGCATAAGCGCACAGAACCGCATGGTTCGGGGTGAAAAACTCCGGTGGTATAAGATGGACCCGCGTTGGATTAGCTAGTTGGCAGGGCAGCGGCCTACCAAGGCGACGATCCATAGCCGGCCTGAGAGGGTGAACGGCCACATTGGGACTGAGACACGGCCCAG "Bacteria" "Firmicutes" "Clostridia" "Clostridiales" "Lachnospiraceae" "Bla…
GATAAACGCTGGCGGCGCACATAAGACATGCAAGTCGAACGGACTTAACCATAAGTTTACTTTTGGAGCGGTTAGTGGCGGACTGGTGAGTAACACGTAAGTAACCTGCCTATCAGAGGGGAACAACAGTTAGAAATGACTGCTAATACCGCATATGCCATAGCCATCGCATGGTGGCAGTGGGAAAGGAGAAATCCGCTGATAGATGGACTTGCGACTGATTAGATAGTTGGTGGGGTAAAGGCCTACCAAGTCGACGATCAGTAGCCGAACTGAGAGGTTAAACGGCCACATTGGGACTGAGATACGGCCCAG "Bacteria" "Firmicutes" "Clostridia" "Clostridiales" "Ruminococcaceae" "Ruminococca…
GATGAACGCTGGCGGCGTGCCTAACACATGCAAGTCGAACGAAGCGTTTACACGGATTTCCTTCGGGGATGAAGGGTTTATGACTGAGTGGCGGACGGGTGAGTAACGCGTGGGCAACCTGCCCCGTACCGGGGGACAACAGCCGGAAACGGCTGCTAATACCGTATACGTTTTAAGGACCGCATGGTCCGTAAAACAAAACTCCGGTGGTACGGGATGGGCCCGCGTCTGATTAGCTCGTTGGCGGGGTAACGGCCCACCAAGGCGACGATCAGTAGCCGGCCTGAGAGGGCGGCCGGCCACATTGGGACTGAGACACGGCCCAG "Bacteria" "Firmicutes" "Clostridia" "Clostridiales" "Lachnospiraceae" "…
GATGAACGCTGGCGGCGTGCTTAACACATGCAAGTCGAACGAGAATCCGGGGAAGGAGGCTTCGGCCAACGGAACTGGAGGAAAGTGGCGGACGGGTGAGTAACGCGTGAGTAACCTGCCTTGGAGAGGGGAATAACACATCGAAAGATGTGCTAATACCGCATGAAATGTCTGAATCGCATGGTTCTGGACATCAAAGATTTATCGCTCTGAGATGGACTCGCGTCTGATTAGCTGGTTGGCGGGGTAACGGCCCACCAAGGCGACGATCAGTAGCCGGACTGAGAGGTTGGCCGGCCACATTGGGACTGAGACACGGCCCAG "Bacteria" "Firmicutes" "Clostridia" "Clostridiales" "Ruminococcaceae" "Ru…
GATAAACGCTGGCGGCGCACATAAGACATGCAAGTCGAACGGACTTAATTCGAATGTTTACATTTGAAAGCGGTTAGTGGCGGACTGGTGAGTAACACGTAAGCAACCTGCCTGTTAGAGGGGAATAACAGTGAGAAATCATTGCTAATACCGCATATGCCATAGTCATCACATGATGATAGTGGGAAAGGAGCAATCCGCTAACAGATGGGCTTGCGTCTGATTAGATAGTTGGTGGGGTAACGGCCTACCAAGTCGACGATCAGTAGCCGGACTGAGAGGTTGAACGGCCACATTGGGACTGAGATACGGCCCAG "Bacteria" "Firmicutes" "Clostridia" "Clostridiales" "Ruminococcaceae" "Ruminococ…
GATGAACGCTGGCGAGATGCCTTACACATGCAAGTCGTACGGGAATTTTTAATTCAAGTGGCGGACGGGTGAGTAACACGTAAGAATTTGCCTTTAGGAGGGGGACAACAACTGGAAACGGTTGCTAATACCCCATATGCTTTCGAGTGAAATGGATTTTTCCGCCTAAAGAGAAGCTTGCGGCTGATTAGCTTGTTGGTGAGGTAATGGCTCACCAAGGCGACGATCAGTATCTGGTTTGAGAGGATGATCAGACACACTGGAACTGAGACACGGTCCAG "Bacteria" "Cyanobacteria" "Oxyphotobacteria" "Chloroplast" NA NA NA
GATAAACGCTGGCGGCGCACATAAGACATGCAAGTCGAACGAACTTAATCTCTTGCTTGCAAGAGAAGCGGTTAGTGGCGGACTGGTGAGTAACACGTAAGAAATCTGCCTATCAGAGGGGAATAACAATGAGAAATCATTGCTAATACCGCATATGCCATAGGGCTCGCATGAGCCTAGTGGGAAAGGAGTAATCCGCTGATAGATGAGCTTGCGTCTGATTAGCTAGTTGGTGGGGTAAAGGCCTACCAAGGCGACGATCAGTAGCCGGACTGAGAGGTTGAACGGCCACATTGGGACTGAGATACGGCCCAG "Bacteria" "Firmicutes" "Clostridia" "Clostridiales" "Ruminococcaceae" "Ruminococca…
GATGAACGCTAGCTACAGGCTTAACACATGCAAGTCGAGGGGAAACGATATTGGAAGCTTGCTTCCGATAGGCGTCGACCGGCGCACGGGTGAGTAACGCGTATCCAACCTGCCCATCACTTGGGAATAACCTTGCGAAAGTAAGACTAATGCCCAATGACATTTATAGAAGGCATCTGAAATGAATTAAAGATTTATCGGTGATGGATGGGGATGCGTCTGATTAGCTTGTTGGCGGGGTAACGGCCCACCAAGGCGACGATCAGTAGGGGTTCTGAGAGGAAGGTCCCCCACATTGGAACTGAGACACGGTCCAA "Bacteria" "Bacteroidetes" "Bacteroidia" "Bacteroidales" "Prevotellaceae" "Prevot…
GATGAACGCTGGCGGCGTGCTTAACACATGCAAGTCGAACGAAGCACTTGAGATTGATTCTTCGGATGACGTCTTTTGTGACTTAGTGGCGGACGGGTGAGTAACGCGTGGGTAACCTGCCTCACACAGGGGGATAACAGTTAGAAATGACTGCTAATACCGCATAACCCGATAGGATCGCATGATCCAGACGGAAAAGATTTATCGGTGTGAGATGGACCCGCGTCTGATTAGCTAGTTGGTGAGGTAACGGCCCACCAAGGCGACGATCAGTAGCCGGCCTGAGAGGGTGAACGGCCACATTGGGACTGAGACACGGCCCAA "Bacteria" "Firmicutes" "Clostridia" "Clostridiales" "Lachnospiraceae" NA …
GATGAACGCTAGCGACAGGCTTAACACATGCAAGTCGAGGGGCAGCGGGGGCGAAGCTTGCTTCGCCTGCCGGCGACCGGCGCACGGGTGAGTAACACGTATGCGACCTGCCCCCCCGCAGGGGGATAACCGGGAGAAATCCCGACTAATACCGCGTAACGCCGCGGGGCTGCATGGCCCCGCGGCCAAAGGAAGCGATTCCGGCGGGGGATGGGCATGCGGCGCATTAGCTAGTCGGCGGGGTAACGGCCCACCGAGGCGACGATGCGTAGGGGTTCTGAGAGGAAGGTCCCCCACACTGGTACTGAGACACGGACCAG "Bacteria" "Bacteroidetes" "Bacteroidia" "Bacteroidales" "Muribaculaceae" NA NA
GACGAACGCTGGCGGCGTGCTTAACACATGCAAGTCGAACGGAGTTTCTTAGACAGAAGCCTTCGGGTGGACGACTTTGAAACTTAGTGGCGGACGGGTGAGTAACACGTGGGTAACCTGCCCCATAAACCGGGACAACAGTTGGAAACGACTGCTAATACCGGATACTCTCGCGAGGAGGCATCTCTTTGCGAGGAAAGGTGGCCTCTGAATATGCTACCGATATGGGATGGACCCGCGTCTGATTAGCTAGTTGGTGGGGTAACGGCCTACCAAGGCGACGATCAGTAGCCGGCCTGAGAGGGTGACCGGCCACATTGGGACTGAGACACGGCCCAA "Bacteria" "Firmicutes" "Clostridia" "Clostridiales" "Pepto…
GATGAACGCTAGCTACAGGCTTAACACATGCAAGTCGAGGGGCAGCGGGATTGAAGCTTGCTTCAATTGCCGGCGACCGGCGCACGGGTGAGTAACGCGTATCCAACCTTCCGTACACTCAGGGATAGCCTTTCGAAAGAAAGATTAATACCTGATGGTATCTTAAGCACACATGTAATTAAGATTAAAGATTTATCGGTGTACGATGGGGATGCGTTCCATTAGGTAGTAGGCGGGGTAACGGCCCACCTAGCCAACGATGGATAGGGGTTCTGAGAGGAAGGTCCCCCACATTGGAACTGAGACACGGTCCAA "Bacteria" "Bacteroidetes" "Bacteroidia" "Bacteroidales" "Bacteroidaceae" "Bacteroi…
GATAAACGCTGGCGGCGCACATAAGACATGCAAGTCGAACGGACTTAACCGAAGTATTTATATTTTGGAGCGGTTAGTGGCGGACTGGTGAGTAACACGTAAGCAACCTGCCTATTAGAGGGGAATAACAGTGAGAAATCATTGCTAATACCGCATATGCTGTGAGTATCGCATGATACAAACAGGAAAGGAGCAATCCGCTAATAGATGGGCTTGCGTCTGATTAGATAGTTGGTGGGGTAACGGCCTACCAAGTCAACGATCAGTAGCCGAACTGAGAGGTTGAACGGCCACATTGGGACTGAGATACGGCCCAG "Bacteria" "Firmicutes" "Clostridia" "Clostridiales" "Ruminococcaceae" "Ruminococ…
GATGAACGCTGGCGGCGTGCTTAACACATGCAAGTCGAACGATGAAGCCCAGCTTGCTGGGTGGATTAGTGGCGAACGGGTGAGTAACACGTGAGTAACCTGCCCTTAACTCTGGGATAAGCCTGGGAAACTAGGTCTAATACCGGATAGGAGCGCCTACCGCATGGTGGGTGTTGGAAAGATTTATCGGTTTTGGATGGACTCGCGGCCTATCAGCTTGTTGGTGAGGTAATGGCTCACCAAGGCGACGACGGGTAGCCGGCCTGAGAGGGTGACCGGCCACACTGGGACTGAGACACGGCCCAG "Bacteria" "Actinobacteria" "Actinobacteria" "Micrococcales" "Micrococcaceae" "Micrococcus" …
GATGAACGCCGGCGGTGTGCCTAATACATGCAAGTCGTACGCACTGGCCCAACTGATTGATGGTGCTTGCACCTGATTGACGATGGATCACCAGTGAGTGGCGGACGGGTGAGTAACACGTAGGTAACCTGCCCCGGAGCGGGGGATAACATTTGGAAACAGATGCTAATACCGCATAACAACAAAAGCTGCATGGCTTTTGTTTGAAAGATGGCTTTGGCTATCACTCTGGGATGGACCTGCGGTGCATTAGCTAGTTGGTAAGGTAACGGCTTACCAAGGCGATGATGCATAGCCGAGTTGAGAGACTGATCGGCCACAATGGAACTGAGACACGGTCCAT "Bacteria" "Firmicutes" "Bacilli" "Lactobacillales" "La…
GATGAACGCTGGCGGCGTGCTTAACACATGCAAGTCGAACGAAGCACTTAGGAAAGATTCTTCGGATGAAAGCCTTTGTGACTGAGTGGCGGACGGGTGAGTAACGCGTGGGTAACCTACCTCATACAGGGGGATAACAGTTGGAAACGACCGCTAATACCGCATAAGCCAACAGAACCGCATGGTTTAGCTGGAAAAGAATGATCGGTATGAGATGGACCCGCGTCTGATTAGCCAGTTGGCAGGGTAACGGCCTACCAAAGCGACGATCAGTAGCCGGCCTGAGAGGGTGAACGGCCACATTGGGACTGAGACACGGCCCAA "Bacteria" "Firmicutes" "Clostridia" "Clostridiales" "Lachnospiraceae" NA …
GATGAACGCTGGCGGCGTGCTTAACACATGCAAGTCGAACGGGTCATAGGGGCTTGCTCCTATGACTAGTGGCGGACGGGTGAGTAACGCGTGAGCAATCTGCCTCTGTTTGGGGGATAACAGGTAGAAATACCTGCTAATACCGCATAAGACCACAGTCGGGCATCCGACAGGGGTAAAAGATTTATCGAACAGAGATGAGCTCGCGTCCCATTAGCTAGTTGGTAGGGTAACGGCCTACCAAGGCTACGATGGGTAGCCGACCTGAGAGGGTAATCGGCCACATTGGAACTGAGAAACGGTCCAA "Bacteria" "Firmicutes" "Clostridia" "Clostridiales" "Clostridiales_vadinBB60_group" NA NA
AATAAACGTTGGCGGCGTGCTTAACACATGCAAGTCGAGCGAGAAAGGTCTTCGGATTGAGTACAGCGGCAAACGGGTGAGTAACACGTGGGAATCTACCTTTTAGTGAAGAACACCCTCGAGAAATCGAGGTTAATACTGCATACGTCTCGAAAGAGAGAAAGATGGCCTCTTTGCTGTCGCTGAAAGATGAGCCTGCGTACTATTAGCTAGTTGGTAGGGTAAAGGCCTACCAAGGCGATGATGGTTAGCCGGCCTGAGAGGGTGTACGGCCACACTGGAACTTAGACACGGTCCAG "Bacteria" "Dependentiae" "Babeliae" "Babeliales" "Babeliaceae" NA NA
GATGAACGCTGGCGGCGTGCCTAACACATGCAAGTCGAACGGATCCATACTGAAACCTAGTGATGTATGGATTAGTGGCGGACGGGTGAGTAACGCGTGGATAACCTGCCGTATACAGGGGGATAACACTTAGAAATAGGTGCTAATACCGCATAAGCGCACGGTTCCGCATGGAACAGTGTGAAAAACTCCGGTGGTATACGATGGATCCGCGTCTGATTAGCCAGTTGGTGGGGTAACGGCCCACCAAAGCGACGATCAGTAGCCGGCCTGAGAGGGTGAACGGCCACATTGGGACTGAGACACGGCCCAA "Bacteria" "Firmicutes" "Clostridia" "Clostridiales" "Lachnospiraceae" "Lachnospirace…
GATGAACGCTGGCGGCGTGCTTAACACATGCAAGTCGAACGGAGCACCCCTGAAGGAGTTTTCGGACAACTGATGGGAATGCTTAGTGGCGGACGGGTGAGTAACGCGTGAGCAACCTGCCTTGGAGTGGGGAATAACAGCTGGAAACAGCTGCTAATACCGCATAATATGTCTGAACCGCATGGCTCTGGACATCAAAGATTTATCGCTCTGAGATGGACTCGCGTCTGATTAGCTAGTTGGTGGGGCAACGGCCCACCAAGGCGACGATCAGTAGCCGGACTGAGAGGTTGGCCGGCCACATTGGGACTGAGACACGGCCCAG "Bacteria" "Firmicutes" "Clostridia" "Clostridiales" "Ruminococcaceae" "R…
GATGAACGCTGGCGGCATGCCTAAGACATGCAAGTCGAACGAGGTGGCCCAAAGAAGATTGAGTGCTTGCACAAGATTGGACTTGGATTACCACCTAGTGGCGGACGGGTGAGTAACACGTAGGTGACCTGCCTTTGAGTTTGGGATAACTATTAGAAATGATAGCTAATACCGGATTAAATGCAGATTCGTTTCTGTATTAAAAGGAGCCTTTAAAGCTTCGCTTAAAGATGGGCCTGCGGCGTATTAGCTAGTTGGTGAGGTAATGGCTTACCAAGGCGACGATGCGTAGCCGAACTGAGAGGTTGATCGGCCACATTGGGACTGAGACACGGCCCAA "Bacteria" "Tenericutes" "Mollicutes" "Mollicutes_RF39" NA…
GATGAACGCTGGCGGCGTGCCTAACACATGCAAGTCGAACGGACTTAAATTGAAACCTAGTGAAGTTTAAGTTAGTGGCGGACGGGTGAGTAACGCGTGGATAACCTGCCGTATGCAGGGGGATACCAACTGGAAACAGTTGCTAATACCGCATAAGCGCACAGTACCGCATGGTATAGTGTGAAAAGATTTATCGGCATACGATGGATCCGCGTCCGATTAGCCAGTTGGCGGGGTAGAAGCCCACCAAAGCGACGATCGGTAGCCGGCCTGAGAGGGCGGACGGCCACATTGGGACTGAGACACGGCCCAA "Bacteria" "Firmicutes" "Clostridia" "Clostridiales" "Lachnospiraceae" NA NA
GATAAACGCTGGCGGCGCACATAAGACATGCAAGTCGAACGGACTTAACCATTAGTTTACTATTGGAGCGGTTAGTGGCGGACTGGTGAGTAACACGTAAGCAACCTGCCTATCAGAGGGGAACAACAGTTAGAAATGACTGCTAATACCGCATATACCTAAGCATCGCATGATGCAATAGGGAAAGGAGCAATCCGCTGATAGATGGGCTTGCGTCTGATTAGATAGTTGGTGGGGTAACGGCCTACCAAGTCGACGATCAGTAGCCGGACTGAGAGGTTGAACGGCCACATTGGGACTGAGATACGGCCCAG "Bacteria" "Firmicutes" "Clostridia" "Clostridiales" "Ruminococcaceae" "Ruminococcac…
GACGAACGCTGGCGGCGTGCTTAACACATGCAAGTCGAACGGAGCACCCCTGAAGGAGTTTTCGGACAACGGATGGGAATGCTTAGTGGCGGACTGGTGAGTAACGCGTGAGGAACCTGCCTTCCAGAGGGGGACAACAGTTGGAAACGACTGCTAATACCGCATGACGCATTGGTGTCGCATGGCACTGATGTCAAAGATTTATCGCTGGAAGATGGCCTCGCGTCTGATTAGCTAGTTGGTGAGGTAACGGCCCACCAAGGCGACGATCAGTAGCCGGACTGAGAGGTTGGCCGGCCACATTGGGACTGAGATACGGCCCAG "Bacteria" "Firmicutes" "Clostridia" "Clostridiales" "Ruminococcaceae" "Os…
GATGAACGCTAGCGGGAGGCCTAATACATGCAAGTCGAGCGGTCAGCAATGATAGCGGCAGACGGGTGCGTAACGCGTATGAAACTTACCCTACACAGGAGGATAGCCTTGGGAAACTGAGAGTAACCCTCCATAGTCTTGAGATACCGCATGGTATTTTAAGTAAAACTTCGGTGGTGTAGGATAGTCGTGCGTCCGATTAGCTAGTTGGTGAGGTAATGGCTCACCAAGGCGACGATCGGTAGCTGGTCTGAGAGGATGATCAGCCACACGGGCACTGAGACACGGGCCCG "Bacteria" "Bacteroidetes" "Bacteroidia" "Chitinophagales" NA NA NA
GATGAACGCTGACAGAATGCTTAACACATGCAAGTCTACTTGATCCTTCGGGTGATGGTGGCGGACGGGTGAGTAACGCGTAAAGAACTTGCCTTGCAGTCTGGGACAACGTCTGGAAACGGACGCTAATACCGGATATTATGATTGAATCGCATGATTTGATTATGAAAGCTATATGCGCTGCGAGAGAGCTTTGCGTCCCATTAGTTAGTTGGTGAGGTAACGGCTCACCAAGACGATGATGGGTAGCCGGCCTGAGAGGGTGAACGGCCACAAGGGGACTGAGACACGGCCCTT "Bacteria" "Fusobacteria" "Fusobacteriia" "Fusobacteriales" "Fusobacteriaceae" "Fusobacterium" NA
ATTGAACGCTGGCGGAATGCTTTACACATGCAAGTCGAACGGCAGCACAGGTGCTTGCACCTGGTGGCGAGTGGCGAACGGGTGAGTAATACATCGGAACGTGCCCAGACGTGGGGGATAGCTCGGCGAAAGCCGAATTAATACCGCATACGATCTACGGATGAAAGCGGGGGATCGCAAGACCTCGCGCGTTTGGAGCGGCTGATGGCAGATTAGGTTGTTGGTGGGGTAAAGGCTTACCAAGCCTGCGATCTGTAGCTGGTCTGAGAGGACGACCAGCCACACTGGGACTGAGACACGGCCCAG "Bacteria" "Proteobacteria" "Gammaproteobacteria" "Betaproteobacteriales" "Burkholderiaceae"…
GATGAACGCTGGCGGCGTGCTTAACACATGCAAGTCGAACGGGGATAAGAGGAAACCTAGTGAATCTTATCCCAGTGGCGGACGGGTGAGTAACGCGTGGGCAACCTGCCGCATACCGGGGGATAACACTTAGAAATAGGTGCTAATACCGCATAAGCGCACAGAGCCGCATGGCTTGGTGTGAAAAACTCCGGTGGTATGCGATGGGCCCGCGTCTGATTAGCTTGTTGGCGGGGCAGCGGCCCACCAAGGCGACGATCAGTAGCCGGCCTGAGAGGGTGGACGGCCACATTGGGACTGAGACACGGCCCAG "Bacteria" "Firmicutes" "Clostridia" "Clostridiales" "Lachnospiraceae" "Lachnospirace…
GATGAACGCTGGCGGCGTGCTTAACACATGCAAGTCGAACGAGAATCAGTGGATTGAGGATTCGTCCAAATGAAACTGAGGAAAGTGGCGGACGGGTGAGTAACGCGTGAGCAATCTGCCTTGGAGTGGGGAATAACGGTTGGAAACAGCCGCTAATACCGCATGATGCGTCTGGGAGGCATCTCTCTGGACGCCAAAGATTTATCGCTCTGAGATGAGCTCGCGTCTGATTAGCTGGTTGGCGGGGTAACGGCCCACCAAGGCGACGATCAGTAGCCGGACTGAGAGGTTGGCCGGCCACATTGGGACTGAGACACGGCCCAG "Bacteria" "Firmicutes" "Clostridia" "Clostridiales" "Ruminococcaceae" NA …
GACGAACGCTGGCGGCGTGCTTAACACATGCAAGTCGAACGATGAAGCTGGAGCTTGCTCCGGTGGATTAGTGGCGAACGGGTGAGTAACACGTGAGCAATCTGCCCTTGACTCTGGGATAACTGCGGGAAACTGTAGCTAATACCGGATACTTTCCTTGGTGGGCATCCACTGGGGAAGAAAGAATTTCGGTCAAGGATGAGCTCGCGGCCTATCAGCTAGTTGGTGAGGTAATGGCTCACCAAGGCGACGACGGGTAGCCGGCCTGAGAGGGTGACCGGCCACACTGGAACTGAGACACGGTCCAG "Bacteria" "Actinobacteria" "Actinobacteria" "Micrococcales" "Microbacteriaceae" "Candidat…
GATAAACGCTGGCGGCGCACATAAGACATGCAAGTCGAACGAACTTAACCTTTAGTTTACTATTGGAGCGGTTAGTGGCGGACTGGTGAGTAACACGTAAGCAACTTACCTATCAGAGGGGAACAACAGTTAGAAATGACTGCTAATACCGCATATGCCATGAGTATCACATGATACAAATGGGAAAGGAGCAATCCGCTGATAGATAGGCTTGCGTCTGATTAGATAGTTGGTGGGGTAATGGCCTACCAAGTCAACGATCAGTAGCCGAACTGAGAGGTTGAACGGCCACATTGGGACTGAGATACGGCCCAG "Bacteria" "Firmicutes" "Clostridia" "Clostridiales" "Ruminococcaceae" "Ruminococca…
GATAAATGCTGGCGGCGTGCCTAATACATGCAAGTCGAGCGGTAAGGCTTTCACAGATTATTTGAACGGAAAAGTCCAAGAATTTATATTCTAGGATACTATCTTTCAACGTTTAACTCCCGGCTAGGAGAAAAATGGTTGAATAATGTGTGAAAGTACACGAGCGGCGAACGGCTGAGTAACGCGTAGGAATGTACCCCAAAGTGAGGGATAAGCACCGGAAACGGTGTCTAATACCGCATGTGGTCTAAGGACTAAAGCCTTCGGGCGCTTTGGGAGCAGCCTGCGTAAGATTAGTTTGTTGGTGAGGTAATGGCTCACCAAGACTACGATCTTTAGCTGGTCTGAGAGGATGATCAGCCAGACTGGAACTGAGACACGGTCCAG "Bacteria" …
GACGAACGCTGGCGGCGCGCCTAACACATGCAAGTCGAACGGAGACTGTTCATCGGAAGTTTTCGGATGGAAGAAGGACAGTTTTAGTGGCGGACGGGTGAGTAACACGTGAGCAACCTGCCTTTCAGAGGGGGATAACAGTTGGAAACGACTGCTAATACCGCATGACATTAGGGGAGGGCATCCTCTTCTAATCAAAGGAGCAATCCGCTGAAAGATGGGCTCGCGGCCGATTAGCTAGATGGCGGGGTAGAGGCCCACCATGGCGACGATCGGTAGCCGGACTGAGAGGTTGAACGGCCACATTGGGACTGAGACACGGCCCAG "Bacteria" "Firmicutes" "Clostridia" "Clostridiales" "Ruminococcaceae" …
GATAAACGCTGGCGGCGCACATAAGACATGCAAGTCGAACGGAAGTCGTTGTAATGATGTGGACATGGACAGAGAACTTGTTCGAAGAAAATGAAAATTGACTTACAACAATGGCTTTAGTGGCGGACTGGTGAGTAACGCGTGAGCAACCTGCCTGTTAGAGGGGAATAACAGTGAGAAATCATTGCTAATACCGCATATGCCATAACTATCACATGATAGAAGTGGGAAAGGAGTAATCCGCTAACAGATGGGCTCGCGTCTGATTAGATAGTTGGTGGGGTAACGGCCTACCAAGTCTACGATCAGTAGCCGGACTGAGAGGTTGAACGGCCACATTGGGACTGAGATACGGCCCAG "Bacteria" "Firmicutes" "Clostridia" "…
GACGAACGCTAGCGGCAGGCTTAACACATGCAAGTCGAGGGGCAGCGGGGTGTAGCAATACACTGCCGGCGACCGGCGCACGGGTGCGTAACGCGTATGCAACCTACCCATAACAGGGGCATAACACTGAGAAATTGGTACTAATTCCCCATAACATTCGAAGAGGCATCTCTTTGGGTTGAAAACTCCGGTGGTTATGGATGGGCATGCGTTGTATTAGCTAGTTGGTGAGGTAACGGCTCACCAAGGCGACGATACATAGGGGGACTGAGAGGTTAACCCCCCACATTGGTACTGAGACACGGACCAA "Bacteria" "Bacteroidetes" "Bacteroidia" "Bacteroidales" "Rikenellaceae" "Alistipes" NA
GATAAACGCTGGCGGCGCACATAAGACATGCAAGTCGAACGGAAGTCGTTATAAAACTGATTGAAGATTTATCTGAAAGAAGTTTTGTAACAATGGCTTTAGTGGCGGACTGGTGAGTAACACGTAAGCAACCTACCTATTAGAGGGGGATAACAGTGAGAAATCATTGCTAATACCGCATAAGCTTGTAGTATCGCATGATATAGCAAGAAAAGGAGAAATCCACTAATAGATGGGCTTGCGGCTGATTAGCTAGTTGGTAAGGTAACGGCTTACCAAGGCAACGATCAGTAGCCGGGCTGAGAGGCTCTGCGGCCACATTGGGACTGAGATACGGCCCAG "Bacteria" "Firmicutes" "Clostridia" "Clostridiales" "Ru…
GATGAACGCTGGCGGCGTGCTTAACACATGCAAGTCGAACGGAGATATCATTTTCGAAGCGATTAGTTTACTAAGAGCGGAGATGTTGCTATCTTAGTGGCGGACGGGTGAGTAACGCGTGGGTAACCTGCCTTACACTGGGGGATAACACTTAGAAATAGGTGCTAATACCGCATAACAGGAGAAGATGCATGTCTTTTCCTTAAAAACTCCGGTGGTGTAAGATGGACCCGCGTCTGATTAGCTTGTTGGCGGGGTAACGGCCCACCAAGGCGACGATCAGTAGCCGGCCTGAGAGGGTGAACGGCCACATTGGGACTGAGACACGGCCCAA "Bacteria" "Firmicutes" "Clostridia" "Clostridiales" "Lachnospir…
GATGAACGCTAGCTACAGGCTTAACACATGCAAGTCGAGGGGAAACGACATCGAAAGCTTGCTTTTGATGGGCGTCGACCGGCGCACGGGTGAGTAACGCGTATCCAACCTGCCCACCACTTGGGGATAACCTTGCGAAAGTAAGACTAATACCCAATGACGTCTCTAGAAGACATCTGAAAGAGATTAAAGATTTATCGGTGATGGATGGGGATGCGTCTGATTAGCTTGTTGGCGGGGTAACGGCCCACCAAGGCGACGATCAGTAGGGGTTCTGAGAGGAAGGTCCCCCACATTGGAACTGAGACACGGTCCAA "Bacteria" "Bacteroidetes" "Bacteroidia" "Bacteroidales" "Prevotellaceae" "Prevot…
GATAAACGCTGGCGGCGCACATAAGACATGCAAGTCGAACGGACTTAACCATTTGTTTACATTTGGGGCGGTTAGTGGCGGACTGGTGAGTAACGCGTGAGCAACCTGGCTATTAGAGGGGAATAACAGTGAGAAATCATTGCTAATACCGCATATGCTCACTAGTAGCACATGCTACGGTGAGGAAAGGAGAAATCCGCTAATAGATGGGCTCGCGTCTGATTAGCTAGTTGGTGGGGTAATGGCCTACCAAGGCGACGATCAGTAGCCGGACTGAGAGGTTGAACGGCCACATTGGGACTGAGATACGGCCCAG "Bacteria" "Firmicutes" "Clostridia" "Clostridiales" "Ruminococcaceae" "Ruminococc…
GATAAACGCTGGCGGCGCACATAAGACATGCAAGTCGAACGAACTTAACCTCTTGCTTGCAAGAGGAGCGGTTAGTGGCGGACTGGTGAGTAACACGTAAGAAATCTGCCTATCAGAGGGGAATAACAGTGAGAAATCATTGCTAATACCGCATATGCCATAATTATCGCATGATAATAGTGGGAAAGGAGCAATCCGCTGATAGATGAGCTTGCGTCTGATTAGCTAGTTGGTGGGGTAAAGGCCTACCAAGGCGACGATCAGTAGCCGGACTGAGAGGTTGAACGGCCACATTGGGACTGAGATACGGCCCAG "Bacteria" "Firmicutes" "Clostridia" "Clostridiales" "Ruminococcaceae" "Ruminococca…
ATTGAACGCTGGCGGCAGGCCTAACACATGCAAGTCGAGCGGATGACGGGAGCTTGCTCCTTGATTCAGCGGCGGACGGGTGAGTAATGCCTAGGAATCTGCCTGGTAGTGGGGGACAACGTTCCGAAAGGGGCGCTAATACCGCATACGTCCTACGGGAGAAAGTGGGGGATCTTCGGACCTCACGCTATCAGATGAGCCTAGGTCGGATTAGCTAGTTGGTGAGGTAATGGCTCACCAAGGCGACGATCCGTAACTGGTCTGAGAGGATGATCAGTCACACTGGAACTGAGACACGGTCCAG "Bacteria" "Proteobacteria" "Gammaproteobacteria" "Pseudomonadales" "Pseudomonadaceae" "Pseudo…
GATAAACGCTGGCGGCGCACATAAGACATGCAAGTCGAACGAACTTAATACCTTGCTTGCAAGGTAAGCGGTTAGTGGCGGACTGGTGAGTAACACGTAAGAAATCTGCCTATCAGAGGGGAATAACAGTGAGAAATCACTGCTAATACCGCATATGCCATAACTATCGCATGATAGAAGTGGGAAAGGAGCAATCCGCTGATAGATGAGCTTGCGTCTGATTAGCTAGTTGGTGGGGTAAAGGCCTACCAAGGCGACGATCAGTAGCCGGACTGAGAGGTTGAACGGCCACATTGGGACTGAGATACGGCCCAG "Bacteria" "Firmicutes" "Clostridia" "Clostridiales" "Ruminococcaceae" "Ruminococca…
GATGAACGCTGGCGGCGTGCCTAACACATGCAAGTCGAACGAAGCGCTGTGGCGGAACCCTTCGGGGGAAAGCGGCAGTGACTGAGTGGCGGACGGGTGAGTAACGCGTGGGCAACCTGCCCCGCACTGGGGGACAACAGCTGGAAACGGCTGCTAATACCGCATATGCGCACAGCTTTGCATGAAGCAGTGCGGAAAACTCCGGTGGTGCGGGATGGGCCCGCGTCTGATTAGCTAGTTGGCGGGGCAATGGCCCACCAAGGCGACGATCAGTAGCCGGCCTGAGAGGGTGGACGGCCACATTGGGACTGAGACACGGCCCAG "Bacteria" "Firmicutes" "Clostridia" "Clostridiales" "Lachnospiraceae" "A2…
GACGAACGCTGGCGGCGCGCCTAACACATGCAAGTCGAACGAGCGAGAGAGAGCTTGCTTTCTCGAGCGAGTGGCGAACGGGTGAGTAACGCGTGAGGAACCTGCCTCAAAGAGGGGGACAACAGTTGGAAACGACTGCTAATACCGCATAAGCCCACAGGTCGGCATCGACCAGAGGGAAAAGGAGCAATCCGCTTTGAGATGGCCTCGCGTCCGATTAGCTAGTTGGTGAGGTAACGGCCCACCAAGGCAACGATCGGTAGCCGGACTGAGAGGTTGAACGGCCACATTGGGACTGAGACACGGCCCAG "Bacteria" "Firmicutes" "Clostridia" "Clostridiales" "Ruminococcaceae" "Faecalibacteriu…
GACGAACGCTGGCGGCGTGCTTAACACATGCAAGTCGAACGGAGCACCCTTGAAAGAGTTTTCGGACAATGGAGAGGAATGCTTAGTGGCGGACTGGTGAGTAACGCGTGAGGAACCTGCCTTCCAGAGGGGGACAACAGTTGGAAACGACTGCTAATACCGCATGACACATTTGAATCGCATGGTTTGAATGTCAAAGATTTATCGCTGGAAGATGGCCTCGCGTCTGATTAGCTAGTAGGCGGGGTAACGGCCCACCTAGGCGACGATCAGTAGCCGGACTGAGAGGTTGACCGGCCACATTGGGACTGAGATACGGCCCAG "Bacteria" "Firmicutes" "Clostridia" "Clostridiales" "Ruminococcaceae" "Os…
GACGAACGCTGGCGGCGTGCTTAACACATGCAAGTCGAACGGAGTACCCCTGAAGGAGTTTTCGGACAACGGATGGGAATGCTTAGTGGCGGACTGGTGAGTAACGCGTGAGGAACCTGCCTTCCAGAGGGGGACAACAGTTGGAAACGACTGCTAATACCGCATGATGCGTTGGAGCCGCATGACTCCGACGTCAAAGATTTATCGCTGGAAGATGGCCTCGCGTCTGATTAGCTAGTTGGTGAGGTAACGGCCCACCAAGGCGACGATCAGTAGCCGGACTGAGAGGTTGGCCGGCCACATTGGGACTGAGATACGGCCCAG "Bacteria" "Firmicutes" "Clostridia" "Clostridiales" "Ruminococcaceae" "Os…
GATGAACGCCGGCGGTGTGCCTAATACATGCAAGTCGTACGCACTGGCCCAACTGATTGATGGTGCTTGCACCTGATTGACGATGGATTACCAGTGAGTGGCGGACGGGTGAGTAACACGTAGGTAACCTGCCCCGGAGCGGGGGATAACATTTGGAAACAGATGCTAATACCGCATAACAACAAAAACCACATGGCTTTTGTTTGAAAGATGGCTTTGGCTATCACTCTGGGATGGACCTGCGGTGCATTAGCTAGTTGGTAAGGTAACGGCTTACCAAGGCGATGATGCATAGCCGAGTTGAGAGACTGATCGGCCACAATGGAACTGAGACACGGTCCAT "Bacteria" "Firmicutes" "Bacilli" "Lactobacillales" "La…
GATGAACGCTGGCGGCGTGCTTAACACATGCAAGTCGAACGGAGTGCCTAAGAAAGAGGATTCGTCCAATTGATTAGGTTACTTAGTGGCGGACGGGTGAGTAACGCGTGAGGAACCTGCCTTGGAGTGGGGAATAACAGGTGGAAACATCTGCTAATACCGCATAATATGTCTGTGCCGCATGGTACTGGACATCAAAGATTTATCGCTCTGAGATGGACTCGCGTCTGATTAGCTAGTTGGTGGGGTAACGGCTCACCAAGGCGACGATCAGTAGCCGGACTGAGAGGTTGGCCGGCCACATTGGGACTGAGACACGGCCCAG "Bacteria" "Firmicutes" "Clostridia" "Clostridiales" "Ruminococcaceae" "R…
GACGAACGCTGGCGGCGTGCTTAACACATGCAAGTCGAACGCTGAAGCTTGGTGCTTGCACTGGGTGGATGAGTGGCGAACGGGTGAGTAATACGTGAGTAACCTGCCCTTGACTCTGGGATAAGCCTGGGAAACTGGGTCTAATACTGGATATGACATGTCACCGCATGGTGGTGTGTGGAAAGGGTTTTACTGGTTTTGGATGGGCTCACGGCCTATCAGCTTGTTGGTGGGGTAATGGCTCACCAAGGCGACGACGGGTAGCCGGCCTGAGAGGGTGACCGGCCACACTGGGACTGAGACACGGCCCAG "Bacteria" "Actinobacteria" "Actinobacteria" "Micrococcales" "Micrococcaceae" "Kocuria…
GATGAACGCTGGCGGCGTGCTTAACACATGCAAGTCGAACGGAGCACCCCTGAAGGAGTTTTCGGACAACGGAAGGGGCTGCTTAGTGGCGGACGGGTGAGTAACGCGTGAGGAACCTGCCTTGGAGTGGGGAATAACAGCTGGAAACAGCTGCTAATACCGCATAATATATCTGGGCCGCATGGCTCTGGATATCAAAGATTTATCGCTCTGAGATGGACTCGCGTCTGATTAGCTGGTTGGCGGGGTAACGGCCCACCAAGGCGACGATCAGTAGCCGGACTGAGAGGTTGGCCGGCCACATTGGGACTGAGACACGGCCCAG "Bacteria" "Firmicutes" "Clostridia" "Clostridiales" "Ruminococcaceae" "R…
GATGAACGCTGGCGGCGTGCTTAACACATGCAAGTCGAACGGGGTGCCTTTGAAAGAGGATTCGTCCAATTGAGAAGGTTACCTAGTGGCGGACGGGTGAGTAACGCGTGAGTAACCTGCCTTGGAGTGGGGAATAACACATCGAAAGATGTGCTAATACCGCATAATGCAGTTGGGCCGCATGGCTCTGGCTGCCAAAGATTTATCGCTCTGAGATGGACTCGCGTCTGATTAGCTGGTTGGCGGGGTAACGGCCCACCAAGGCGACGATCAGTAGCCGGACTGAGAGGTTGACCGGCCACATTGGGACTGAGACACGGCCCAG "Bacteria" "Firmicutes" "Clostridia" "Clostridiales" "Ruminococcaceae" "R…
GATTAACGCTTGCGGCATGCCTAAGACATGCAAGTCGAACGAGAAGGCCCATTGACGTAGATTGAAACCGGAGTGCTTGCACAAAGGTGGATTTCTACTGATTTGGATTTTCCTTCTAGTGGCAAACGGGTGAGTAACACGTGGGTTACCTACCTTTAAGTTGGGGATATCACCTGGAAACGGGTAGTAATACCGAATGTGATCTACGGATTAAAGAAGCCTTTAAAGCTTCGCTTAAAGATGGGCCTGCGGTGCATTAGCTAGTTGGTGAGATAAAAGCCCACCAAGGCGACGATGCATAGCCGAACTGAGAGGTTGATCGGCCACACTGGGACTGAGACACGGCCCAG "Bacteria" "Tenericutes" "Mollicutes" "Mollicute…
GATGAACGCTGGCGGCGTGCCTAACACATGCAAGTCGAACGGGCCCATATTGAAACCTAGTGATTTATGGGTTAGTGGCGGACGGGTGAGTAACGCGTGGATAACCTGCCGTATACAGGGGGATAACACTTAGAAATAGGTGCTAATACCGCATAAGCGCACGGTTCCGCATGGAACAGTGTGAAAAACTCCGGTGGTATACGATGGATCCGCGTCTGATTAGCCAGTTGGCGGGGTAACGGCCCACCAAAGCGACGATCAGTAGCCGGCCTGAGAGGGTGAACGGCCACATTGGGACTGAGACACGGCCCAA "Bacteria" "Firmicutes" "Clostridia" "Clostridiales" "Lachnospiraceae" "Lachnospirace…
ATTGAACGCTGGCGGCAGGCCTAACACATGCAAGTCGAGCGGTAGCACAGAGAGCTTGCTCTCGGGTGACGAGCGGCGGACGGGTGAGTAATGTCTGGGAAACTGCCTGATGGAGGGGGATAACTACTGGAAACGGTAGCTAATACCGCATAACGTCGCAAGACCAAAGTGGGGGACCTTCGGGCCTCATGCCATCAGATGTGCCCAGATGGGATTAGCTAGTAGGTGGGGTAATGGCTCACCTAGGCGACGATCCCTAGCTGGTCTGAGAGGATGACCAGCCACACTGGAACTGAGACACGGTCCAG "Bacteria" "Proteobacteria" "Gammaproteobacteria" "Enterobacteriales" "Enterobacteriaceae"…
GATGAACGCTGGCGGCGTGCCTAACACATGCAAGTCGAACGGAGTTGTGCATCGGAAGTTTTCGGATGGAAGAAGCAGAACTTAGTGGCGGACGGGTGAGTAACGCGTGGGTAACCTGCCGTATACAGGGGGATAACAGTTGGAAACAACTGCTAATACCGCATAAGCGCACACTGTCGCATGACAGAGTGTGAAAATTTCCGGAGGTATACGATGGACCCGCGTCTGATTAGCCAGTTGGCAGGGTAACGGCCTACCAAAGCAACGATCAGTAGCCGGCCTGAGAGGGTGGACGGCCACATTGGGACTGAGACACGGCCCAA "Bacteria" "Firmicutes" "Clostridia" "Clostridiales" "Lachnospiraceae" NA NA
GATGAACGCTGGCGGCGTGCTTAACACATGCAAGTCGAACGCGAAAGGGGGCTTCGGCTCCCGAGTAGAGTGGCGCACGGGTGAGTAACGCGTGGATAATCTGCCCTCTTGTTCGGGATAACTGCTGGAAACGGCAGCTAATACCGGATAAGCTCCCCCAATTGTTTGGGGGAGGAAAGGAGGCCTCTTCATGAAAGCTTCCGCGAGGGGATGAGTCCGCGTCCCATTAGCTAGTTGGTGAGGTAACGGCCCACCAAGGCAACGATGGGTAGCCGGTCTAAGAGGATGACCGGCCACACTGGAACTGAAACACGGTCCAG "Bacteria" "Proteobacteria" "Deltaproteobacteria" "Desulfovibrionales" "Desulf…
GATGAACGCTGGCGGCGTGCTTAACACATGCAAGTCGAGCGAAGCATAGATGTGGAAGTTTTCGGATGGAAGCAGATATGACTGAGCGGCGGACGGGTGAGTAACGCGTGGGTAACCTGCCTCATACAGGGGGATAACAGTTAGAAATGACTGCTAATACCGCATAAGCGCACAGGACCGCATGGTCCGGTGTGAAAAACTCCGGTGGTATGAGATGGACCCGCGTCTGATTAGCTGGTTGGTGAGGTAACGGCCCACCAAGGCGACGATCAGTAGCCGACCTGAGAGGGTGGCCGGCCACATTGGGACTGAGACACGGCCCAA "Bacteria" "Firmicutes" "Clostridia" "Clostridiales" "Lachnospiraceae" NA …
GATGAACGCTGGCGGCGTGCTTAACACATGCAAGTCGAACGAAGCAATTTAGCGGAAGTTTTCGGATGGAAGTTAAATTGACTGAGTGGCGGACGGGTGAGTAACGCGTGGGTAACCTGCCTCACACTGGGGGACAACAGTTAGAAATGACTGCTAATACCGCATAAGCGCACAGGACCGCATGGTCCGGTGTGAAAAACTCCGGTGGTGTGAGATGGACCCGCGTTTGATTAGCTAGTTGGTGGGGTAACGGCCTACCAAGGCGACGATCAATAGCCGACCTGAGAGGGTGACCGGCCACATTGGGACTGAGACACGGCCCAA "Bacteria" "Firmicutes" "Clostridia" "Clostridiales" "Lachnospiraceae" "La…
GATGAACGCTGGCGGCGTGCCTAACACATGCAAGTCGAACGGAATTTACATGAAGCCTAGCGATTGTAAATTTAGTGGCGGACGGGTGAGTAACGCGTGGGTAACCTGCCTTGTACTGGGGGACAACAGTTGGAAACGACTGCTAATACCGCATAAGCGCACAGCTTCGCATGAAGCAGTGTGAAAAACTCCGGTGGTACAAGATGGACCCGCGTCTGATTAGCTGGTTGGTGAGGTAACGGCCCACCAAGGCGACGATCAGTAGCCGGCCTGAGAGGGTGAACGGCCACATTGGGACTGAGACACGGCCCAA "Bacteria" "Firmicutes" "Clostridia" "Clostridiales" "Lachnospiraceae" "Lachnospirace…
GATGAACGCTGGCGGCGTGCTTAACACATGCAAGTCGAACGGGAATGCCGCGCTGATGCGATTTCGGTCAAATCATGTGGCATTCGAGTGGCGGACGGGTGAGTAACGCGTGGGTAACCTGCCTTACACAGGGGGATAACACCTGGAAACAGGTGCTAATACCGCATAAGCGCACAGGGCCGCATGGCCCGGTGTGAAAAACTCCGGTGGTGTAAGATGGACCCGCGTCTGATTAGCTTGTTGGCGGGGTAGAGGCCCACCAAGGCGACGATCAGTAGCCGGCCTGAGAGGGTGGACGGCCACATTGGGACTGAGACACGGCCCAA "Bacteria" "Firmicutes" "Clostridia" "Clostridiales" "Lachnospiraceae" "…
GACGAACGCTGGCGGCGTGCTTAACACATGCAAGTCGAACGGAGCACCCCTGAAGGAGTTTTCGGACAACGGATGGGAATGCTTAGTGGCGGACTGGTGAGTAACGCGTGAGGAACCTGCCTTCCAGAGGGGGACAACAGTTGGAAACGACTGCTAATACCGCATGACGCATCGAAGTCGCATGGCTTTGATGCCAAAGATTTATCGCTGGAAGATGGCCTCGCGTCTGATTAGCTAGTTGGTGAGGTAACGGCCCACCAAGGCGACGATCAGTAGCCGGACTGAGAGGTTGGCCGGCCACATTGGGACTGAGATACGGCCCAG "Bacteria" "Firmicutes" "Clostridia" "Clostridiales" "Ruminococcaceae" "Os…
GACGAACGCTGGCGGCGCGCCTAACACATGCAAGTCGAACGAGAGATGAGGAGCTTGCTTCCTCAATCGAGTGGCGAACGGGTGAGTAACGCGTGAGGAACCTGCCTCAAAGAGGGGGACAACAGTTGGAAACGACTGCTAATACCGCATAAGCCCACGGCTCGGCATCGAGCAGAGGGAAAAGGAGCGATCCGCTTTGAGATGGCCTCGCGTCCGATTAGCTAGTTGGTGAGGTAACGGCCCACCAAGGCGACGATCGGTAGCCGGACTGAGAGGTTGAACGGCCACATTGGGACTGAGACACGGCCCAG "Bacteria" "Firmicutes" "Clostridia" "Clostridiales" "Ruminococcaceae" "Faecalibacteriu…
GATGAACGCTAGCGGCAGGCTTAACACATGCAAGTCGAGGGGTATAGTTCTTCGGAGCTAGAGACCGGCGCACGGGTGCGTAACGCGTATGCAATCTACCTTTTACAGAGGGATAGCCCAGAGAAATTTGGATTAATACCTCATAGTATGTGAGAATCGCATGGTTTTCACATTAAAGTTCCAACGGTAAAAGATGAGCATGCGTCCCATTAGCTAGATGGTAAGGTAACGGCTTACCATGGCAACGATGGGTAGGGGTCCTGAGAGGGAGATCCCCCACACTGGTACTGAGACACGGACCAG "Bacteria" "Bacteroidetes" "Bacteroidia" "Flavobacteriales" "Flavobacteriaceae" "Flavobacterium…
ATTGAACGCTGGCGGCATGCTTTACACATGCAAGTCGAACGGTAACAGGGAGCTTGCTCCGCTGACGAGTGGCGAACGGGTGAGTAATATATCGGAACGTACCCAAGAGTGGGGGATAACGTAGCGAAAGTTACGCTAATACCGCATACGATCTAAGGATGAAAGCAGGGGACCTTCGGGCCTTGTGCTCCTGGAGCGGCCGATATCTGATTAGCTAGTTGGTGAGGTAAAGGCTCACCAAGGCGACGATCAGTAGCTGGTCTGAGAGGACGACCAGCCACACTGGAACTGAGACACGGTCCAG "Bacteria" "Proteobacteria" "Gammaproteobacteria" "Betaproteobacteriales" "Burkholderiaceae" "…
GATAAACGCTGGCGGCGCACATAAGACATGCAAGTCGAACGGACTTAACCGAAGTATTTATATTTTGGAGCGGTTAGTGGCGGACTGGTGAGTAACACGTAAGCAACCTGCCTATTAGAGGGGAATAACAGTGAGAAATCATTGCTAATACCGCATATGCTGTGAGTATCGCATGGTACAAACAGGAAAGGAGCAATCCGCTAATAGATGGGCTTGCGTCTGATTAGATAGTTGGTGGGGTAATGGCCTACCAAGTCGACGATCAGTAGCCGAACTGAGAGGTTGAACGGCCACATTGGGACTGAGATACGGCCCAG "Bacteria" "Firmicutes" "Clostridia" "Clostridiales" "Ruminococcaceae" "Ruminococ…
GATAAACGCTGGCGGCGCACATAAGACATGCAAGTCGAACGAACTTAACTCATTCTTTTAGTTTGAGAGCGGTTAGTGGCGGACTGGTGAGTAACGCGTAAGTAACCTGCCTGTTAGAGGGGAATAACAATGAGAAATCATTGCTAATACCGCATATGCCATAATTATCACATGATAATAGTGGGAAAGGAGCAATTCGCTAACAGATGGACTTGCGTCTGATTAGATAGTTGGTGGGGCAACGGCCTACCAAGTCGACGATCAGTAGCCGGACTGAGAGGTTGAACGGCCACATTGGGACTGAGATACGGCCCAG "Bacteria" "Firmicutes" "Clostridia" "Clostridiales" "Ruminococcaceae" "Ruminococc…
GATGAACGCTGGCGGCGTGCTTAACACATGCAAGTCGAGCGAAAATAATTGGGAGCTTGCTTTTGATTATTTTAGCGGCGGACGGGTGAGTAACGTGTGGGTAACCTGCCTTTTACTGGGGAATAATCACTGGAAACGGTGACTAATACCGCATACGGTTCTTGGAAGGCATCTTCTAGGAAAGAAAGGATTTATTCGGTAAAAGATGGGCCCGCATCTGATTAGCTAGTTGGTGAGATAACAGCCCACCAAGGCGACGATCAGTAGCCGACCTGAGAGGGTGACCGGCCACATTGGGACTGAGACACGGCCCAA "Bacteria" "Firmicutes" "Clostridia" "Clostridiales" "Lachnospiraceae" "ASF356" NA
GACGAACGCTGGCGGCGTGCCTAACACATGCAAGTCGAACGAAGTTAAACGCTGATGATTTAGCTTGCTATTGATTCTTGTTTAGCTTAGTGGCGGACGGGTGAGTAACGCGTGAGCAACCTGCCTTTCAGAGGGGGATAACGTTTGGAAACGAACGCTAATACCGCATGATATGATCGAACCGCATGGTTTGATGATCAAAGGAGCAATCCGCTGAAAGATGGGCTCGCGTCCGATTAGGTAGTTGGCGGGGTAACGGCCCACCAAGCCGACGATCGGTAGCCGGACTGAGAGGTTGAACGGCCACATTGGGACTGAGACACGGCCCAG "Bacteria" "Firmicutes" "Clostridia" "Clostridiales" "Ruminococcacea…
GATGAACGCTGGCGGCGTGCTTAATACATGCAAGTCGAACGAAGCACCTCTCCCGTTGATTGAAGTAGCTTGCTACAGATTGAAACAATTGAGGTGACTGAGTGGCGGACGGGTGAGTAACGCGTGGGTAACCTGCCTTGTACAGGGGGATAACAGTTGGAAACGACTGCTAATACCGCATAAGCGCACAGTATCGCATGATACAGTGTGAAAAACTCCGGTGGTACAAGATGGACCCGCGTCTGATTAGCTAGTTGGAGGGGTAACGGCCCACCAAGGCAACGATCAGTAGCCGACTTGAGAGAGTGATCGGCCACATTGGGACTGAGACACGGCCCAA "Bacteria" "Firmicutes" "Clostridia" "Clostridiales" "Lach…
GATGAACGCTGGCGGCGTGCCTAACACATGCAAGTCGAGCGAAGCGCTTAAAATGGATTCTTCGGATGAAGCTTTATGTGACTGAGCGGCGGACGGGTGAGTAACGCGTGGGCAACCTGCCTTACACAGGGGGATAACAGTTAGAAATGACTGCTAATACCGCATAAGACCACAGGACTGCATGGTCCGGTGGTAAAAACTCCGGTGGTGTAAGATGGGCCCGCGTCTGATTAGGTAGTTGGCGGGGTAACGGCCCACCAAGCCGACGATCAGTAGCCGACCTGAGAGGGTGACCGGCCACATTGGGACTGAGACACGGCCCAG "Bacteria" "Firmicutes" "Clostridia" "Clostridiales" "Lachnospiraceae" "La…
ATTGAACGCTGGCGGCAGGCTTAACACATGCAAGTCGAGCGGGGAAAGGTAGCTTGCTACCTGACCTAGCGGCGGACGGGTGAGTAATGCTTAGGAATCTGCCTATTAGTGGGGGACAACATTCCGAAAGGAATGCTAATACCGCATACGCCCTACGGGGGAAAGCAGGGGATCTTCGGACCTTGCGCTAATAGATGAGCCTAAGTCAGATTAGCTAGTTGGTGGGGTAAAGGCCTACCAAGGCGACGATCTGTAGCGGGTCTGAGAGGATGATCCGCCACACTGGGACTGAGACACGGCCCAG "Bacteria" "Proteobacteria" "Gammaproteobacteria" "Pseudomonadales" "Moraxellaceae" "Acinetoba…
GATGAACGCTGGCGGCGTGCCTAACACATGCAAGTCGAACGGACTTATAACGAAACCTGGTGAATTATAAGTTAGTGGCGGACGGGTGAGTAACGCGTGGAAAACCTGCCGTATACTGGGGGATAACACTTAGAAATAGGTGCTAATACCGCATAAGCGCACAGCTTCGCATGAAGCAGTGTGAAAAACTCCGGTGGTATACGATGGTTCCGCGTCTGATTAGCTAGTTGGTGAGGTAAAAGCCCACCAAGGCAACGATCAGTAGCCGGCCTGAGAGGGTGAACGGCCACATTGGGACTGAGACACGGCCCAG "Bacteria" "Firmicutes" "Clostridia" "Clostridiales" "Lachnospiraceae" "Lachnospirace…
GATGAACGCTAGCGGCAGGCCTAACACATGCAAGTCGAGGGGCAGCATAAAACAAGCTTGCTTGTTTGGTGGCGACCGGCGCACGGGTGCGTAACGCGTATGCAACCTACCCTGTACTGAGGGATAGCCCGGAGAAATTCGGATTAACACCTCATAGGATCTTAGATCGGCATCGATTAGAGATTAAAGGTTACGGTACAGGATGGGCATGCGTCCCATTAGCTAGATGGTAAGGTAACGGCTTACCATGGCAACGATGGGTAGGGGGCCTGAGAGGGTGGTCCCCCACACTGGTACTGAGACACGGACCAG "Bacteria" "Bacteroidetes" "Bacteroidia" "Flavobacteriales" "Crocinitomicaceae" "Fluvi…
GATGAACGCTGGCGGCGTGCCTAACACATGCAAGTCGAACGAAGCGATTCAGAGGAAGTTTTCGGATGGAATCTGGAGAGACTGAGTGGCGGACGGGTGAGTAACGCGTGGATAACCTGCCTCATACAGGGGGATAACAGTTAGAAATGACTGCTAATACCGCATAAGCGCACAAGATCGCATGATCATGTGTGAAAAACTCCGGTGGTATGAGATGGATCCGCGTCTGATTAGCCAGTTGGCGGGGTAACGGCCCACCAAAGCGACGATCAGTAGCCGACCTGAGAGGGTGACCGGCCACATTGGGACTGAGACACGGCCCAA "Bacteria" "Firmicutes" "Clostridia" "Clostridiales" "Lachnospiraceae" NA …
AACGAACGCTGGCGGCAGGCTTAACACATGCAAGTCGAACGCACCTTTCGGGGTGAGTGGCAGACGGGTGAGTAACGCGTGGGAATCTACCCTTCTCTACGGGATAGCTCTGGGAAACTGGAATTAATACCGTATACGTCCTGAGGGAGAAAGATTTATCGGGGAAGGATGAGCCCGCGTTGGATTAGCTAGTTGGTGGGGTAAAGGCCTACCAAGGCGACGATCCATAGCTGGTCTAAGAGGATGATCAGCCACATTGGGACTGAGACACGGCCCAA "Bacteria" "Proteobacteria" "Alphaproteobacteria" "Rhizobiales" "Rhizobiaceae" "Aureimonas" "altamirensis"
GACGAACGCTGGCGGCGTGCCTAATACATGCAAGTCGAACGGAGATATACGCGGAAGATTTAGCTTGCTATTGATTCTTGTGTATCTTAGTGGCGGACGGGTGAGTAACGCGTGAGCAACCTGCCTTTCAGAGGGGGATAACGTTTGGAAACGAACGCTAATACCGCATGATATTATCTTATCGCATGATAGGATGATCAAAGGAGTGATCCGCTGAAAGATGGGCTCGCGTCCGATTAGGTAGTTGGTGAGGTAACGGCCCACCAAGCCGACGATCGGTAGCCGGACTGAGAGGTTGGACGGCCACATTGGGACTGAGACACGGCCCAG "Bacteria" "Firmicutes" "Clostridia" "Clostridiales" "Ruminococcacea…
GATGAACGCTAGCGGCAGGCTTAATACATGCAAGTCGAGGGGCAGCATGGGGTAGCAATACTCTGATGGCGACCGGCAAACGTGTGCGGAACACGTACACAACCTTCCTTCGAGTGGGGAATAGCCCAGGGAAACTTGGATTAATACCCCATAATATTTAGGAGCAGCATTGCTCTTTTATTAAAGCCGCAAGGCGCTTGAAGATGGGTGTGCGGCTGATTAGGTAGTTGGCGGGGTAACGGCCCACCAAGCCTGCGATCAGTAACTGGTGTGAGAGCACGACCAGTCACACGGGCACTGAGACACGGGCCCG "Bacteria" "Bacteroidetes" "Bacteroidia" "Chitinophagales" "Chitinophagaceae" NA NA
GATGAACGCTGGCGGCGTGCCTAACACATGCAAGTCGAACGGGGCCGTGCGAGGGGAGGGGAAGGCTTGCCTGACCCGAACCGGACGCGGCCTAGTGGCGGACGGGTGAGTAACGCGTGGGCAATCTGCCCCGTACCGGGGGATAACACCTGGAAACAGGTGCTAACACCGCATGACAGGCGGGGGCGCATGCCCCGGCCTTGAAAACTCCGGTGGTACGGGATGAGCCCGCGTCCGATTAGCCAGTTGGCGGGGTAACGGCCCACCAAAGCGACGATCGGTAGCCGGCCTGAGAGGGTGGACGGCCACATTGGGACTGAGACACGGCCCAA "Bacteria" "Firmicutes" "Clostridia" "Clostridiales" "Lachnospirac…
GATGAACGCTGGCGGCGTGCTTAACACATGCAAGTCGAACGAAGCACTTAAGACGGATTACTTCGGTTTGAAGTCTTATTTGACTGAGTGGCGGACGGGTGAGTAACGCGTGGGTAACCTGCCTCATACAGGGGGATAACAGTTAGAAATGACTGCTAATACCGCATAAGCGCACGGTCTCGCATGGGACGGTGTGAAAAACTCCGGTGGTATGAGATGGACCCGCGTCTGATTAGCTGGTTGGTGAGGTAAGGGCTCACCAAGGCGACGATCAGTAGCCGGCCTGAGAGGGTGAACGGCCACATTGGGACTGAGACACGGCCCAA "Bacteria" "Firmicutes" "Clostridia" "Clostridiales" "Lachnospiraceae" "…
GATGAACGCTGGCGGCGTGCCTAATACATGCAAGTCGAGCGAACCACTTCGGTGGGAAGCGGCGAACGGGTGAGTAACACGTAGGTGATCTGCCCATCAGACGGGGACAACGATTGGAAACGATCGCTAATACCGGATAGGACGAAAGTTTAAAGATGCTTCTGGCATCACTGATGGATGAGCCTGCGGCGCATTAGCTAGTTGGTGGGGTAAAGGCCTACCAAGGCGACGATGCGTAGCCGACCTGAGAGGGTGAACGGCCACACTGGGACTGAGACACGGCCCAG "Bacteria" "Firmicutes" "Erysipelotrichia" "Erysipelotrichales" "Erysipelotrichaceae" "Turicibacter" NA
GATGAACGCTAGCGACAGGCTTAACACATGCAAGTCGAGGGGCAGCGGGGGTGCAGGCTTGCCTGCACCTGCCGGCGACCGGCGCACGGGTGAGTAACACGTATGGAACCTGCCCGCCACAGGGGGATAACCCGGGGAAACCCGGCCTAATACCCCATGCCGCCCGGACCGGGCATCCGGTCCGGGCGAAAGGAGGAATCCGGTGGCGGCTGGGCATGCGGCGCATTAGCTTGACGGCGGGGTAACGGCCCACCGTGGCGACGATGCGTAGGGGTTCTGAGAGGAAGGCCCCCCACACTGGAACTGAGACACGGTCCAG "Bacteria" "Bacteroidetes" "Bacteroidia" "Bacteroidales" "Muribaculaceae" NA NA
GATGAACGCTGGCGGCGTGCTTAACACATGCAAGTCGAGCGAAAATAATTGAGAGCTTGCTTTTGATTATTTTAGCGGCGGACGGGTGAGTAACGTGTGGGTAACCTGCCTTTTACTGGGGAATAATCGTTGGAAACGACGACTAATACCGCATACGGTTCTTGGAAGGCATCTTCTAAGAAAGAAAGGATTTATTCGGTAAAAGATGGGCCCGCATCTGATTAGCTAGTTGGTGAGATAATAGCCCACCAAGGCAACGATCAGTAGCCGACCTGAGAGGGTGACCGGCCACATTGGGACTGAGACACGGCCCAA "Bacteria" "Firmicutes" "Clostridia" "Clostridiales" "Lachnospiraceae" "ASF356" NA
GACGAACGCTGGCGGCGCGCCTAACACATGCAAGTCGAACGAGCGAGAGAGAGCTTGTTTTCTCGAGCGAGTGGCGAACGGGTGAGTAACGCGTGAGGAACCTGCCTCAAAGAGGGGGACAACAGTTGGAAACGACTGCTAATACCGCATAAGCCCACGACCCGGCATCGGGTAGAGGGAAAAGGAGCAATCCGCTTTGAGATGGCCTCGCGTCCGATTAGCTAGTTGGTGAGGTAACGGCTCACCAAGGCGACGATCGGTAGCCGGACTGAGAGGTTGAACGGCCACATTGGGACTGAGACACGGCCCAG "Bacteria" "Firmicutes" "Clostridia" "Clostridiales" "Ruminococcaceae" "Faecalibacteriu…
GATGAACGCTGGCGGCGTGCTTAACACATGCAAGTCGAACGAAGTAGCAATACTTAGTGGCGAACGGGTGAGTAACGCGTGAGCAATCTGCCCATGTCAGGGGGATAACAGTTAGAAATGACTGCTAATACCGCATATGACCACGAGGAGGCATCTCCTTGAGGTGAAAGATTTATCGGACATGGATGAGCTCGCGTCCCATTAGGCAGTTGGCGGGGTAACGGCCCACCAAACCGACGATGGGTAGCCGACCTTAGAGGGTGATCGGCCACATTGGAACTGAGACACGGTCCAA "Bacteria" "Firmicutes" "Clostridia" "Clostridiales" "Clostridiales_vadinBB60_group" NA NA
GATAAACGCTGGCGGCGCACATAAGACATGCAAGTCGAACGGAAGTCGTTGTAATGATATAGACATGGACAGAGAACTTGTTCGAAGAAAGTGAAAGTTGACTTACAACAATGGCTTTAGTGGCGGACTGGTGAGTAACACGTAAGCAACCTGCCTATCAGAGGGGAACAACAGTTAGAAATGACTGCTAATACCGCATATGCCTTAGCAACACATGTTGTAAAAGGGAAAGGAGCAATCCGCTGATAGATGGGCTTGCGTCTGATTAGATAGTTGGTGGGGTAACGGCCTACCAAGTCGACGATCAGTAGCCGGACTGAGAGGTTGAACGGCCACATTGGGACTGAGATACGGCCCAG "Bacteria" "Firmicutes" "Clostridia" "C…
GATAAACGCTGGCGGCGCACATAAGACATGCAAGTCGAACGAACTTAACCATTAGTTTACTATTGGAGCGGTTAGTGGCGGACTGGTGAGTAACACGTAAGCAACCTGCCTATCAGAGGGGAACAACAGTTAGAAATGACTGCTAATACCGCATATGCCTTAGCAACGCATGTTGCAAAAGGGAAAGGAGCAATCCGCTGATAGATGGGCTTGCGTCTGATTAGATAGTTGGTGGGGTAAAGGCCTACCAAGTCGACGATCAGTAGCCGGACTGAGAGGTTGAACGGCCACATTGGGACTGAGATACGGCCCAG "Bacteria" "Firmicutes" "Clostridia" "Clostridiales" "Ruminococcaceae" "Ruminococcac…
AACAAACGCTGGCGGCGTGCCTAATACATGCAAGTCGAACGAGGAAGTACCTTCGGGTATTGTACTAGTGGCGTACGGGTGAGTAACGCGTGGATAATCTGCCTTCAAATGGGGAATAACCAGTCGAAAGATTGGCTAATACCGCATGAGACCACAGGGCCTCCGGGCCTAGGGGTTAAAGGAGCAATTCGTTTGAAGATGAGTCTGCGCCCGATTAGCTAGTTGGTGAGGTAACGGCTCACCAAGGCGACGATCGGTAGCTGGTCTGAGAGGACGGCCAGCCACACTGGGACTGAGACACGGCCCAG "Bacteria" "Proteobacteria" "Deltaproteobacteria" "Bdellovibrionales" "Bdellovibrionaceae"…
GATGAACGCTGGCGGCGTGCTTAACACATGCAAGTCGAACGAAGCACTTGAAGATGATTCTTCGGATGAAACTTCTTGTGACTTAGTGGCGGACGGGTGAGTAACGCGTGGGTAACCTGCCTCACACAGGGGGATAACAGTTAGAAATGACTGCTAATACCGCATAACCCGATAGGATCGCATGATCCAGACGGAAAAGATTTATCGGTGTGAGATGGACCCGCGTCTGATTAGCTAGTTGGTGAGGTAACGGCCCACCAAGGCGACGATCAGTAGCCGGCCTGAGAGGGTGAACGGCCACATTGGGACTGAGACACGGCCCAA "Bacteria" "Firmicutes" "Clostridia" "Clostridiales" "Lachnospiraceae" NA …
ATTGAACGCTGGCGGCATGCTTTACACATGCAAGTCGAACGGTAACAGGGAGCTTGCTCCGCTGACGAGTGGCGAACGGGTGAGTAATATATCGGAACGTACCCAAGAGTGGGGGATAACGTAGCGAAAGTTACGCTAATACCGCATACGATCTATGGATGAAAGCAGGGGACCTTCGGGCCTTGTGCTCCTGGAGCGGCCGATATCTGATTAGCTAGTTGGTGAGGTAAAGGCTCACCAAGGCGACGATCAGTAGCTGGTCTGAGAGGACGACCAGCCACACTGGGACTGAGACACGGCCCAG "Bacteria" "Proteobacteria" "Gammaproteobacteria" "Betaproteobacteriales" "Burkholderiaceae" "…
GATGAACGCTGGCGGCGTGCTTAACACATGCAAGTCGAGCGAAGCGTATCAGCGGAATTTTTCGGAAGGAAGCGGATATGACTTAGCGGCGGACGGGTGAGTAACGCGTGGGTAACCTGCCTCATACAGGGGGATAACAGTTAGAAATGACTGCTAATACCGCATAAGCGCACGGGACTGCATGGTCCAGTGTGAAAAACCGAGGTGGTATGAGATGGACCCGCGTCTGATTAGCTGGTTGGCGGGGTAACGGCCCACCAAGGCGACGATCAGTAGCCGACCTGAGAGGGTGGCCGGCCACATTGGGACTGAGACACGGCCCAA "Bacteria" "Firmicutes" "Clostridia" "Clostridiales" "Lachnospiraceae" NA …
GATGAACGCTGGCGGCGTGCTTAACACATGCAAGTCGAACGGGGGACCCCTGAAGGAGTTTTCGGACAACGGAAGGGAATCCCTAGTGGCGGACGGGTGAGTAACGCGTGAGTAACCTGCCTTGGAGTGGGGAATAACAGCTGGAAACAGCTGCTAATACCGCATAAAACGTCTGTGTCGCATGGCACTGGACGTCAAAGATTTATCGCTCTGAGATGGACTCGCGTCTGATTAGCTAGTTGGTGGGGCAACGGCCCACCAAGGCGACGATCAGTAGCCGGACTGAGAGGTTGGCCGGCCACATTGGGACTGAGACACGGCCCAG "Bacteria" "Firmicutes" "Clostridia" "Clostridiales" "Ruminococcaceae" "R…
GACGAACGCTGGCGGTATGCTTAACACATGCAAGTCGAACGGGGTCCACAGCTTGCTGGGGACCTAGTGGCGAACGGGTGAGTAACACGTGAGCAACCTGCCCTATACAACGGGATACCTACGGGAAACTGTAGTTAATACGGTATAAGACCACGCAGTCGCATGGCTGAGGGGTAAAAGGAGAAATCCGGTATAGGATGGGCTCGCGGCGCATTAGCTAGTTGGTGAGGTAACGGCTCACCAAGGCGACGATGCGTAGCCGACCTGAGAGGGTGGACGGCCACACTGGGACTGAGATACGGCCCAG "Bacteria" "Firmicutes" "Clostridia" "Clostridiales" "Clostridiales_vadinBB60_group" NA NA
GATAAACGCTGGCGGCGCACATAAGACATGCAAGTCGAACGGAAGTCGTTGTAATGATGTGGACATGGACAGAGAACTTGTTCGAAGAAAATGAAAATTGACTTACAACAATGGCTTTAGTGGCGGACTGGTGAGTAACGCGTGAGCAACCTGCCTGTTAGAGGGGAATAACAGTGAGAAATCATTGCTAATACCGCATATGCCATAGTTACCACATGGTAACAGTGGGAAAGGAGTAATCCGCTAACAGATGGGCTCGCGTCTGATTAGATAGTTGGTGGGGTAACGGCCTACCAAGTCGACGATCAGTAGCCGGACTGAGAGGTTGAACGGCCACATTGGGACTGAGATACGGCCCAG "Bacteria" "Firmicutes" "Clostridia" "…
GACGAACGCTGGCGGCGTGCTTAACACATGCAAGTCGAACGGAGCACCCTTGACTGAGGTTTCGGCCAAATGATAGGAATGCTTAGTGGCGGACTGGTGAGTAACGCGTGAGGAACCTGCCTTCCAGAGGGGGACAACAGTTGGAAACGACTGCTAATACCGCATGACGCATGACCGGGGCATCCCGGGCATGTCAAAGATTTTATCGCTGGAAGATGGCCTCGCGTCTGATTAGCTGGTTGGAGGGGTAACGGCCCACCAAGGCGACGATCAGTAGCCGGTCTGAGAGGATGAACGGCCACACTGGAACTGAGACACGGTCCAG "Bacteria" "Firmicutes" "Clostridia" "Clostridiales" "Ruminococcaceae" "O…
GATGAATGCTGGCGGCGTGCCTAATACATGCAAGTCGAGCGGTAACGGGGCTTCACCGTTCTCTTGTCGCACTTGGCCTTTGAGCAAGTGGTCTGATACGAGGGAACAGTGAAGCTGCCGACGAGCGGCGGACGGCTGAGTAACGCGTGGGAACATACCCCAAACTGAGGGATAACTACTCGAAAGAGTGGCTAATACCGCATATGATCTTCGGATTAAAGGATTTATCCGGTTTGGGAATGGCCTGCGTACGATTAGATAGTTGGTGAGGTAAAGGCTCACCAAGTCGACGATCGTTAGATGGTTTGAGAGGATGATCATCCAGACTGGGACTGAGACACGGCCCAG "Bacteria" "Patescibacteria" "Saccharimonadia" "Sa…
GATGAACGCTGGCGGCGTGCTTAACACATGCAAGTCGAGCGAAGCATAAGAGAGGAAGTTTTAAATGGAATCGATTGTGACTGAGCGGCGGACGGGTGAGTAACGCGTGGGGAACCTGCCCTATACAGGGGGATAACAGTTAGAAATGACTGCTAATACCGCATAAGCGCACGGAGCCGCATGGCGCTGTGTGAAAAACGATAGTGGTATAGGAGGGACCCGCGTCTGATTAGGTAGTTGGTGGGGTAACGGCCCACCAAGCCGACGATCAGTAGCCGACCTGAGAGGGTGACCGGCCACATTGGGACTGAGACACGGCCCAA "Bacteria" "Firmicutes" "Clostridia" "Clostridiales" "Lachnospiraceae" NA NA
GATGAACGCTGGCGGCGTGCCTAACACATGCAAGTCGAACGGAGTCGTTTTGGAAATCTCTTCGGAGATGGAATTCTCGACTTAGTGGCGGACGGGTGAGTAACGCGTGAGCAATCTGCCTTTAAGAGGGGGATAACAGTCGGAAACGGCTGCTAATACCGCATAAAGCATTGAAACCGCATGATTTTGATGCCAAAGGAGCAATCCGCTTTTAGATGAGCTCGCGTCTGATTAGCTGGTTGGCGGGGTAACGGCCCACCAAGGCGACGATCAGTAGCCGGACTGAGAGGTTGAACGGCCACATTGGGACTGAGACACGGCCCAG "Bacteria" "Firmicutes" "Clostridia" "Clostridiales" "Ruminococcaceae" "B…
GATGAACGCTAGCTACAGGCTTAACACATGCAAGTCGAGGGGCAGCATGACTTAGCAATAGGTTGATGGCGACCGGCGCACGGGTGAGTAACACGTATCCAACCTGCCGATTATTCCGGGATAGCCTTTCGAAAGAAAGATTAATACCGGATAGCATAACGAGAAGGCATCTTCTTGTTATTAAAGAATTTCGATAATCGATGGGGATGCGTTCCATTAGTTTGTTGGCGGGGTAACGGCCCACCAAGACATCGATGGATAGGGGTTCTGAGAGGAAGGTCCCCCACATTGGAACTGAGACACGGTCCAA "Bacteria" "Bacteroidetes" "Bacteroidia" "Bacteroidales" "Bacteroidaceae" "Bacteroides" …
GACGAACGCTGGCGGCGTGCCTAACACATGCAAGTCGAACGGAGATACCCGCTGATGAAGTACTTCGGTAATGATTCTTGGATATCTTAGTGGCGGACGGGTGAGTAACGCGTGAGCAACCTGCCTTTCAGAGGGGGATAACGTTTGGAAACGAACGCTAATACCGCATGATATTATTGAGCTGCATGGCTTGATAATCAAAGGAGTAATCCGCTGAAAGATGGGCTCGCGTCCGATTAGGTAGTTGGCGGGGCAACGGCCCACCAAGCCGACGATCGGTAGCCGGACTGAGAGGTTGAACGGCCACATTGGGACTGAGACACGGCCCAG "Bacteria" "Firmicutes" "Clostridia" "Clostridiales" "Ruminococcacea…
GACGAACGCTGGCGGCGTGCTTAACACATGCAAGTCGAGCGGACGTAGCAATACGTTAGCGGCGGACGGGTGAGTAACGCGTGAGCAACCTGCCTTTATCAGGGGGATAACACTTAGAAATAGGTGCTAATACCGCATAAGACCACAGTCGGGCATCCGACAGGGGTAAAAGCATATACGGATAAAGATGGGCTCGCGTCCCATTAGCTAGTTGGTAGGGTAACGGCCTACCAAGGCGACGATGGGTAGCCGACCTGAGAGGGTGATCGGCCACATTGGAACTGAGAAACGGTCCAA "Bacteria" "Firmicutes" "Clostridia" "Clostridiales" "Clostridiales_vadinBB60_group" NA NA
GATGAACGCTGGCGGCGTGCCTAACACATGCAAGTCGAACGAAGCTCCCTGCACGAATTCTTCGGGAGGAGTGTGGGGAAGCTTAGTGGCGGACGGGTGAGTAACGCGTGGGCAACCTGCCCCATACAGGGGGATAACAGCCGGAAACGGCTGCTAATACCGCATAAGCGCACAGCGCCGCATGGCGGGGTGTGAAAAACTCCGGTGGTATGGGATGGGCCCGCGTCTGATTAGCCGGTTGGCGGGGTAACGGCCCACCAAAGCAACGATCAGTAGCCGGCCTGAGAGGGTGGACGGCCACATTGGGACTGAGAGACGGCCCAG "Bacteria" "Firmicutes" "Clostridia" "Clostridiales" "Lachnospiraceae" NA …
GATAAACGCTGGCGGCGCACATAAGACATGCAAGTCGAACGGACTTAACCATTAGTTTACTATTGGAGCGGTTAGTGGCGGACTGGTGAGTAACACGTAAGCAACCTGCCTATCAGAGGGGAACAACAGTTAGAAATGACTGCTAATACCGCATATGCCTAAGTATCACATGATACAATAGGGAAAGGAGCAATCCGCTGATAGATGGGCTTGCGTCTGATTAGCTAGTTGGTGGGGTAATGGCCTACCAAGGCAACGATCAGTAGCCGGACTGAGAGGTTGAACGGCCACATTGGGACTGAGATACGGCCCAG "Bacteria" "Firmicutes" "Clostridia" "Clostridiales" "Ruminococcaceae" "Ruminococcac…
GATGAACGCTGGCGGCGTGCTTAACACATGCAAGTCGAACGGAGATATCATTTTCGAAGCGATTAGTTTACTAAGAGTAGAGATGTTGATATCTTAGTGGCGGACGGGTGAGTAACGCGTGGGTAACCTGCCTTACACTGGGGGATAACACTTAGAAATAGGTGCTAATACCGCATAATAGGAGAAGACGCATGTCTTATCCTTGAAAACTCCGGTGGTGTAAGATGGACCCGCGTCTGATTAGCCAGTTGGCGGGGTAACGGCCCACCAAAGCGACGATCAGTAGCCGACCTGAGAGGGTGAACGGCCACATTGGGACTGAGACACGGCCCAA "Bacteria" "Firmicutes" "Clostridia" "Clostridiales" "Lachnospir…
GATGAACGCTGGCGGCGTGCTTAATACATGCAAGTCGAACGAAGCACCTCTCCCGTTGATTGACCTAGCTTGCTAGAGATTGAAACAATTGAGGTGACTGAGTGGCGGACGGGTGAGTAACGCGTGGGTAACCTGCCTTGTACAGGGGGATAACAGTTGGAAACGACTGCTAATACCGCATAAGCGCACAGTATCGCATGATACAGTGTGAAAAACTCCGGTGGTACAAGATGGACCCGCGTCTGATTAGCTAGTTGGAGGGGTAACGGCCCACCAAGGCAACGATCAGTAGCCGACTTGAGAGAGTGATCGGCCACATTGGGACTGAGACACGGCCCAA "Bacteria" "Firmicutes" "Clostridia" "Clostridiales" "Lach…
GACGAACGCTGGCGGCATGCCTAACACATGCAAGTCGAACGGAGTTACTGAAGGAAATCTTTCGGGATGGAAAACAGGAAGCTTAGTGGCGGACGGGTGAGTAACGCGTGGGTAACGTGCCTTATAGTGGGGAATAACAGTGAGAAATCACTGCTAATACCGCATAGACTCTACTAATCGCATGATTAAAAGAGGAAAGACGGCCTCTCGAAGAAGCTGTTGCTAGAAGAGCGACCCGCGTCTGATTAGCTAGTTGGTGAGGTAAAGGCTCACCAAGGCGACGATCAGTAGCCGGCCTGAGAGGGTGAACGGCCACATTGGGACTGAGACACGGCCCAA "Bacteria" "Firmicutes" "Clostridia" "Clostridiales" NA NA …
GATAAACGCTGGCGGCGCACATAAGACATGCAAGTCGAACGGAAGTCGTTGTAATGATATGGACATGGACAGAGAACTTGTTCGAAGAAAATGAAAATTGACTTACAACAATGGCTTTAGTGGCGGACTGGTGAGTAACGCGTGAGCAACCTGCCTGTTAGAGGGGAATAACAGTGAGAAATCATTGCTAATACCGCATATGCCATAGTTACCACATGGTAACAGTGGGAAAGGAGTAATCCGCTAACAGATGGGCTCGCGTCTGATTAGATAGTTGGTGGGGTAACGGCCTACCAAGTCGACGATCAGTAGCCGGACTGAGAGGTTGAACGGCCACATTGGGACTGAGATACGGCCCAG "Bacteria" "Firmicutes" "Clostridia" "…
GATGAACGCTAGCGACAGGCTTAACACATGCAAGTCGAGGGGCAGCGGGGAGCAAGCTTGCTTGCTCTGCCGGCGACCGGCGCACGGGTGAGTAACACGTATGCAACCTGCCCTCCGCAGGGGGATAACCCGGAGAAATCCGGACTAATACCGCGTGGTACACCGGTGGGGCATCCCACGGGTGTTAAAAGGAAGTGATTCCGGCGGAGGATGGGCATGCGGCGCATTAGCTAGTTGGCGGGGTAACGGCCCACCAAGGCGACGATGCGTAGGGGTTCTGAGAGGAAGGTCCCCCACACTGGTACTGAGACACGGACCAG "Bacteria" "Bacteroidetes" "Bacteroidia" "Bacteroidales" "Muribaculaceae" NA NA
GATGAACGCTGGCGGCATGCCTAAGACATGCAAGTCGAACGCGAGGGCCCATTGATATTAAAGGAAGTGGAAAGTGCTTGCACTCGAAATGGAATTTATTTGATTTGGATTTTCCCTCGAGTGGCAAACGGGTGAGTAACACGTGGGTTACCTACCTCTATGTTGGGGATAACAGTTGGAAACGGCTGCTAATACCGAATGTGCTCTTTGGAGTAAAGAAGCCTTTAAAGCTTCGCGTAGAGATGGGCCTGCGGCGCATTAGCTAGTTGGTGGGGTAATGGCCTACCAAGGCAACGATGCGTAGCCGAGCTGAGAGGTTGATCGGCCACACTGGGACTGAGACACGGCCCAG "Bacteria" "Tenericutes" "Mollicutes" "Mollicu…
GATGAACGCTAGCGGCAGGCTTAACACATGCAAGTCGAGGGGTATAGTTCTTCGGAACTAGAGACCGGCGCACGGGTGCGTAACGCGTATGCAATCTACCTTTTACAGAGGGATAGCCCAGAGAAATTTGGATTAATACCTCATAGTATGTGAGAATCGCATGGTTTTCACATTAAAGTTCCAACGGTAAAAGATGAGCATGCGTCCCATTAGCTAGATGGTAAGGTAACGGCTTACCATGGCGACGATGGGTAGGGGTCCTGAGAGGGAGATCCCCCACACTGGTACTGAGACACGGACCAG "Bacteria" "Bacteroidetes" "Bacteroidia" "Flavobacteriales" "Flavobacteriaceae" "Flavobacterium…
GACGAACGCTGGCGGCGTGCTTAACACATGCAAGTCGAACGGAGTGCCCATGAAAGAGATTTCGGTCAATGGAGTGGGTTACTTAGTGGCGGACGGGTGAGTAACGCGTGAGGAACCTACCTTTCAGAGGGGGACAACAGTTGGAAACGACTGCTAATACCGCATAATATATTGTTGCCGCATGGCAATGATATCAAAGATTTATCGCTGAAAGATGGCCTCGCGTCTGATTAGCTAGTTGGTAGGGTAACGGCCTACCAAGGCGACGATCAGTAGCCGGACTGAGAGGTTGGCCGGCCACATTGGGACTGAGATACGGCCCAG "Bacteria" "Firmicutes" "Clostridia" "Clostridiales" "Ruminococcaceae" "Ru…
GATGAACGCTGGCGGCGTGCTTAACACATGCAAGTCGAGCGAAAATAATTGAGAGCTTGCTTTTAATTATTTTAGCGGCGGACGGGTGAGTAACGTGTGGGCAACCTGCCTTTTACTGGGGAATAATCACTGGAAACGGTGACTAATACCGCATAATATTCTTAGGAGGCATCTTCTGAGAAGGAAAGGAGAAATTCGGTAAAAGATGGGCCCGCATCTGATTAGCTAGTTGGTGAGATAACAGCCCACCAAGGCGACGATCAGTAGCCGACCTGAGAGGGTGACCGGCCACATTGGGACTGAGACACGGCCCAA "Bacteria" "Firmicutes" "Clostridia" "Clostridiales" "Lachnospiraceae" "ASF356" NA
GATGAACGCTGGCGGCGTGCTTAACACATGCAAGTCGAACGAAGCACTGGAGAACGAATCTTCGGAGGAAGTCTCCTTTGACTGAGTGGCGGACGGGTGAGTAACGCGTGGGTAACCTGCCTCACACAGGGGGATAACAGTTGGAAACGACCGCTAATACCGCATAAGCCGGAAGGATCGCATGATCCGGCCGGAAAAGATTTATCGGTGTGAGATGGACCCGCGTCTGATTAGCCAGTTGGCAGGGTAACGGCCTACCAAAGCGACGATCAGTAGCCGGCCTGAGAGGGTGAACGGCCACATTGGGACTGAGACACGGCCCAA "Bacteria" "Firmicutes" "Clostridia" "Clostridiales" "Lachnospiraceae" NA …
GATGAACGCTGGCGGCGTGCTTAACACATGCAAGTCGAACGGGGATGCTTATGGAAGGGGTGCTTGCACTCTGGAAGTAAGGATCTTAGTGGCGGACGGGTGAGTAACGCGTGGGTAACCTGCCCCATACCGGGGGATACCACCTGGAAACAGGTGCTAATACCGCATAAGCGCACGGGAGCGCATGCTCCTGTGTGAAAAACTCCGGTGGTATGGGATGGACCCGCGTCTGATTAGCCAGTTGGCAGGGTAACGGCCTACCAAAGCGACGATCAGTAGCCGGCCTGAGAGGGTGGACGGCCACATTGGGACTGAGACACGGCCCAA "Bacteria" "Firmicutes" "Clostridia" "Clostridiales" "Lachnospiraceae" …
GACGAACGCTGGCGGCGTGCTTAACACATGCAAGTCGAACGGTAAGGCTCCAGCTTGCTGGGGTACACGAGTGGCGAACGGGTGAGTAACACGTGGGTGACCTGCCCTGCACTTCGGGATAAGCCTGGGAAACTGGGTCTAATACCGGATAGGACCGCACCGTGAGGGTGTGGTGGAAAGTTTTTTCGGTGTGGGATGGGCCCGCGGCCTATCAGCTTGTTGGTGGGGTAATGGCCTACCAAGGCGGCGACGGGTAGCCGGCCTGAGAGGGTGGACGGCCACATTGGGACTGAGACACGGCCCAG "Bacteria" "Actinobacteria" "Actinobacteria" "Corynebacteriales" "Corynebacteriaceae" "Coryne…
GACGAACGCTGGCGGCGTGCCTAACACATGCAAGTCGAACGGGGCGAAGGGAGCTTGCTCCCCGAGCCTAGTGGCGGACGGGTGAGTAACGCGTGAGTAACCTGCCTTTCAGAGGGGGATAACATCCTGAAAAGGATGCTAATACCGCATAATATCTTTTTACCGCATGGTAGAGAGATCAAAGGAGCAATCCGCTGAAAGATGGACTCGCGTCCGATTAGCCAGTTGGCGGGGTAACGGCCCACCAAAGCGACGATCGGTAGCCGGACTGAGAGGTTGAACGGCCACATTGGGACTGAGACACGGCCCAG "Bacteria" "Firmicutes" "Clostridia" "Clostridiales" "Ruminococcaceae" "Ruminiclostridi…
GATGAACGCTGGCGGCATGCCTAACACATGCAAGTCGAACGGGGTTTATATAACGGAACTCTCCGGAGGGAAGATATATAAACCTAGTGGCGGACGGGTGAGTAACGCGTGGGCAACCTGCCCTGTACCGGGGGACAACAGCCAGAAATGGCTGCTAATACCGCATAAGCCTGCTGTGCCGCATGGCACAGCAGGGAAAACCACGGTGGTACAGGATGGGCCCGCGTCTGATTAGTTAGTTGGCAGGGTAACGGCCTACCAAGACAACGATCAGTAGCCGGCTTGAGAGAGTGGACGGCCACATTGGGACTGAGACACGGCCCAG "Bacteria" "Firmicutes" "Clostridia" "Clostridiales" "Lachnospiraceae" "L…
GATAAACGCTGGCGGCGCACATAAGACATGCAAGTCGAACGAAGATCGTTATAAAAAGGATTGAAGATTTATCGGATTGAGATTTTATAACAATGGTCTTAGTGGCGGACTGGTGAGTAACGCGTAAGGAACCTGCCTTTTAGAGGGGAATAACAATGAGAAATCATTGCTAATACCGCATATGCCATAGTTATCACATGATAATAGTGGGAAAGGAGCAATTCGCTAAAAGATGGCCTTGCGTCTGATTAGATAGTTGGTAAGGTAACGGCTTACCAAGTCGACGATCAGTAGCCGGACTGAGAGGTTGAACGGCCACATTGGGACTGAGATACGGCCCAG "Bacteria" "Firmicutes" "Clostridia" "Clostridiales" "Ru…
GATGAACGCTGGCGGCGTGCTTAACACATGCAAGTCGAACGGAGATATCATTTTCGAAGCGATTAGTTTACTAAGAGTGGAGATGTTGGTATCTTAGTGGCGGACGGGTGAGTAACGCGTGGGTAACCTGCCTTACACTGGGGGATAACACTTAGAAATAGGTGCTAATACCGCATAACAGTAAGAGACGCATGTCTTTTACTTGAAAATTCCGGTGGTGTAAGATGGACCCGCGTCTGATTAGCTTGTTGGCGGGGTAACGGCCCACCAAGGCAACGATCAGTAGCCGGCCTGAGAGGGTGAACGGCCACATTGGGACTGAGACACGGCCCAA "Bacteria" "Firmicutes" "Clostridia" "Clostridiales" "Lachnospir…
GATGAACGCTGGCGGCACGCTTAACACATGCAAGTCGAGCGGAGATGTGAGTTGGAAGGGCTACGGCCTGGAAGAAGCAGATCTTAGCGGCGGACGGGTGAGGAACGCGTGGGTAACCTGCCCTATACAGGGGGATAACGTGTAGAAATGCACGCTAAAACCGCATAAGCTACATTGGTCGCATGACGAAGGTGGAAAAACTGAGGTGGTATAGGATGGGCCCGCGTCTGATTAGCTAGTTGGAGAGGTAAAGGCTCACCAAGGCGACGATCAGTAGCCGGTCTGAGAGGATGGACGGCCACATTGGGACTGAGATACGGCCCAG "Bacteria" "Firmicutes" "Clostridia" "Clostridiales" NA NA NA
GATAAACGCTGGCGGCGCACATAAGACATGCAAGTCGAACGGAAGTCGTTGTAATGATATAGACATGGACAGAGAACTTGTTCGAAGAAAGTGAAAGTTGACTTACAACAATGGCTTTAGTGGCGGACTGGTGAGTAACACGTAAGCAACCTGCCTATCAGAGGGGAACAACAGTTAGAAATGACTGCTAATACCGCATATGCCTAAGTACCACATGGTACAATAGGGAAAGGAGAAATCCGCTGATAGATGGGCTTGCGTCTGATTAGATAGTTGGTGGGGTAACGGCCTACCAAGTCGACGATCAGTAGCCGGACTGAGAGGTTGAACGGCCACATTGGGACTGAGATACGGCCCAG "Bacteria" "Firmicutes" "Clostridia" "C…
GACGAACGCTGGCGGCGCGCCTAACACATGCAAGTCGAACGGGACCATTTTAGAGTTTACTTTGAGATGGTTTAGTGGCGGACGGGTGAGTAACACGTGAGCAACCTACCTTTCAGAGGGGGATAACAGTTGGAAACGACTGCTAATACCGCATAACGTTGTAAAAGGGCATCCATTTACAACCAAAAGAGAAATCTGCTGAAAGATGGGCTCGCGGCCGATTAGATAGTAGGCGGGGTAACGGCCCACCTAGTCAACGATCGGTAGCCGGACTGAGAGGTTGAACGGCCACATTGGGACTGAGACACGGCCCAG "Bacteria" "Firmicutes" "Clostridia" "Clostridiales" "Ruminococcaceae" "Anaerotrunc…
GATGAACGCTGGCGGCGTGCCTAACACATGCAAGTCGAACGGGTGTACGGGAAGGAAGATTTCGGTCGGAAGCCCCGTGCATGAGTGGCGGACGGGTGAGTAACGCGTGGGCAACCTGCCCTGTACAGGGGGACAACACTTAGAAATAGGTGCTAATACCGCATAACGGGGGGAGCCGCATGGCTTTCCCCTGAAAACTCCGGTGGTACAGGATGGGCCCGCGTCTGATTAGCTGGTTGGCAGGGTAACGGCCTACCAAGGCGACGATCAGTAGCCGGCCTGAGAGGGCGGACGGCCACACTGGGACTGAGACACGGCCCAG "Bacteria" "Firmicutes" "Clostridia" "Clostridiales" "Lachnospiraceae" "Lach…
GATGAACGCTGGCGGCGTGCCTAACACATGCAAGTCGAACGAAGCATCCCTTCCGATGAATGGACCAGCTTGCTGGGAAAGGAATCAATTGGGATGACTGAGTGGCGGACGGGTGAGTAACGCGTGGGTAACCTGCCCCATAGAGGGGGACAACAGCTGGAAACGGCTGCTAATACCGCATAGCAGGGAAGAGACGCATGTCTTTTCCTTCAAAGATTTATCGCTATGGGATGGACCCGCGTCTGATTAGCTGGTTGGTAGGGTAACGGCCTACCAAGGCGACGATCAGTAGCCGGCTTGAGAGAGTGGACGGCCACATTGGGACTGAGACACGGCCCAG "Bacteria" "Firmicutes" "Clostridia" "Clostridiales" "Lach…
GATAAACGCTGGTGGCGCACATAAGACATGCAAGTCGAACGAACTTAACCCTTGCTTGCAAGGGAGCGGTTAGTGGCGGACTGGTGAGTAACACGTAAGAAATCTGCCTATCAGAGGGGAATAACAGTGAGAAATCACTGCTAATACCGCATATGCCATAGGGTTCGCATGAACCTAGTGGGAAAGGAGCAATCCGCTGATAGATGAGCTTGCGTCTGATTAGCTAGTTGGTGGGGTAAAGGCCTACCAAGGCGACGATCAGTAGCCGGACTGAGAGGTTGAACGGCCACATTGGGACTGAGATACGGCCCAG "Bacteria" "Firmicutes" "Clostridia" "Clostridiales" "Ruminococcaceae" "Ruminococcace…
GATGAACGCTGGCGGCGTGCCTAACACATGCAAGTCGAACGAAGACTGTGCGGCGGAACTCTCCGGAGGGAAGACGCGCAGGACTGAGTGGCGGACGGGTGAGTAACGCGTGGGTAACCTGCCCTGTACAGGGGGACAACAGCTGGAAACGGCTGCTAATACCGCATAAGCCTACAGTACCGCATGGTACAGCAGGAAAAACTCCGGTGGTACAGGATGGGCCCGCGTCTGATTAGTTAGTTGGCAGGGTAACGGCCTACCAAGACAACGATCAGTAGCCGGCTTGAGAGAGTGGACGGCCACATTGGGACTGAGACACGGCCCAA "Bacteria" "Firmicutes" "Clostridia" "Clostridiales" "Lachnospiraceae" "…
GATGAACGCTGGCGGCGTGCTTAACACATGCAAGTCGAATGTAGTTTACTACATGGCGGACGGGTGAGTAACGCGTGAGCAATCTGCCTATATCTGGGGGATAACAGTTGGAAACGACTGATAATACCGCATAACATCATTTGAAGGCATCTTCTTATGATCAAAGATTTATCGGATATGGATGAGCTCGCGTCTGATTAGCTTGTTGGTGAGGTAACGGCTCACCAAGGCGACGATCAGTAGCCGACCTGAGAGGGTGATCGGCCACATTGGAACTGAGACACGGTCCAA "Bacteria" "Firmicutes" "Clostridia" "Clostridiales" "Clostridiales_vadinBB60_group" NA NA
GATGAACGCTGGCGGCGTGCCTAACACATGCAAGTCGAGCGGAGATTATTAAGAGCTTGCTTTTAATAATTTTAGCGGCGGACGGGTGAGGAACACGTGGGCAACCTGCCCTTTGCAGAGGGATAACATCAAGAAATTGGTGCTAATACCTCATAAGCTCACACCATGGCATCATGGAGGGAGAAAAGATATATCGGCAGAGGAGGGGCCCGCGGCTGATTAGCTAGTTGGGGAGGTAACGGCTCACCAAGGCGACGATCAGTAGCCGACCTAAGAGGGTGATCGGCCACATTGGAACTGAGACACGGTCCAA "Bacteria" "Firmicutes" "Clostridia" "Clostridiales" "Lachnospiraceae" "Tyzzerella_3"…
GATGAACGCTGGCGGCGTGCCTAACACATGCAAGTCGAGCGGAGCGGTCTTGATGAAGTTTTCGGATGGAATCAGGATTGACTTAGCGGCGGACGGGTGAGTAACACGTGGATAACCTGCCTTATACTGGGGGATAACAGCCAGAAATGGCTGCTAATACCGCATAAGCGCACGGCGCCGCATGGCGCAGTGTGAAAAACTCCGGTGGTATAAGATGGATCCGCGCCTGATTAGCTAGTTGGCGGGGCAGCGGCCCACCAAGGCGACGATCAGTAGCCGGCCTGAGAGGGCGACCGGCCACATTGGGACTGAGACACGGCCCAA "Bacteria" "Firmicutes" "Clostridia" "Clostridiales" "Lachnospiraceae" NA …
GATGAACGCTAGCTACAGGCTTAACACATGCAAGTCGAGGGGCAGCATGGTCTTAGCTTGCTAAGGCCGATGGCGACCGGCGCACGGGTGAGTAACGCGTGGGTAACCTGCCTCATACAGGGGGATAACAGTTAGAAATGACTGCTAATACCGCATAAGCCCACGGTGCCGCATGGCACAGAGGGAAAAGGAGTAATCCGCTTTGAGATGGCCTCGCGTCCGATTAGCTAGTTGGTGAGGTAATGGCCCACCAAGGCGACGATCGGTAGCCGGACTGAGAGGTTGAACGGCCACATTGGGACTGAGACACGGCCCAG "Bacteria" "Firmicutes" "Clostridia" "Clostridiales" "Lachnospiraceae" NA NA
AACGAACGCTGGCGGCAGGCCTAACACATGCAAGTCGAGCGCGCCCTTCGGGGTGAGCGGCGGACGGGTGAGTAACGCGTGGGAACGTGCCCTTCTCTGCGGAATAGCCTCGGGAAACTGAGAGTAATACCGCATACGCCCTTTGGGGGAAAGATTTATCGGAGAAGGATCGGCCCGCGTTGGATTAGGTAGTTGGTGGGGTAATGGCCCACCAAGCCGACGATCCATAGCTGGTTTGAGAGGATGATCAGCCACACTGGGACTGAGACACGGCCCAG "Bacteria" "Proteobacteria" "Alphaproteobacteria" "Rhodobacterales" "Rhodobacteraceae" "Paracoccus" NA
GATGAACGCTGGCGGCGTGCCTAATACATGCAAGTCGAGCGAACAGATAAGGAGCTTGCTCCTTTGAAGTTAGCGGCGGACGGGTGAGTAACACGTGGGTAACCTACCTATAAGACTGGGATAACTTCGGGAAACCGGAGCTAATACCGGATAACATTTAGAACCGCATGGTTCTAAAGTGAAAGATGGTTTTGCTATCACTTATAGATGGACCCGCGCCGTATTAGCTAGTTGGTAAGGTAACGGCTTACCAAGGCGACGATACGTAGCCGACCTGAGAGGGTGATCGGCCACACTGGAACTGAGACACGGTCCAG "Bacteria" "Firmicutes" "Bacilli" "Bacillales" "Staphylococcaceae" "Staphylococcu…
GATAAACGCTGGCGGCGCACATAAGACATGCAAGTCGAACGAACTTAACCTTTAGTTTACTATTGGAGCGGTTAGTGGCGGACTGGTGAGTAACACGTAAGCAACCTGCCTATCAGAGGGGAACAACAGTTAGAAATGACTGCTAATACCGCATATGCCATGAGTATCACATGATACAAATGGGAAAGGAGCAATCCGCTGATAGATGGGCTTGCGTCTGATTAGATAGTTGGTGGGGTAATGGCCTACCAAGTCGACGATCAGTAGCCGAACTGAGAGGTTGAACGGCCACATTGGGACTGAGATACGGCCCAG "Bacteria" "Firmicutes" "Clostridia" "Clostridiales" "Ruminococcaceae" "Ruminococca…
GATGAACGCTGGCGGCGTGCTTAACACATGCAAGTCGAACGAAGCAAGAAGCGAAGCGCAAGCAGAGGTTCTTGACTGAGTGGCGGACGGGTGAGTAACGCGTGGATAACCTGCCTTTCACAGGGGGATAACAGCTGGAAACGGCTGCTAATACCGCATGAGCCTCTTTTATCGCATGACGGGAGAGGGAAAGAGAAATCGGTGAGAGATGGATCCGCGTCCGATTAGCTAGTTGGAGGGGTAACAGCCCACCAAGGCGACGATCGGTAGCCGACCTGAGAGGGTGGACGGCCACATTGGGACTGAGACACGGCCCAA "Bacteria" "Firmicutes" "Clostridia" "Clostridiales" "Lachnospiraceae" NA NA
GATGAACGCTGGCGGCGTGCCTAACACATGCAAGTCGAACGGGGCGTGCCCATGGAAACTTTTCGGAGCGGACATGGGCGCTGCCTAGTGGCGGACGGGTGAGTAACGCGTGGGCAACCTACCCTGCACTGGGGGACAACAGCCGGAAACGGCTGCTAATACCGCATATCCCCGCTGCCCCACATGGGGCGGCAGGGAAAGCTCCGGCGGTGCAGGATGGGCCCGCGTCTGATTAGCTGGTTGGCGGGGCAACGGCCCACCAAGGCGACGATCAGTAGCCGGCCTGAGAGGGTGGACGGCCACATTGGGACTGAGACACGGCCCAG "Bacteria" "Firmicutes" "Clostridia" "Clostridiales" "Lachnospiraceae" "…
GATGAACGCTGGCGGCGTGCCTAACACATGCAAGTCGAACGGAGCTATTTAGGAAACTTCCTTCGGGGAGCGGAATCTTTAGCTTAGTGGCGGACGGGTGAGTAACGCGTGAGCAATCTGCCTTTGGATGGGGGATAACAGCCGGAAACGGCTGCTAATACCGCATAATGCAACGGGACCGCATGGTTCTGCTACCAAAGATTTATTGTCCAAAGATGAGCTCGCGTCTGATTAGCCAGTTGGCGGGGTAACGGCCCACCAAAGCGACGATCAGTAGCCGGACTGAGAGGTTGAACGGCCACATTGGGACTGAGACACGGCCCAG "Bacteria" "Firmicutes" "Clostridia" "Clostridiales" "Ruminococcaceae" "B…
GATGAACGCTGGCGGCGTGCTTAACACATGCAAGTCGAACGGAGCTGTATTGAAACCTAGTGATATGCAGCTTAGTGGCGGACGGGTGAGTAACGCGTGGGCAACCTGCCGCATACCGGGGGATAACACTTAGAAATAGGTGCTAATACCGCATAAGCGCACAGAGCCGCATGGCTTGGTGTGAAAAACTCCGGTGGTATGCGATGGGCCCGCGTCTGATTAGCTGGTTGGCGGGGTAGAAGCCCACCAAGGCGACGATCAGTAGCCGGCCTGAGAGGGCGGACGGCCACATTGGGACTGAGACACGGCCCAG "Bacteria" "Firmicutes" "Clostridia" "Clostridiales" "Lachnospiraceae" "Lachnospirace…
GATGAACGCTGGCGGCGTGCCTAACACATGCAAGTCGAACGGGTGTACGGGATGGAAGGCTCCGGCCGGAAGCCCCGTGCATGAGTGGCGGACGGGTGAGTAACGCGTGGGCAACCTGCCCTGTACAGGGGGACAACACTTAGAAATAGGTGCTAATACCGCATAACGGGGGGAGCCGCATGGCCCCCCCCCTGAAAACTCCGGTGGTACAGGATGGGCCCGCGTCTGATTAGCTAGTTGGCAGGGTAACGGCCTACCAAGGCGACGATCAGTAGCCGGCCTGAGAGGGCGGACGGCCACACTGGGACTGAGACACGGCCCAG "Bacteria" "Firmicutes" "Clostridia" "Clostridiales" "Lachnospiraceae" NA NA
GATGAACGCTGGCGGCGTGCTTAACACATGCAAGTCGAACGAAGCGCTTAAGGACAATTCTTCGGAGGCGTACTTTTGCGACTGAGTGGCGGACGGGTGAGTAACGCGTGGGTAACCTGCCCTATACAGGGGGATAACAGTTAGAAATGACTGCTAATACCGCATAAGCGCACTAGAACCGCATGGTTCGGTGTGAAAAACTGAGGTGGTATAGGATGGACCCGCGTCTGATTAGCTTGTTGGTGGGGTAACGGCTCACCAAGGCGACGATCAGTAGCCGGCCTGAGAGGGCGACCGGCCACATTGGGACTGAGACACGGCCCAA "Bacteria" "Firmicutes" "Clostridia" "Clostridiales" "Lachnospiraceae" NA…
GATGAACGCTGGCGGCGTGCTTAACACATGCAAGTCGAACGGGGGCAGGAGGAAACCTAGTGAATCCTGCCCTAGTGGCGGACGGGTGAGTAACGCGTGGGCAACCTGCCGCATACCGGGGGATAACACTTAGAAATAGGTGCTAATACCGCATAAGCGCACAGAGCCGCATGGCTTGGTGTGAAAAACTCCGGTGGTATGCGATGGGCCCGCGTCTGATTAGCTTGTTGGCGGGGCAGCGGCCCACCAAGGCGACGATCAGTAGCCGGCCTGAGAGGGTGGACGGCCACATTGGGACTGAGACACGGCCCAG "Bacteria" "Firmicutes" "Clostridia" "Clostridiales" "Lachnospiraceae" "Lachnospirace…
[truncated: 2,089 more rows]
